# Supplementary material
Source: publisher site journal article supplement (https://www.dovepress.com/article/538895)

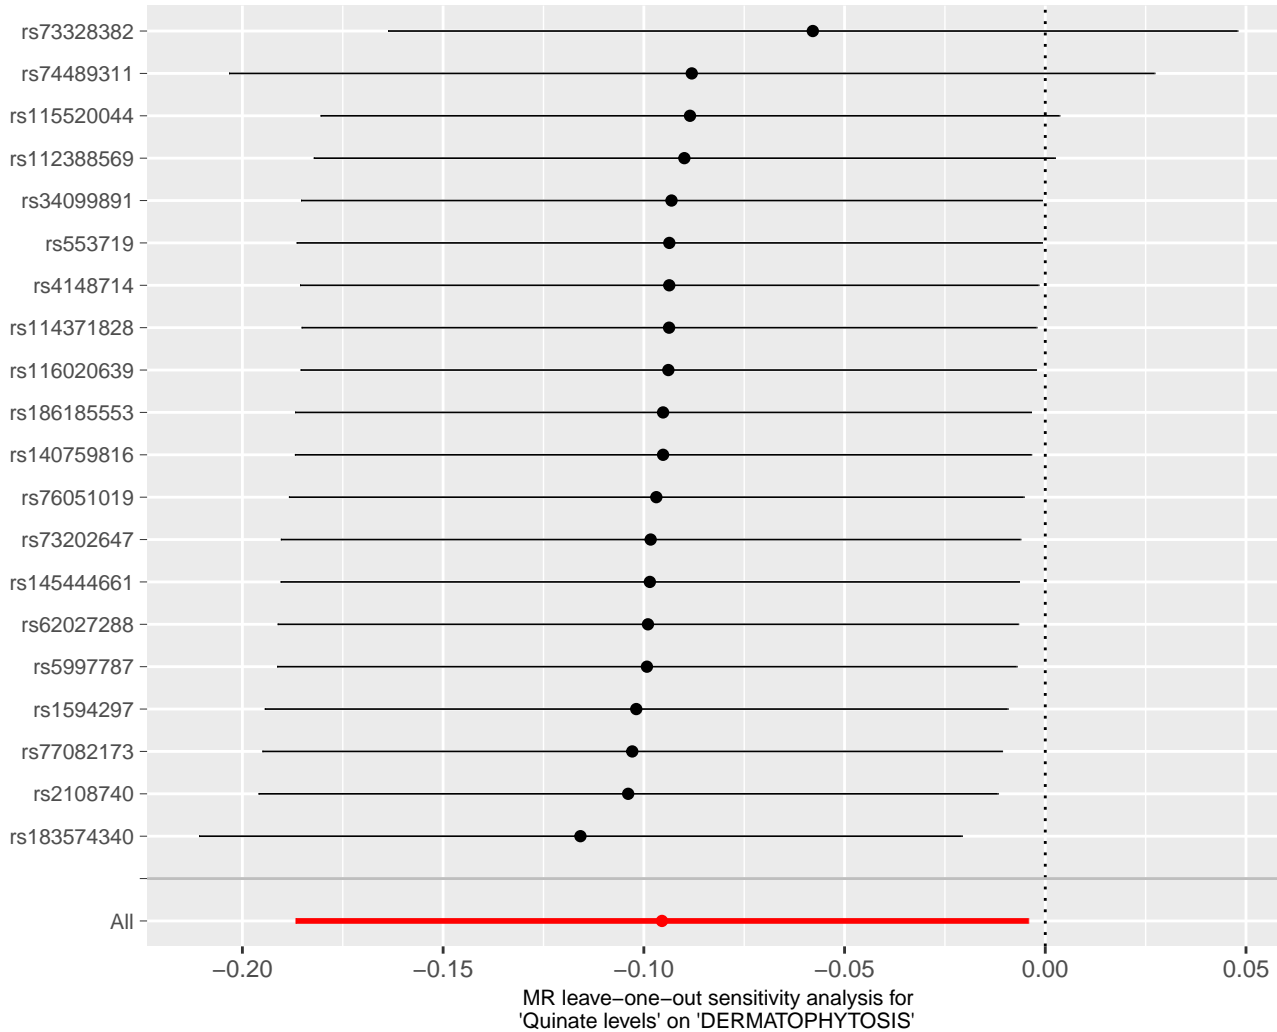

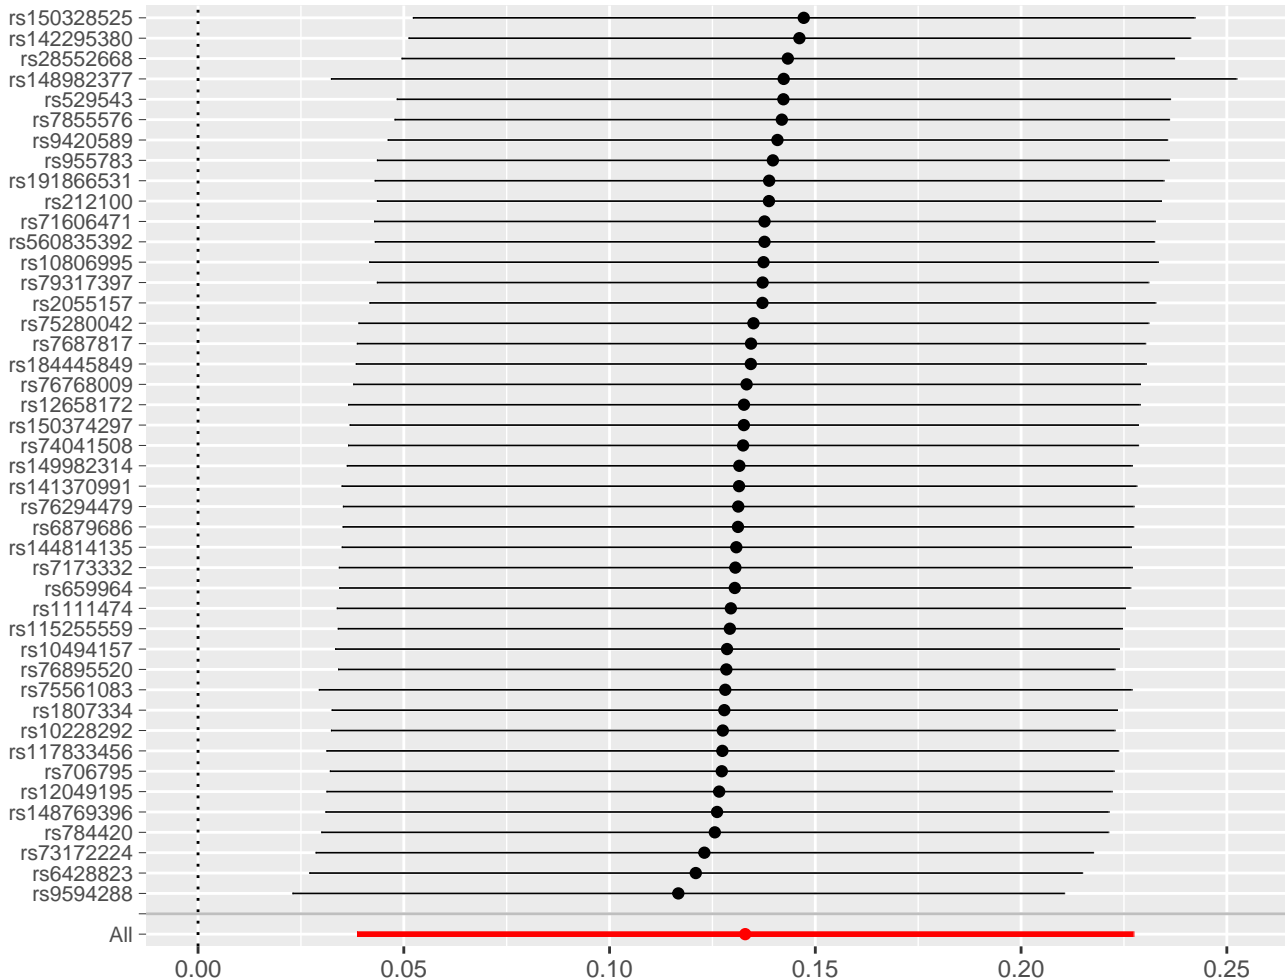

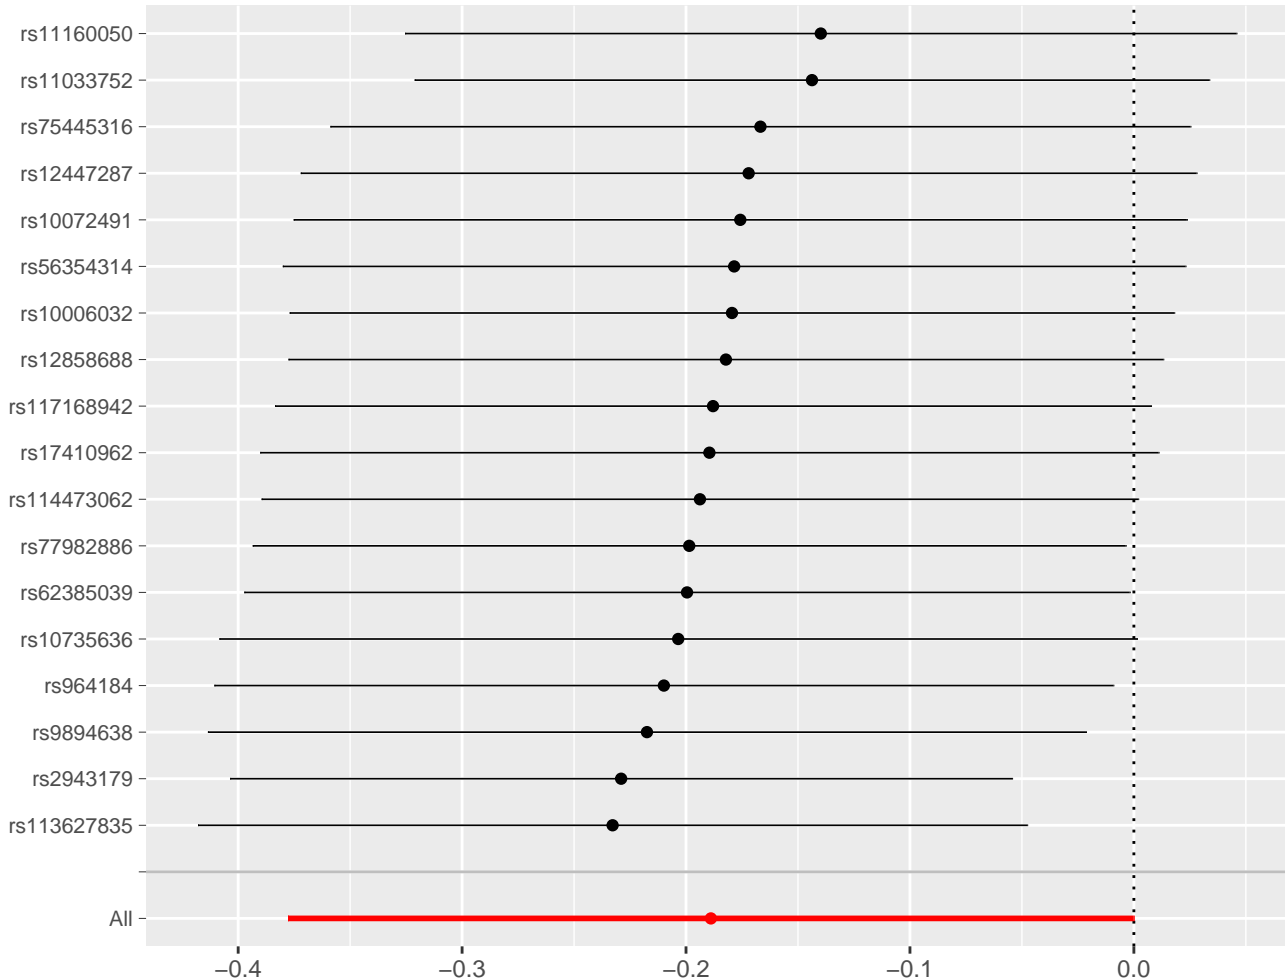

MR leave-one-out sensitivity analysis for '1-linoleoylglycerol (18:2) levels' on 'DERMATOPHYTOSIS'

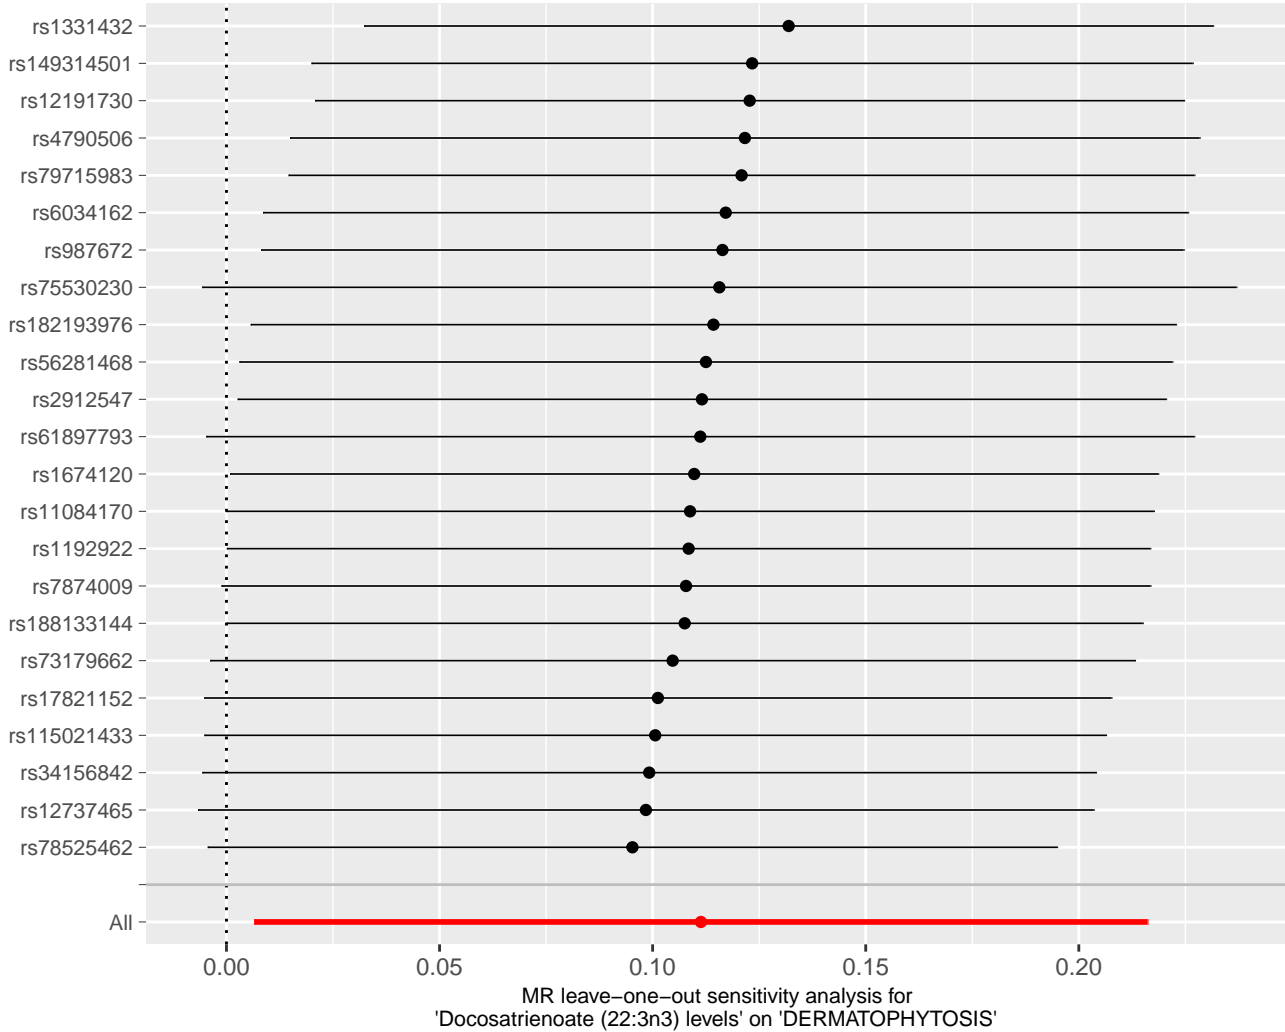

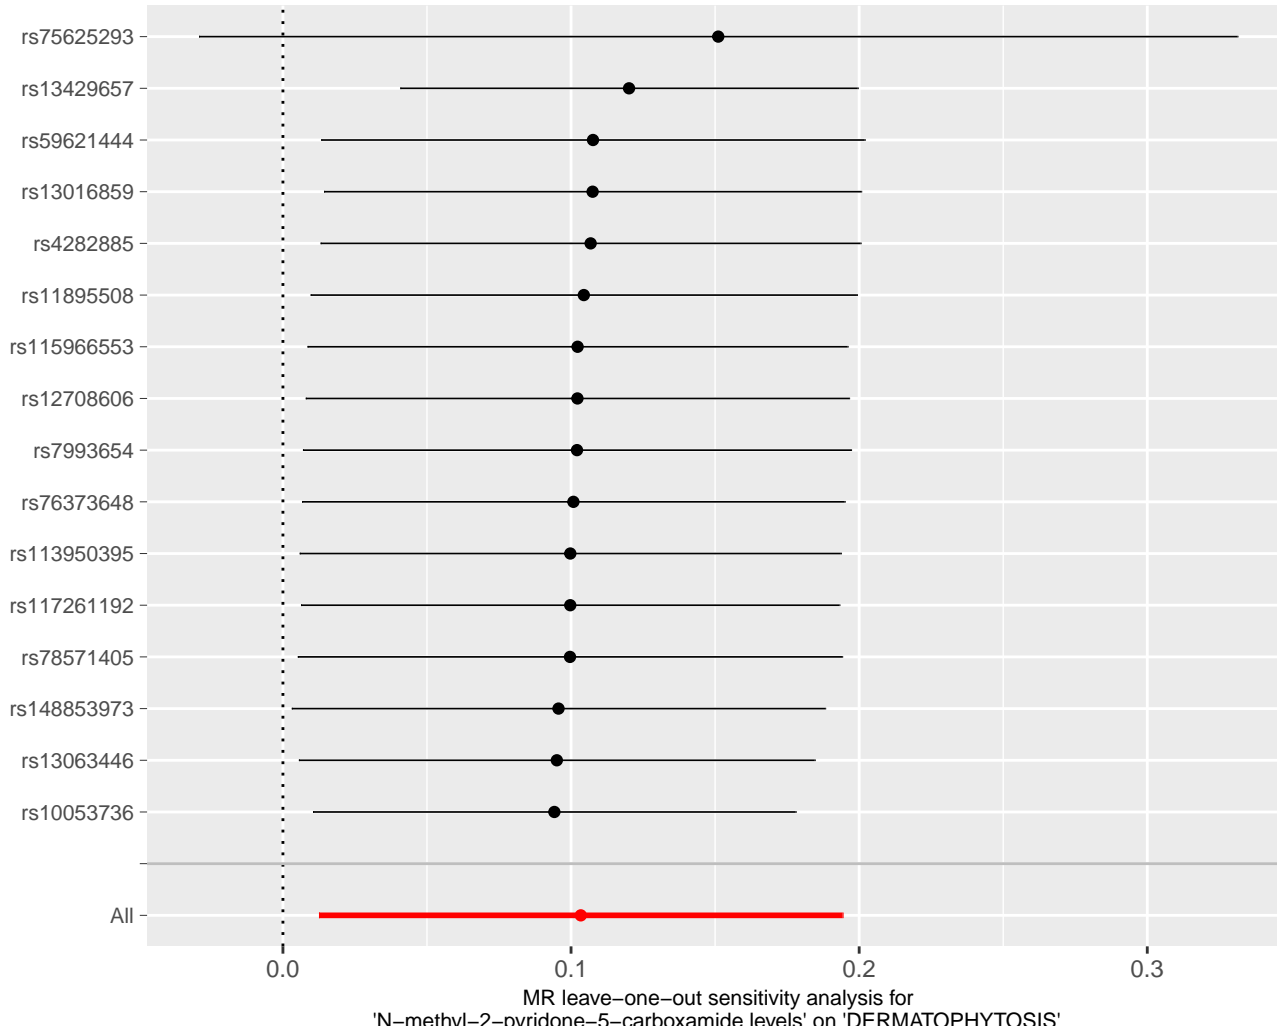

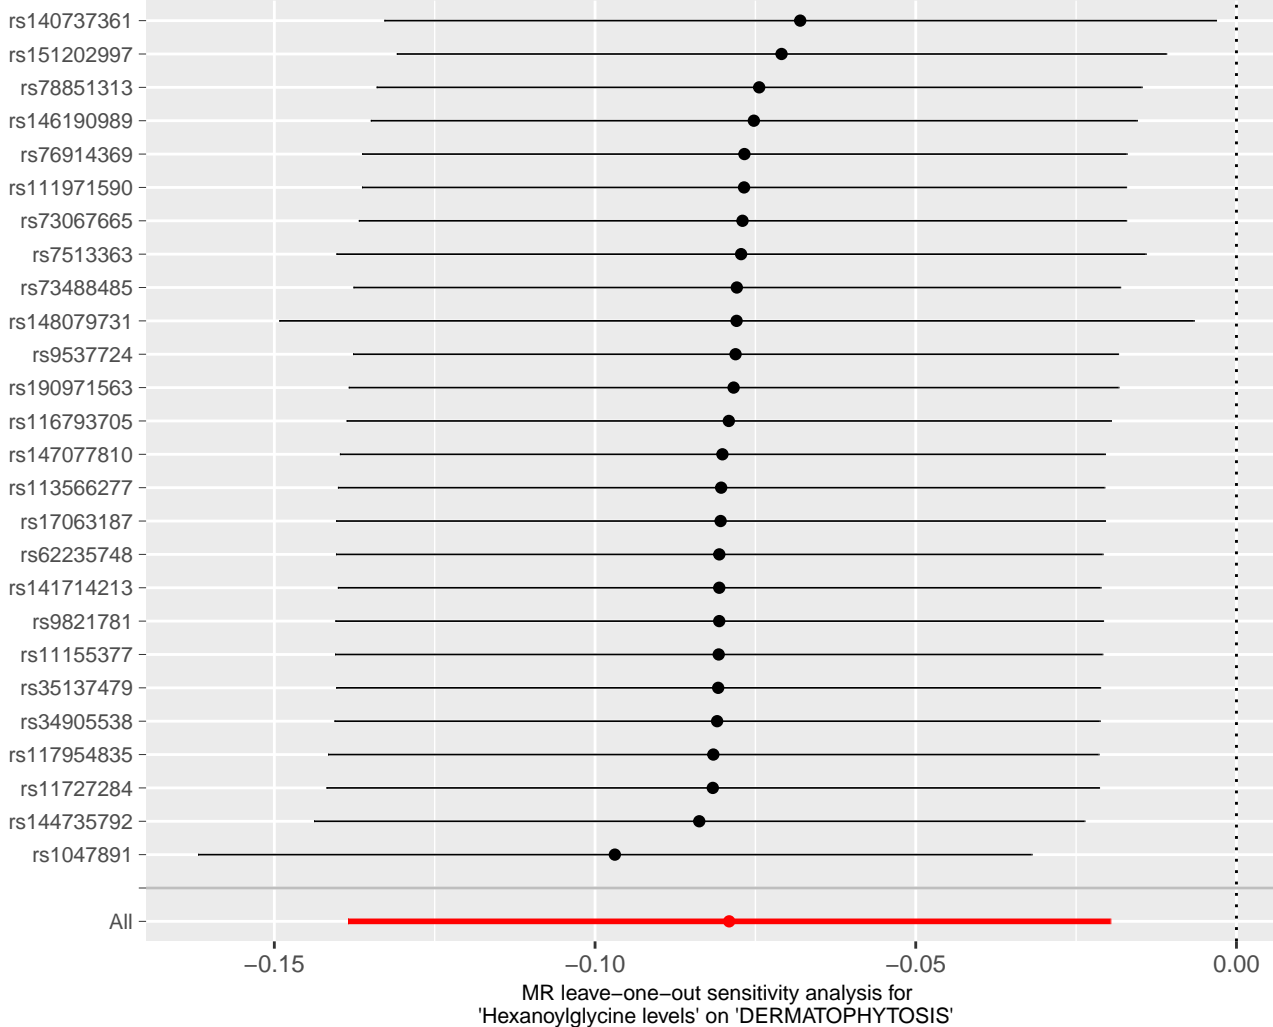

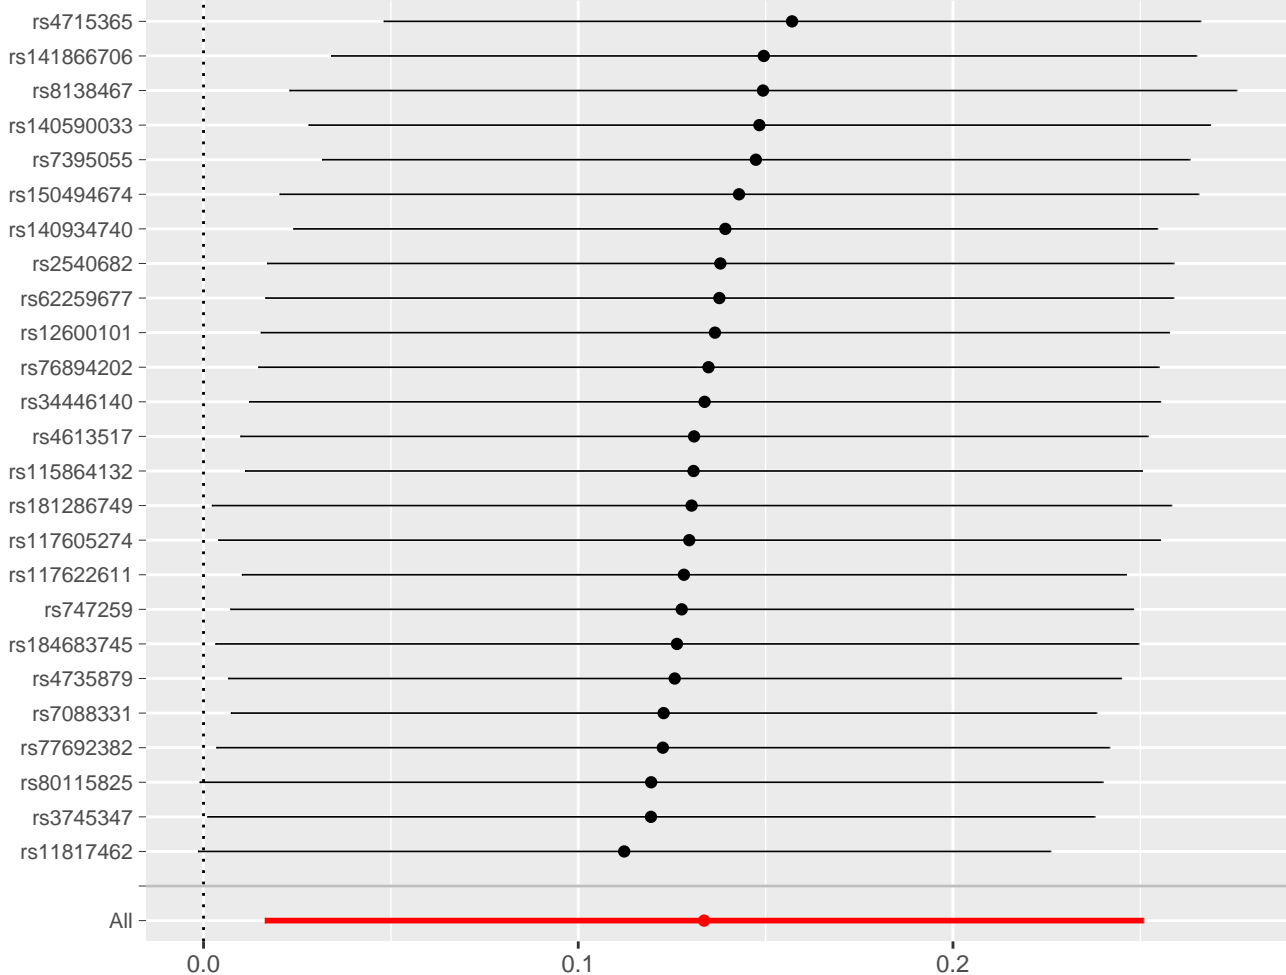

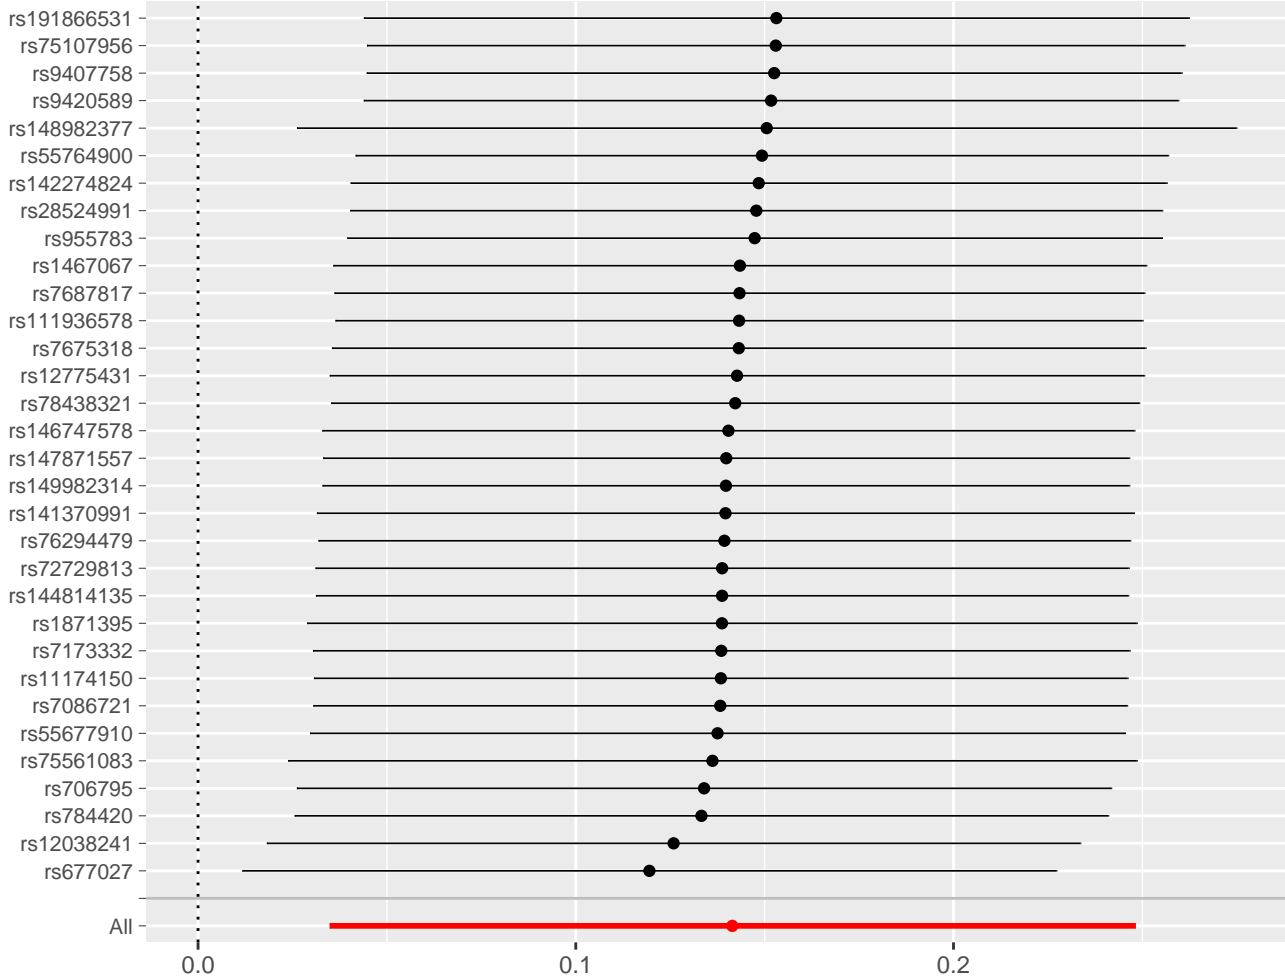

MR leave-one-out sensitivity analysis for 'Androstenediol (3beta,17beta) monosulfate (1) levels' on 'DERMATOPHYTOSIS'

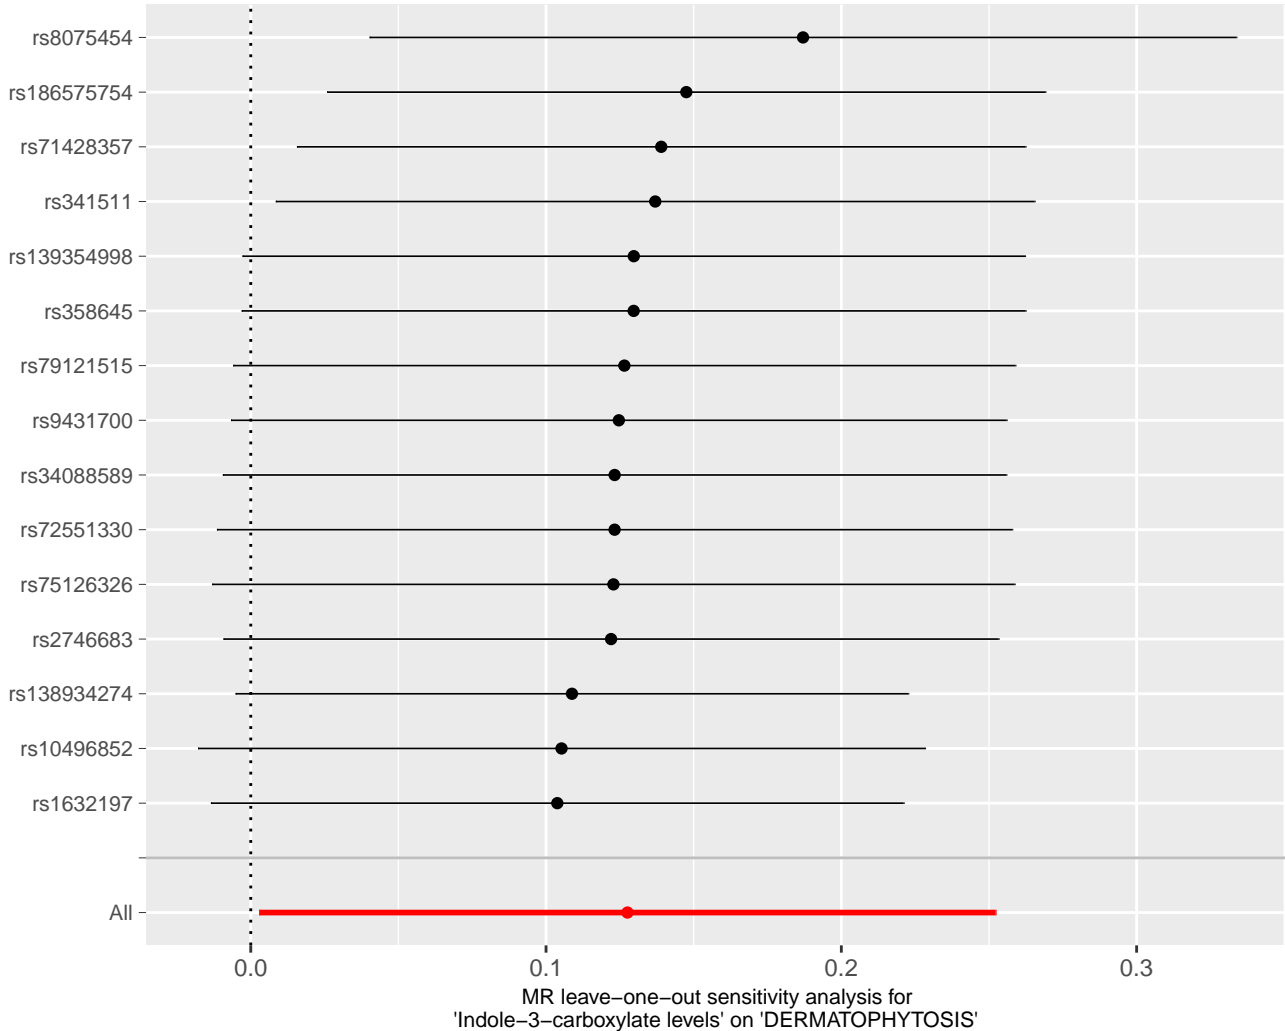

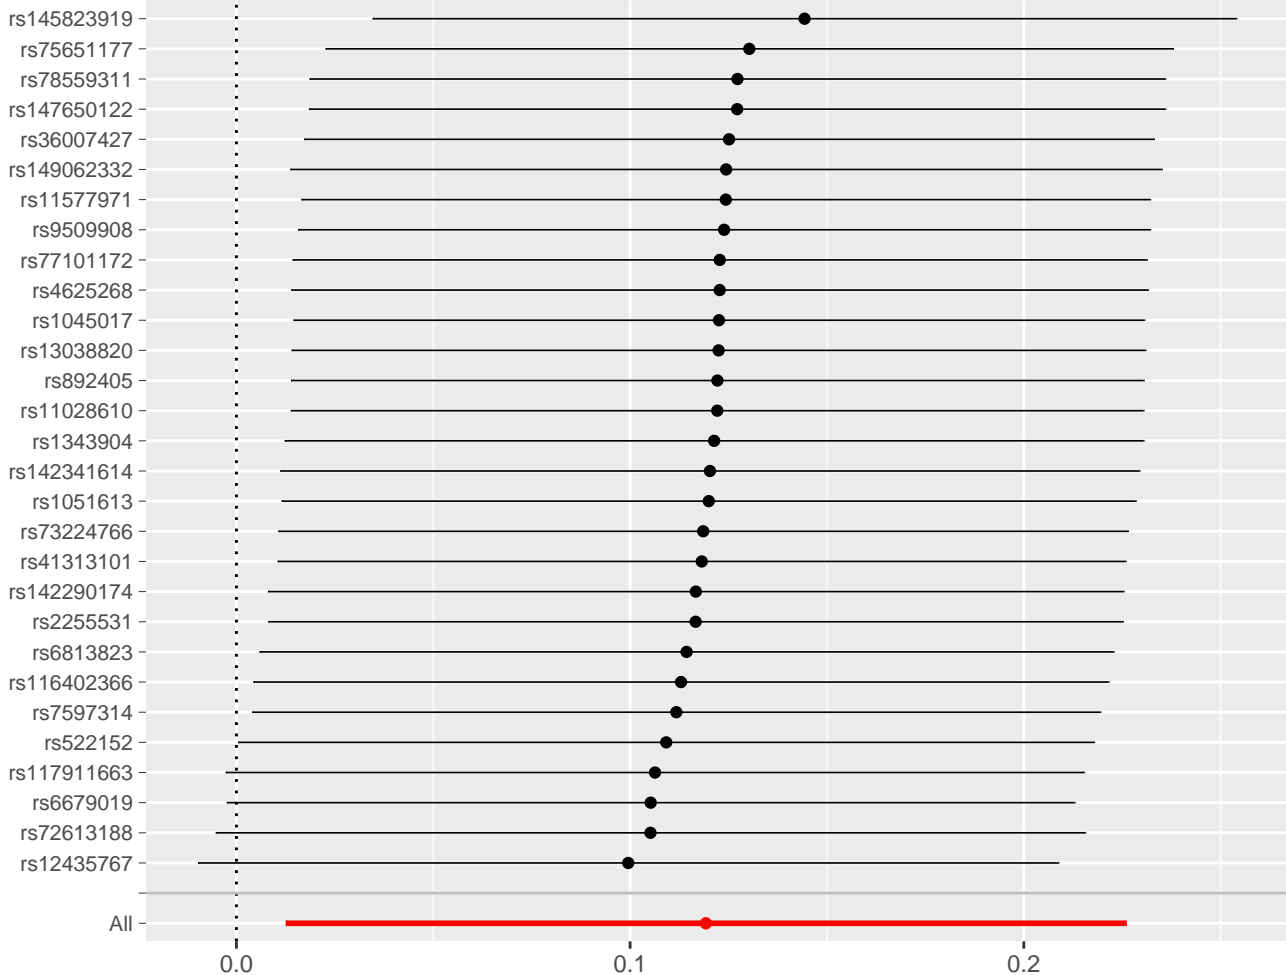

MR leave-one-out sensitivity analysis for 'Sulfate levels' on 'DERMATOPHYTOSIS'

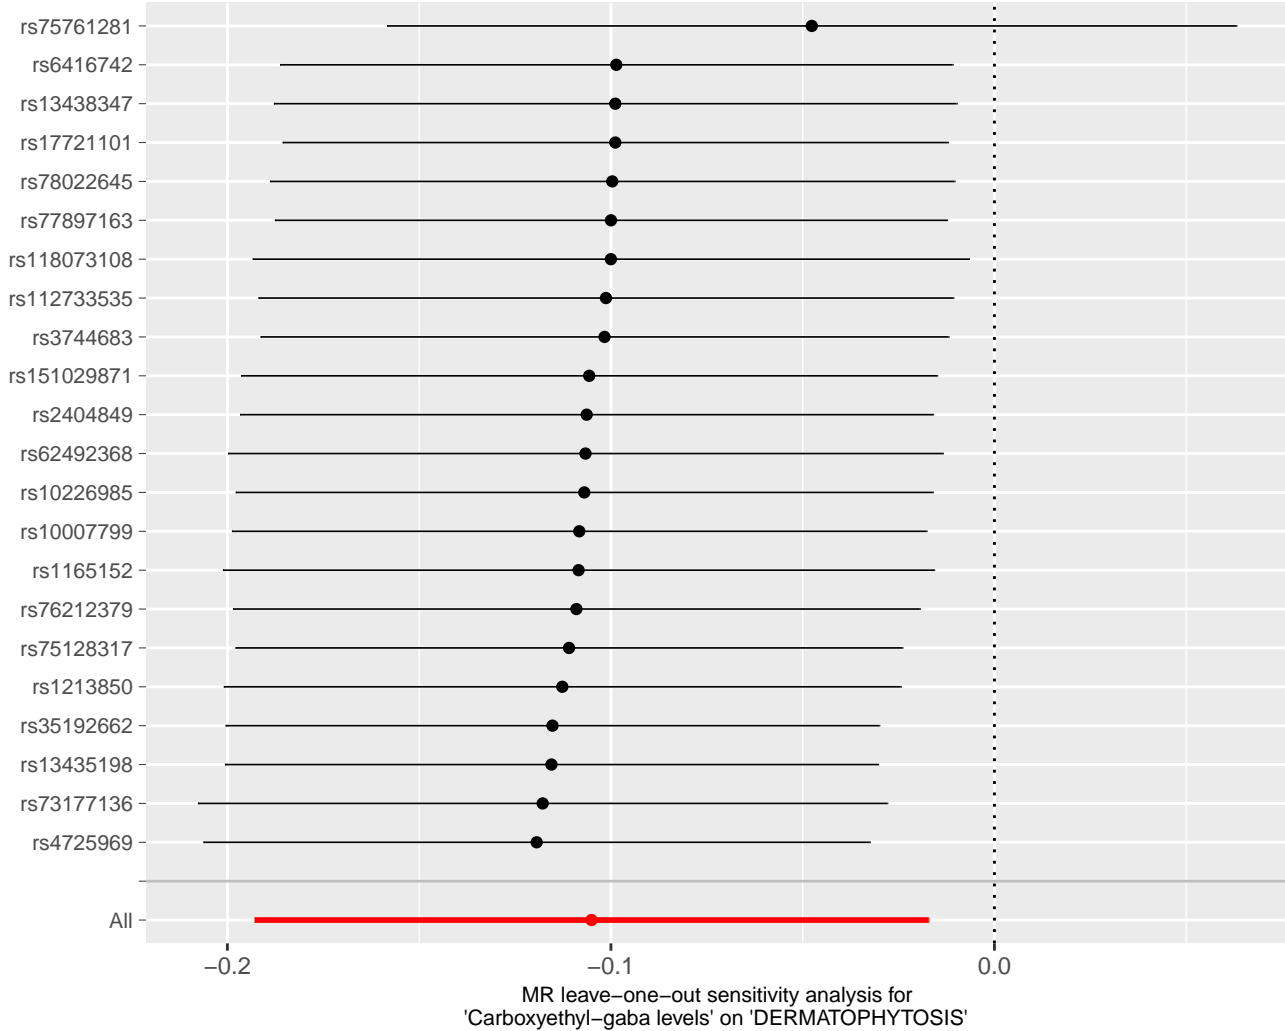

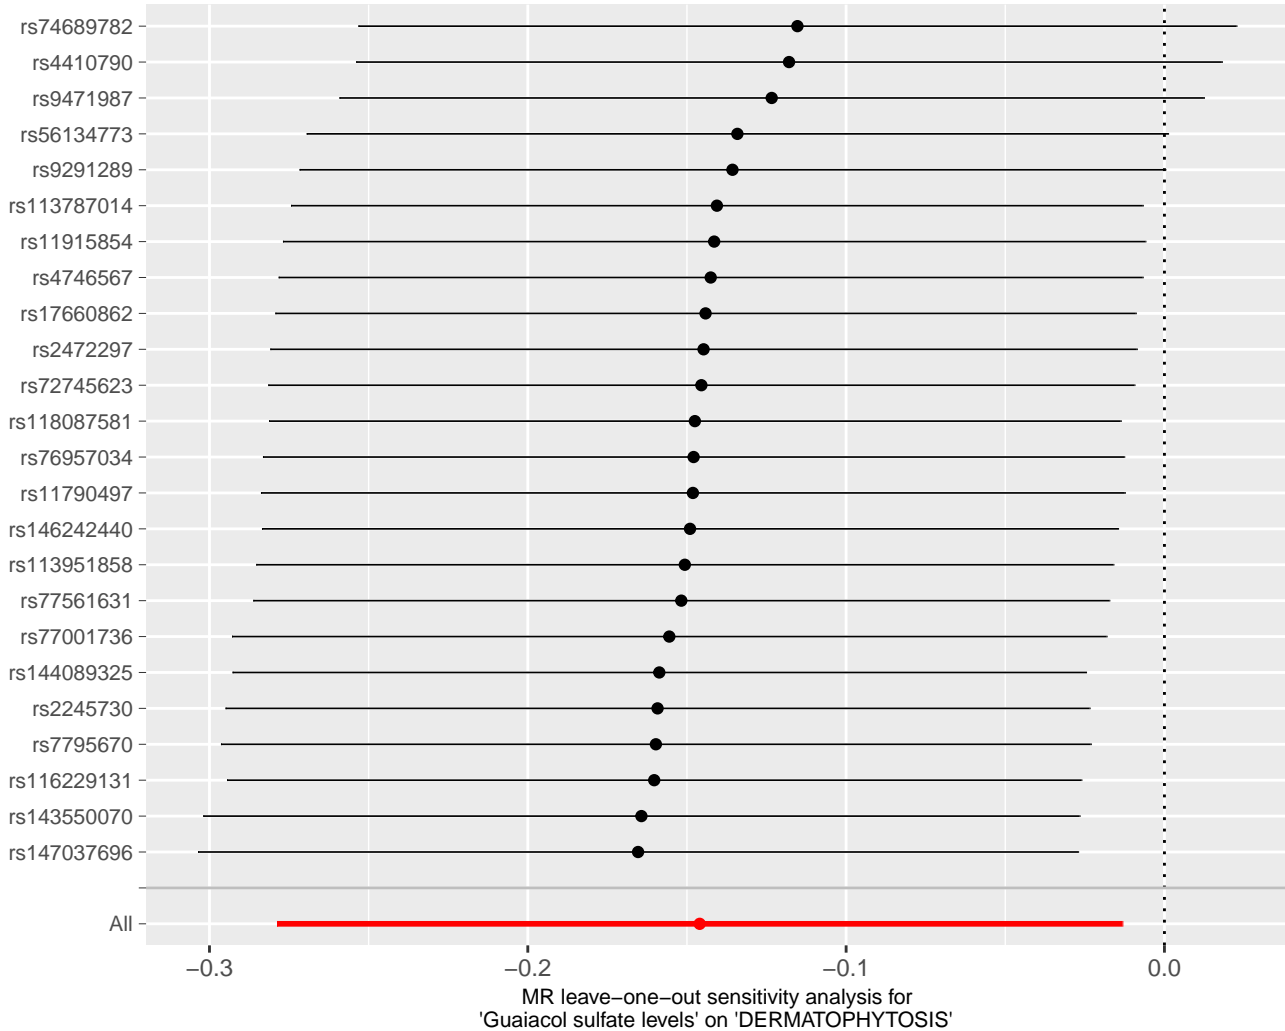

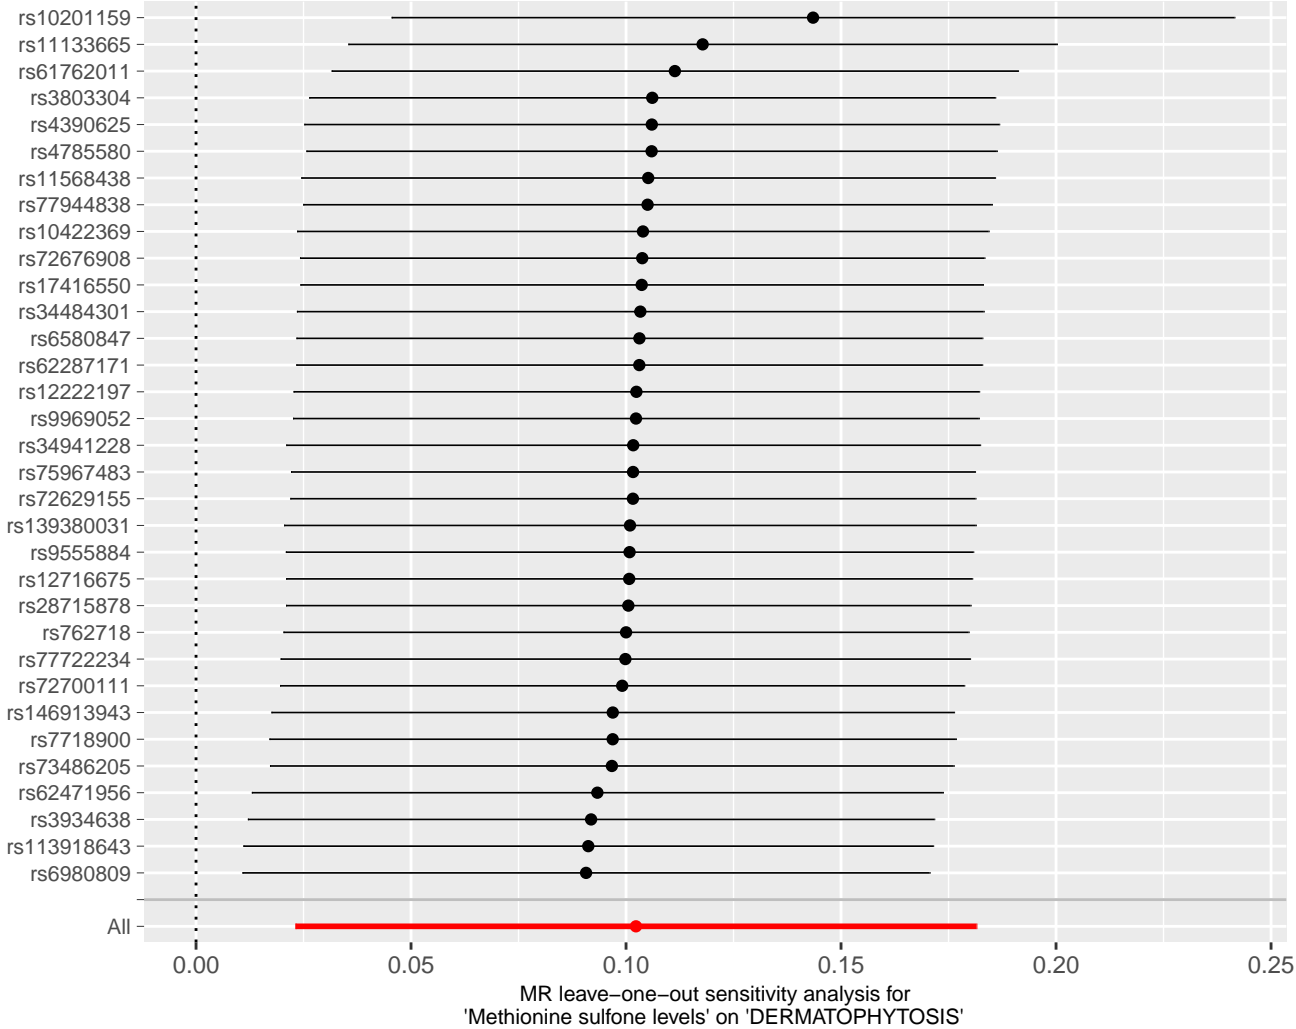

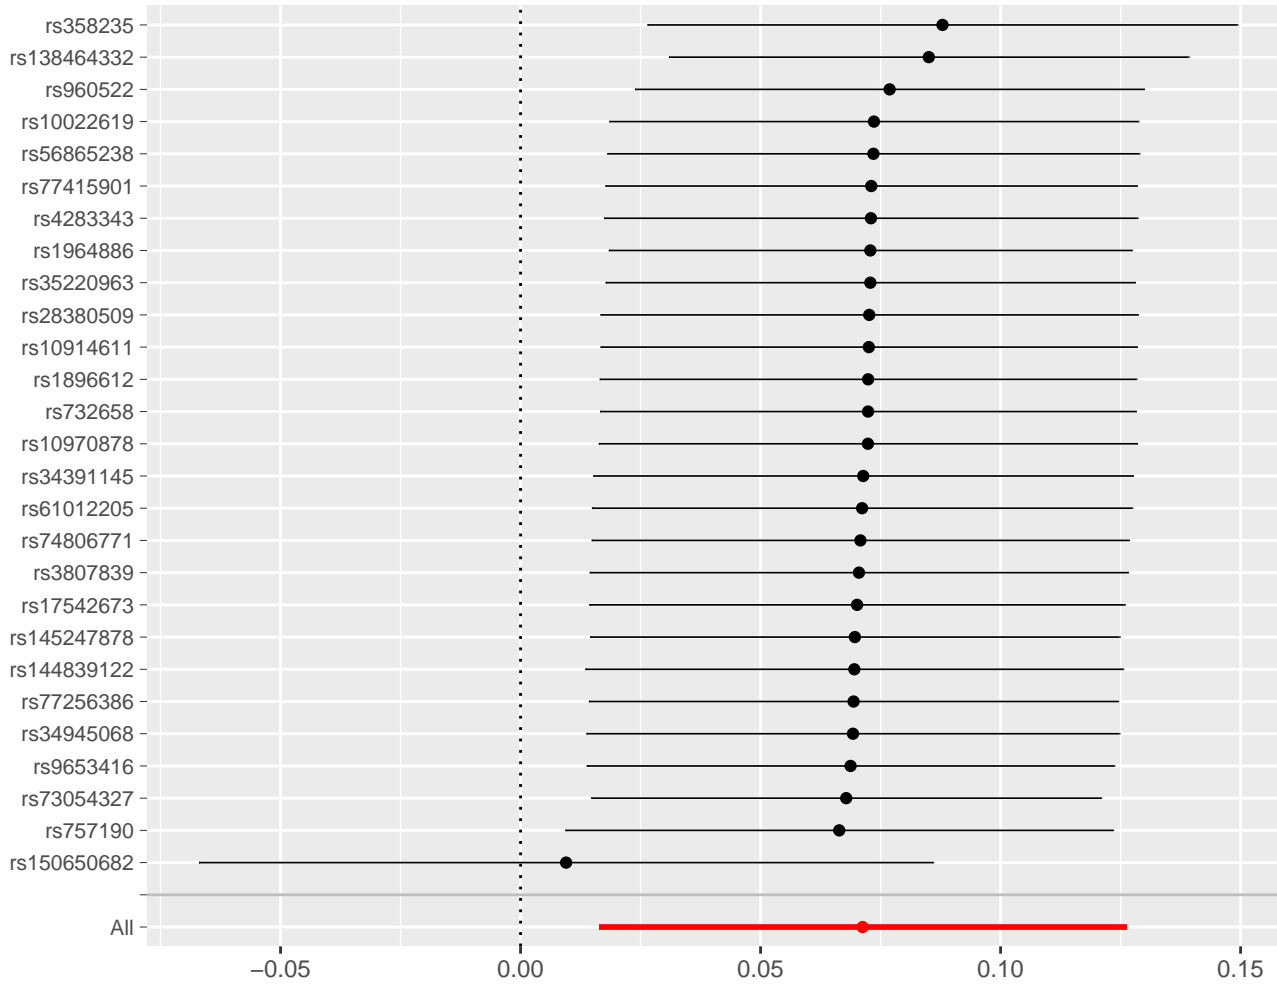

MR leave-one-out sensitivity analysis for  
'Methyl glucopyranoside (alpha + beta) levels' on 'DERMATOPHYTOSIS'

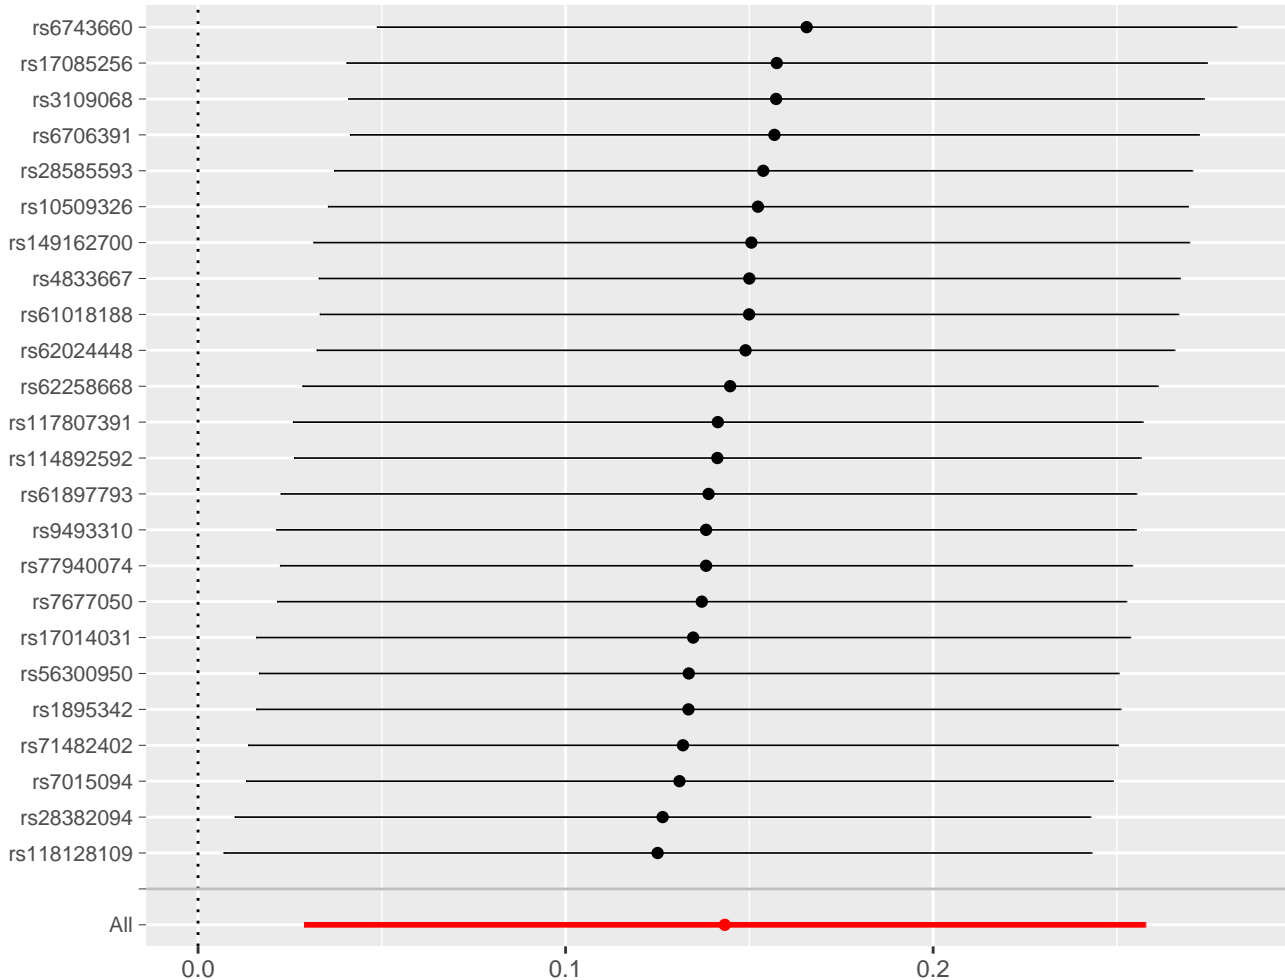

MR leave-one-out sensitivity analysis for  
'1-dihomo-linolenylglycerol (20:3) levels' on 'DERMATOPHYTOSIS'

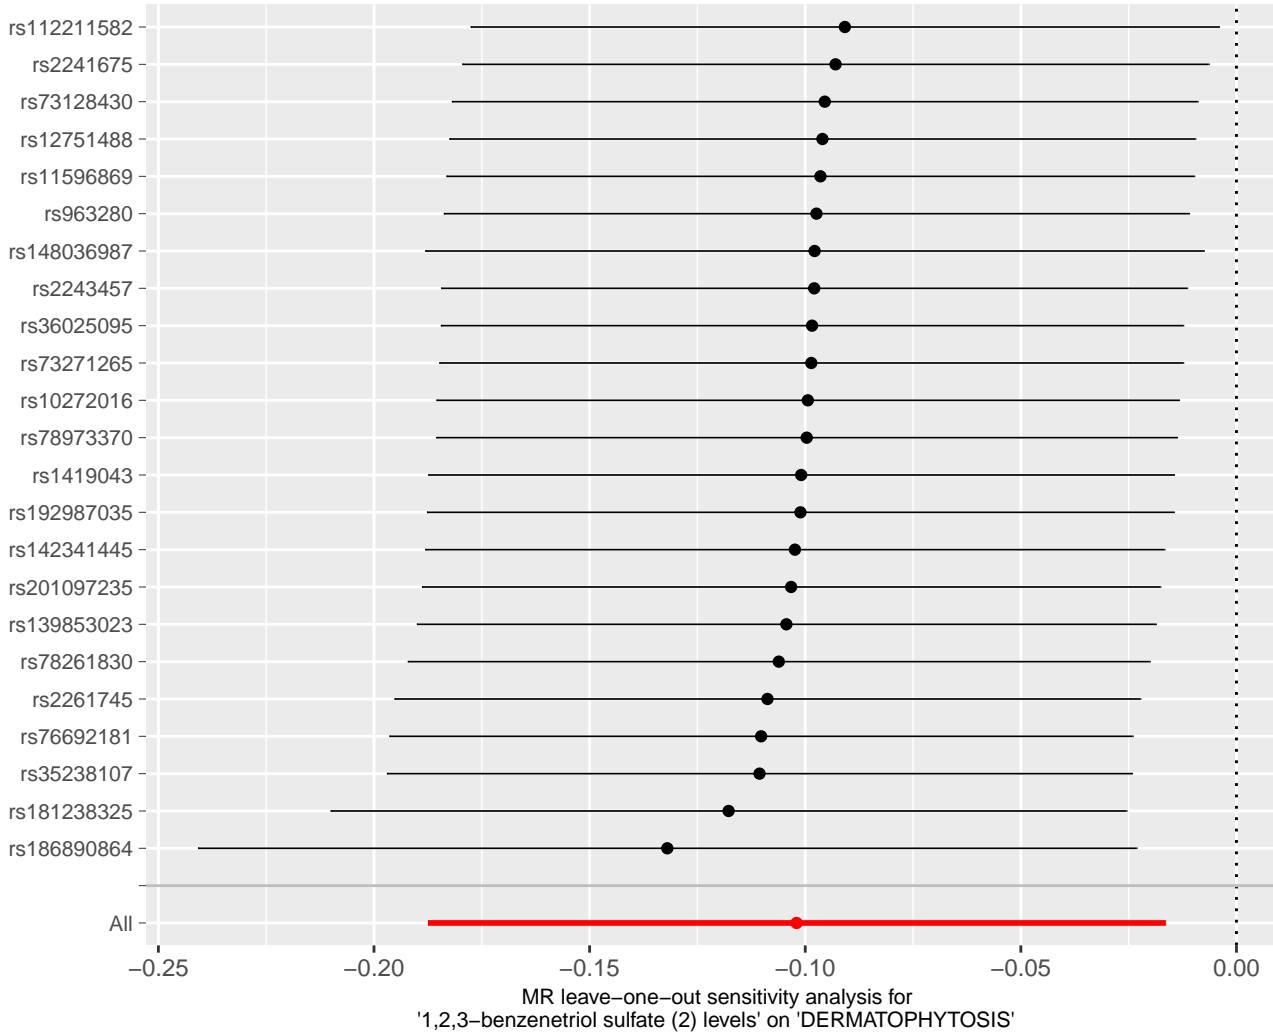

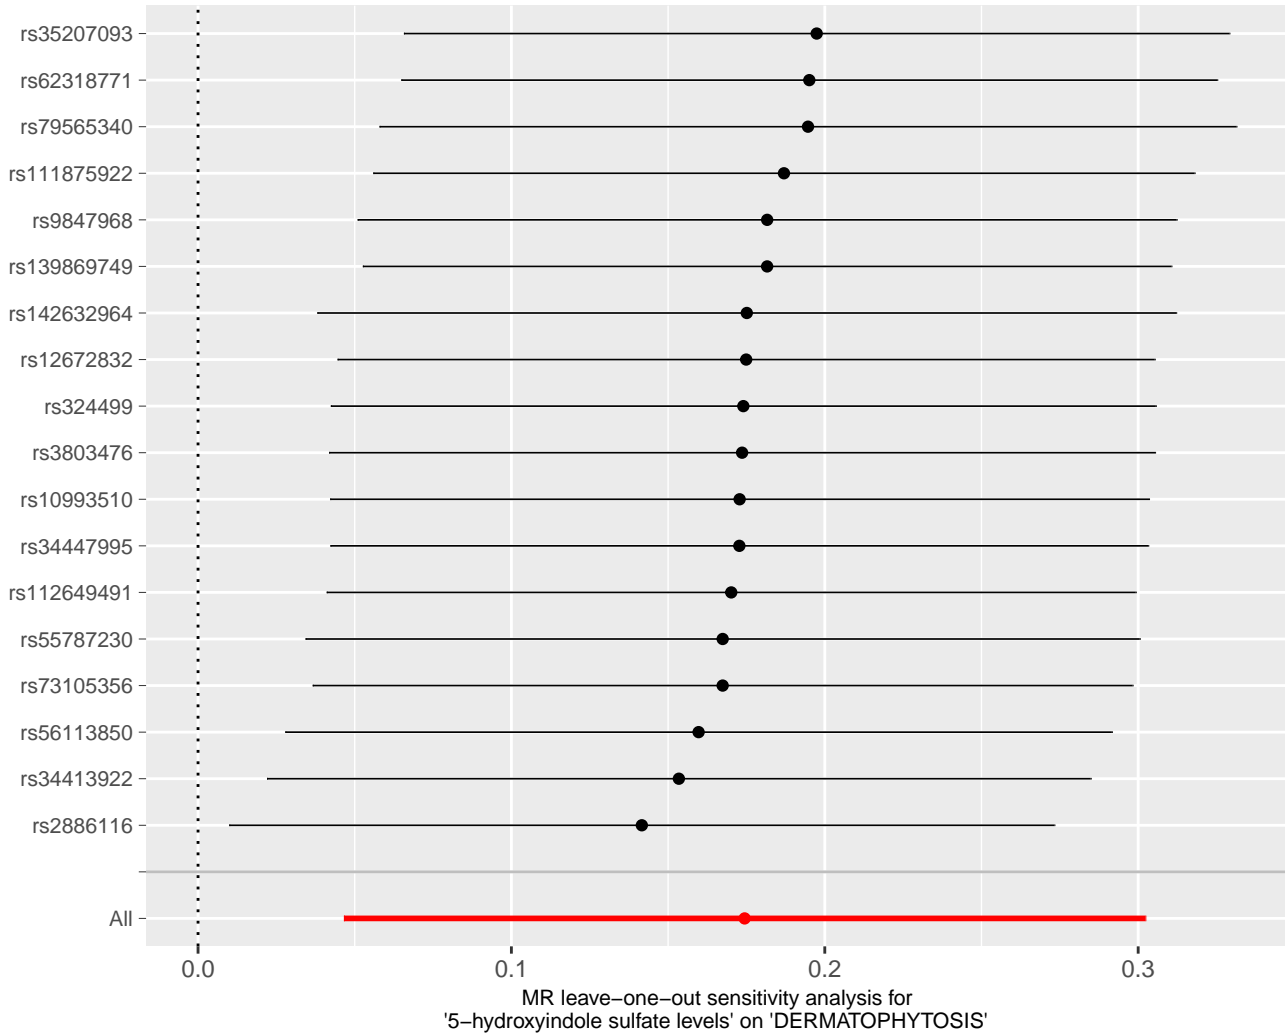

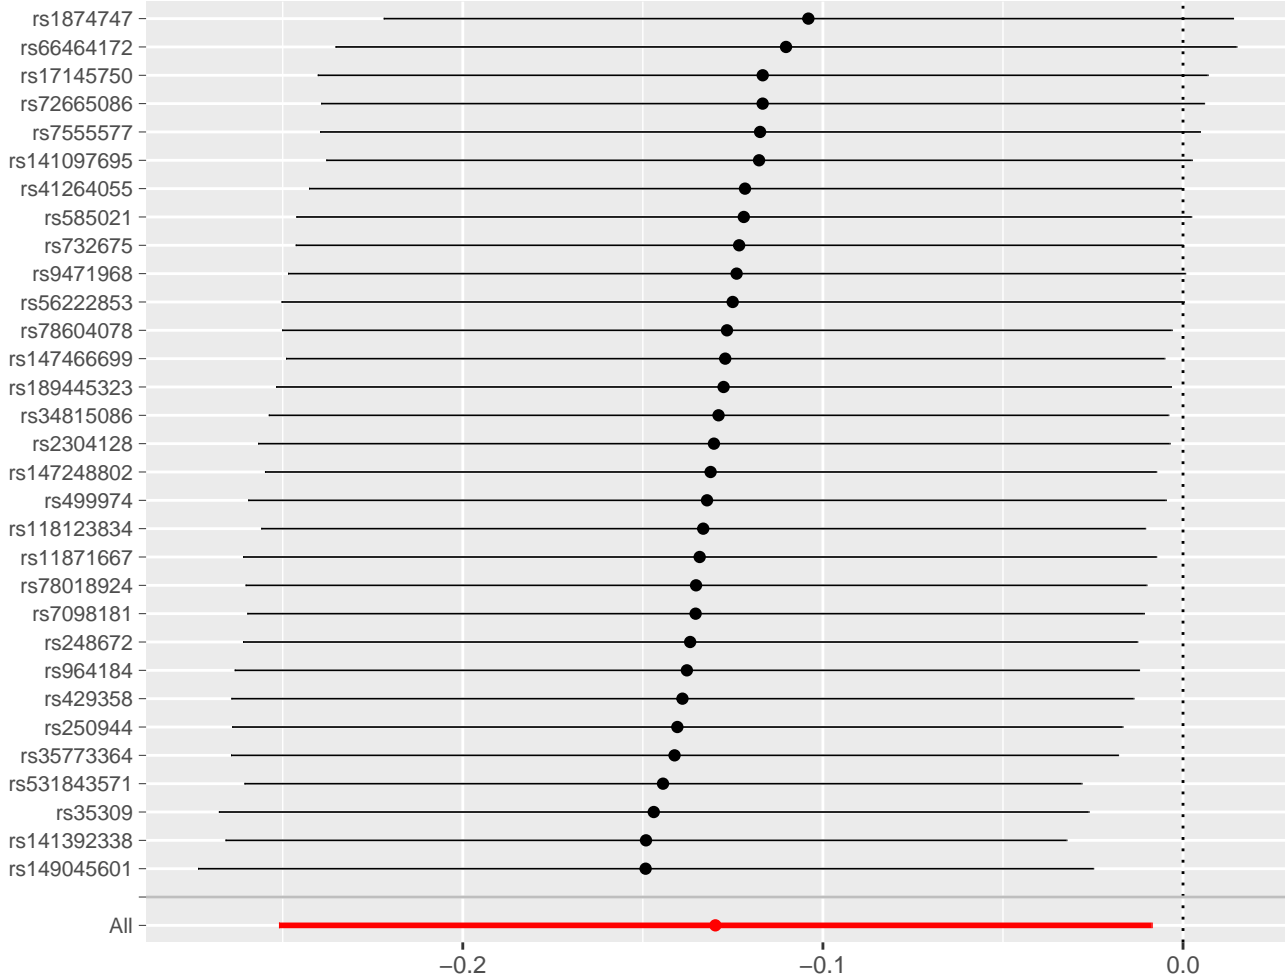

MR leave-one-out sensitivity analysis for '1-oleoyl-2-docosahexaenoyl-GPC (18:1/22:6) levels' on 'DERMATOPHYTOSIS'

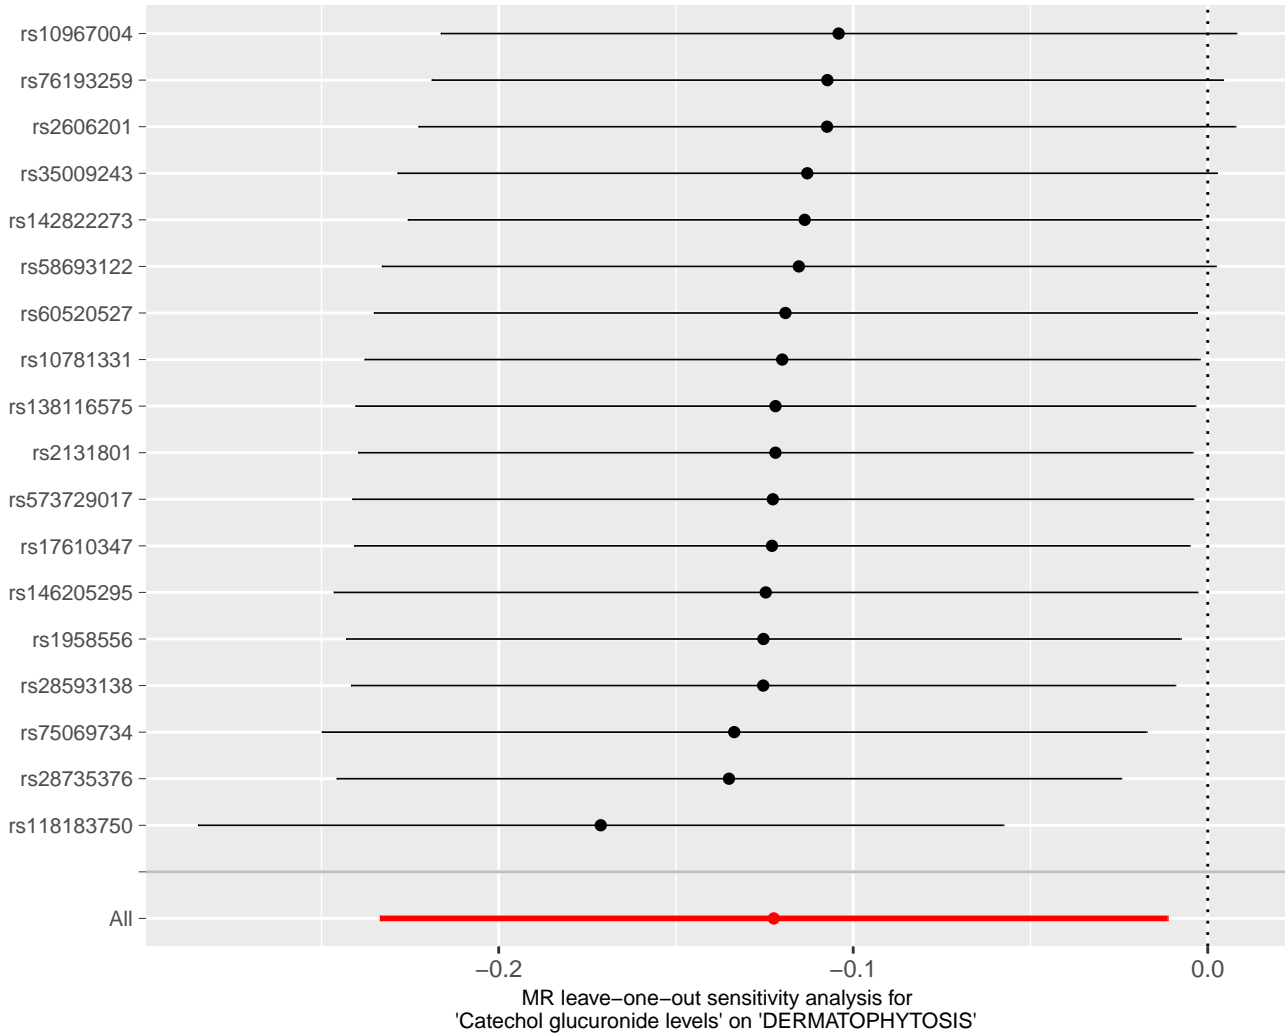

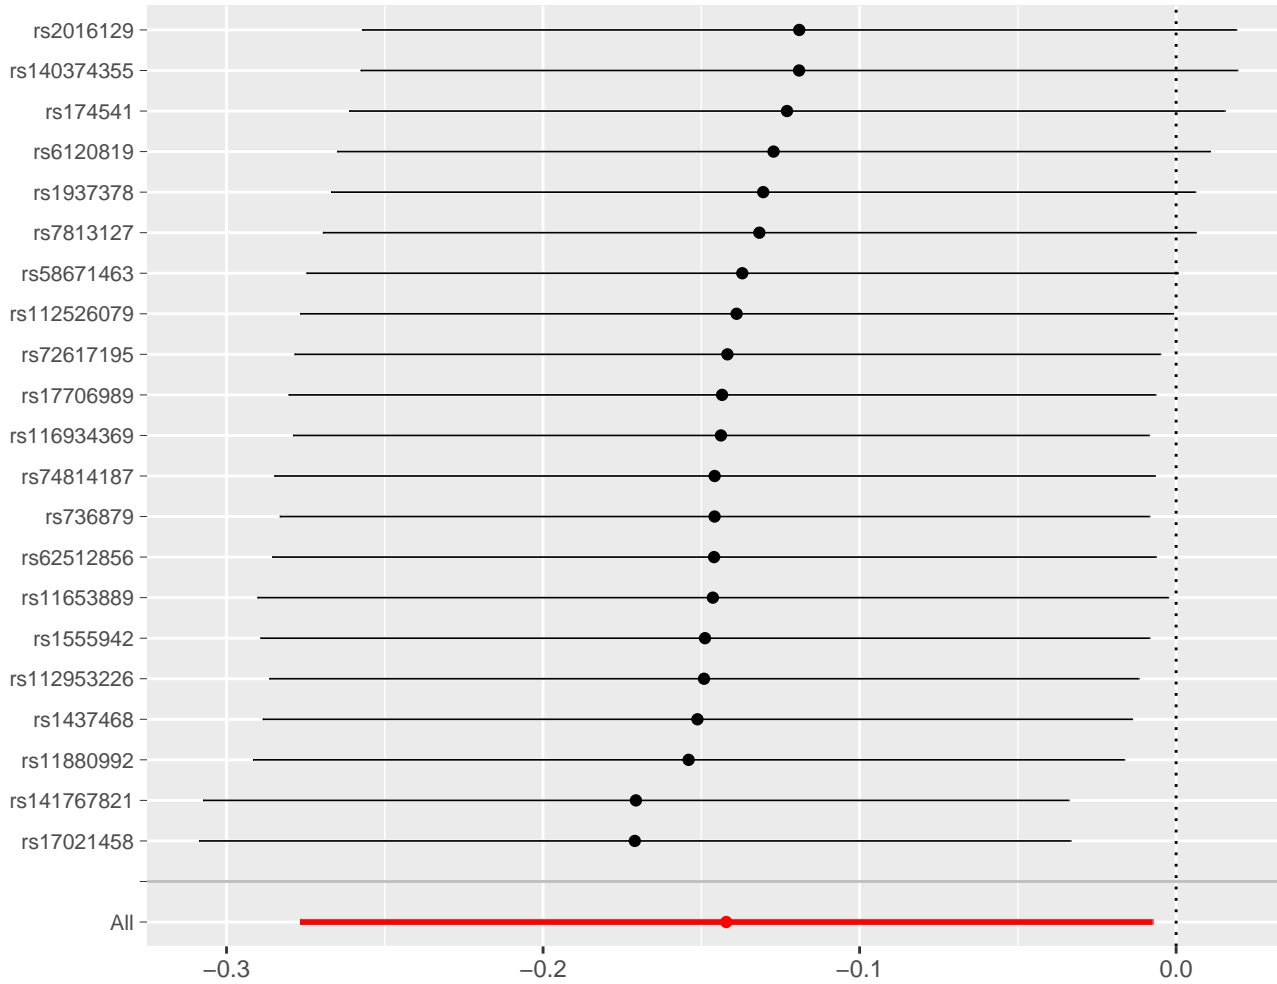

MR leave-one-out sensitivity analysis for 'Linoyleylcholine levels' on 'DERMATOPHYTOSIS'

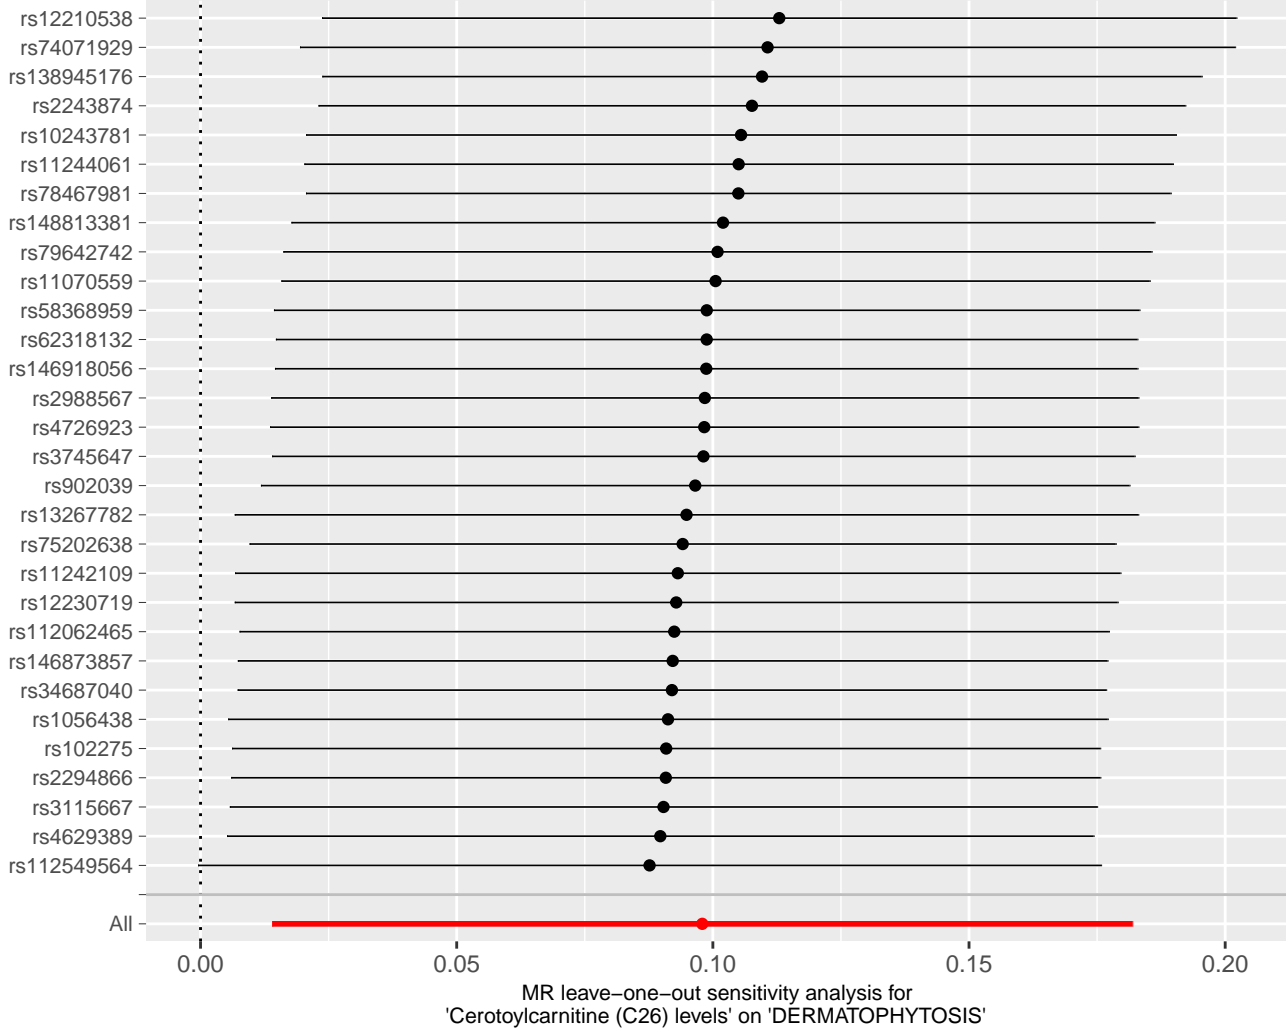

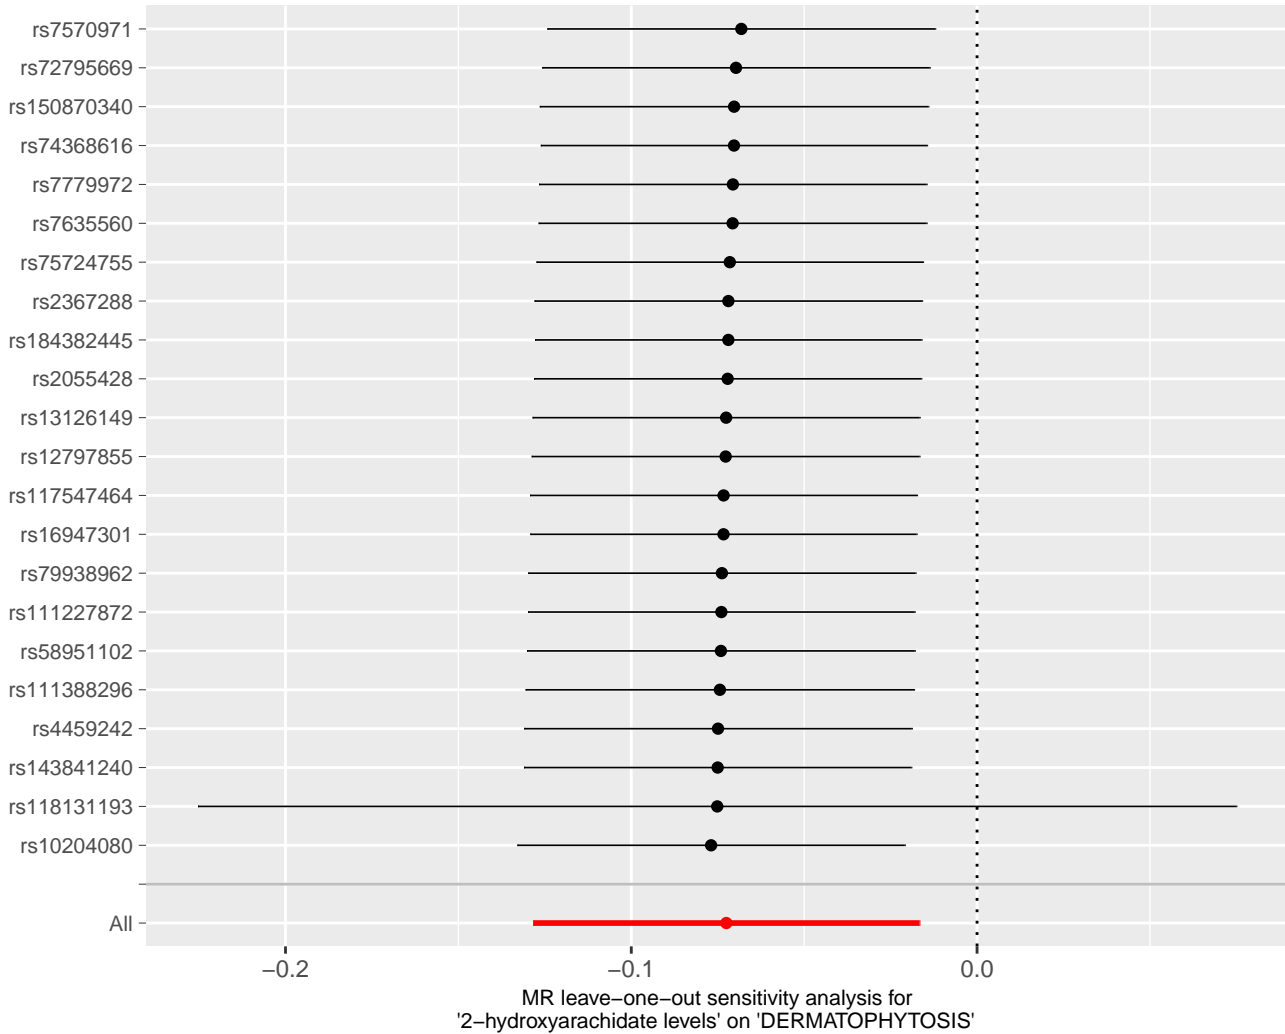

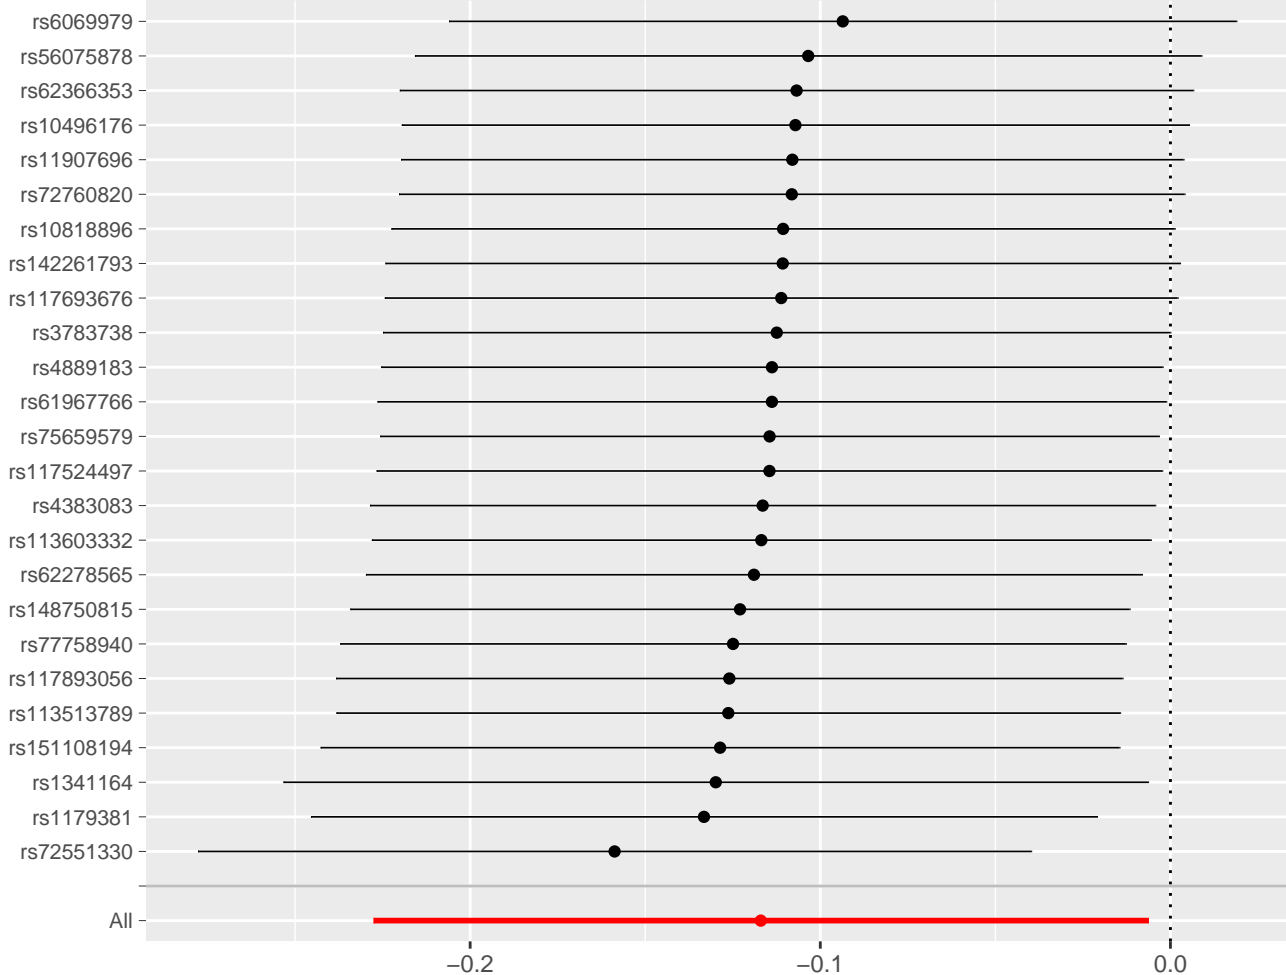

MR leave-one-out sensitivity analysis for  
'3-carboxy-4-methyl-5-pentyl-2-furanpropionate (3-CMPFP) levels' on 'DERMATOPHYTOSIS'

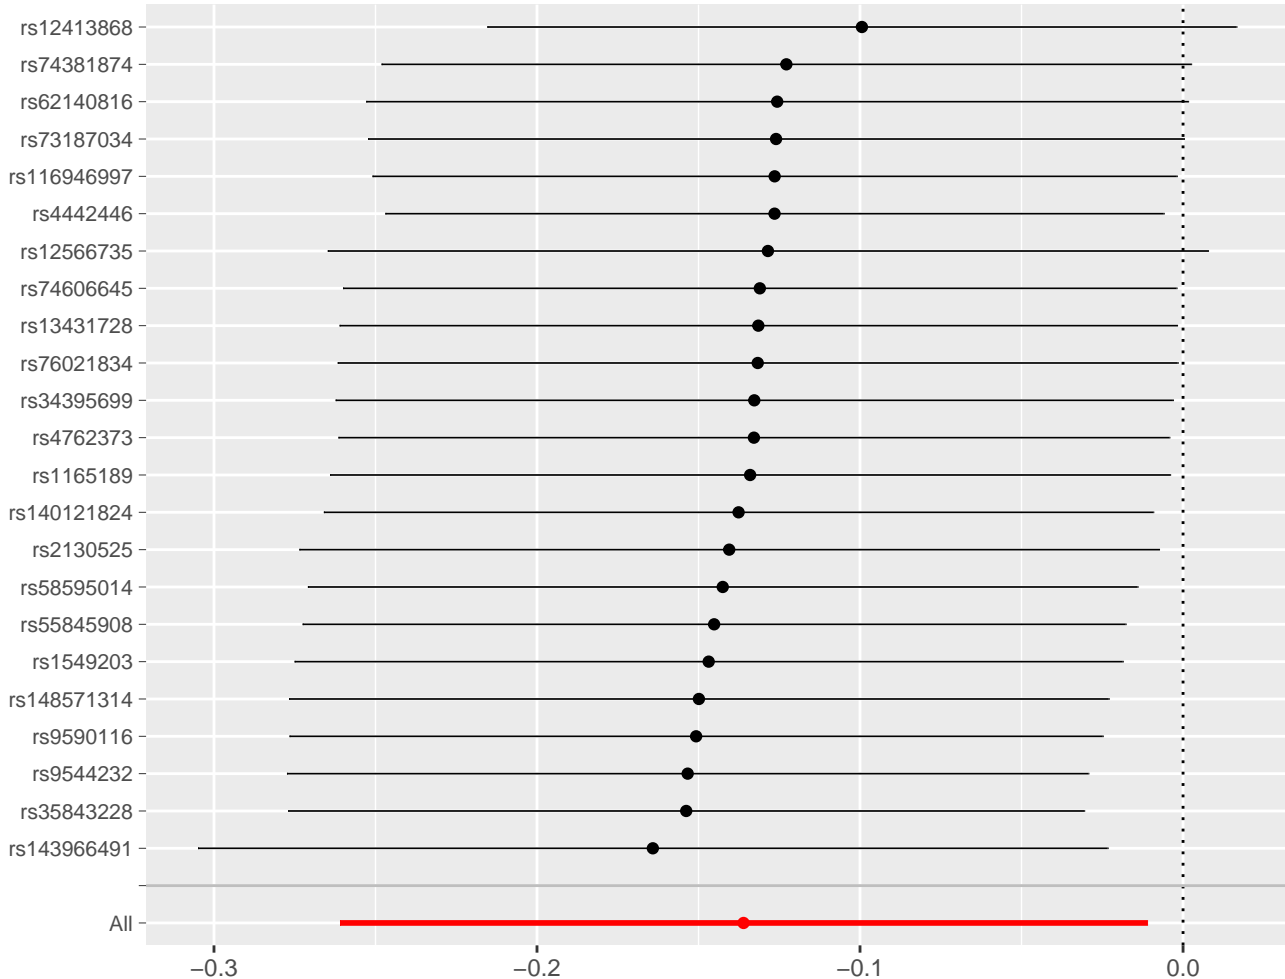

MR leave-one-out sensitivity analysis for 'Glycine conjugate of C10H14O2 (1) levels' on 'DERMATOPHYTOSIS'

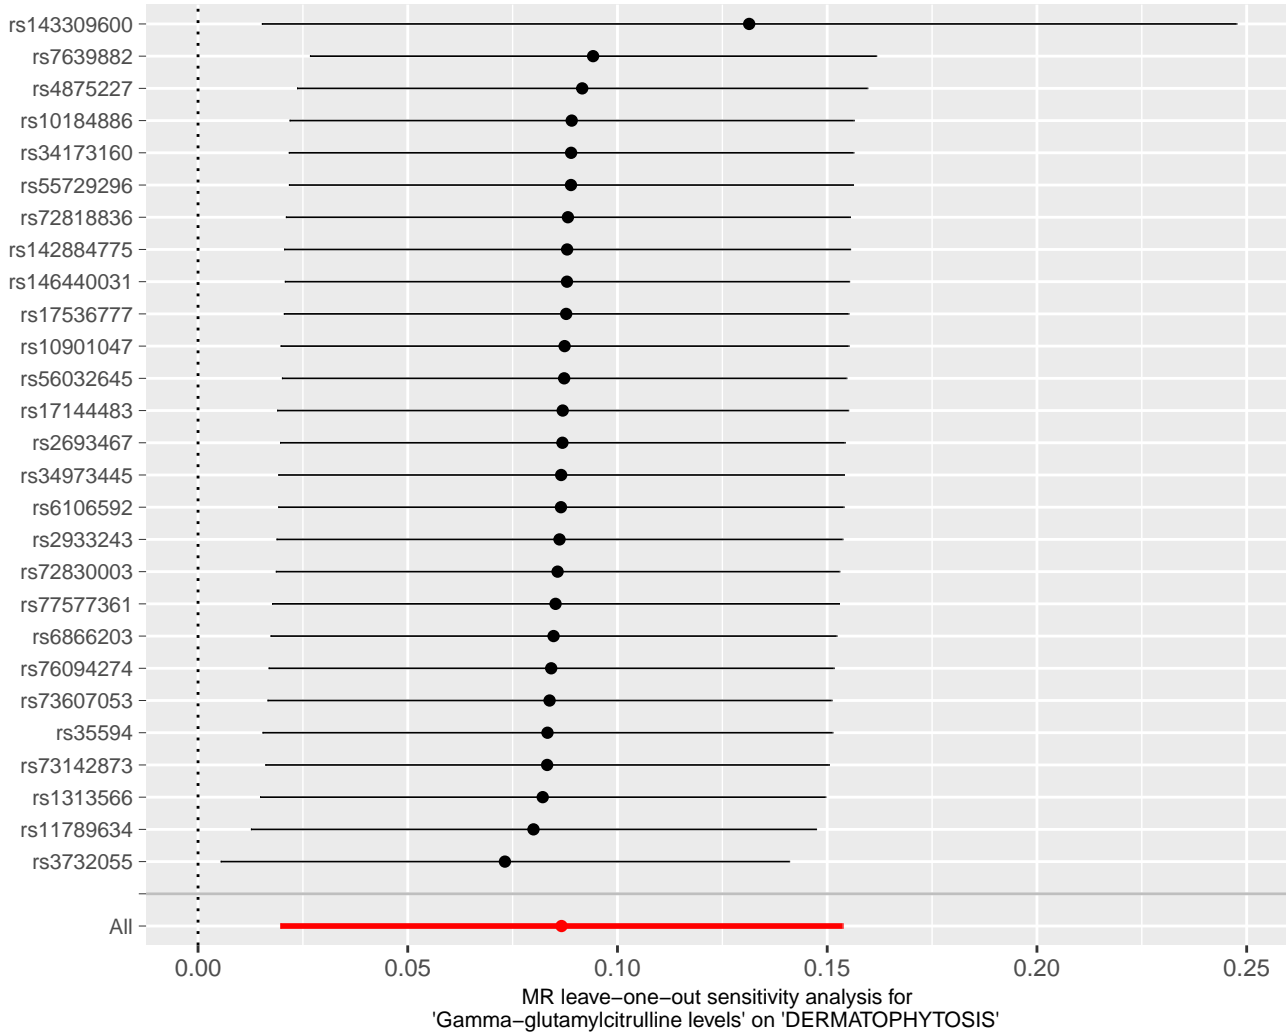

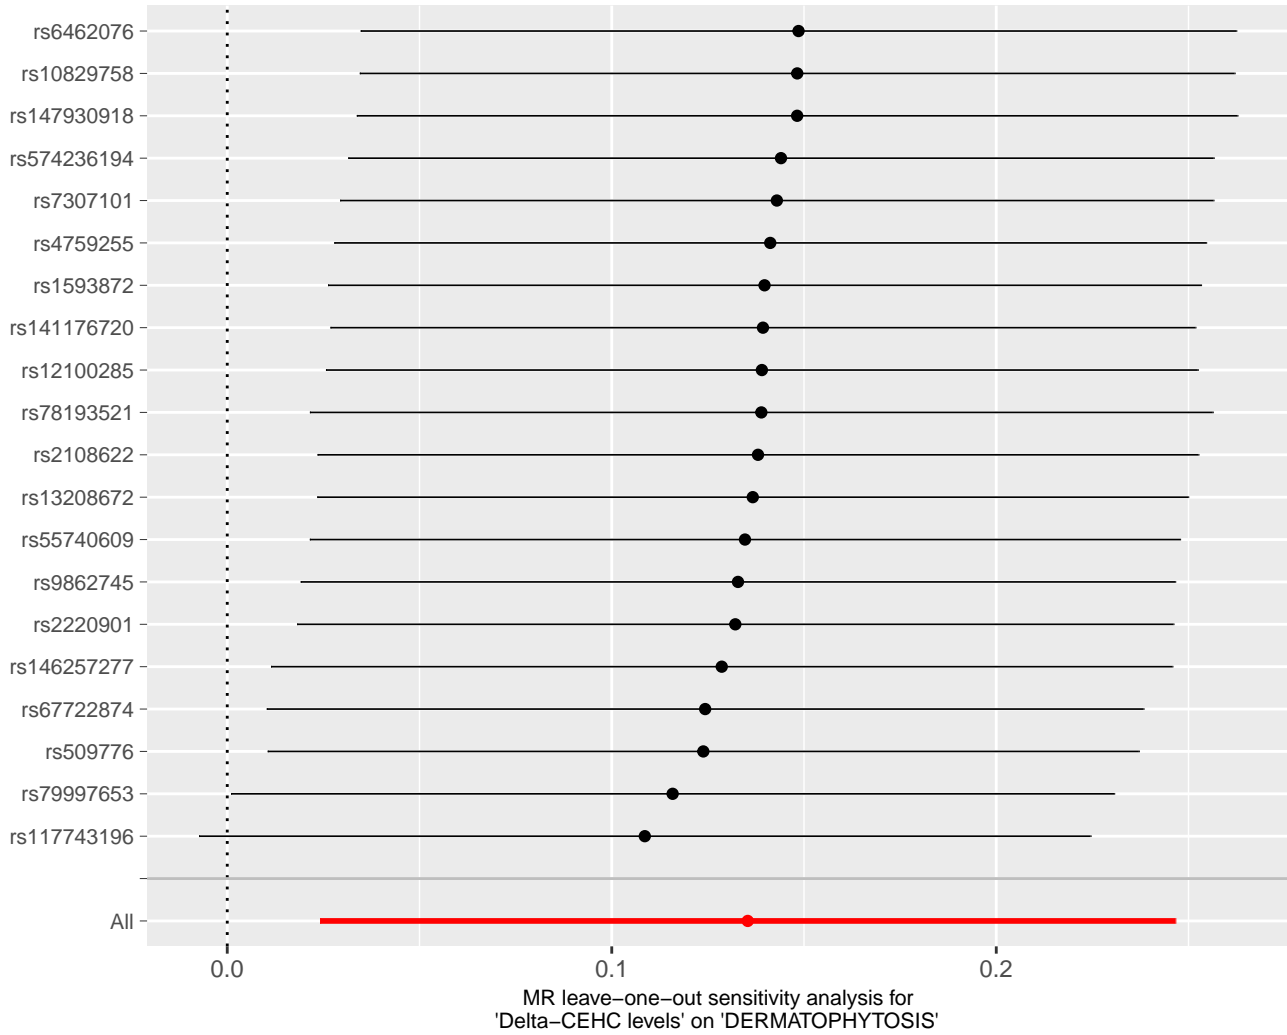

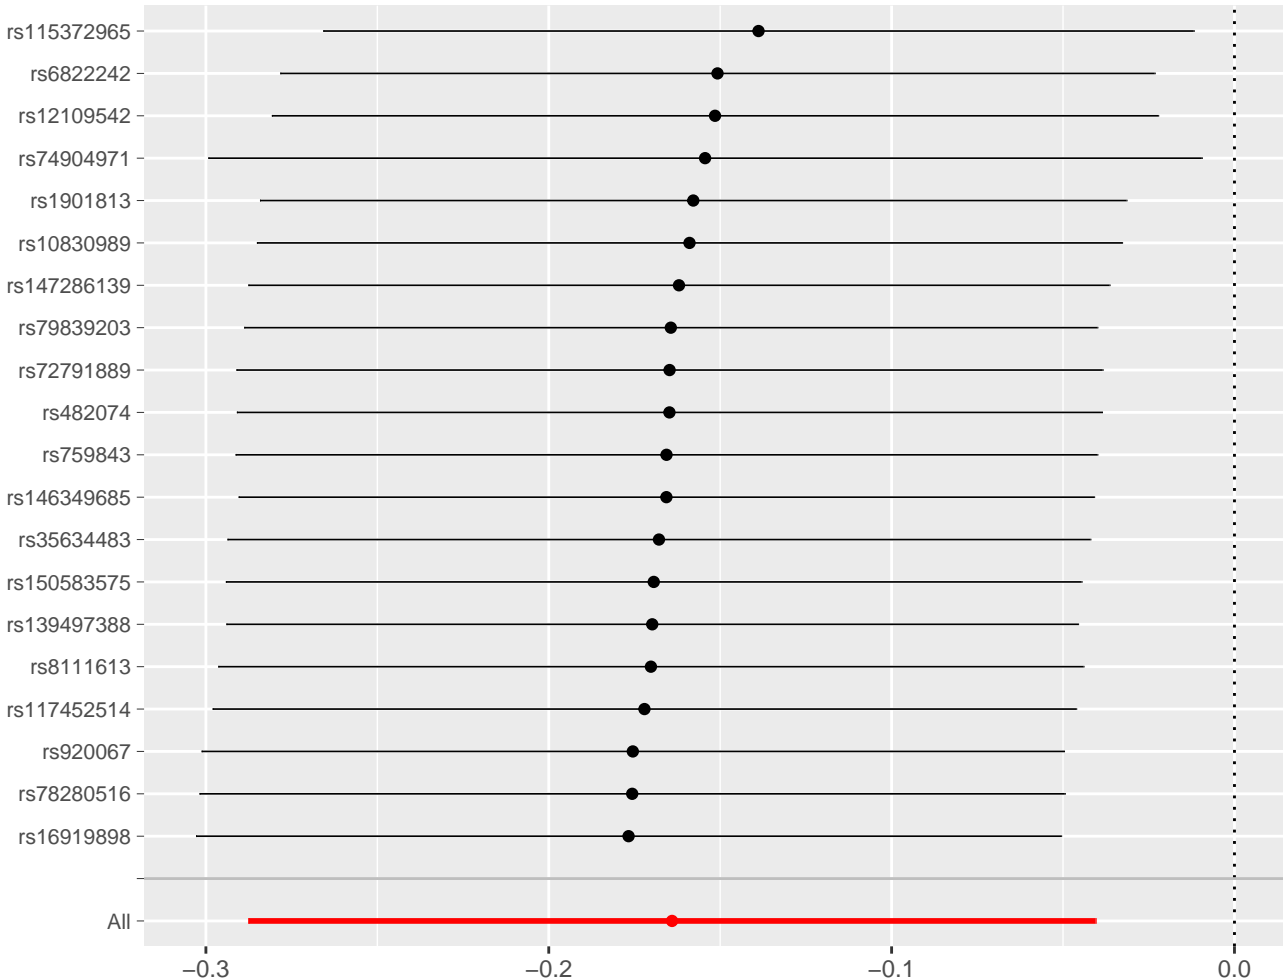

MR leave-one-out sensitivity analysis for '3,5-dichloro-2,6-dihydroxybenzoic acid levels' on 'DERMATOPHYTOSIS'

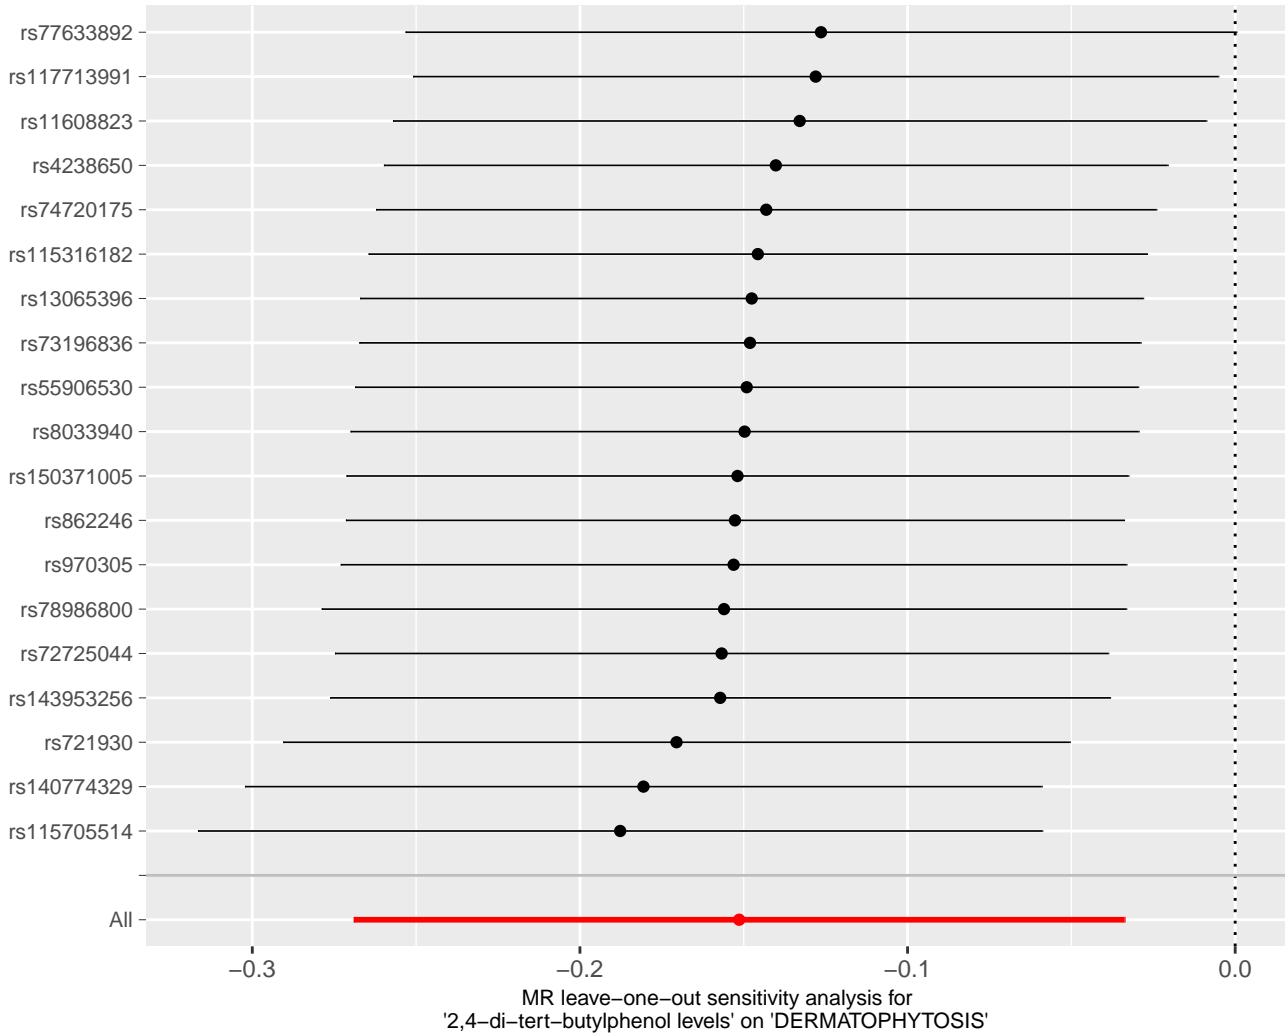

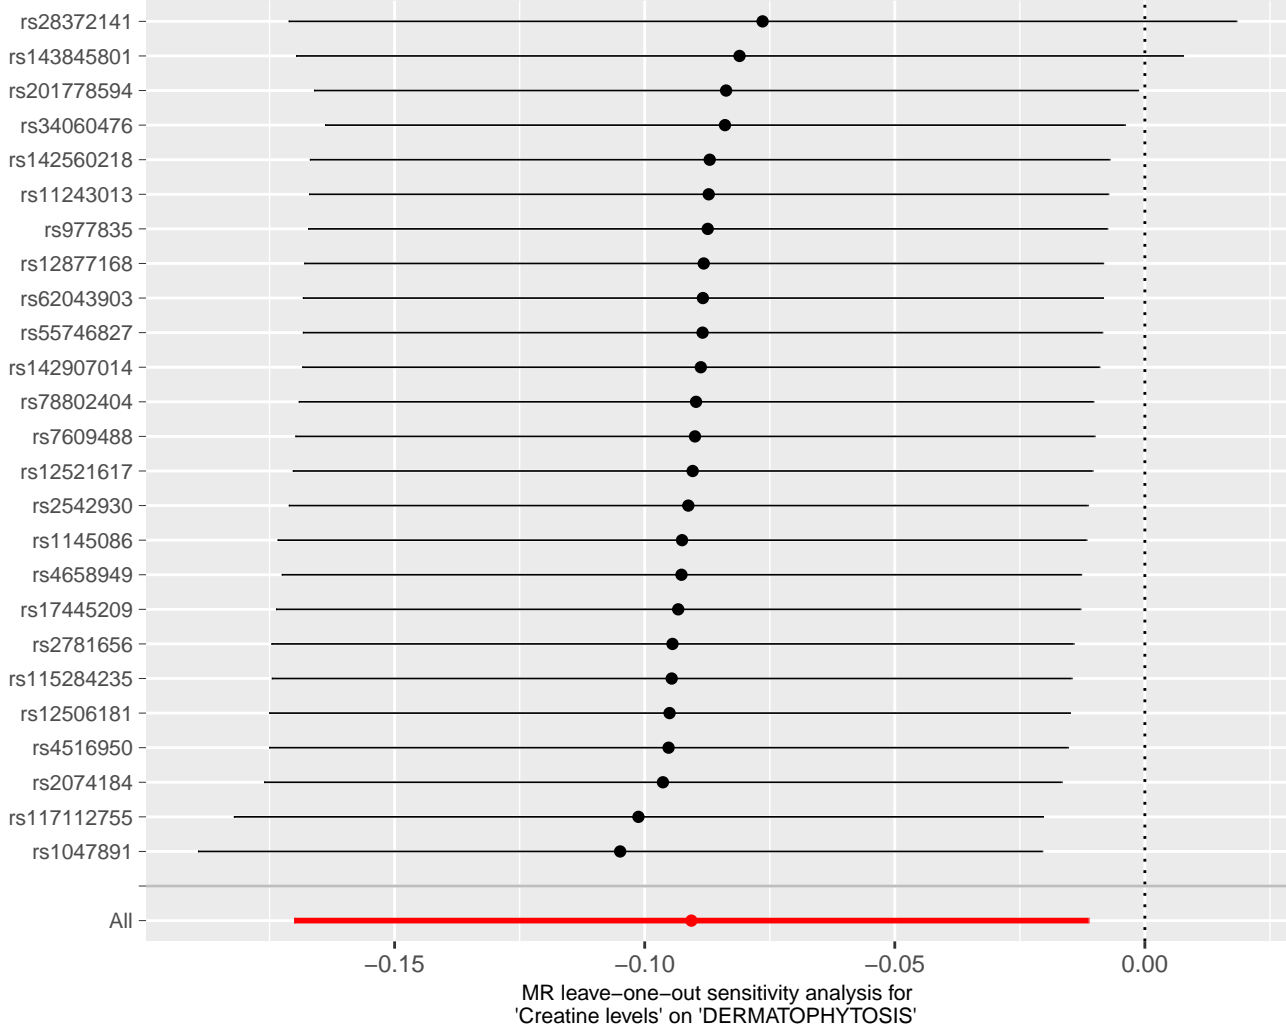

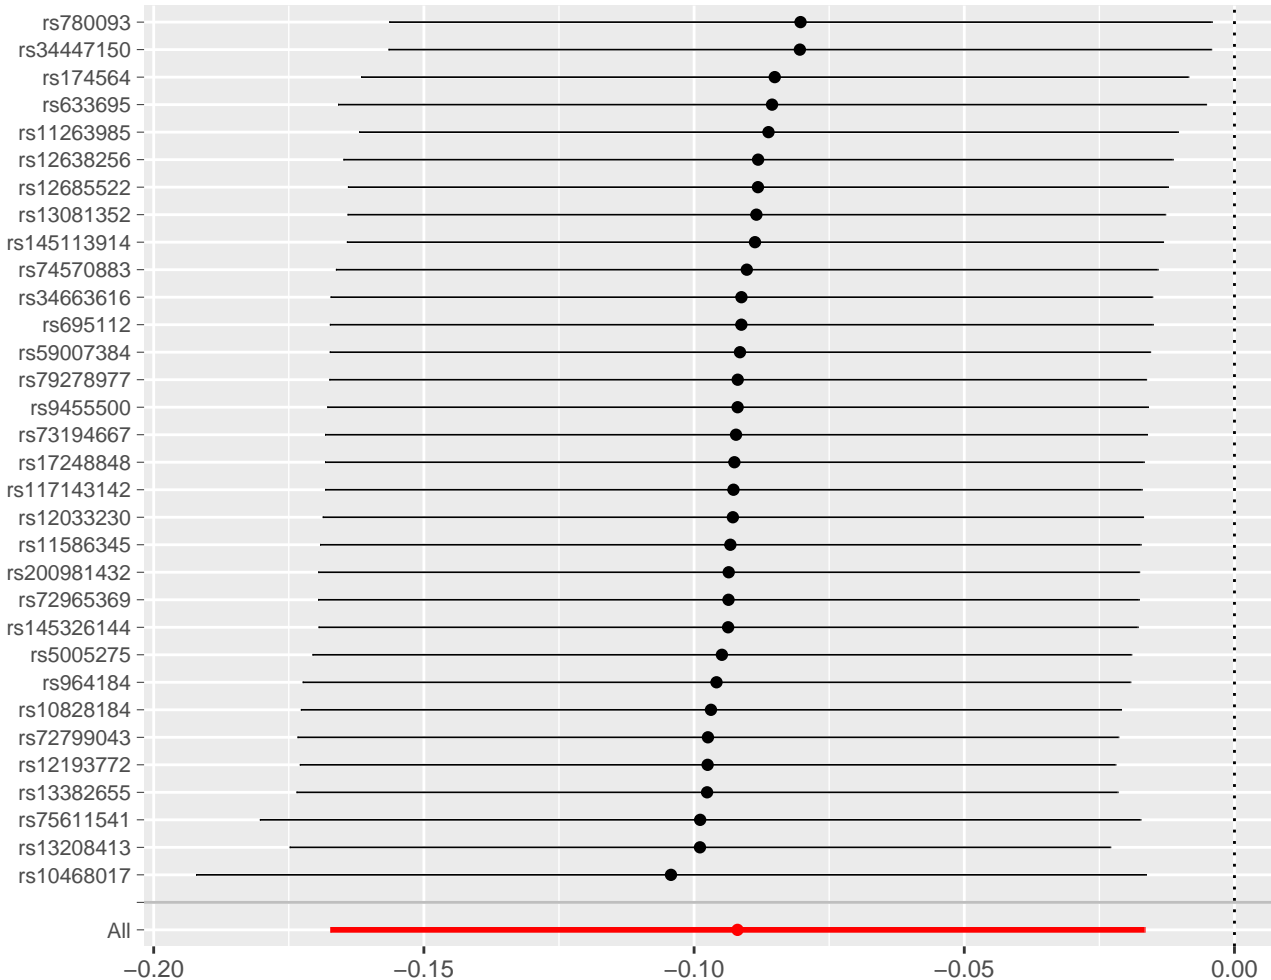

MR leave-one-out sensitivity analysis for '1-palmitoyl-2-oleoyl-GPE (16:0/18:1) levels' on 'DERMATOPHYTOSIS'

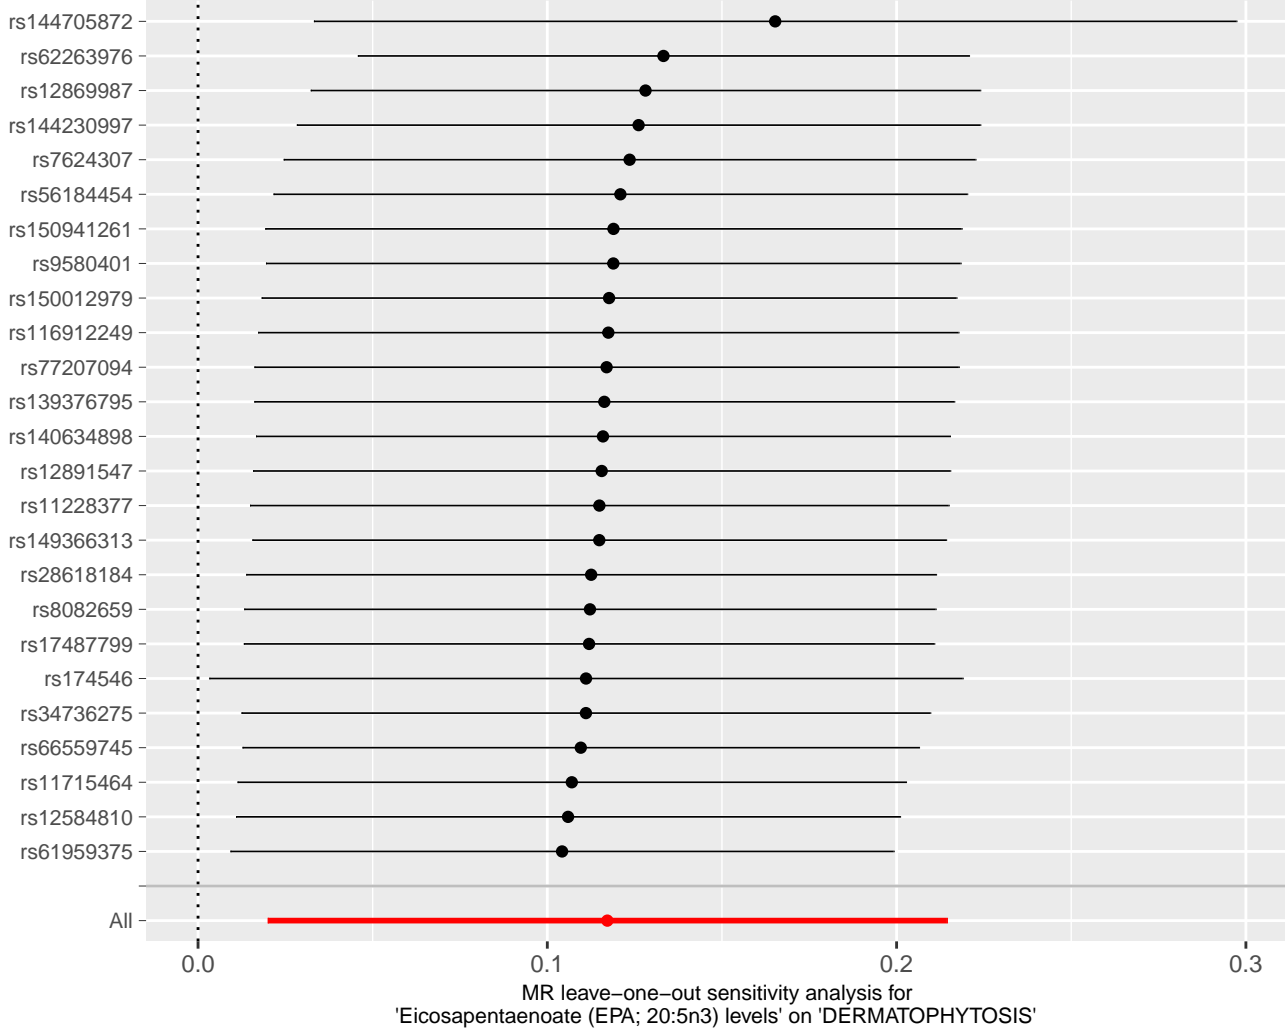

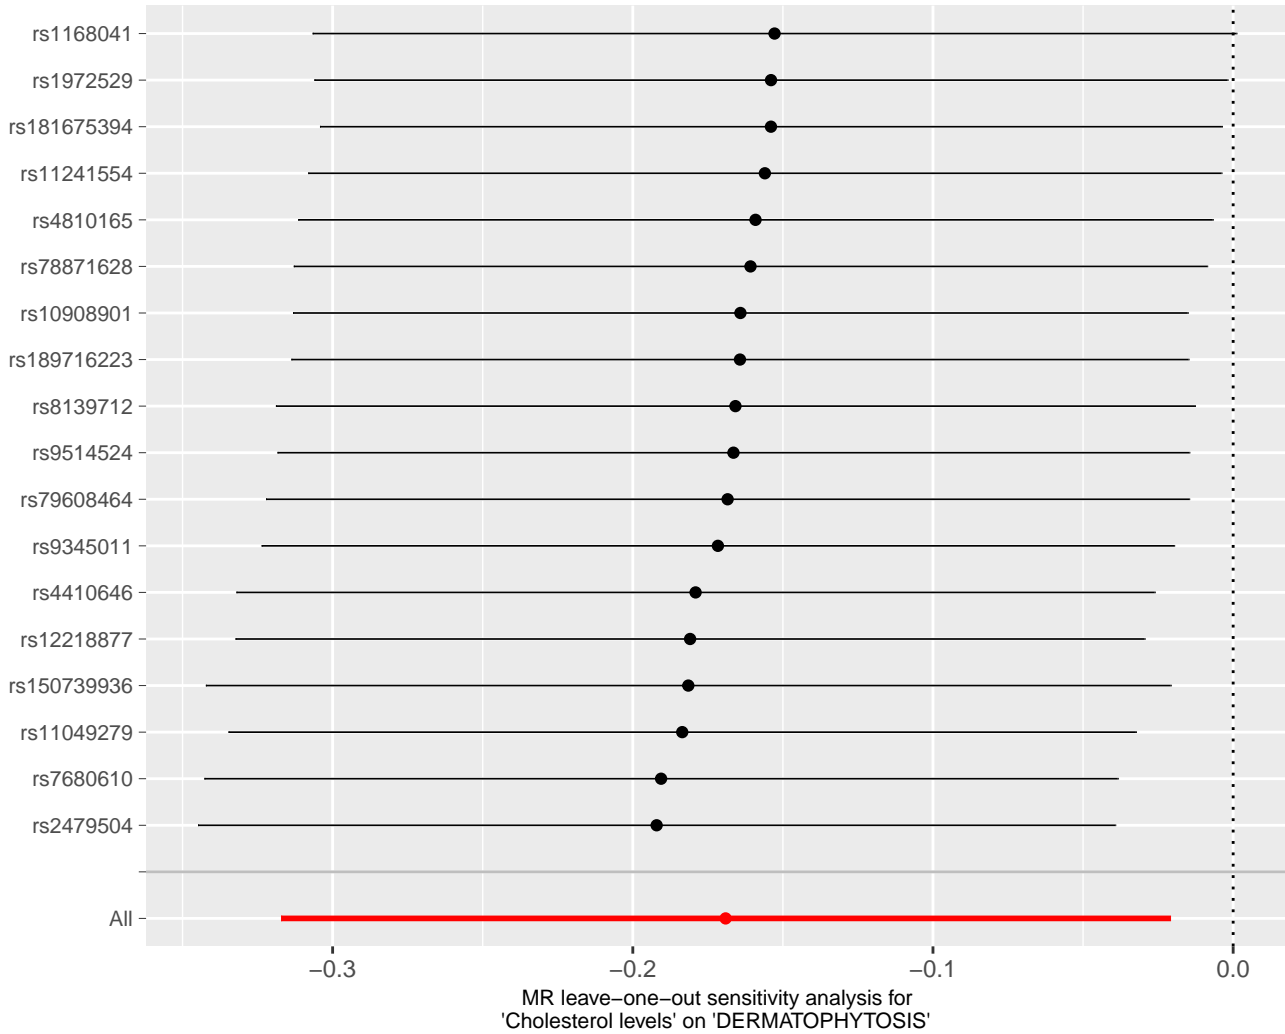

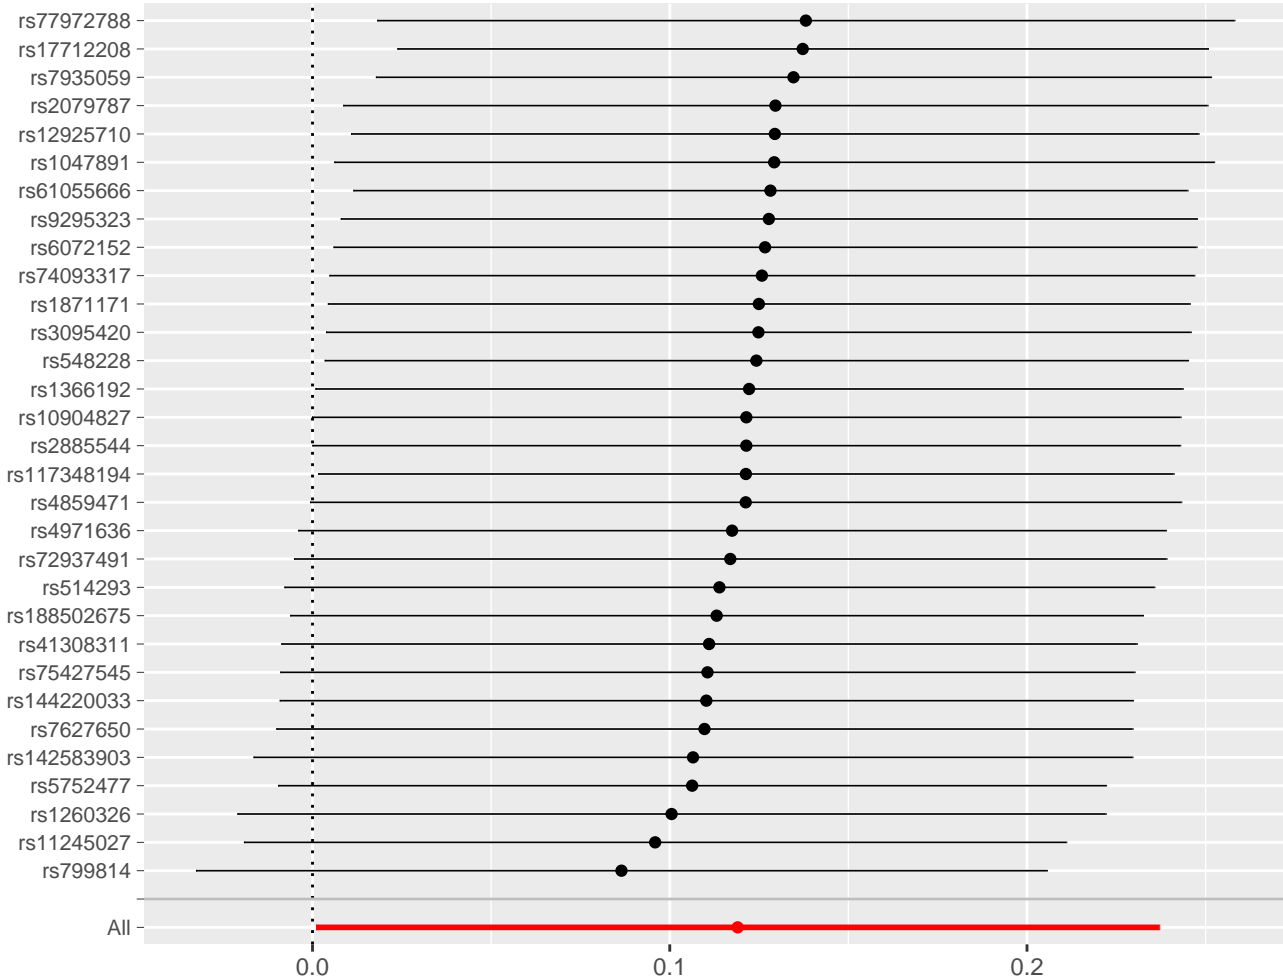

MR leave-one-out sensitivity analysis for 'Threonine levels' on 'DERMATOPHYTOSIS'

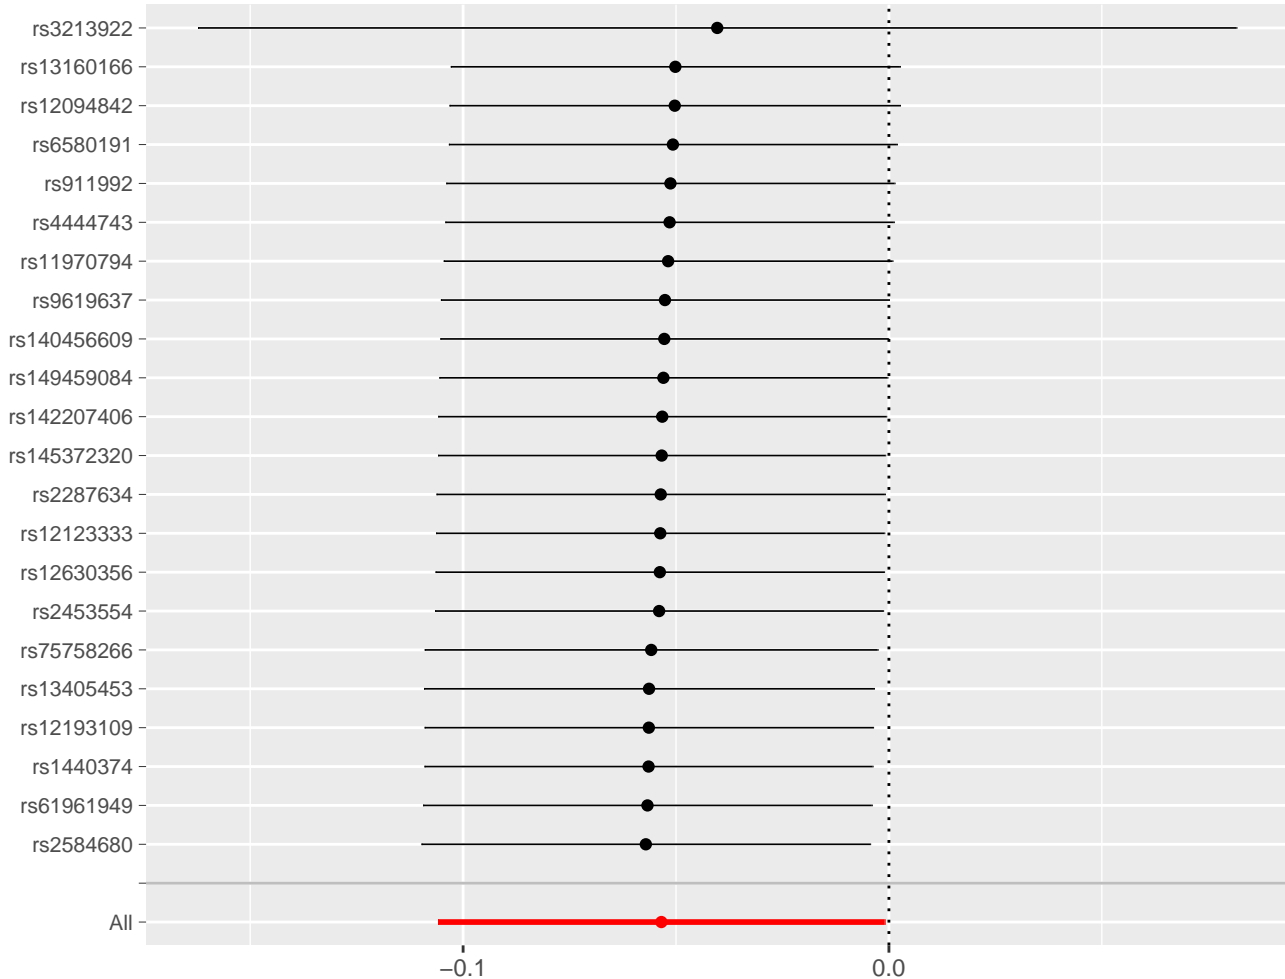

MR leave-one-out sensitivity analysis for 'Caprylate (8:0) levels' on 'DERMATOPHYTOSIS'

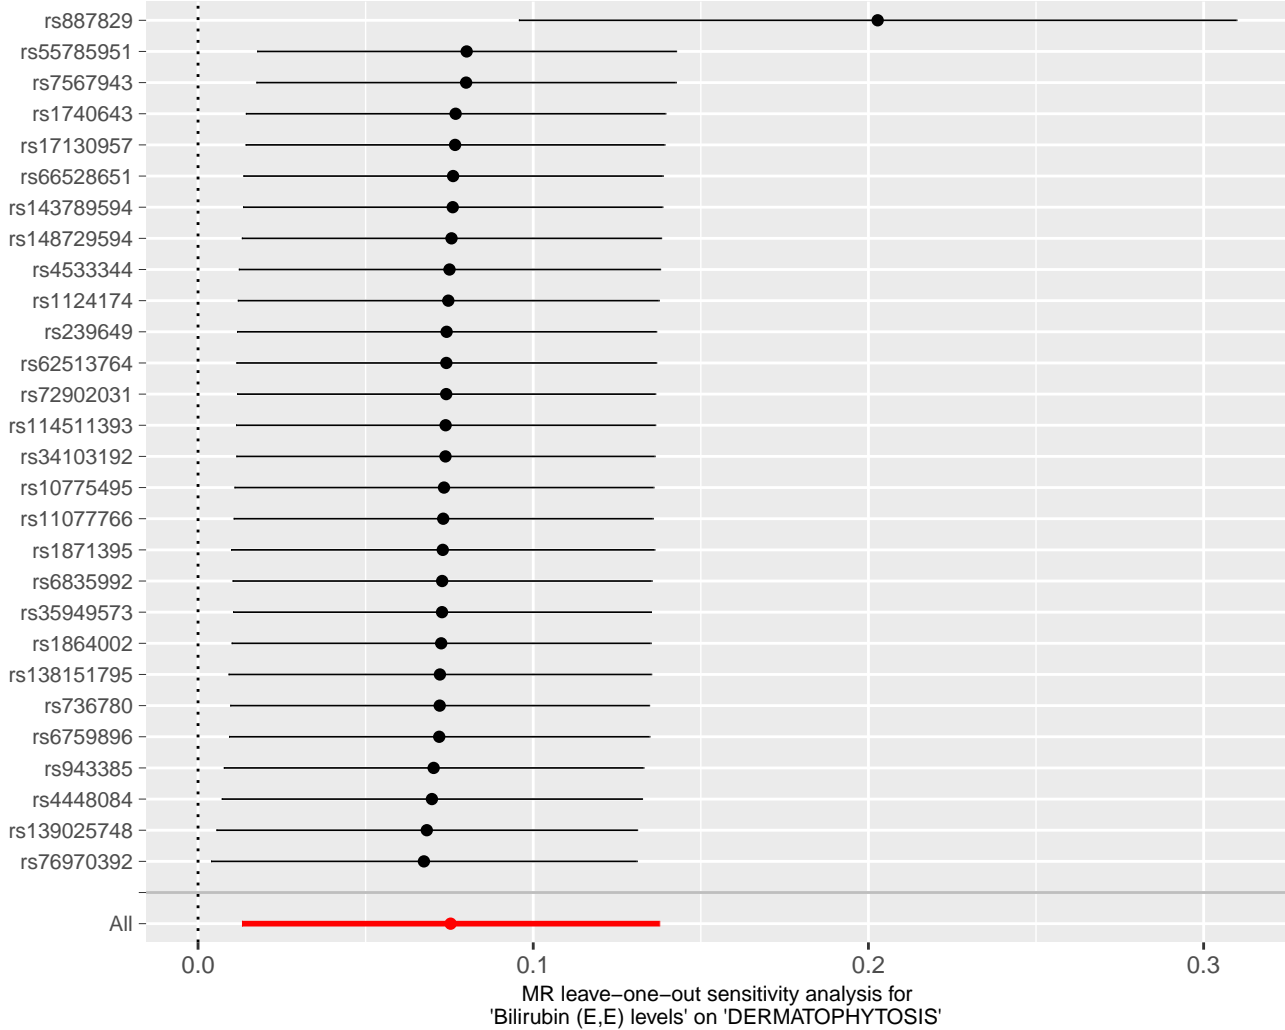

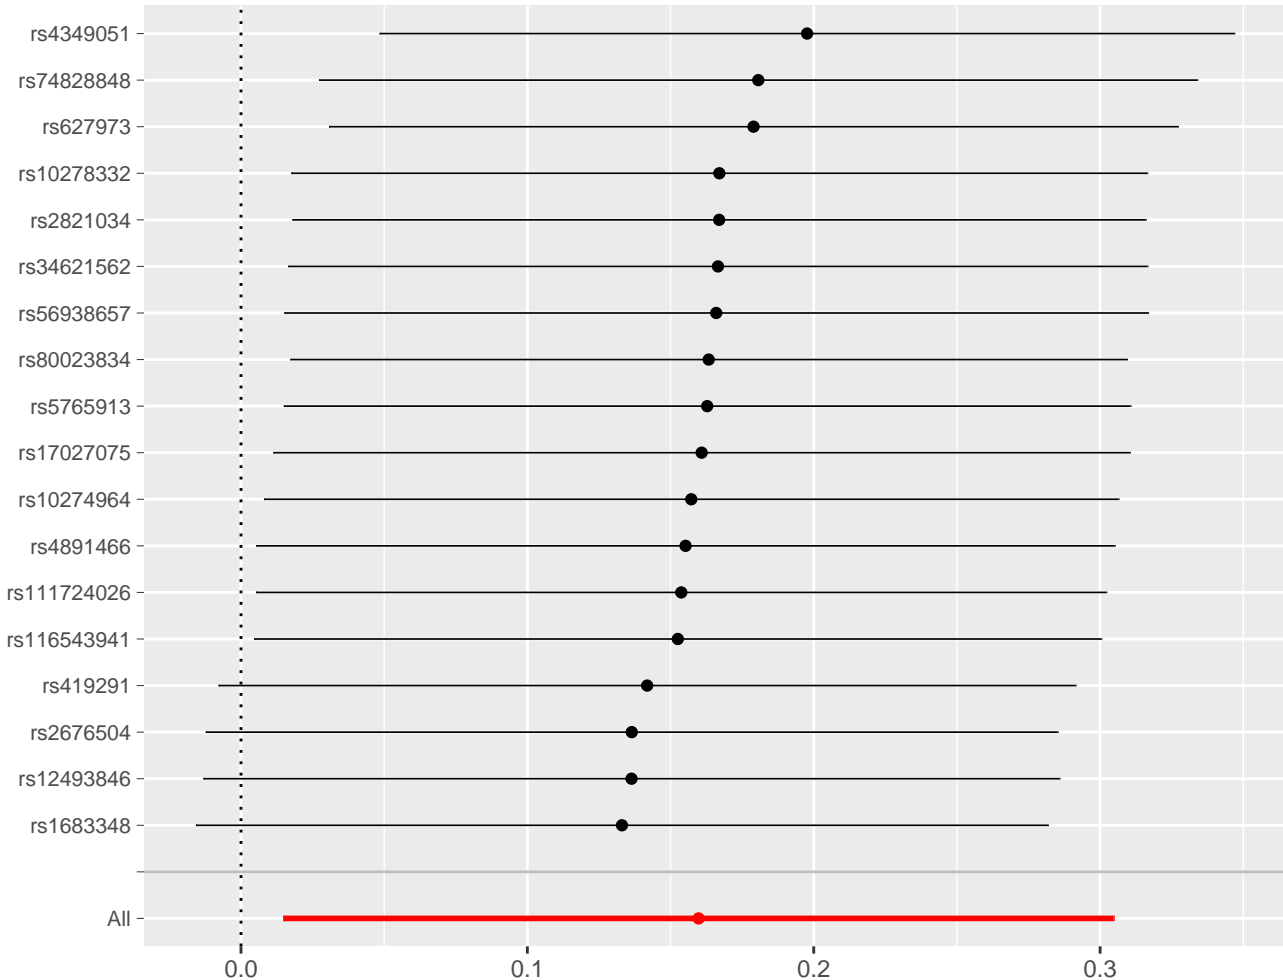

MR leave-one-out sensitivity analysis for 'Adenosine 5'-monophosphate (AMP) to palmitate (16:0) ratio' on 'DERMATOPHYTOSIS'

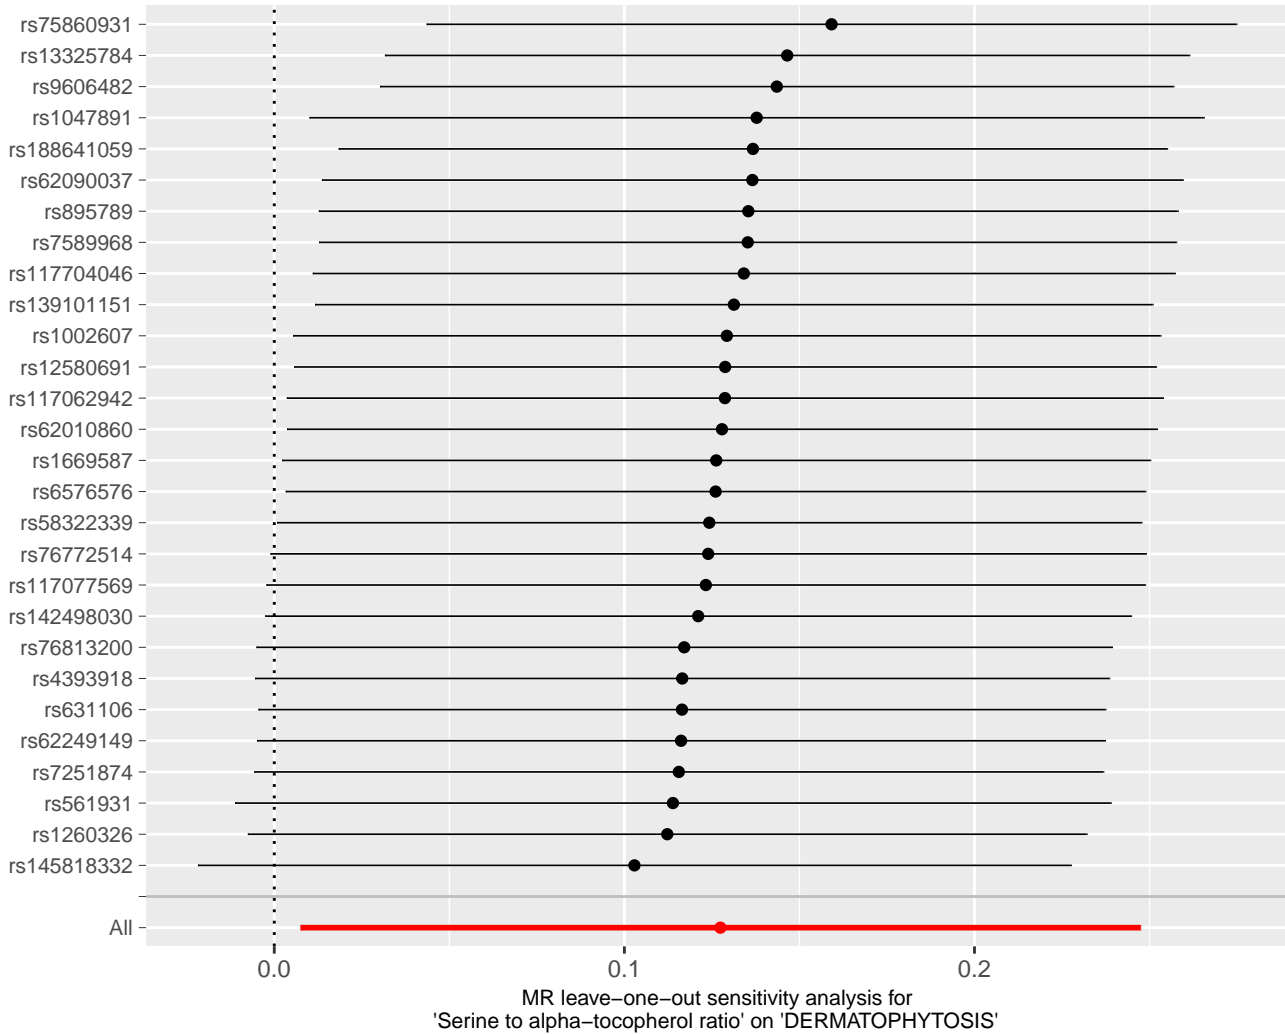

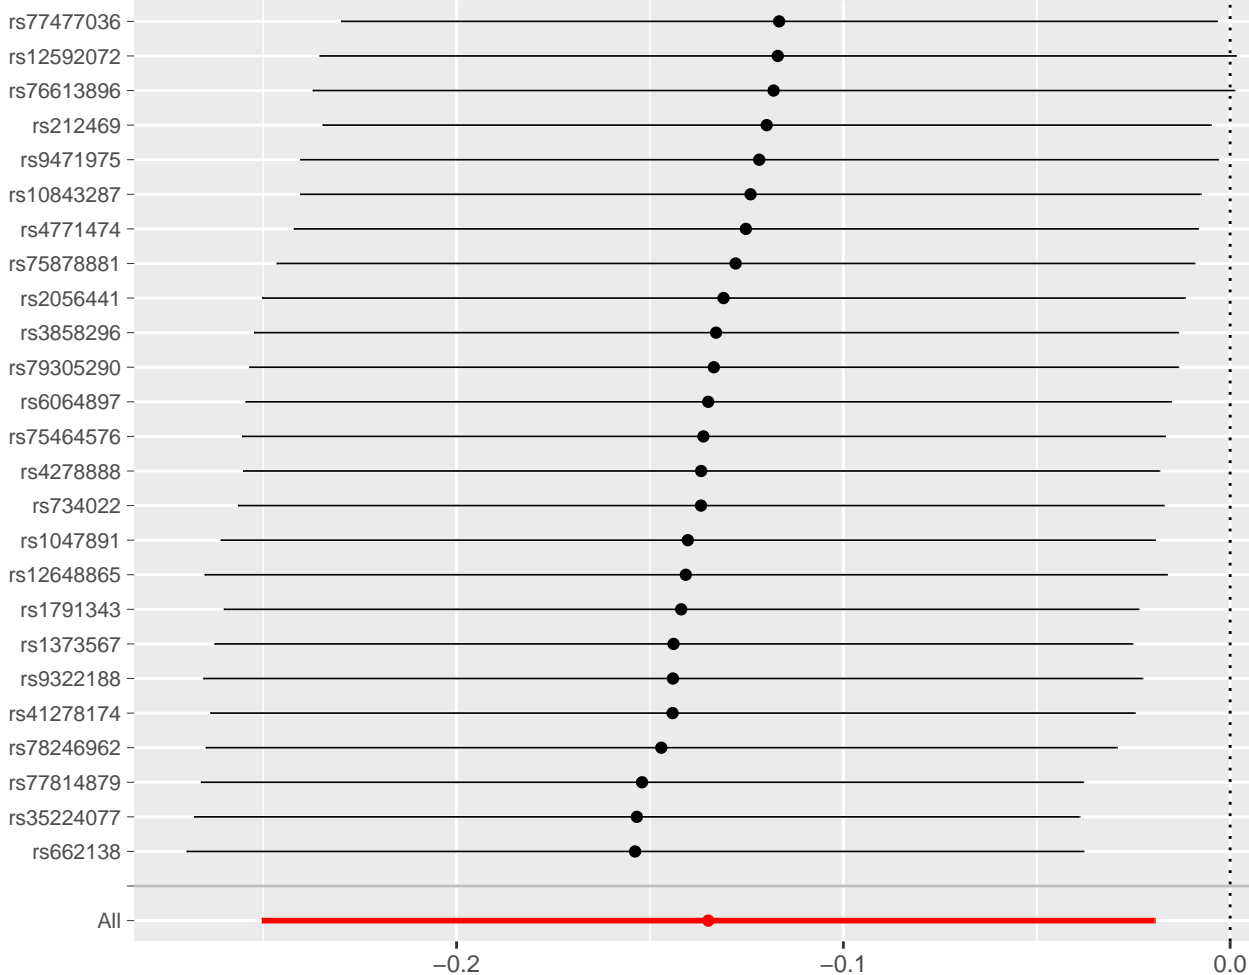

MR leave-one-out sensitivity analysis for  
'5-methylthioadenosine (MTA) to phosphate ratio' on 'DERMATOPHYTOSIS'

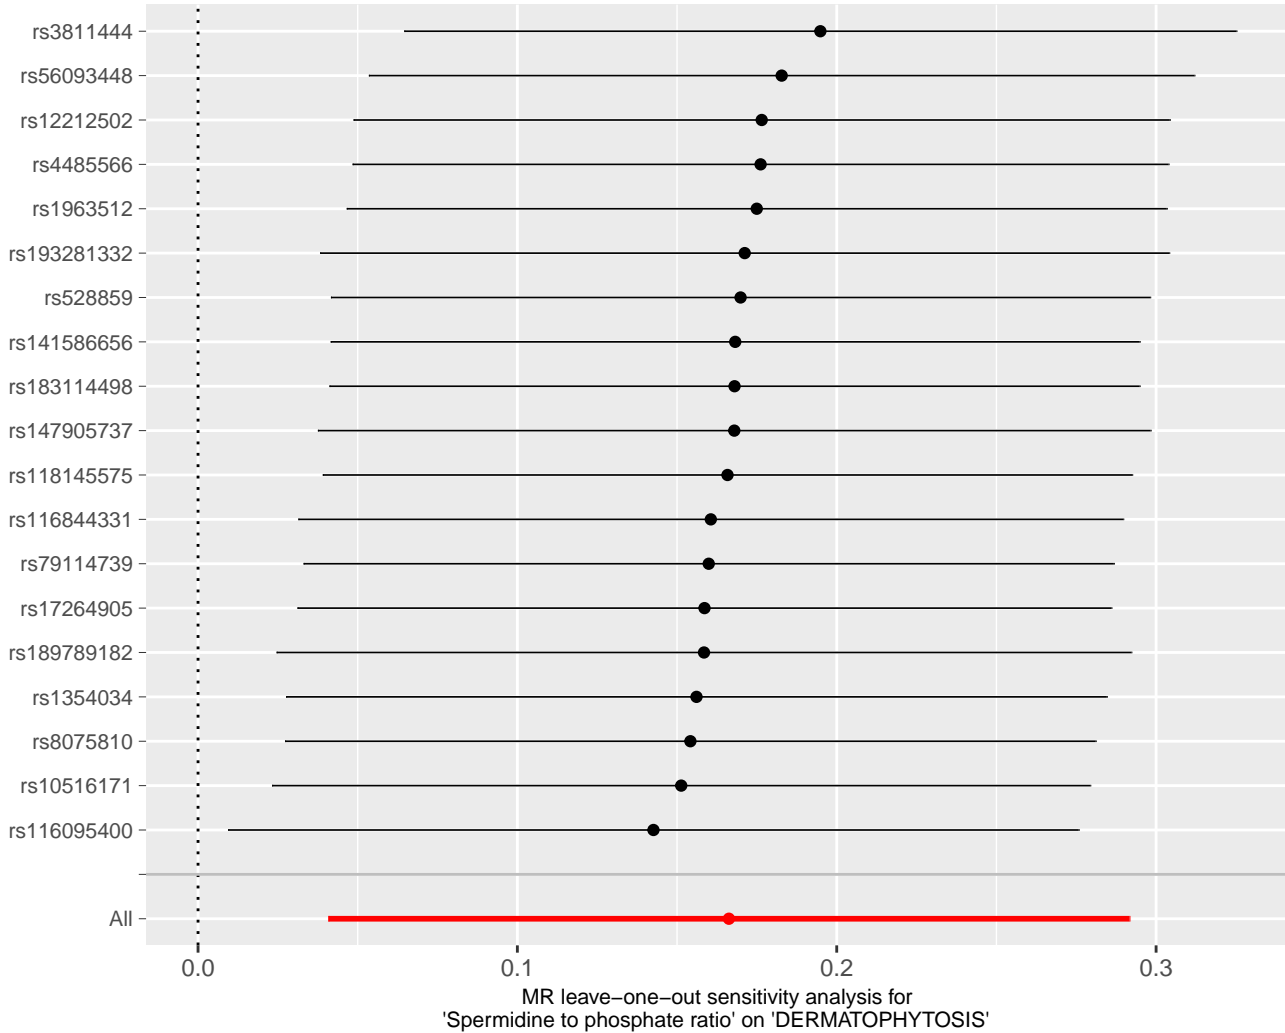

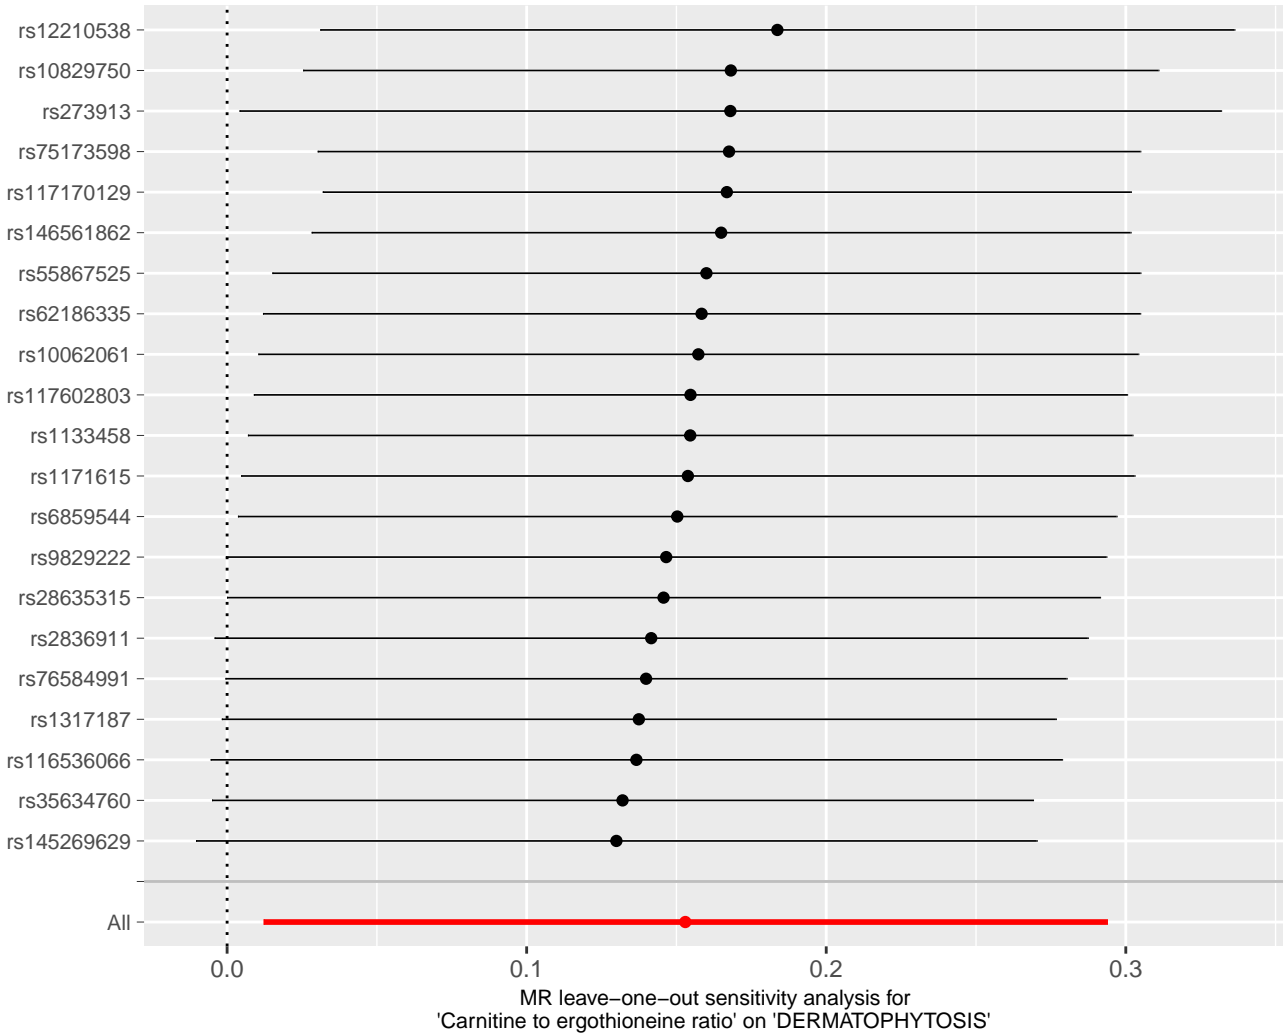

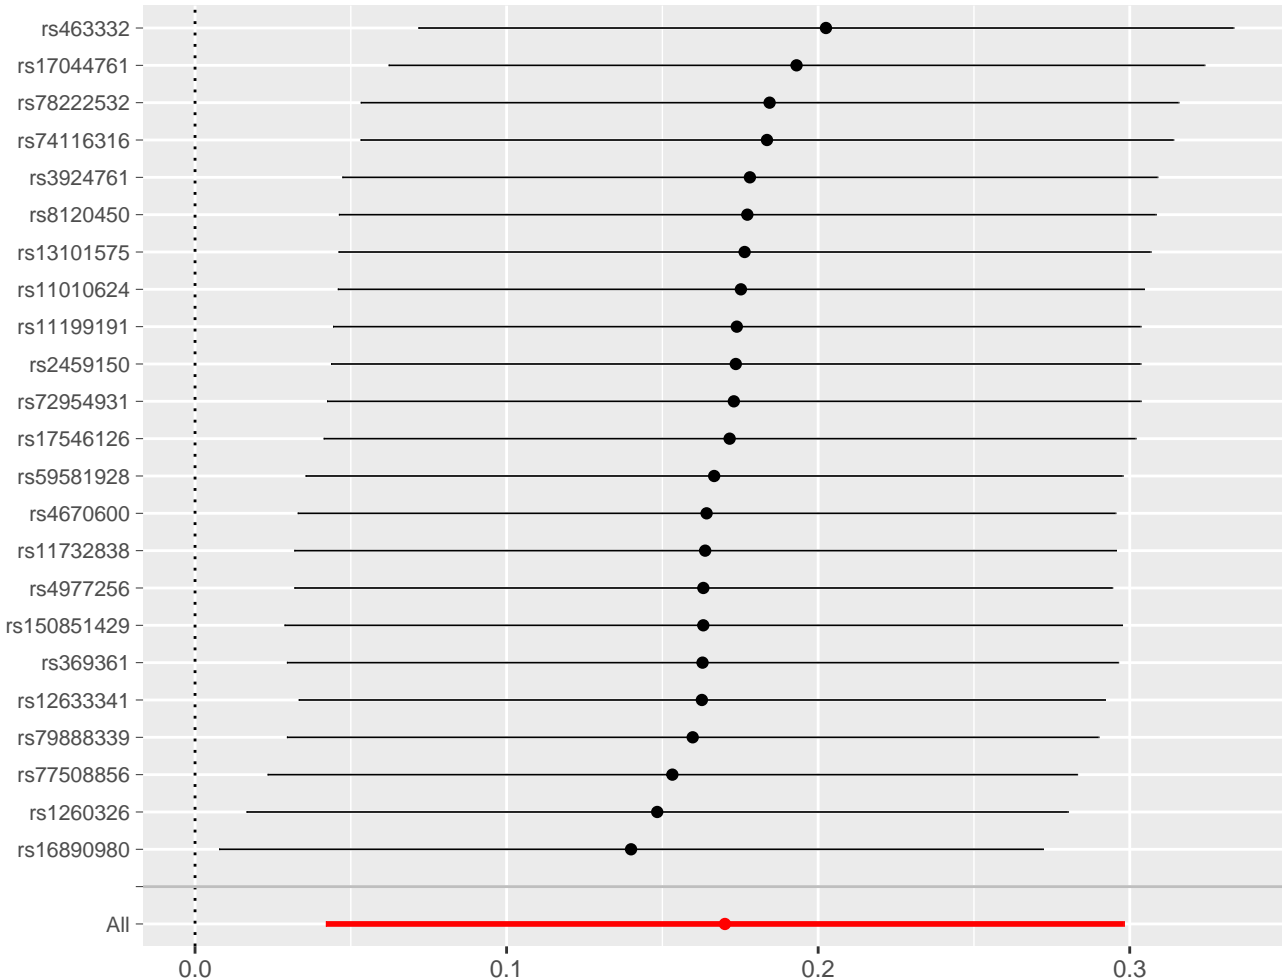

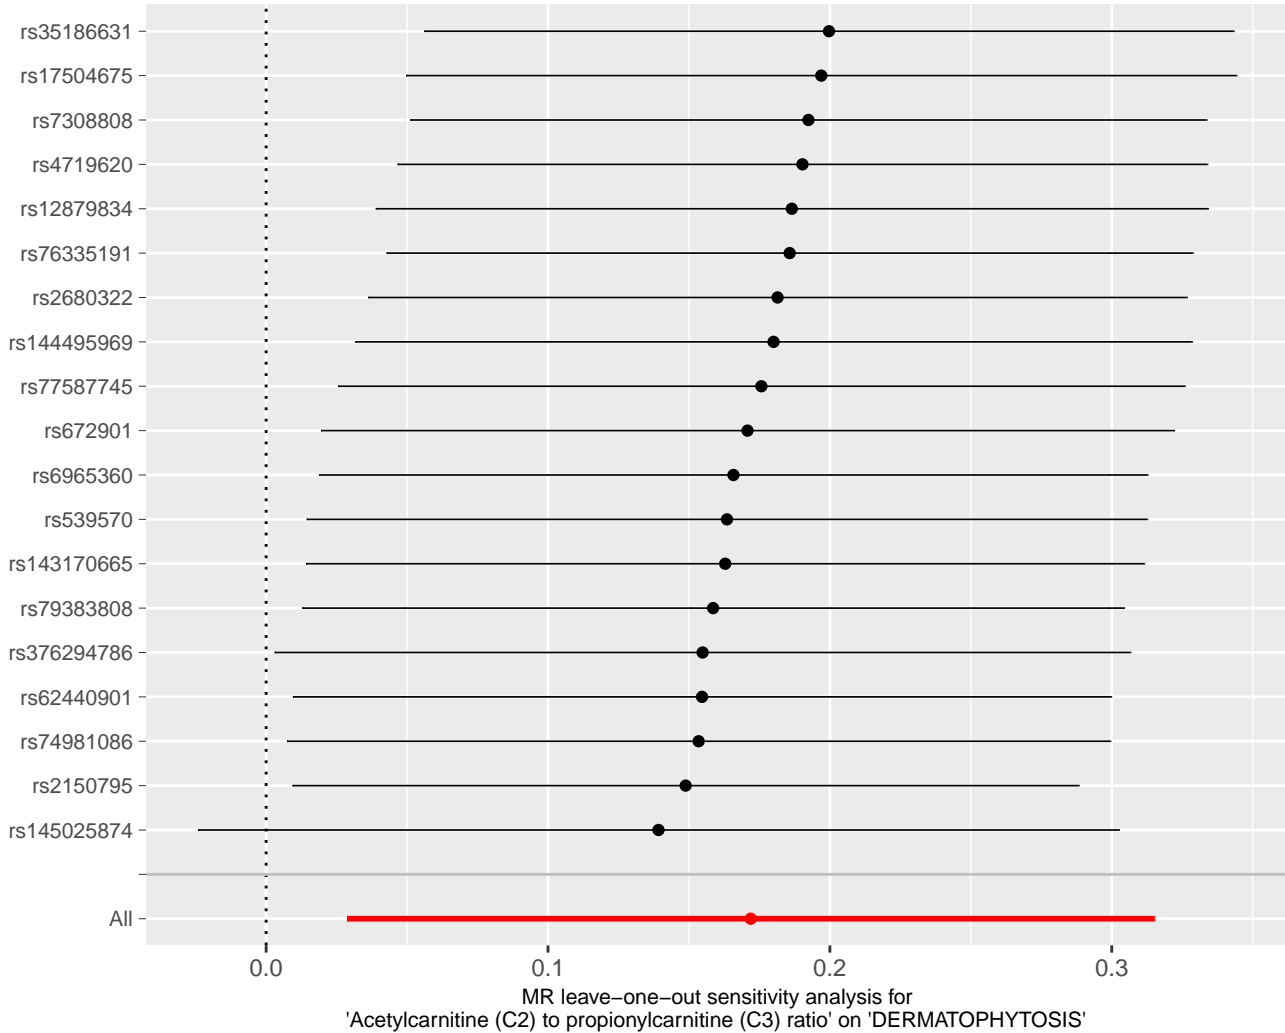

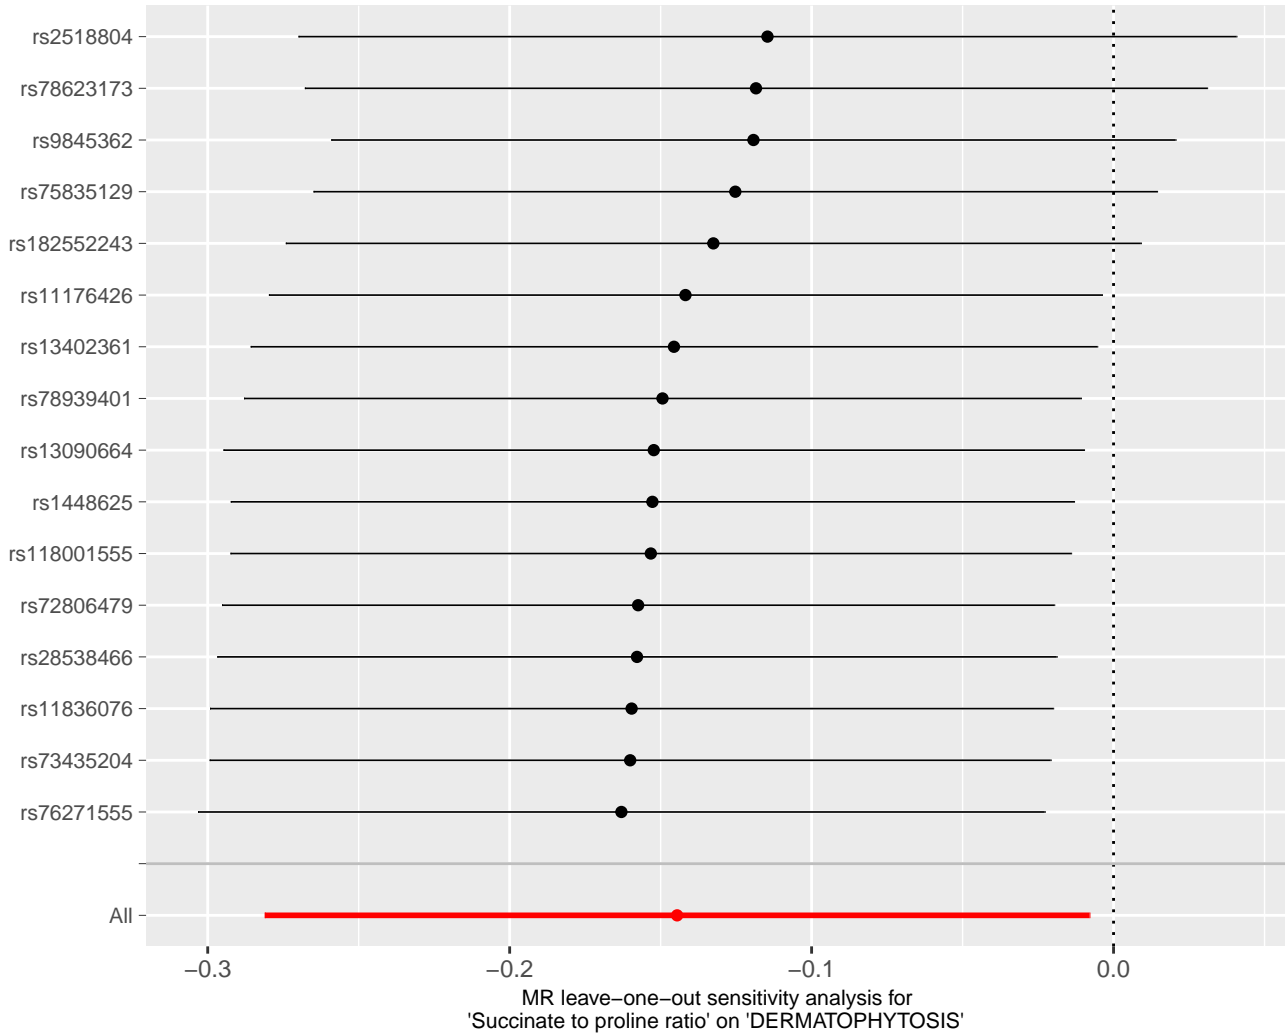

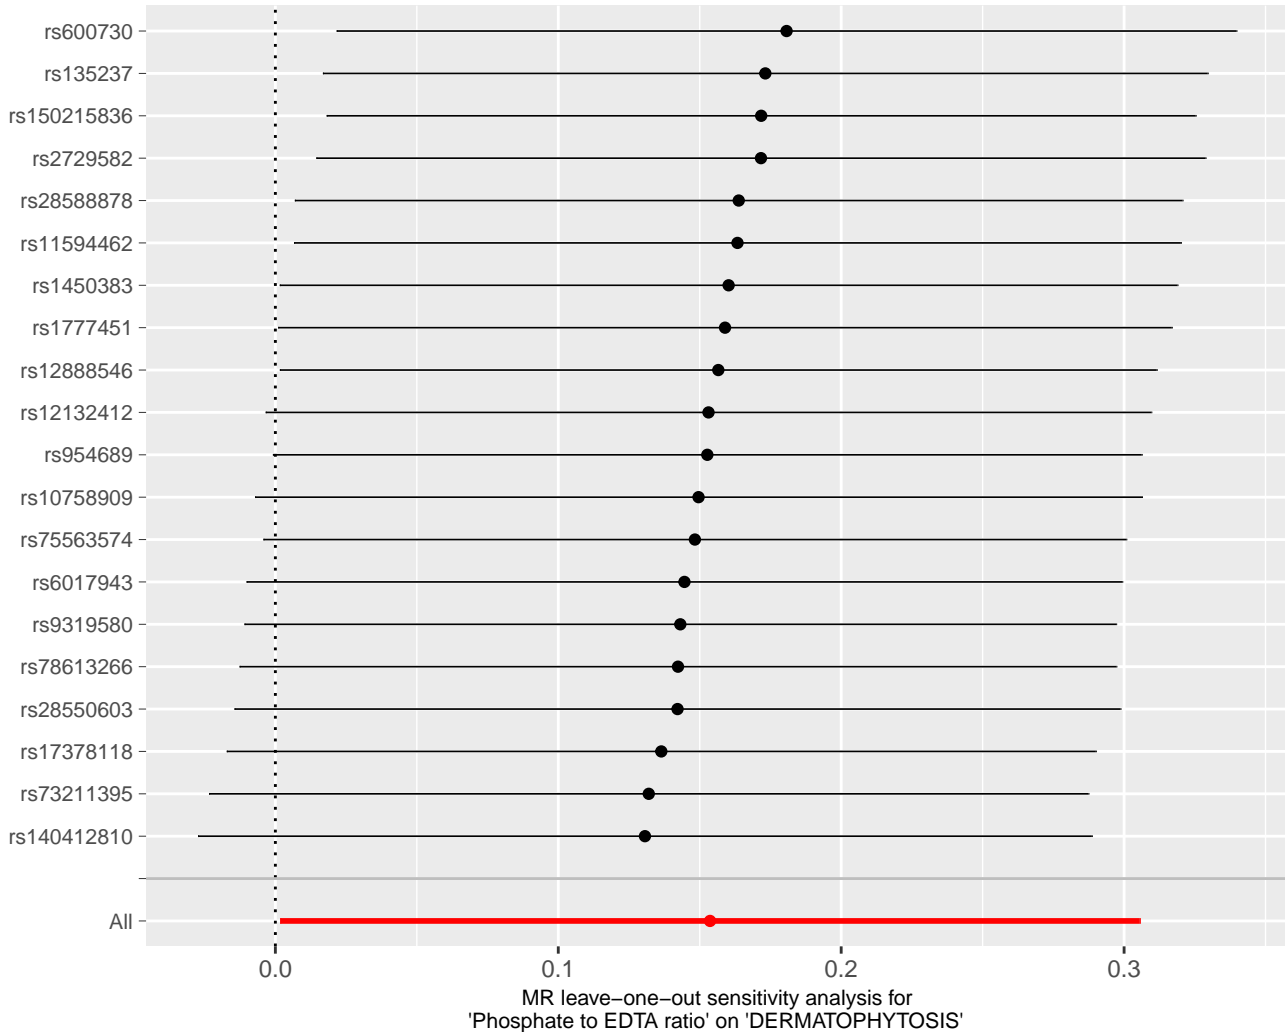

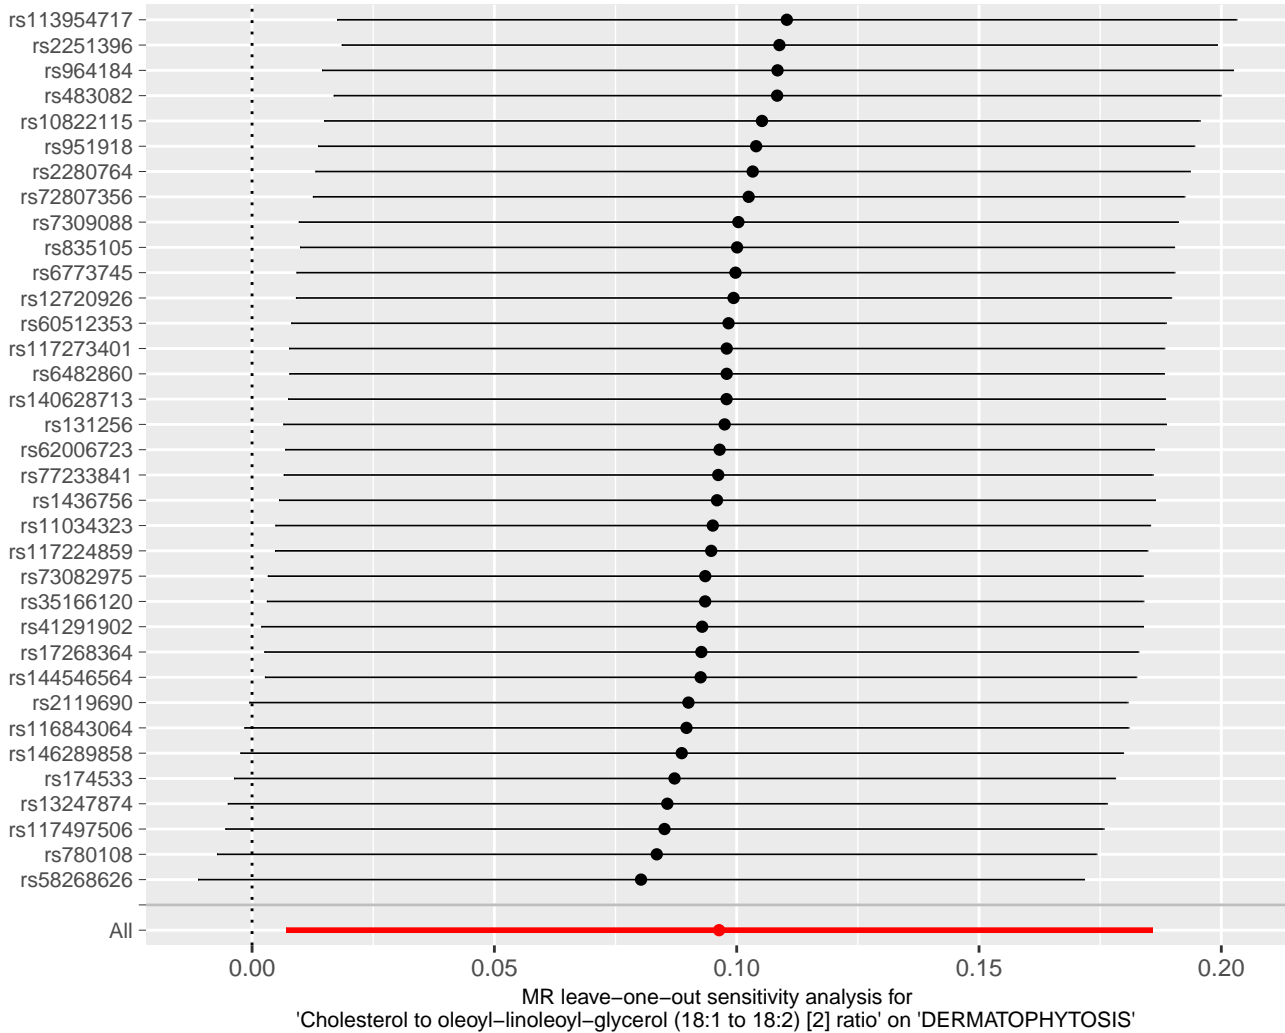

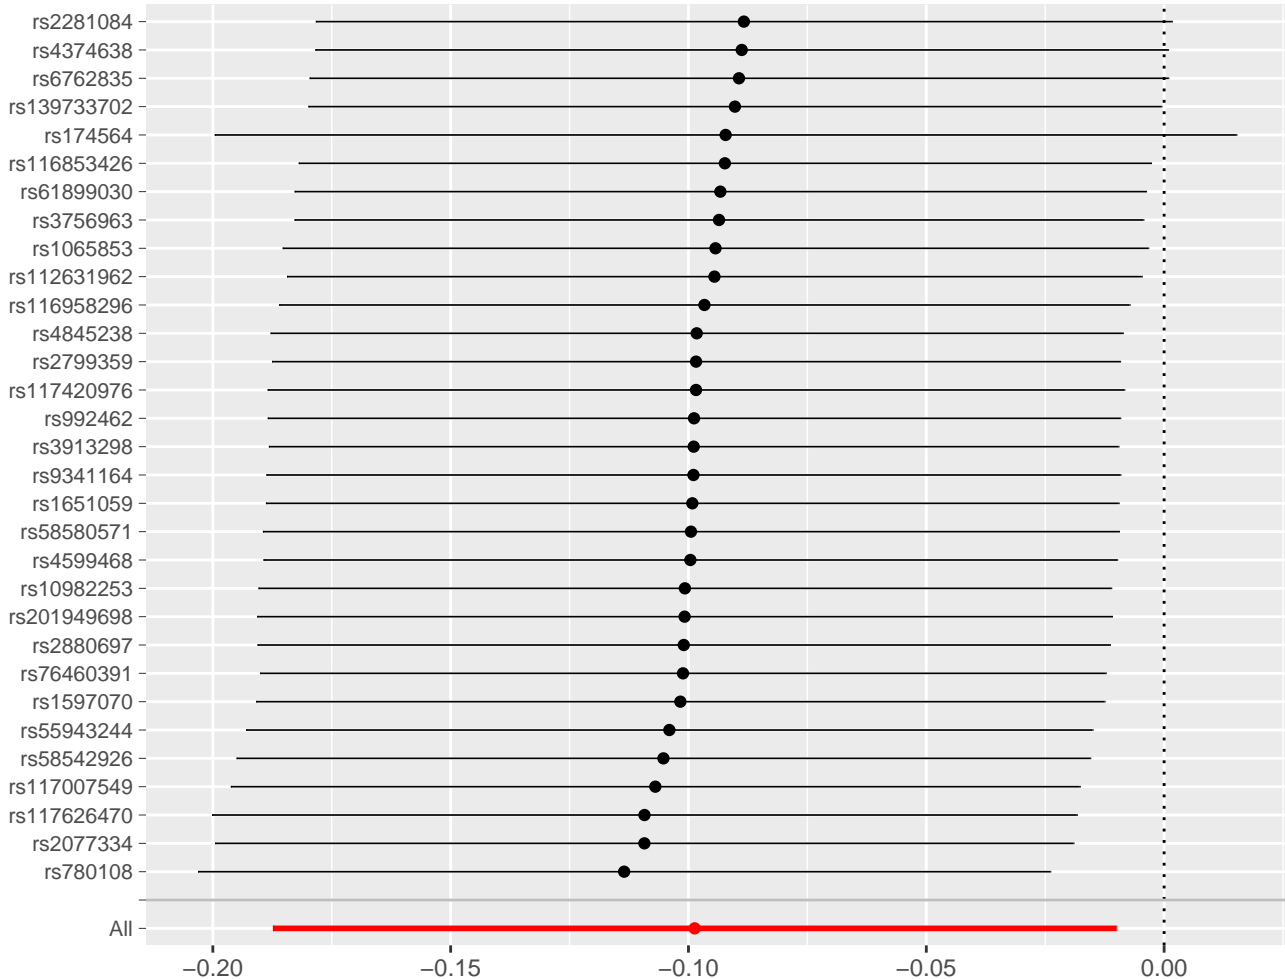

MR leave-one-out sensitivity analysis for  
'Cholesterol to linoleoyl-arachidonoyl-glycerol (18:2 to 20:4) [2] ratio' on 'DERMATOPHYTOSIS'

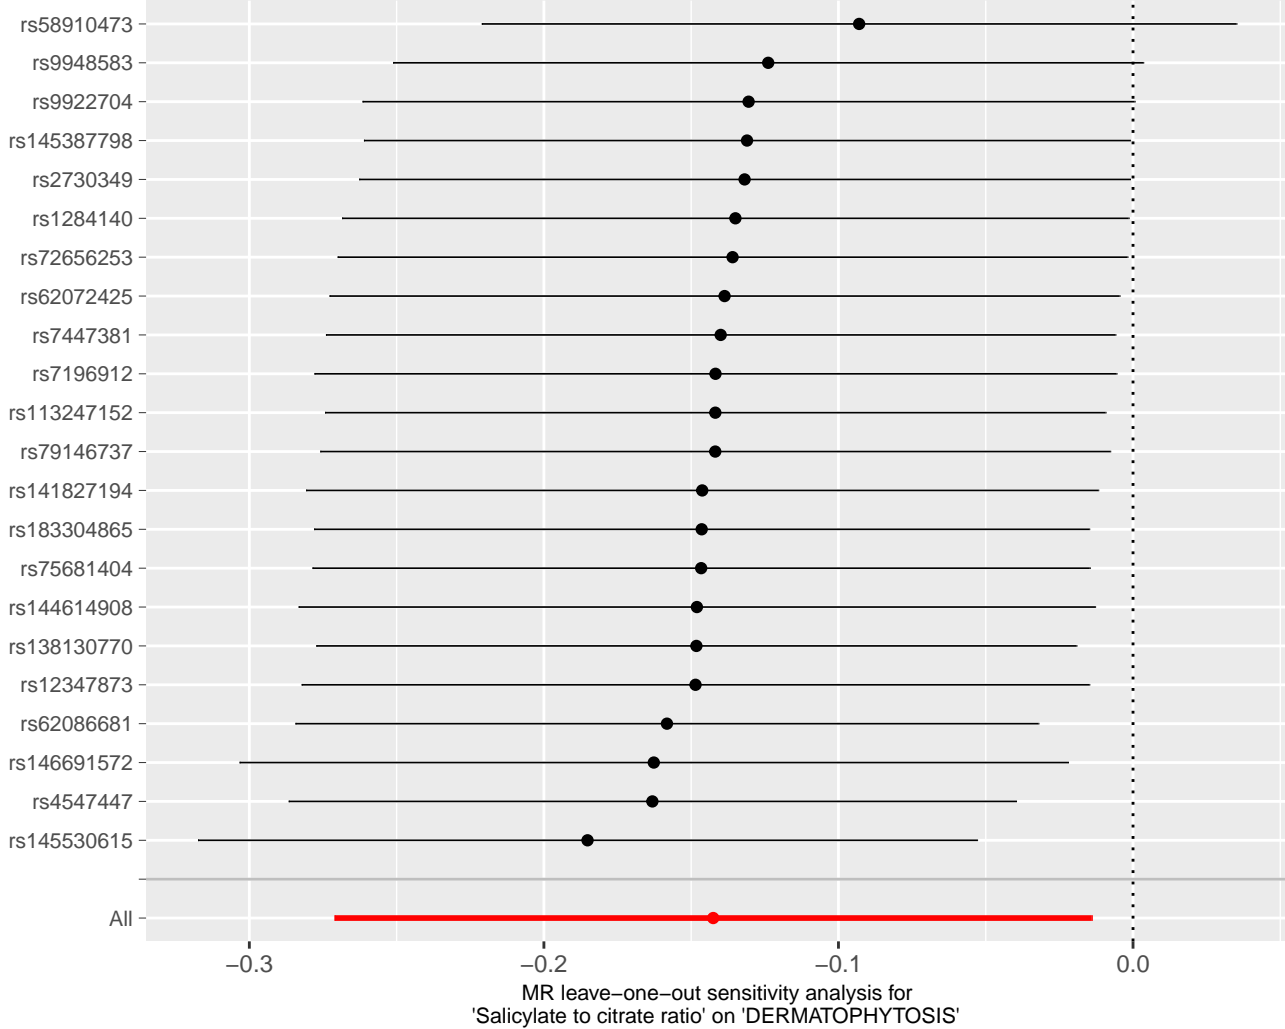

Supplement: Supplementary file 1 [file Figure S4.pdf › Figure S4.pdf]
