# Supplementary material
Source: publisher site journal article supplement (https://www.dovepress.com/article/538895)

### MR Method

- Inverse variance weighted
- MR Egger

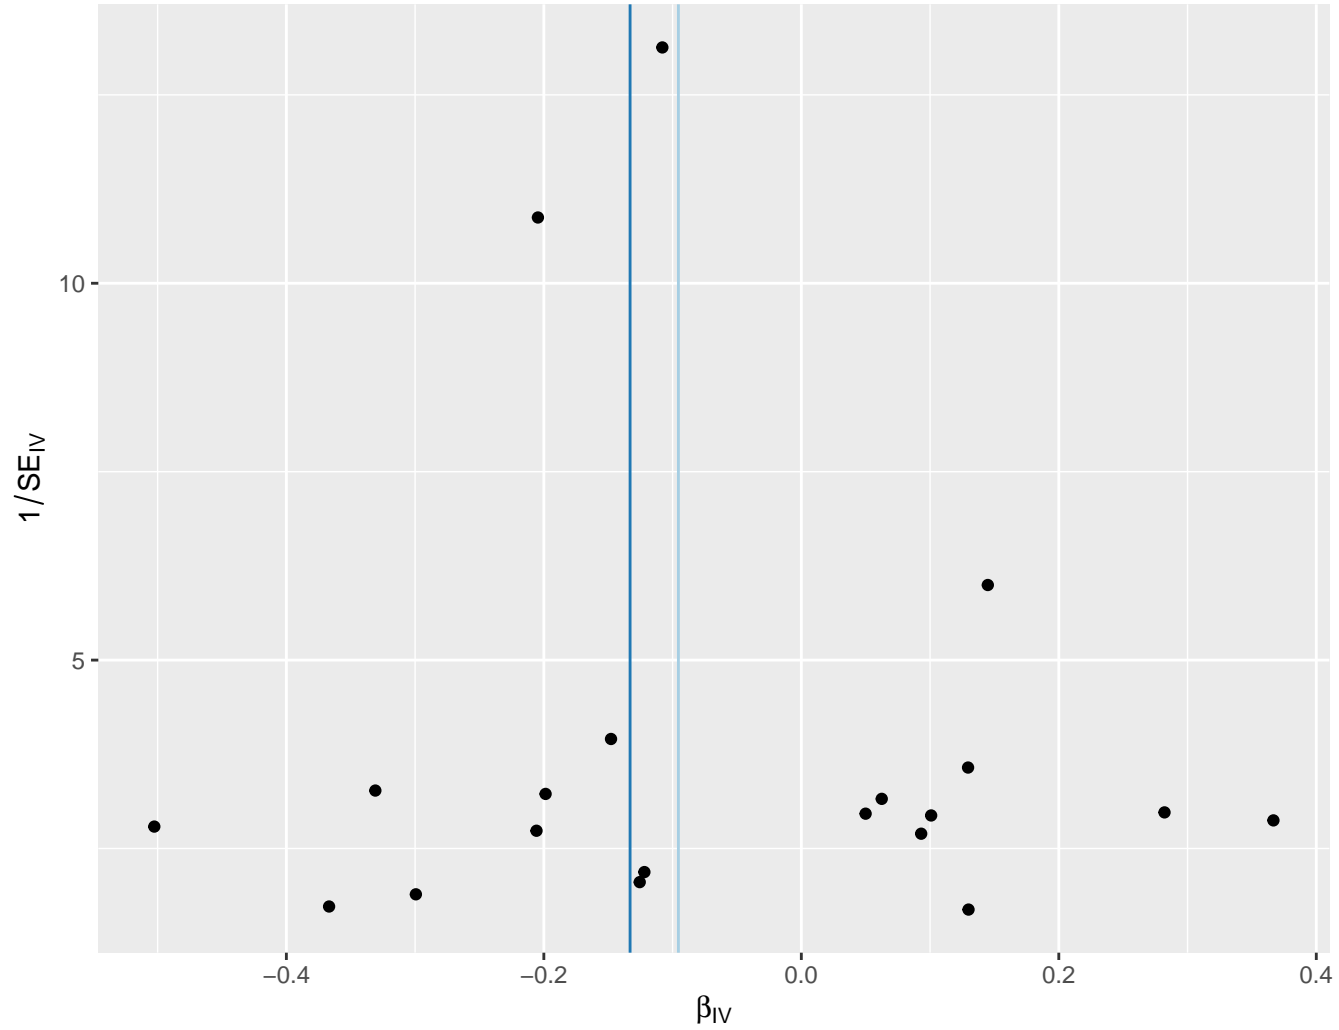

### MR Method

- Inverse variance weighted
- MR Egger

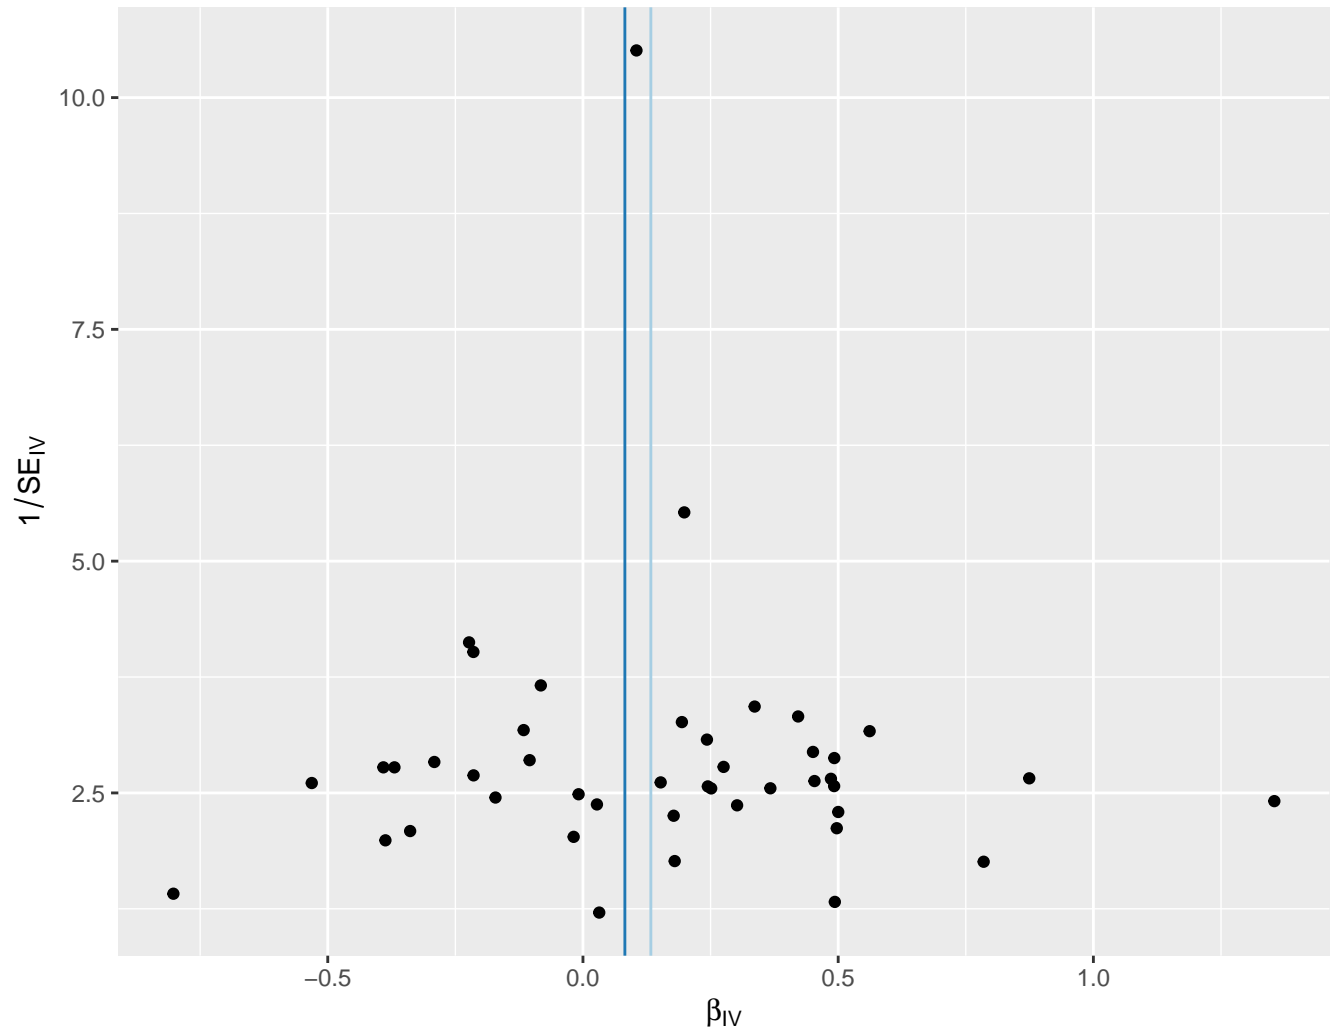

### MR Method

- Inverse variance weighted
- MR Egger

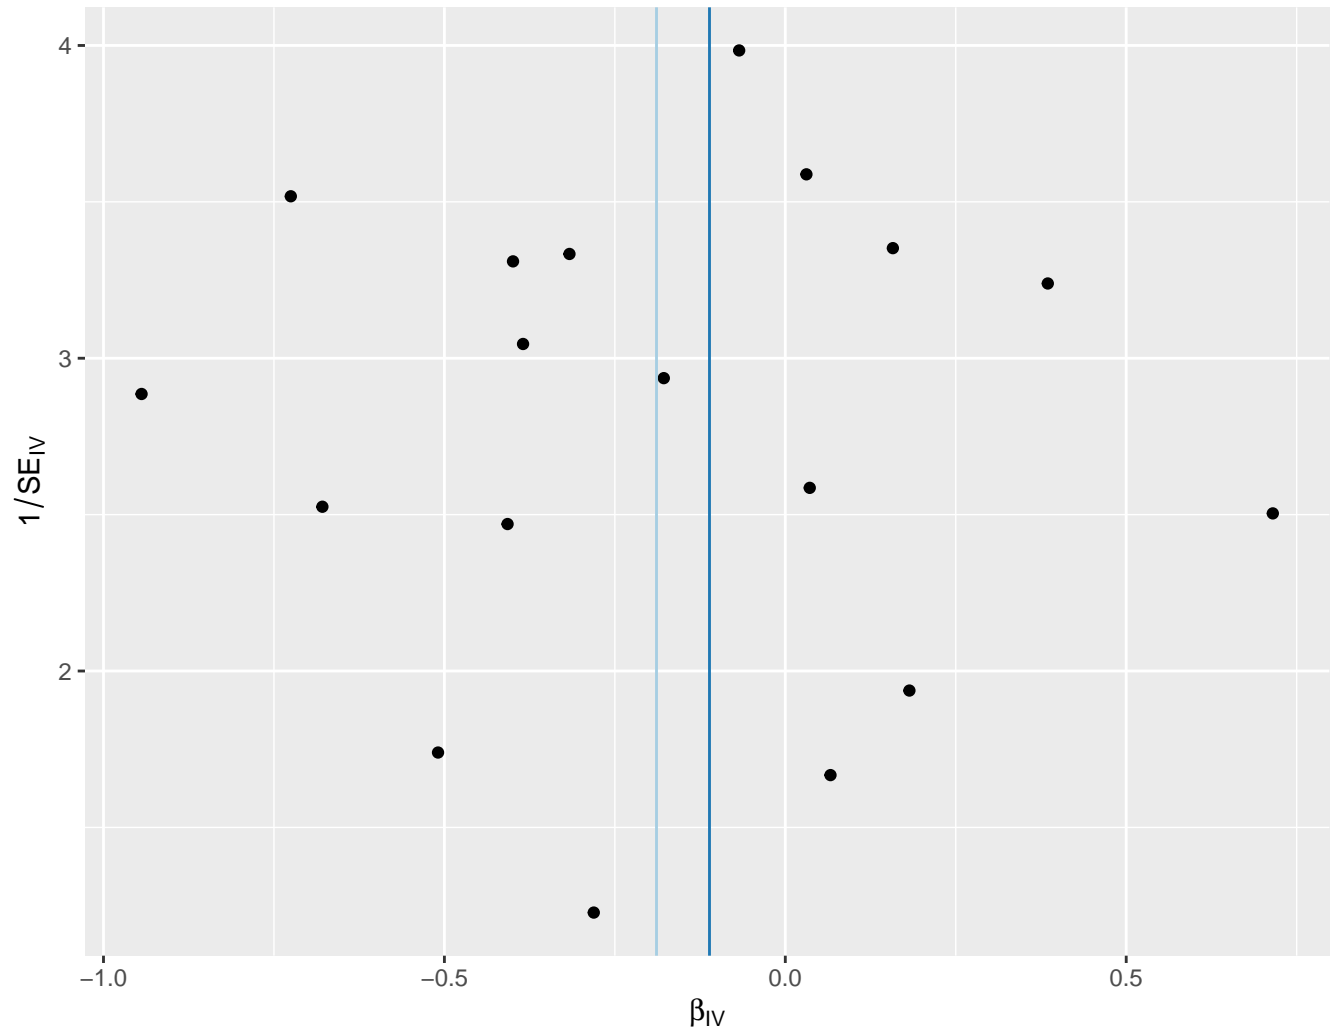

### MR Method

- Inverse variance weighted
- MR Egger

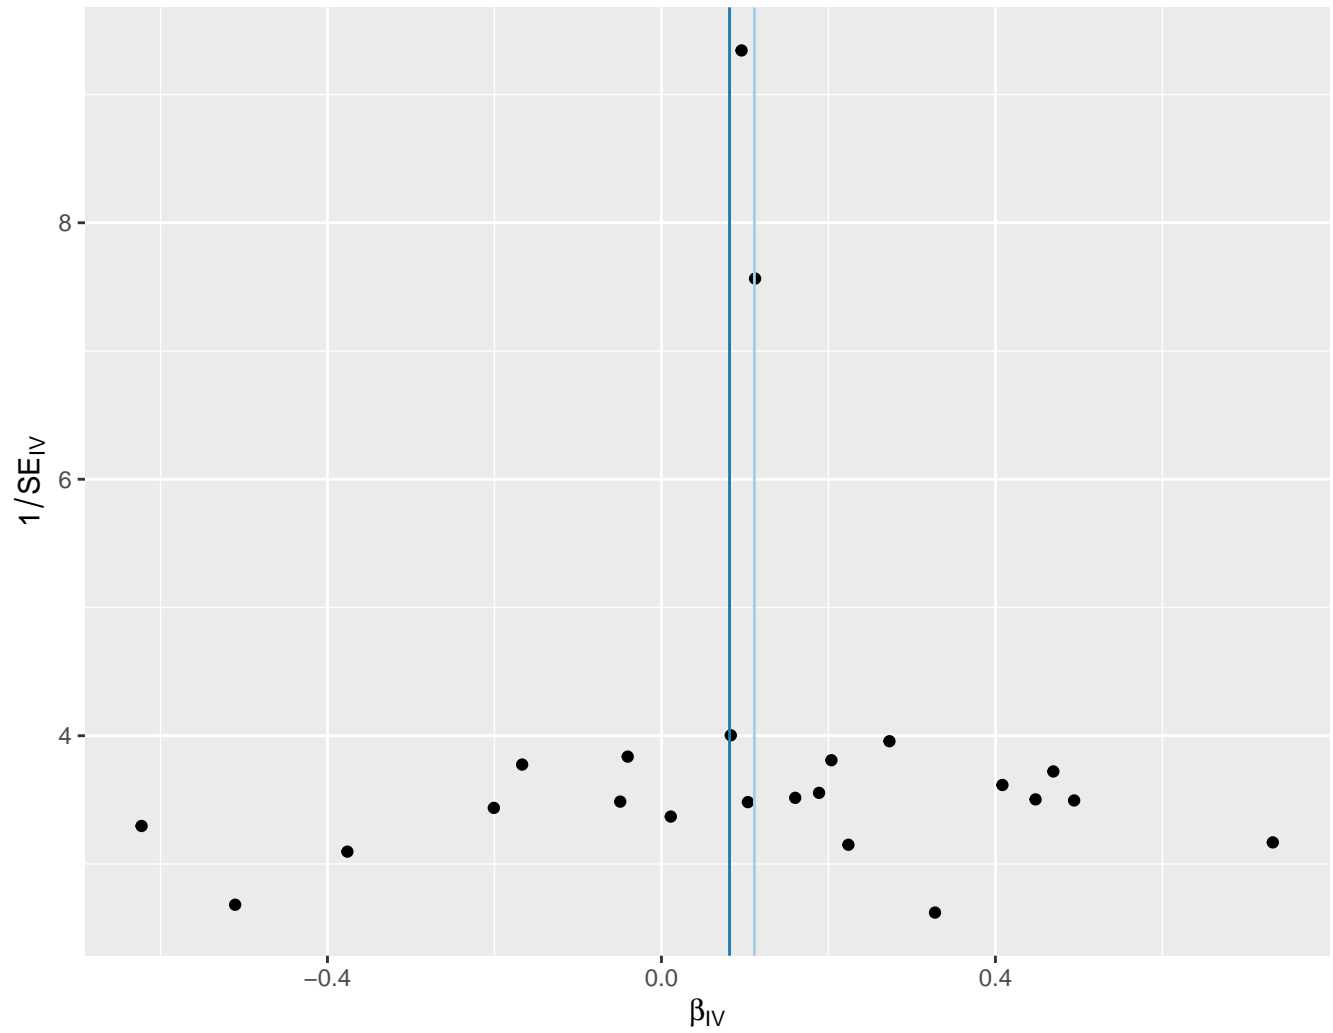

### MR Method

- Inverse variance weighted
- MR Egger

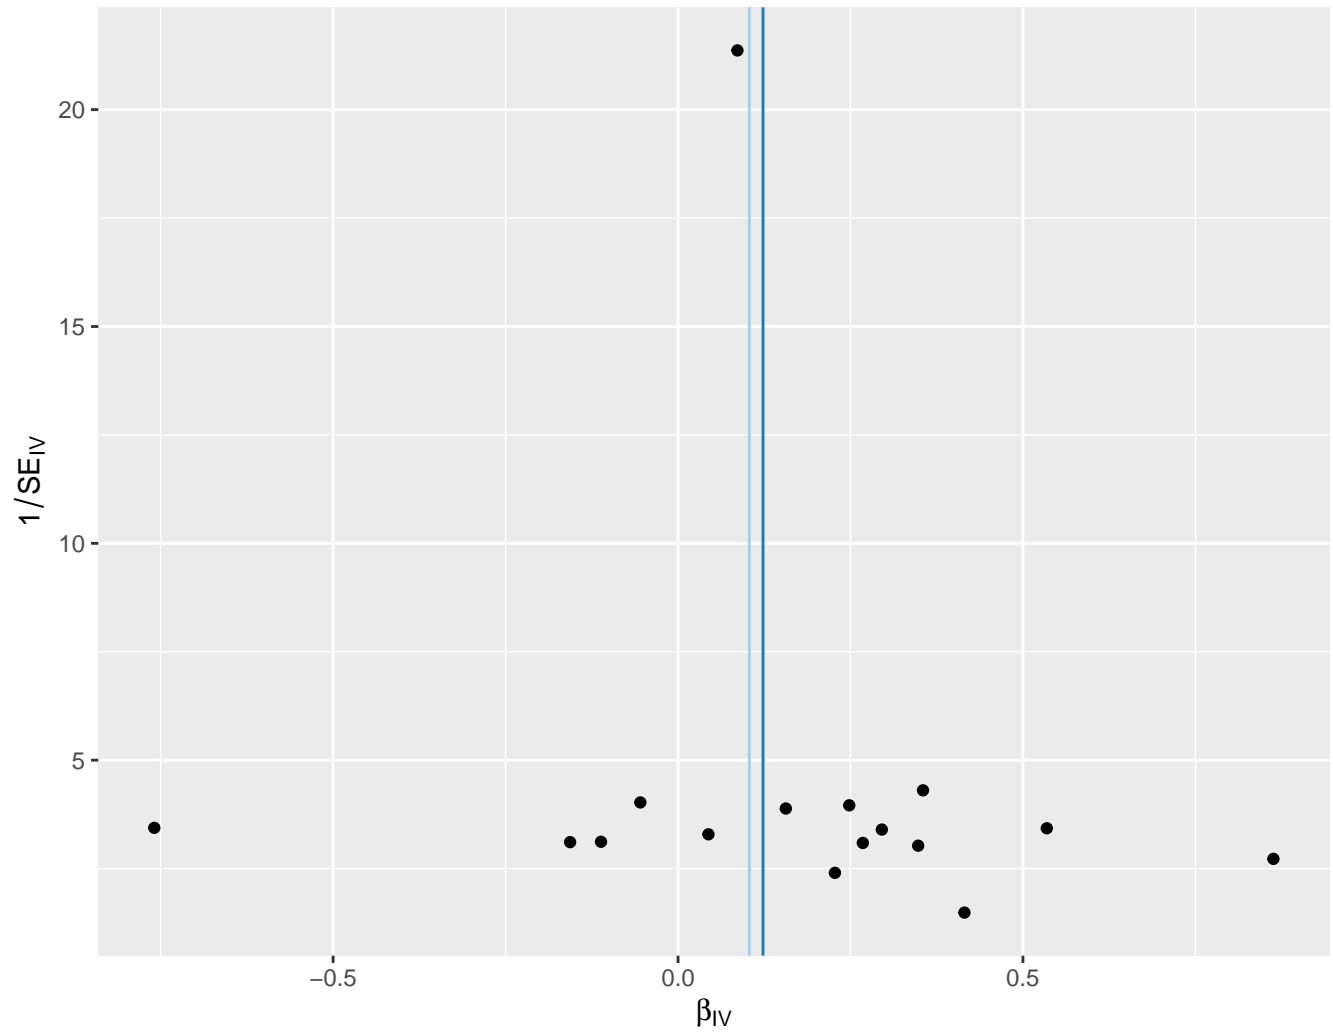

### MR Method

- Inverse variance weighted
- MR Egger

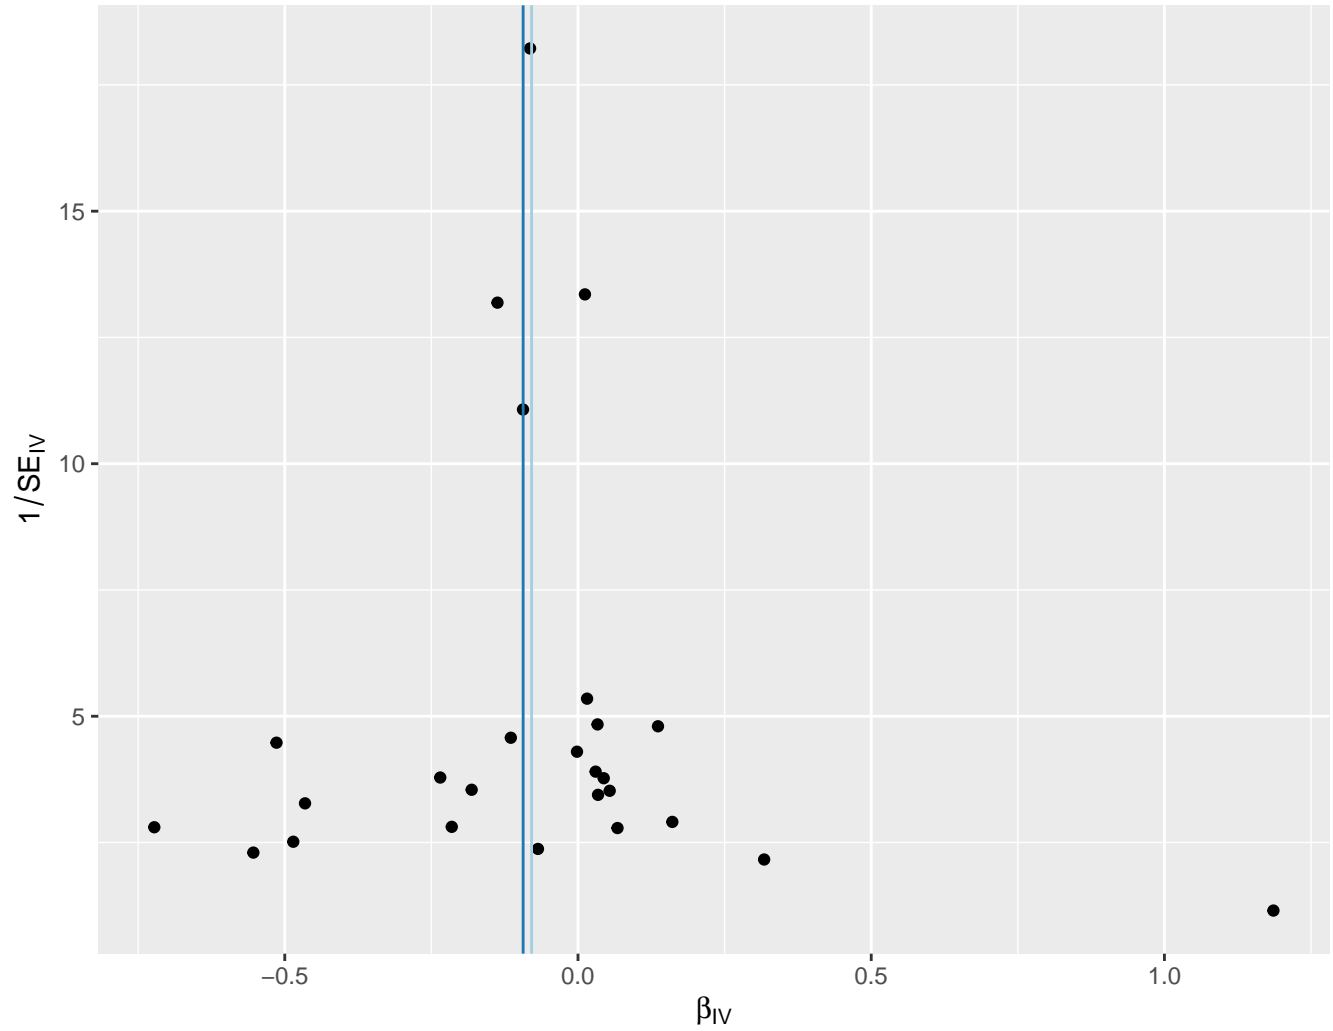

### MR Method

- Inverse variance weighted
- MR Egger

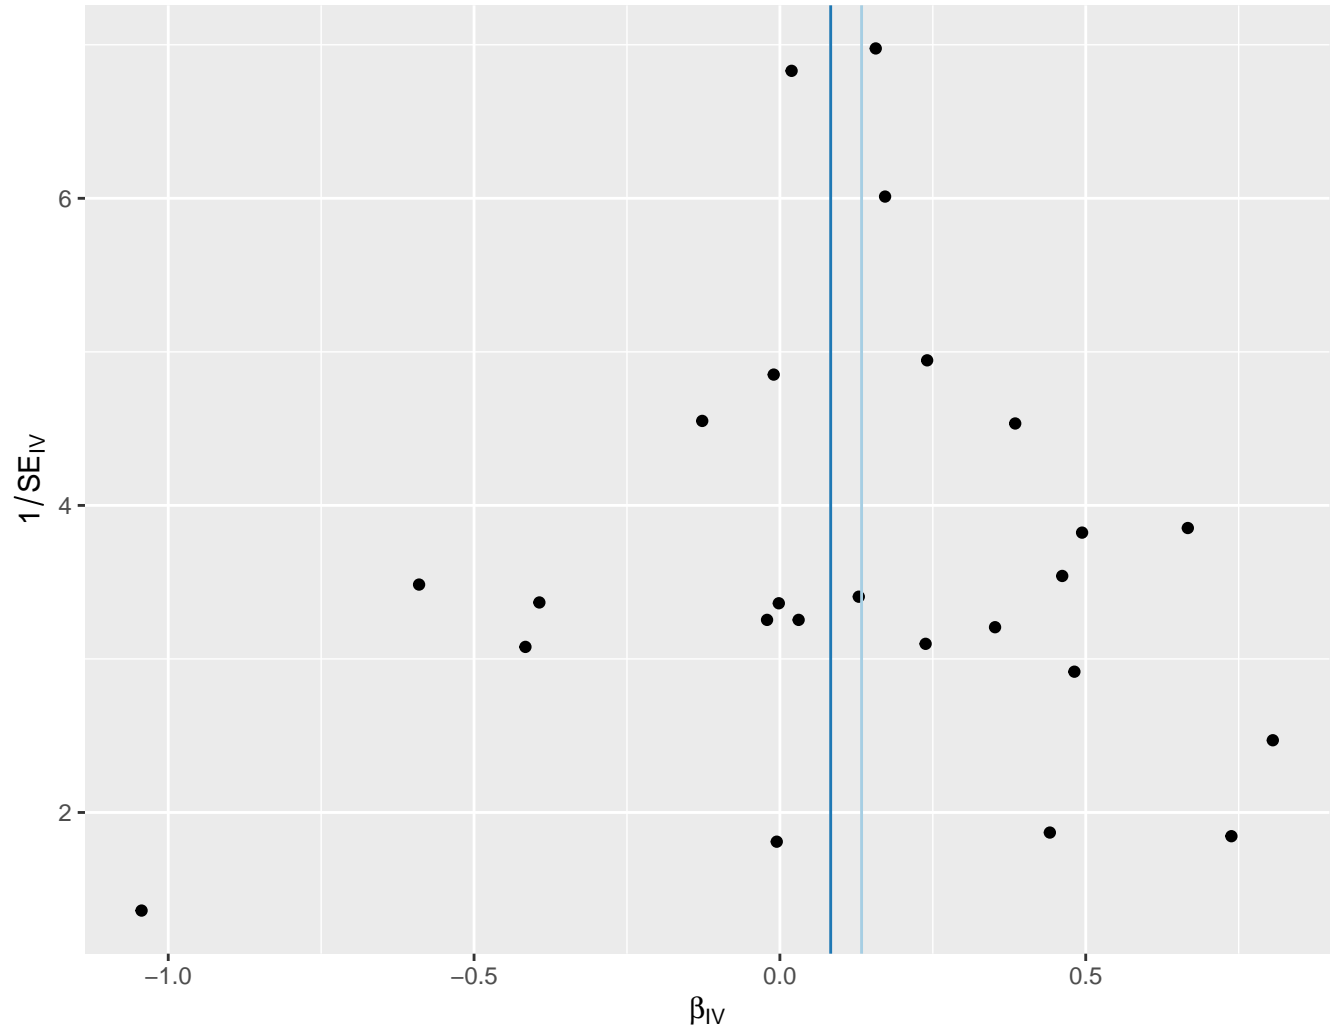

### MR Method

- Inverse variance weighted
- MR Egger

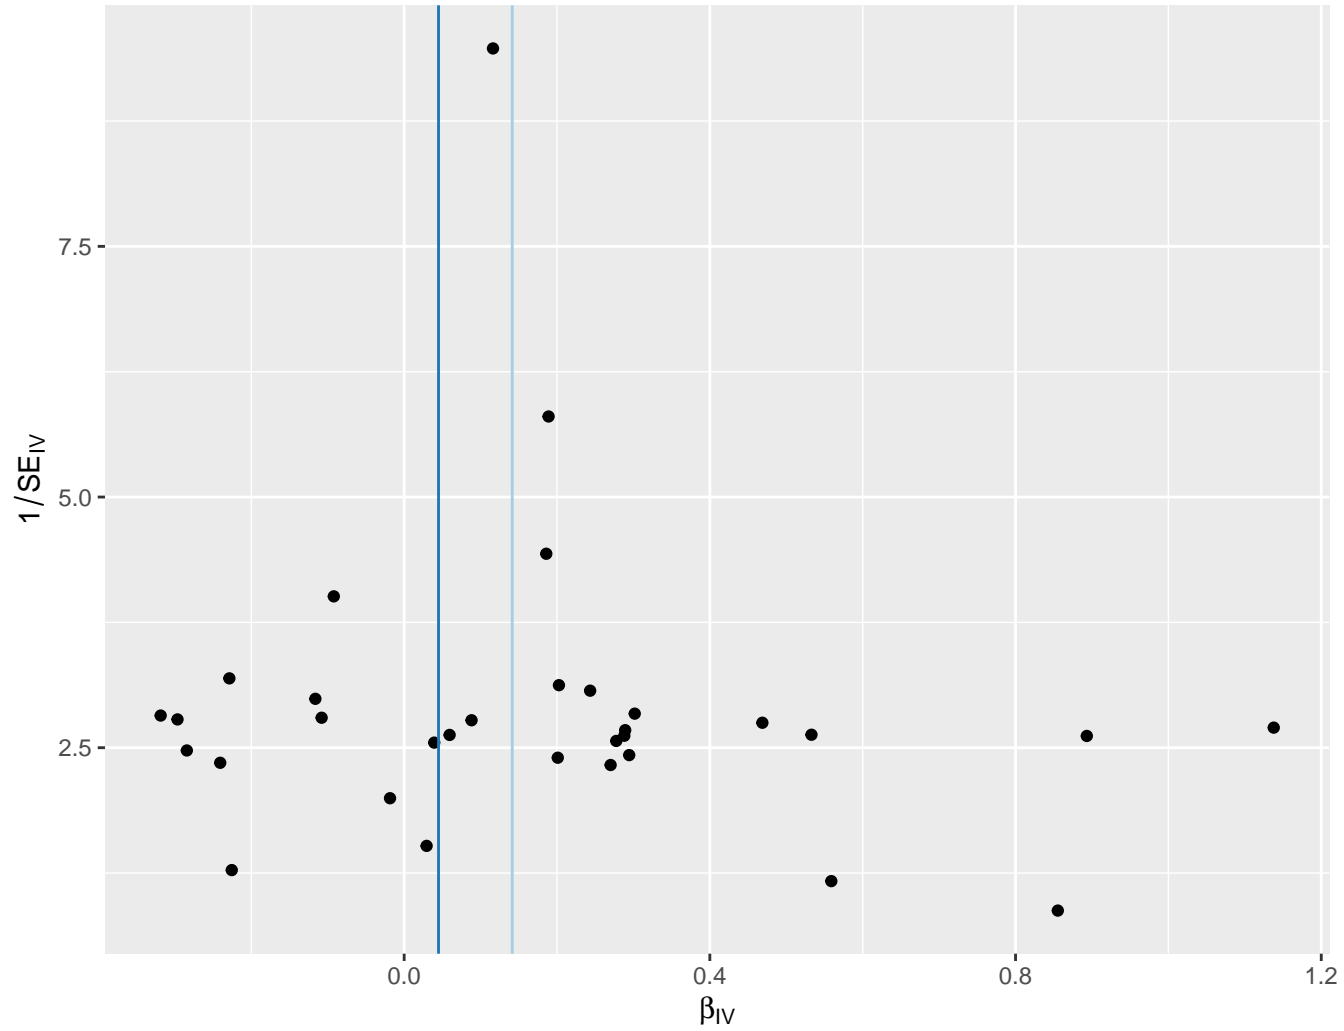

### MR Method

- Inverse variance weighted
- MR Egger

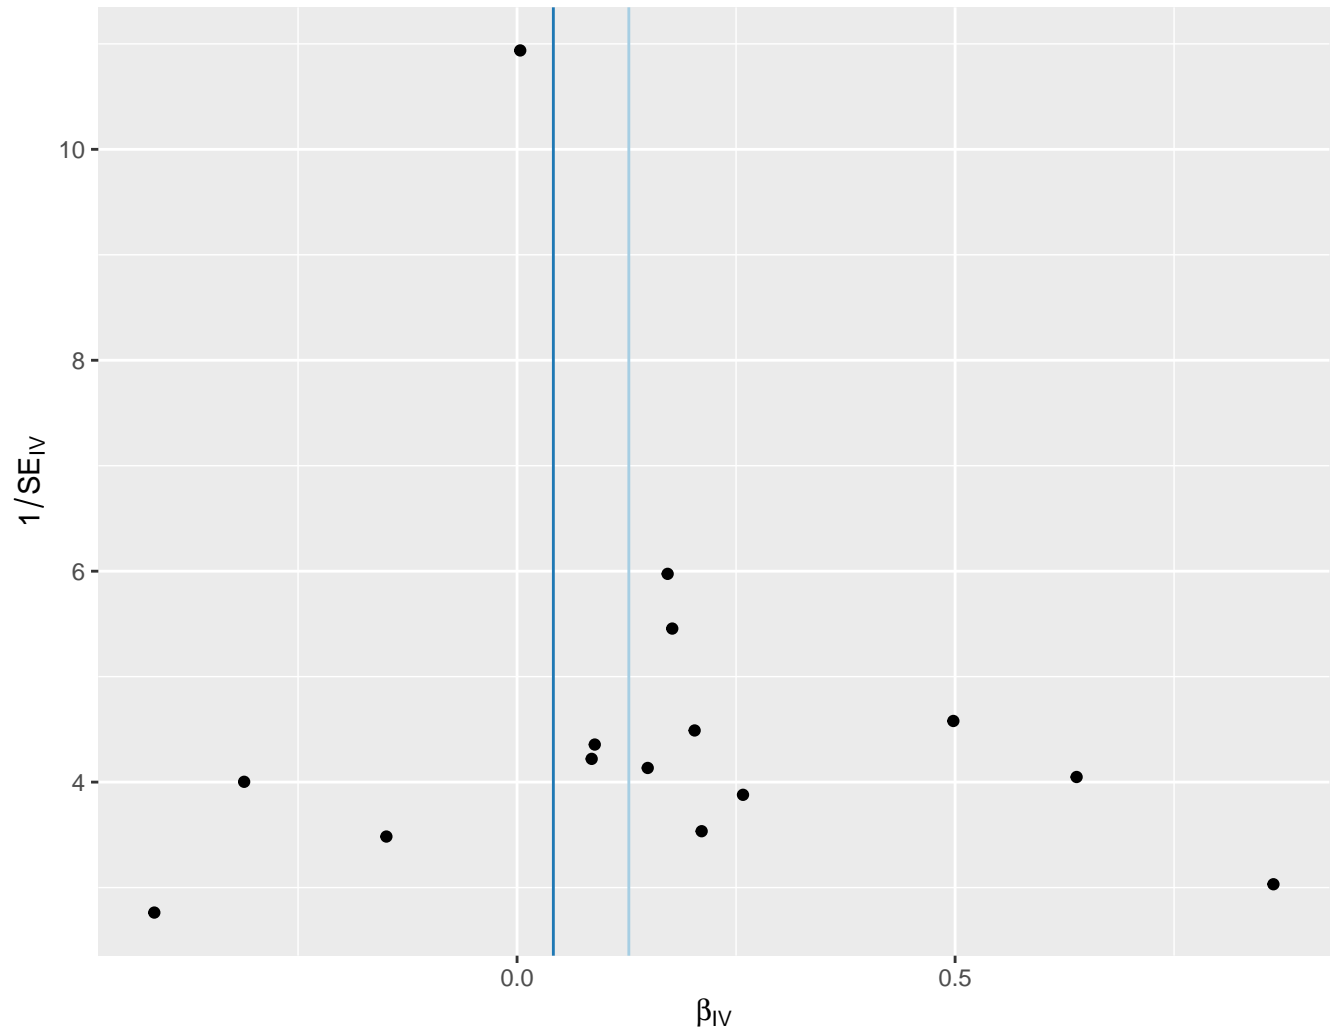

MR Method

- Inverse variance weighted
- MR Egger

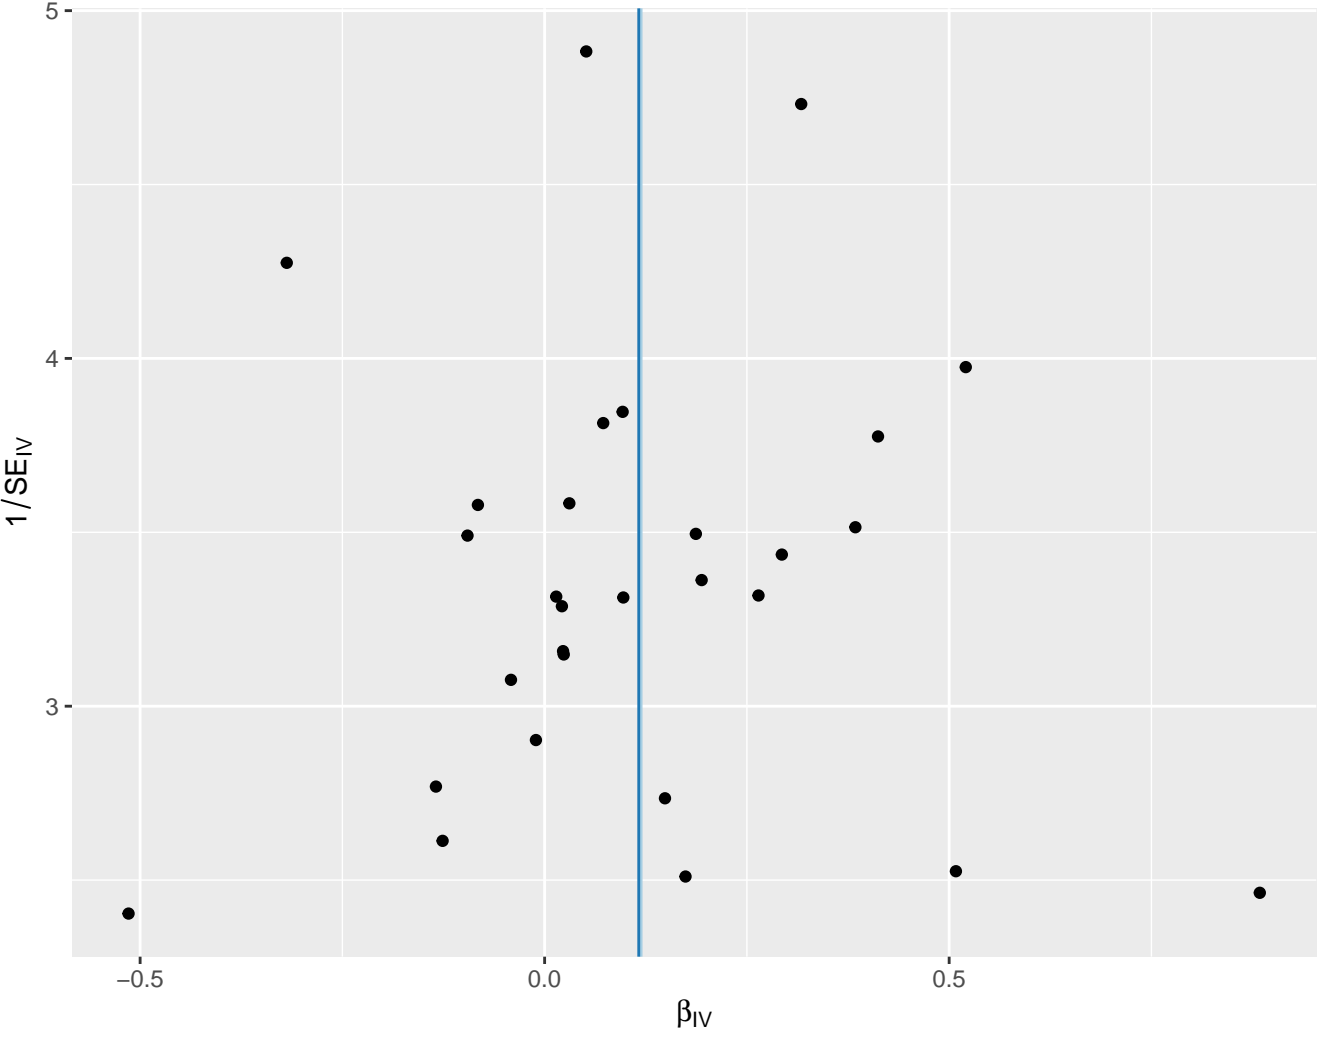

### MR Method

- Inverse variance weighted
- MR Egger

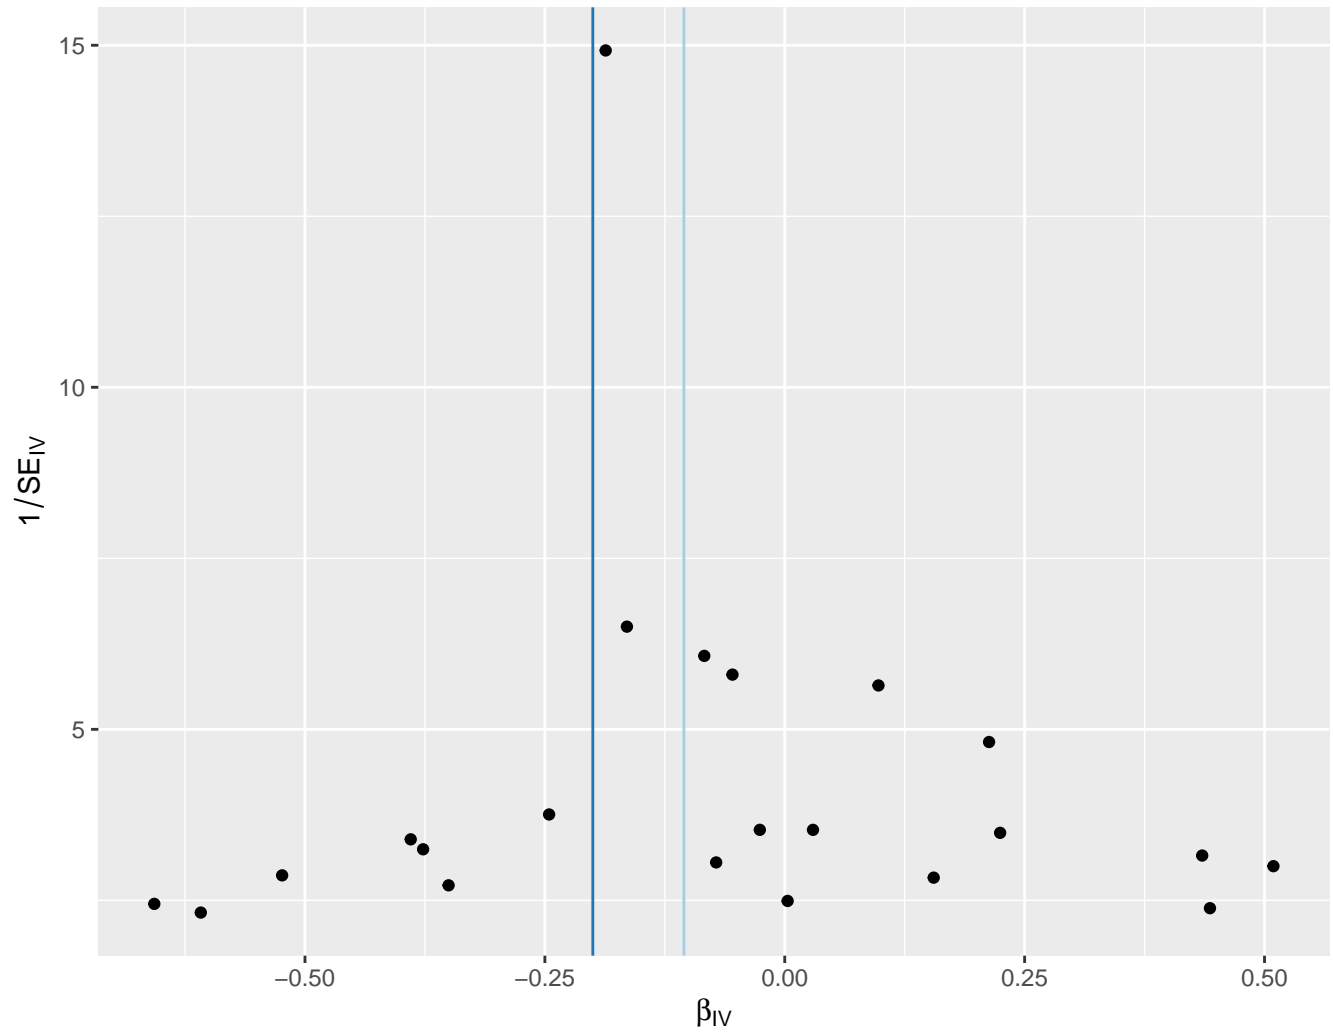

### MR Method

- Inverse variance weighted
- MR Egger

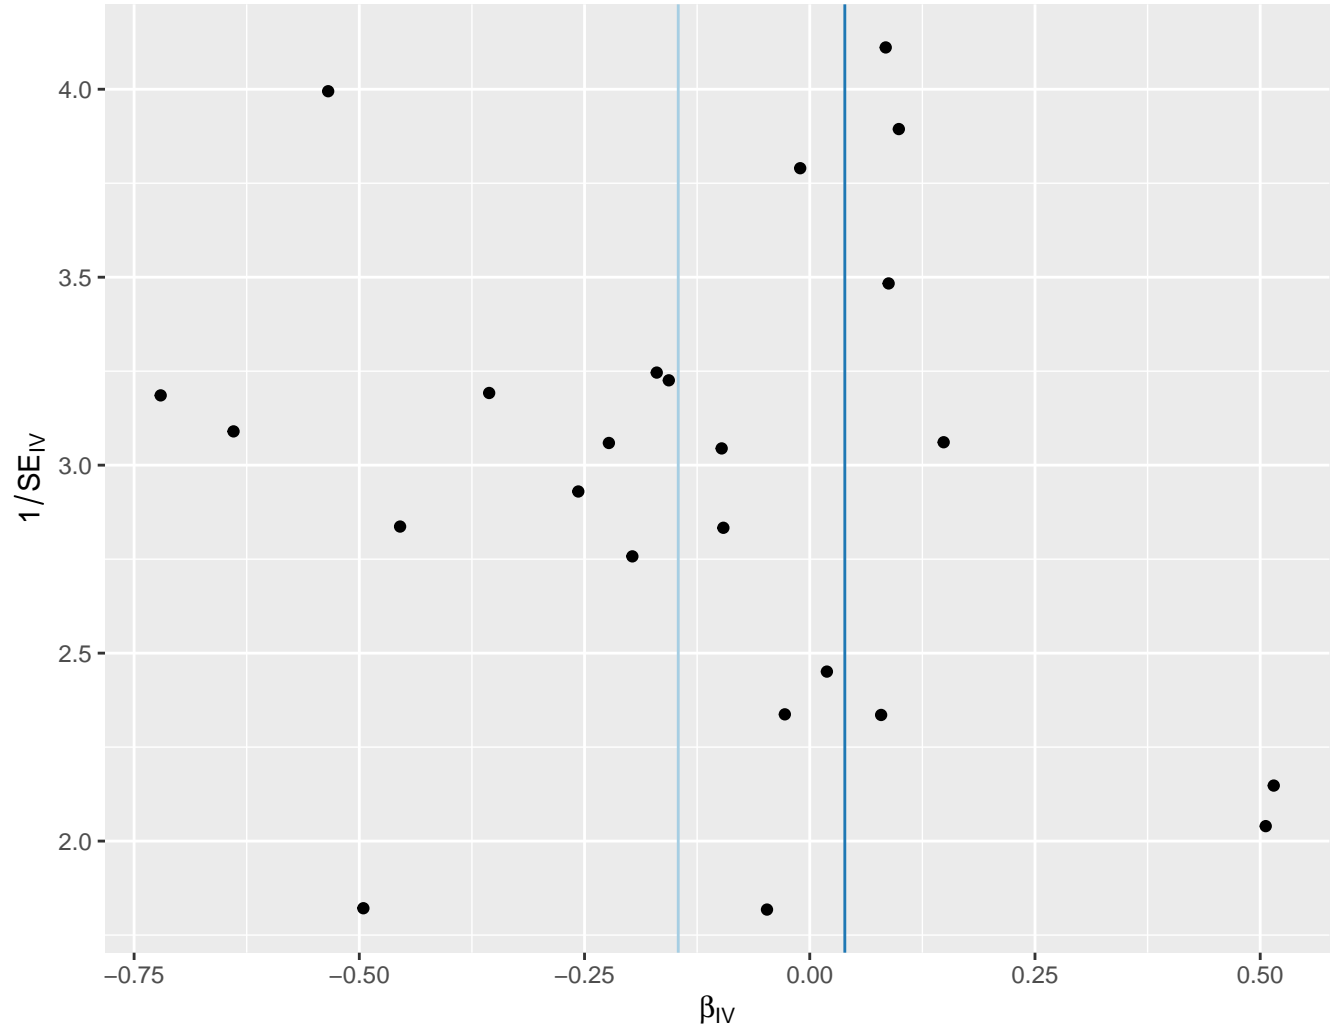

### MR Method

- Inverse variance weighted
- MR Egger

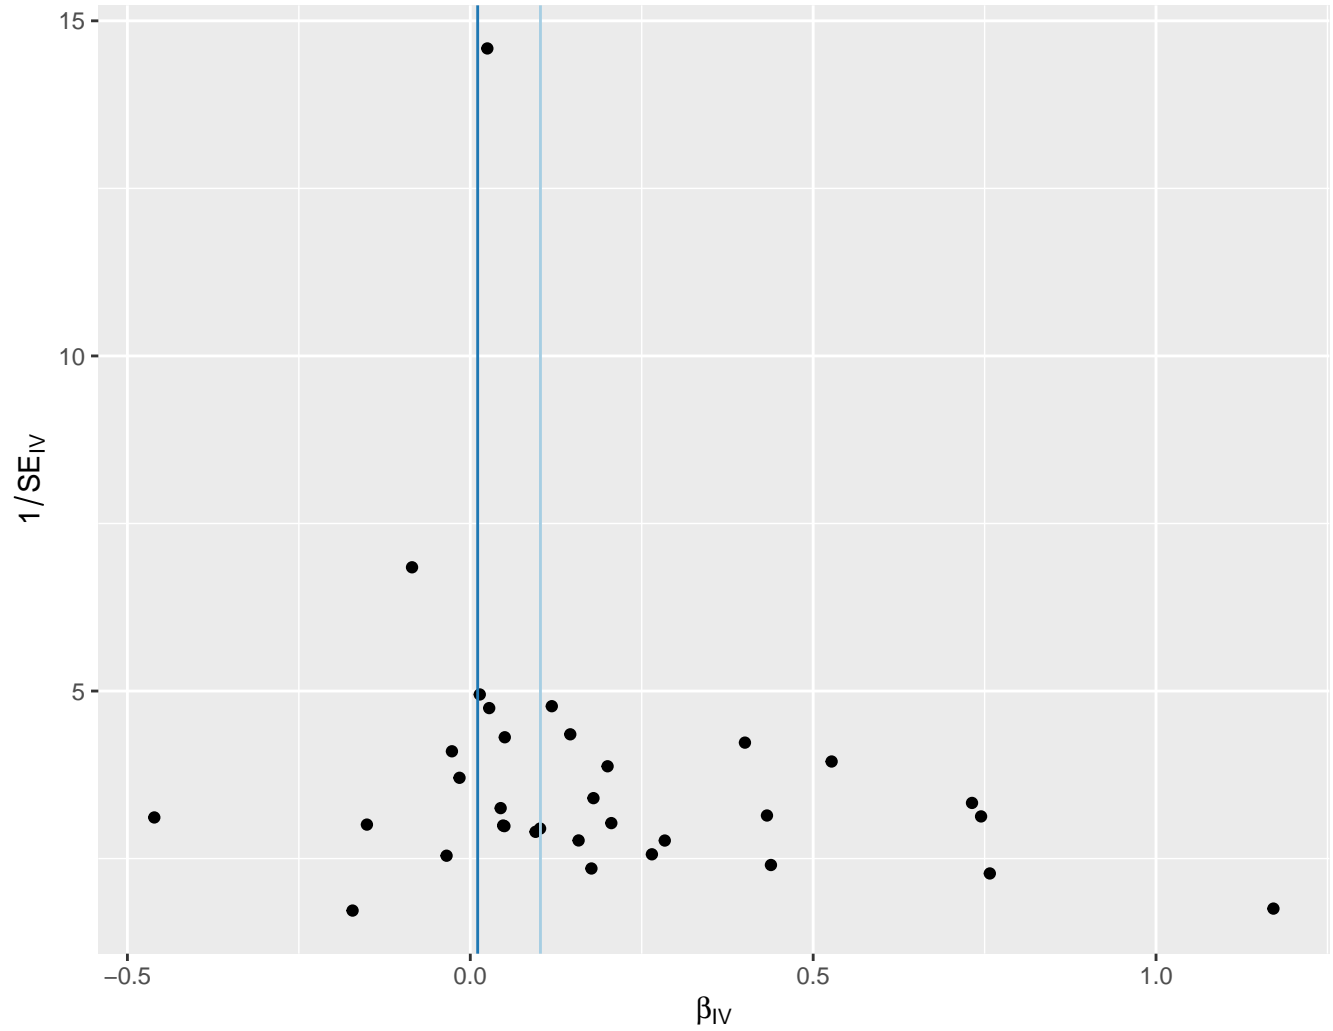

### MR Method

- Inverse variance weighted
- MR Egger

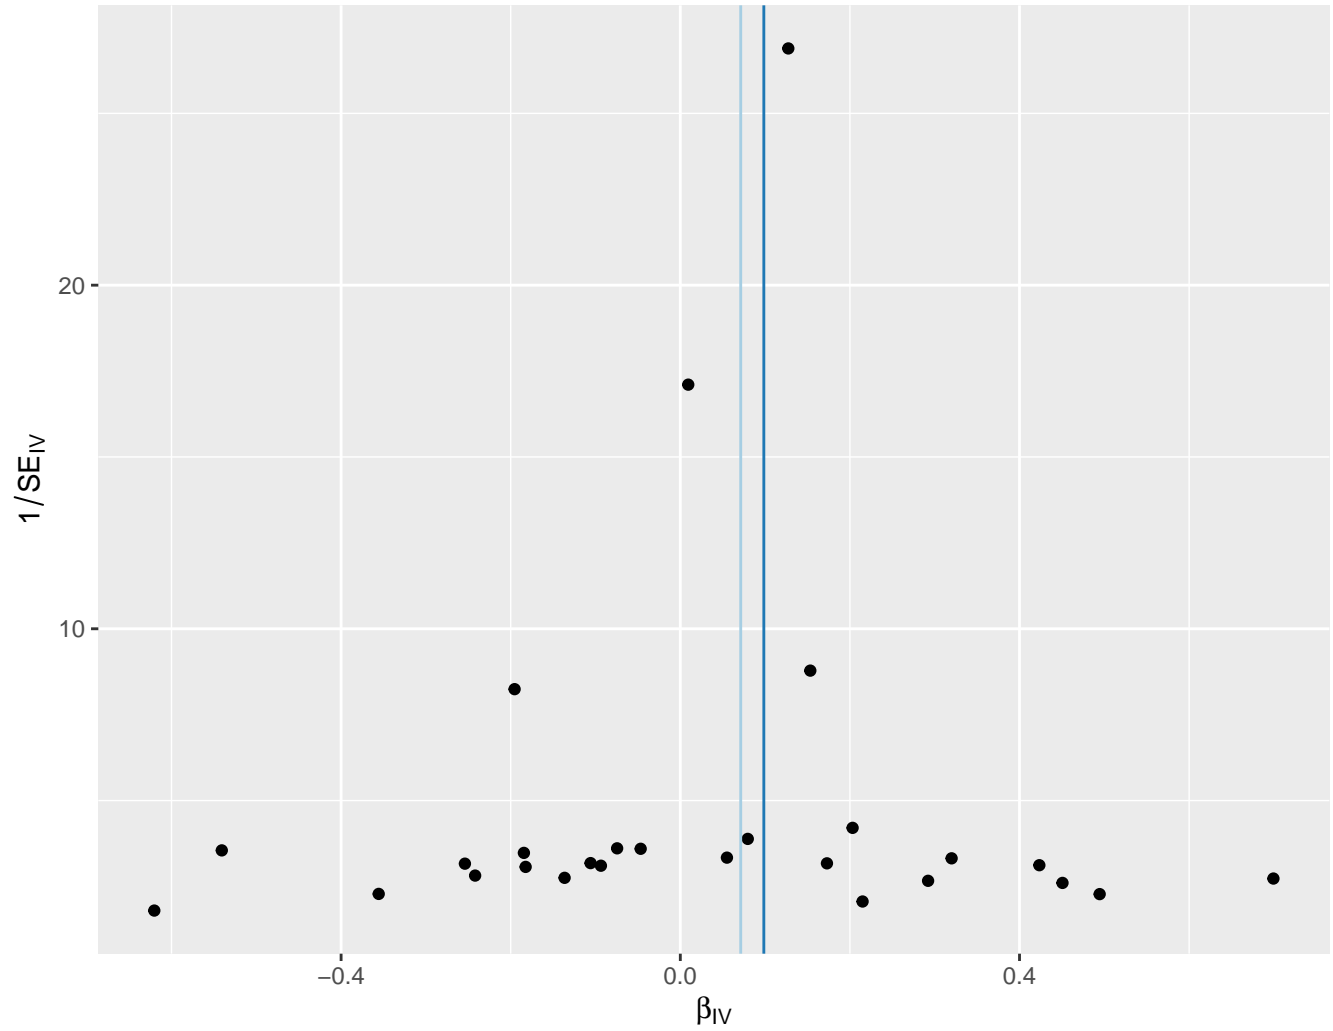

### MR Method

- Inverse variance weighted
- MR Egger

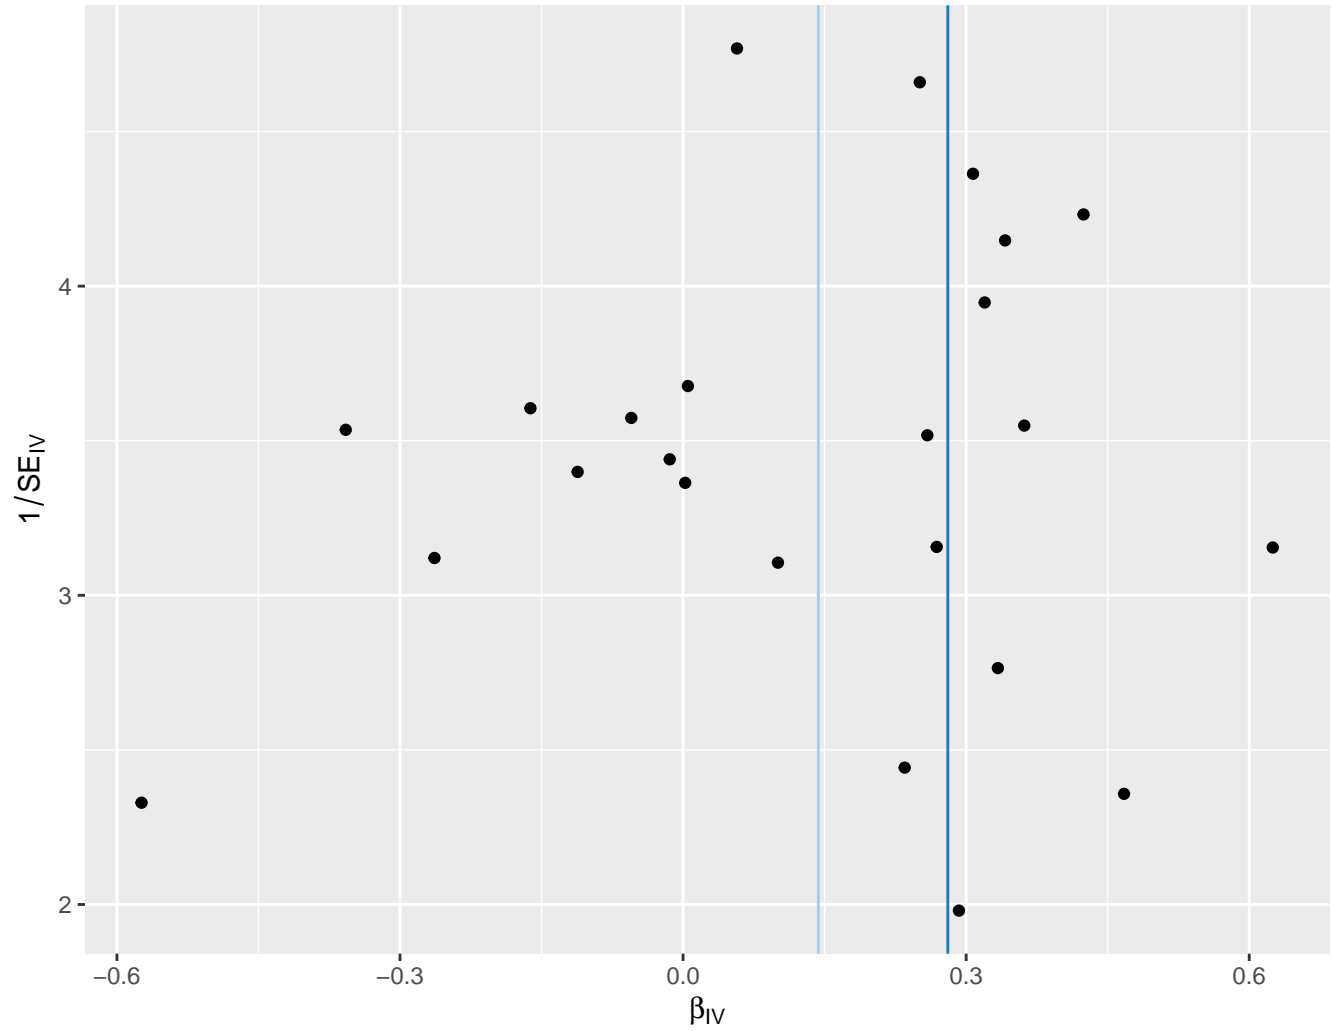

### MR Method

- Inverse variance weighted
- MR Egger

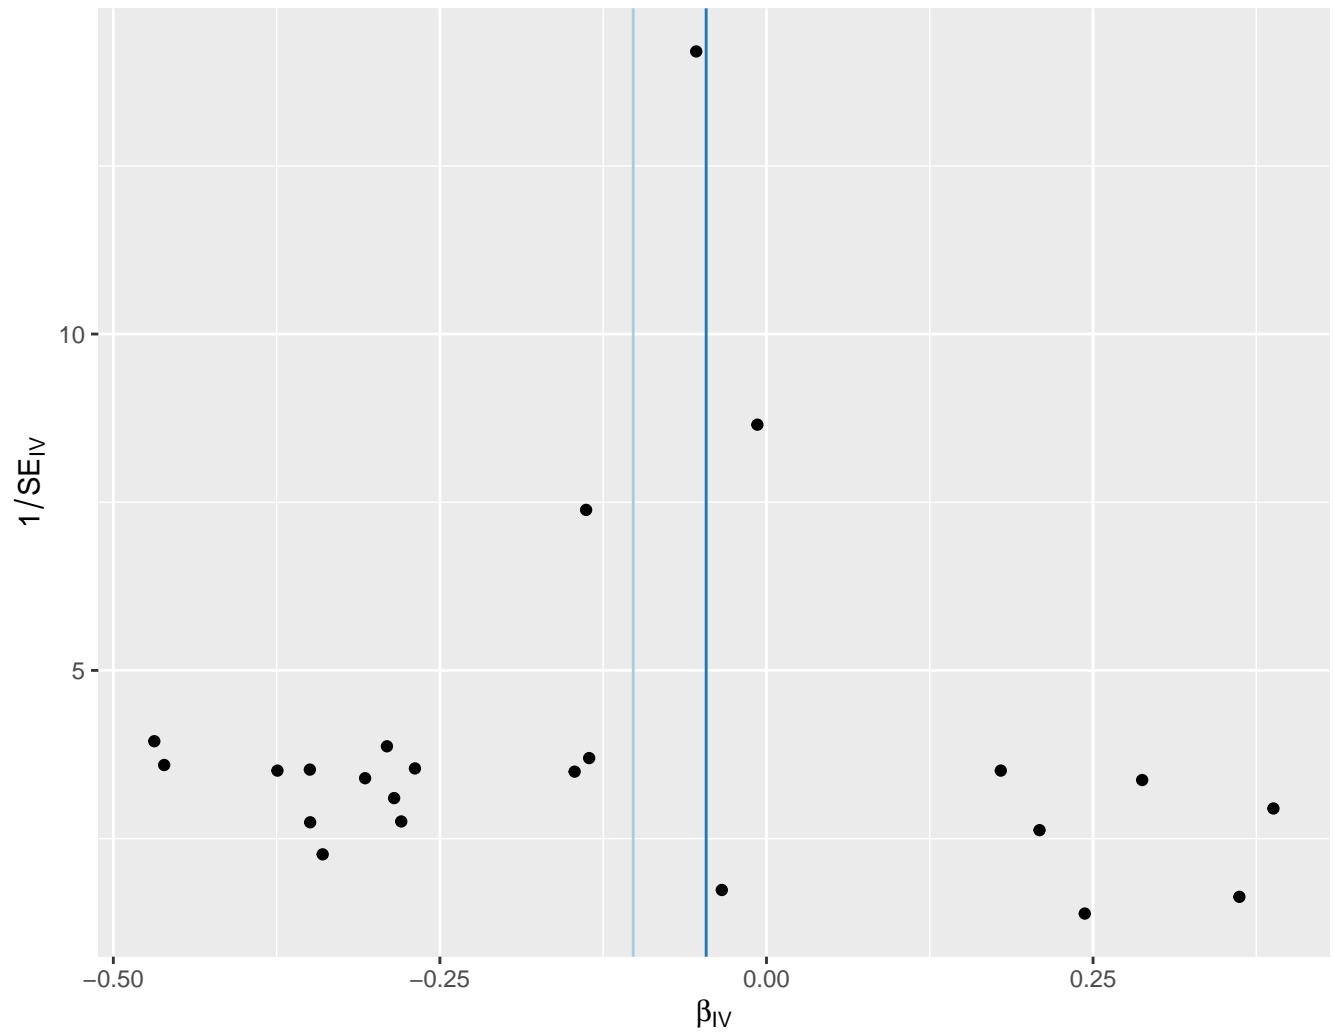

### MR Method

- Inverse variance weighted
- MR Egger

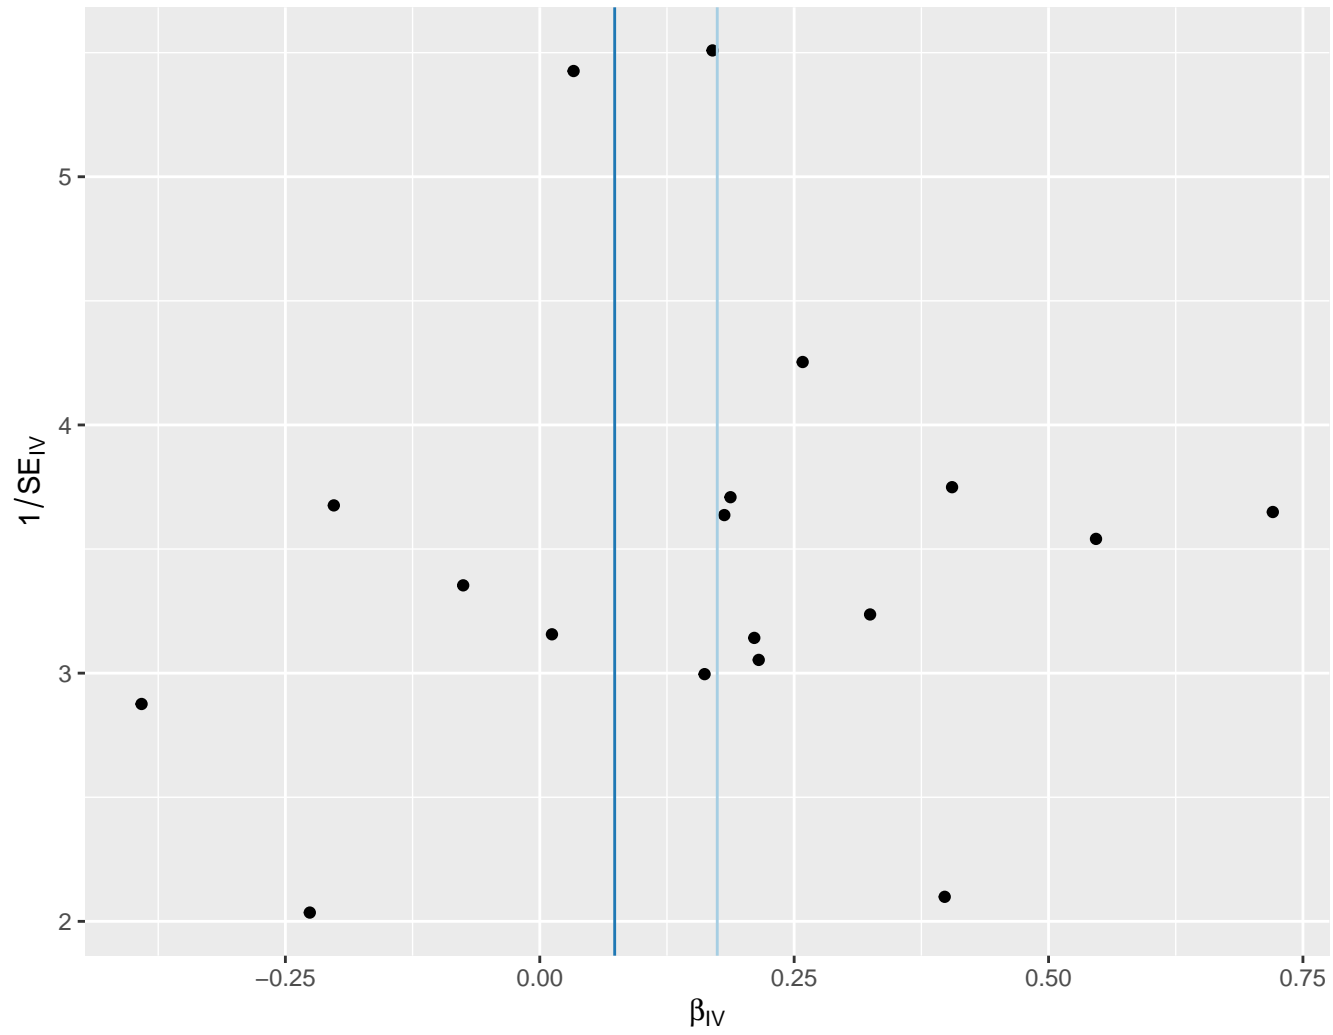

### MR Method

- Inverse variance weighted
- MR Egger

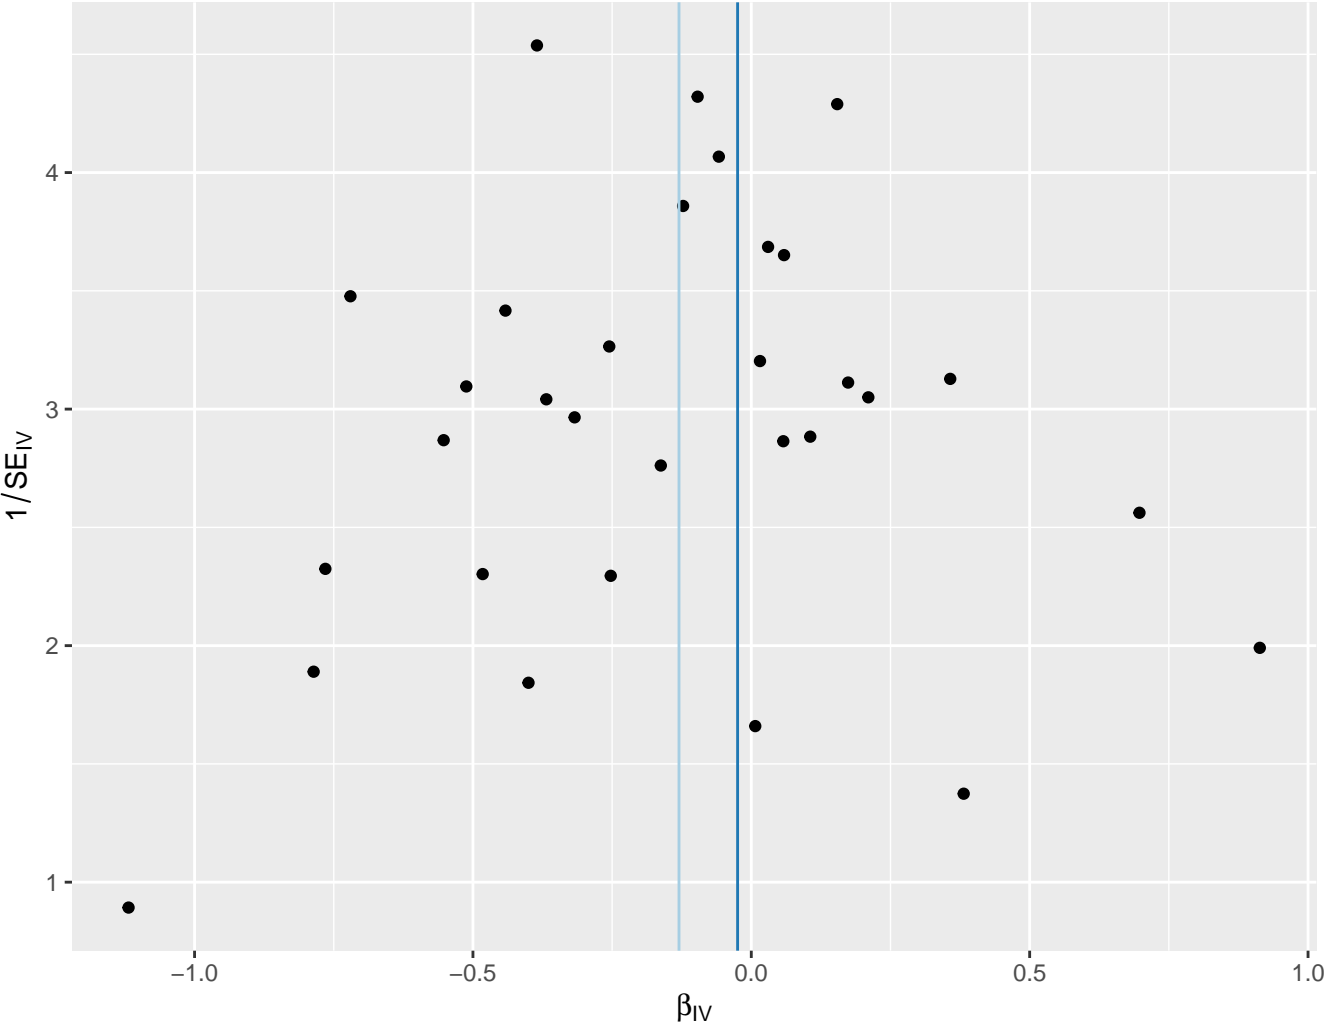

### MR Method

- Inverse variance weighted
- MR Egger

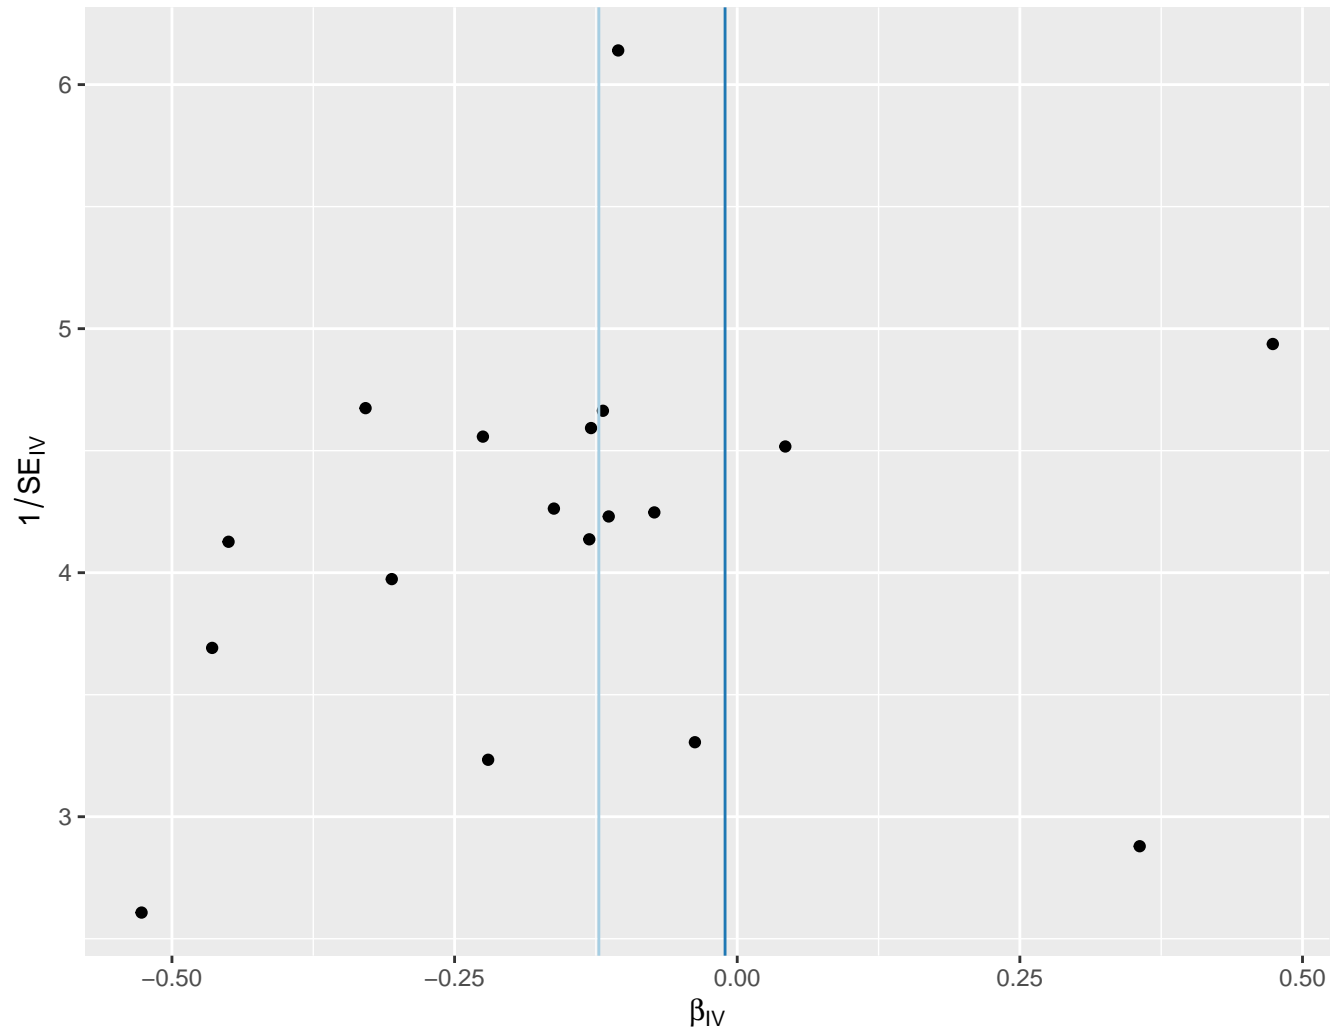

### MR Method

- Inverse variance weighted
- MR Egger

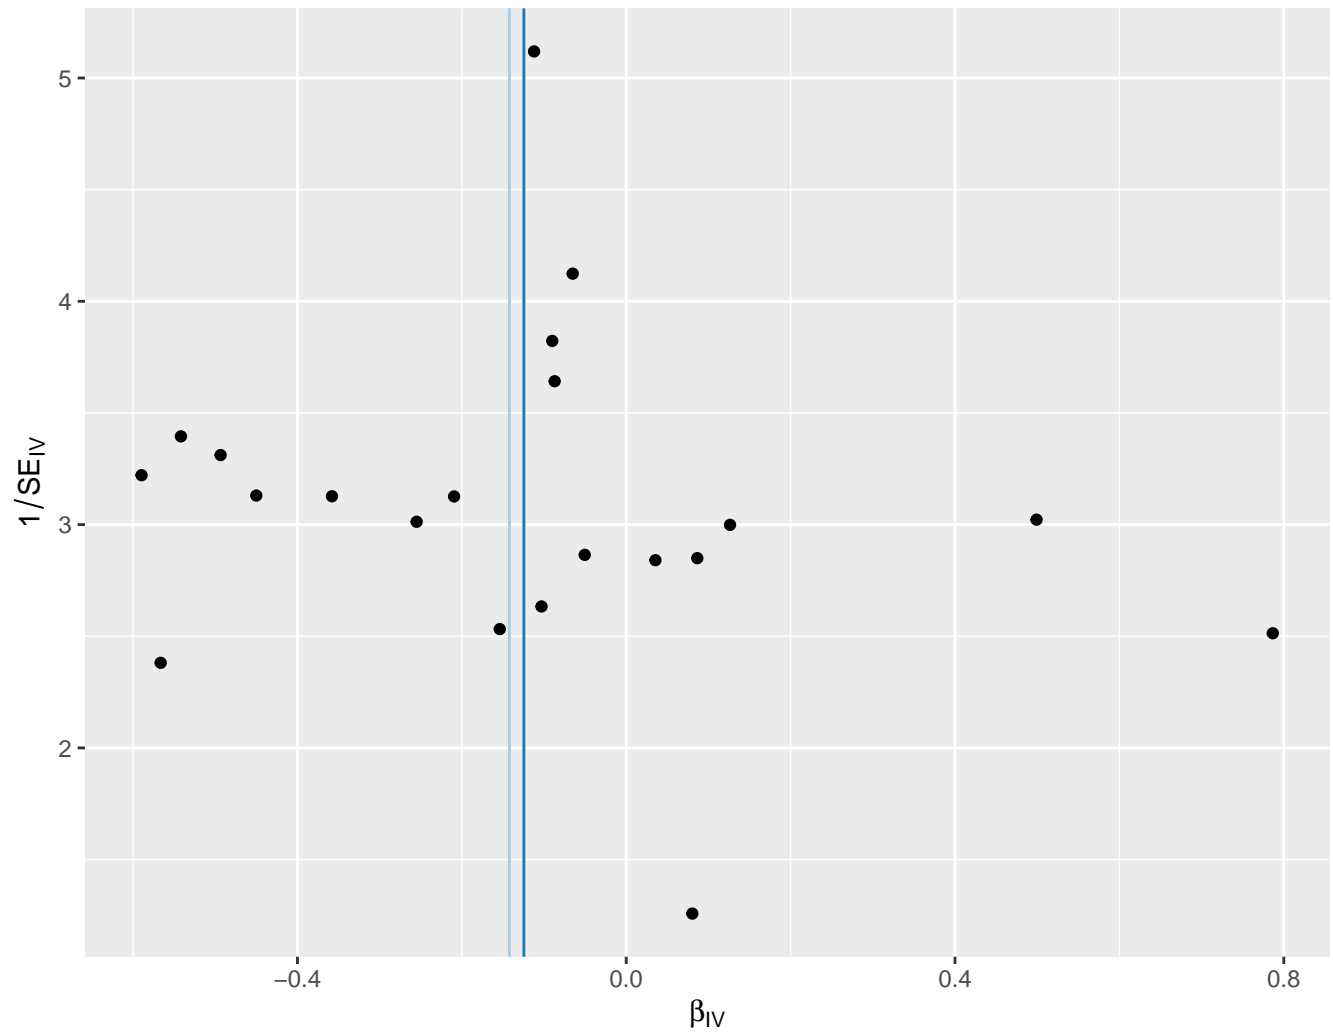

### MR Method

- Inverse variance weighted
- MR Egger

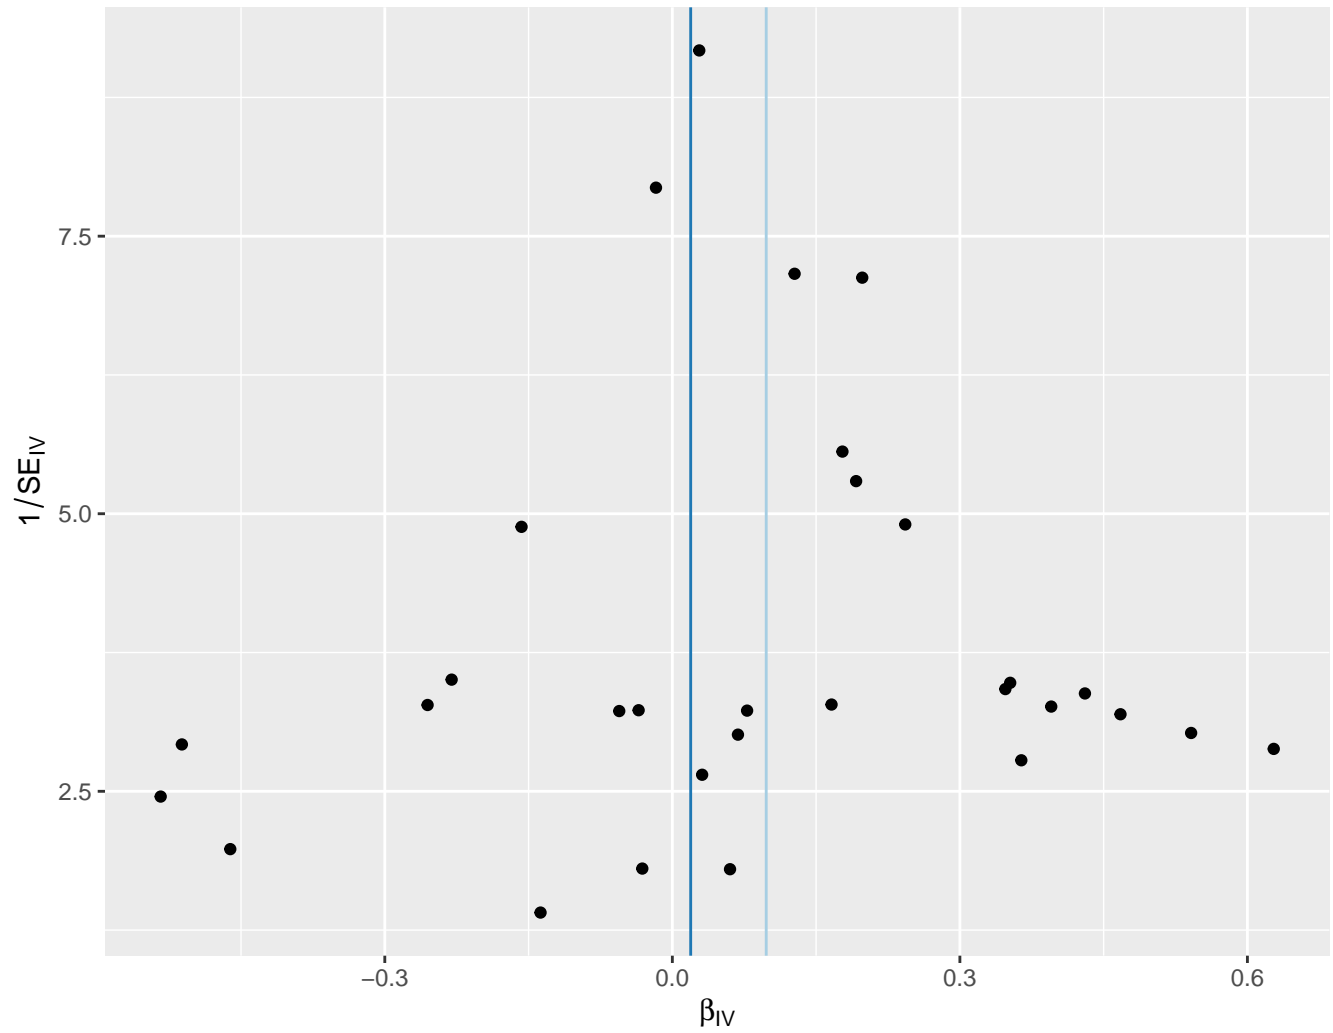

### MR Method

- Inverse variance weighted
- MR Egger

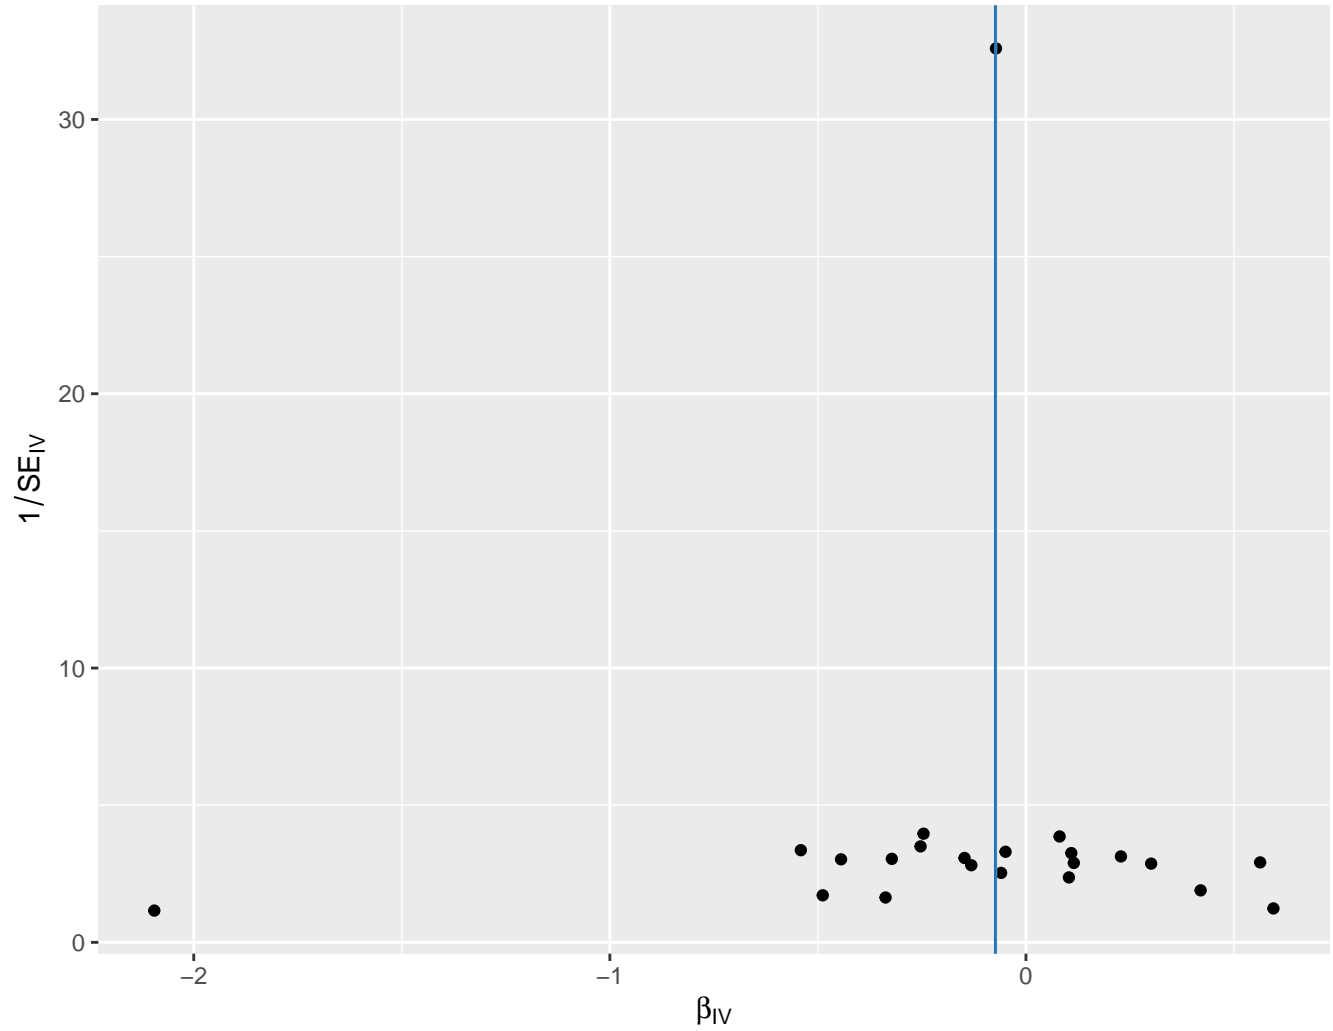

MR Method

- Inverse variance weighted
- MR Egger

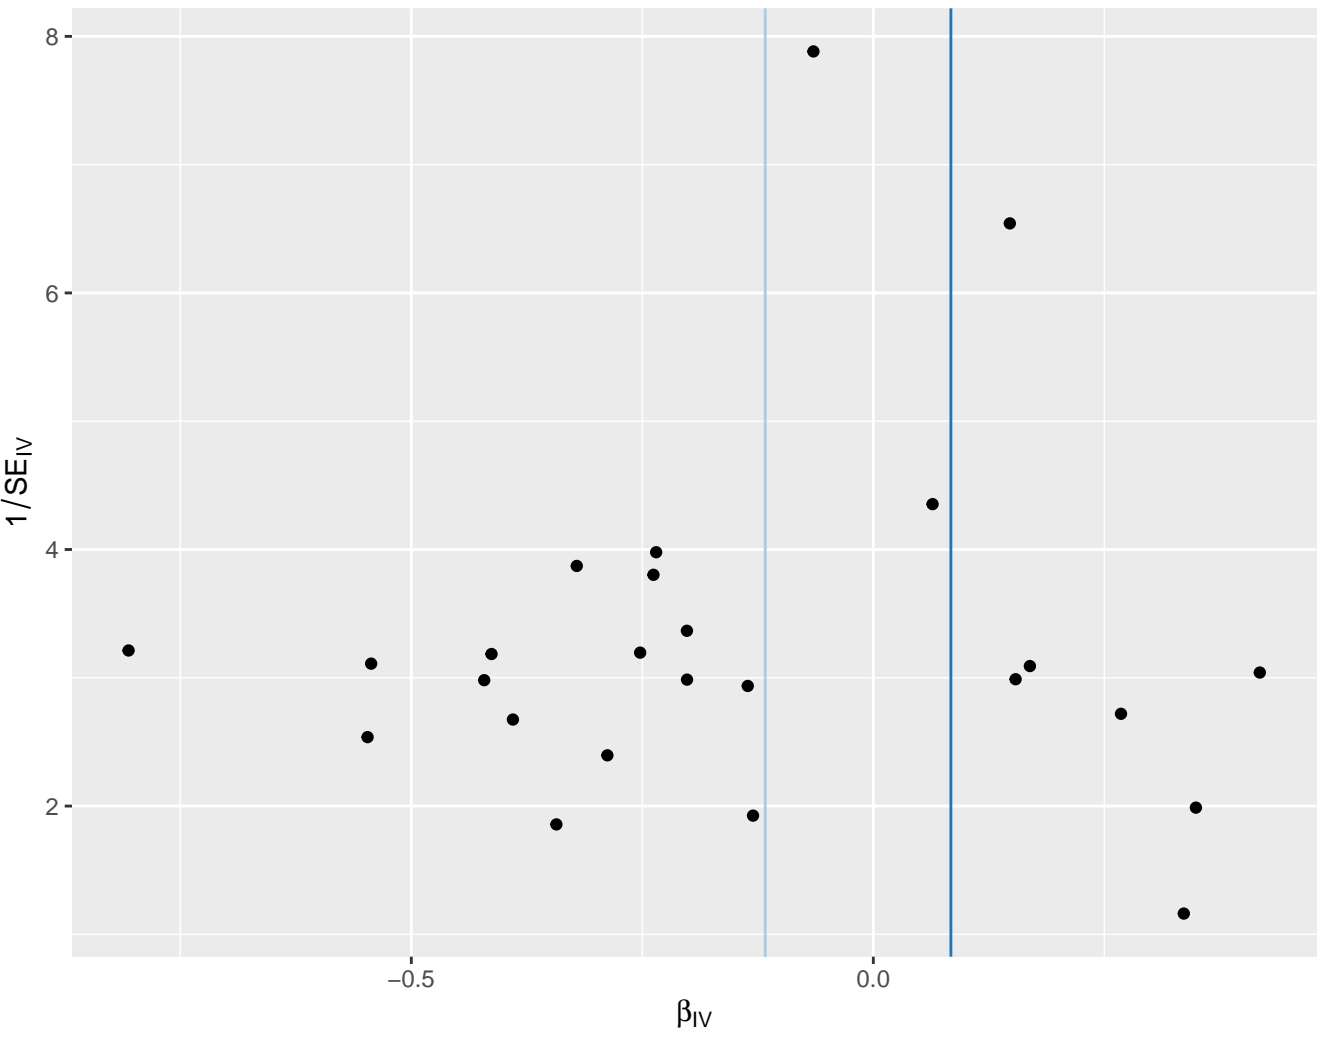

### MR Method

- Inverse variance weighted
- MR Egger

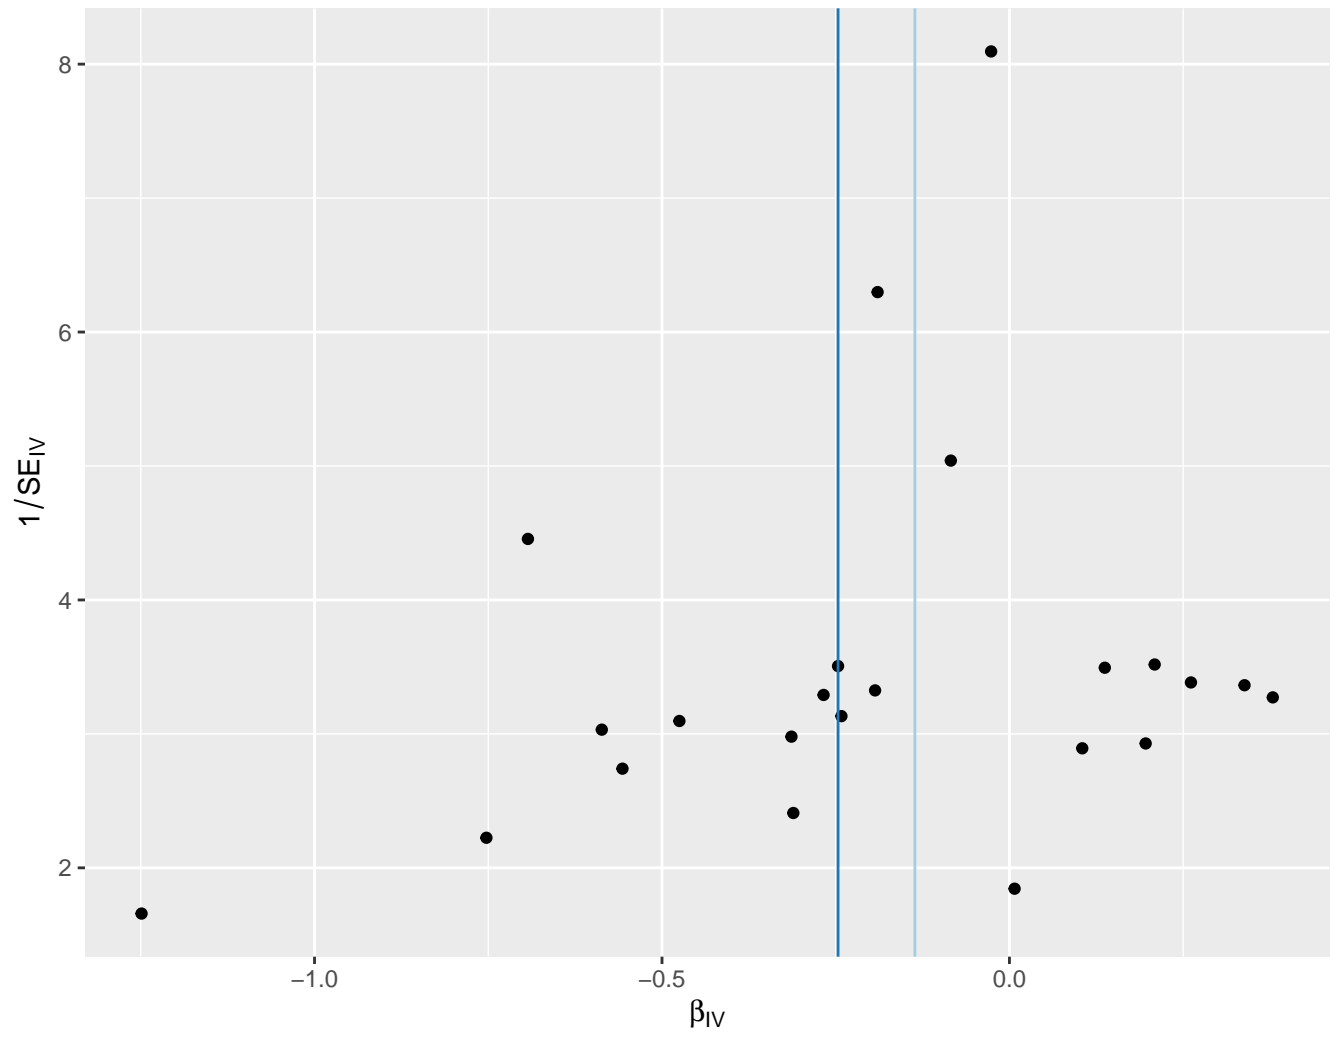

### MR Method

- Inverse variance weighted
- MR Egger

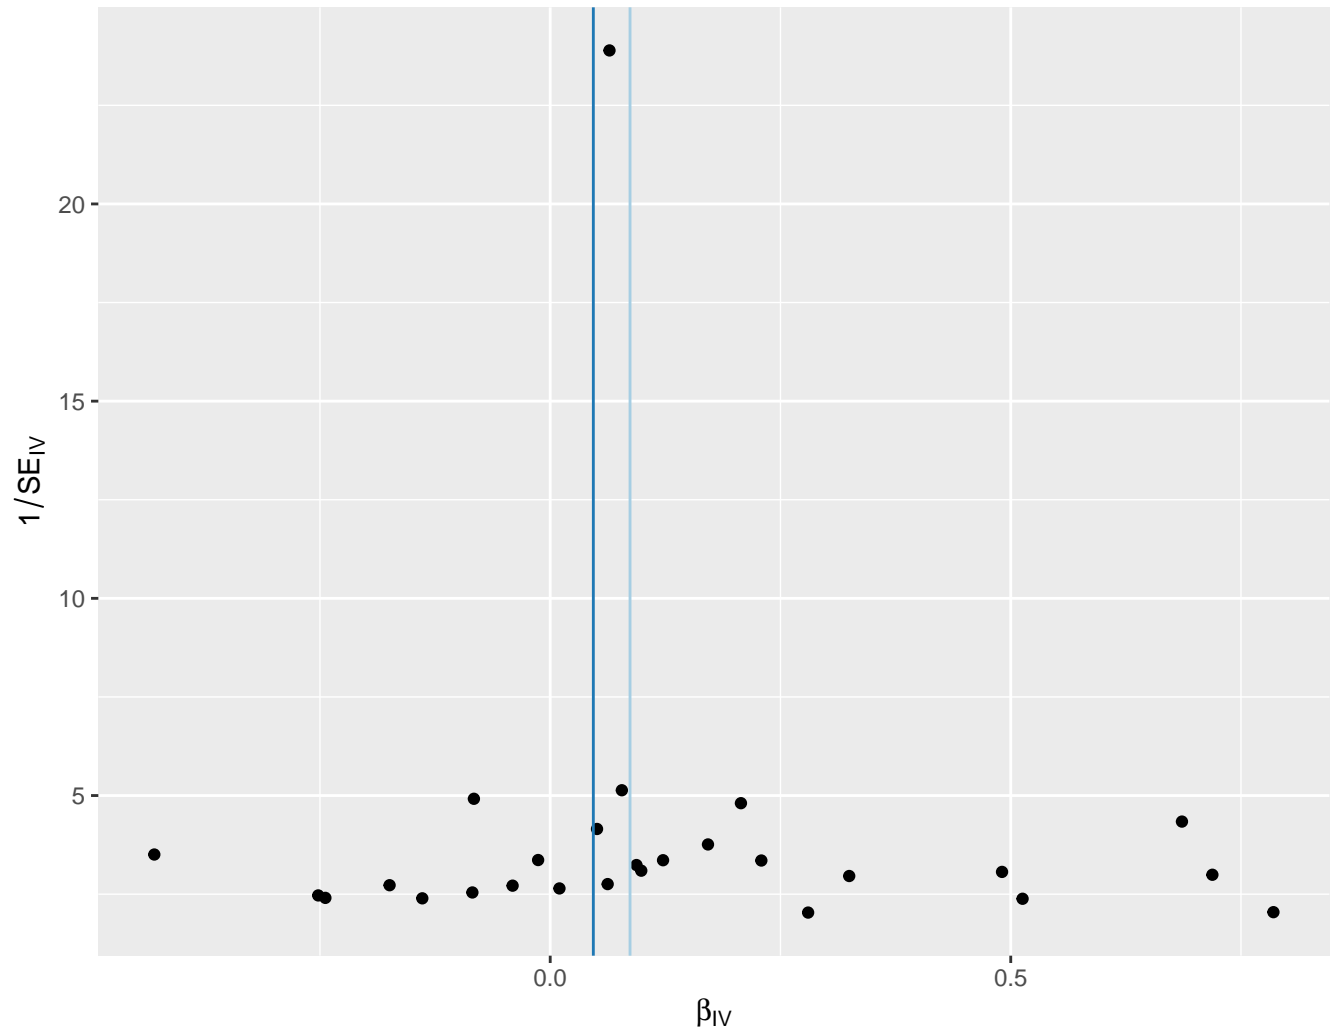

### MR Method

- Inverse variance weighted
- MR Egger

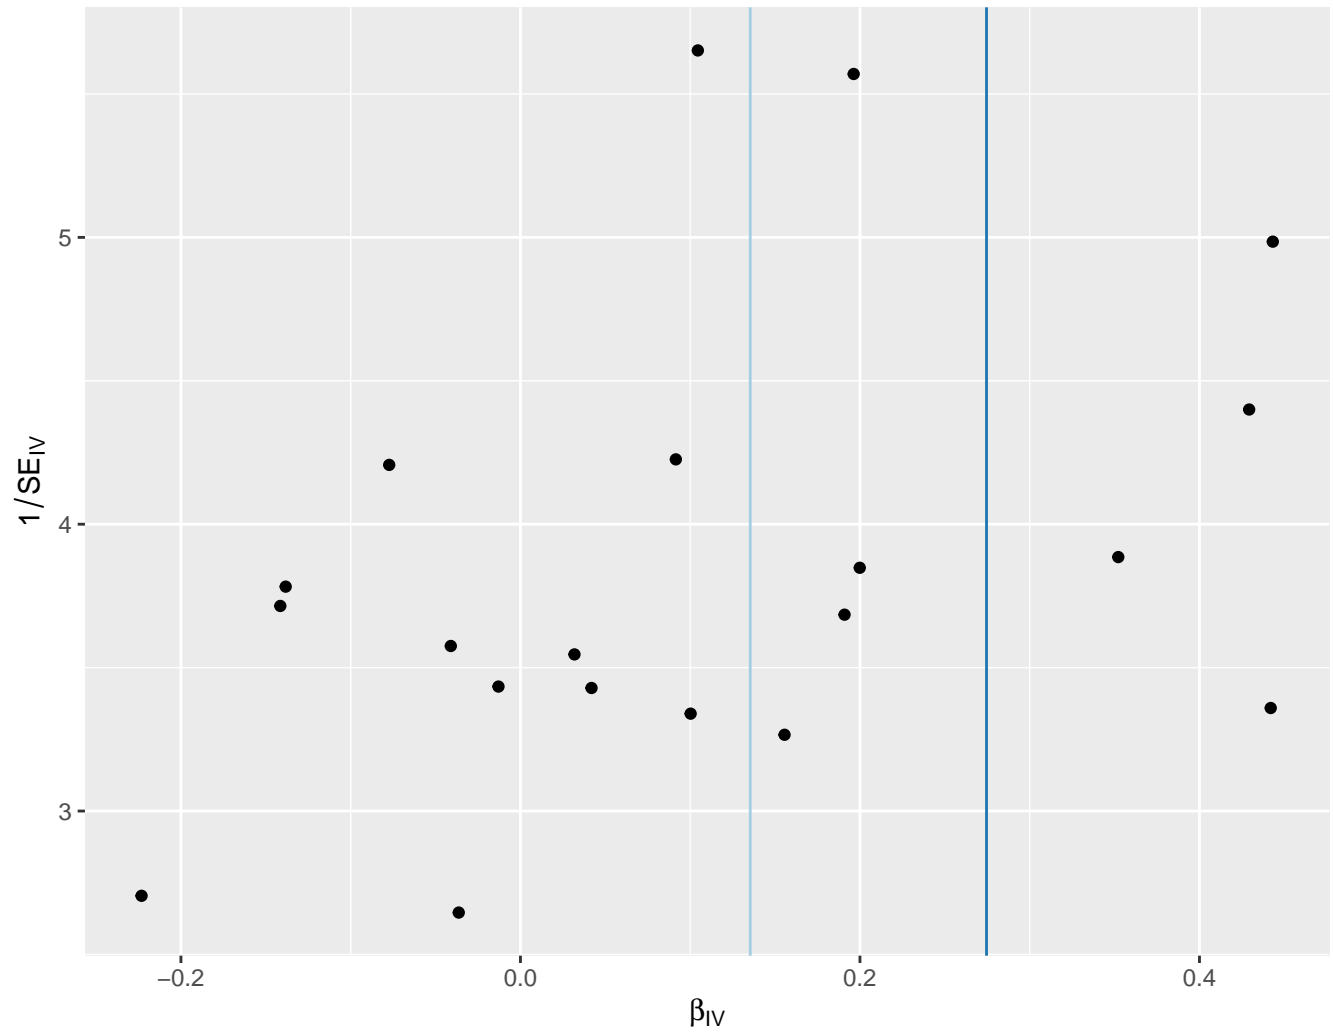

### MR Method

- Inverse variance weighted
- MR Egger

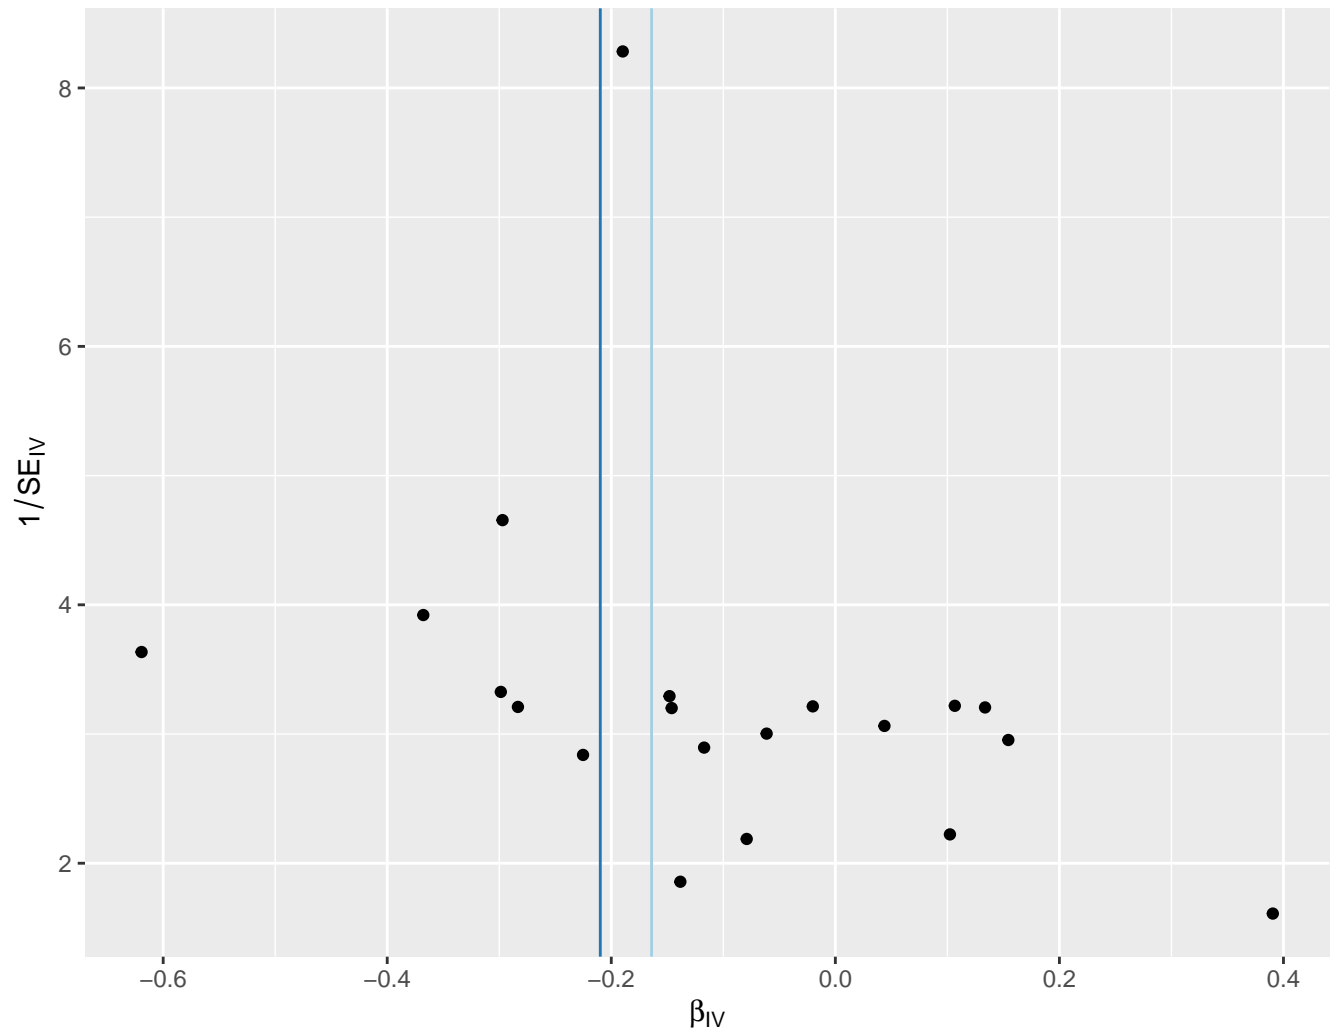

### MR Method

- Inverse variance weighted
- MR Egger

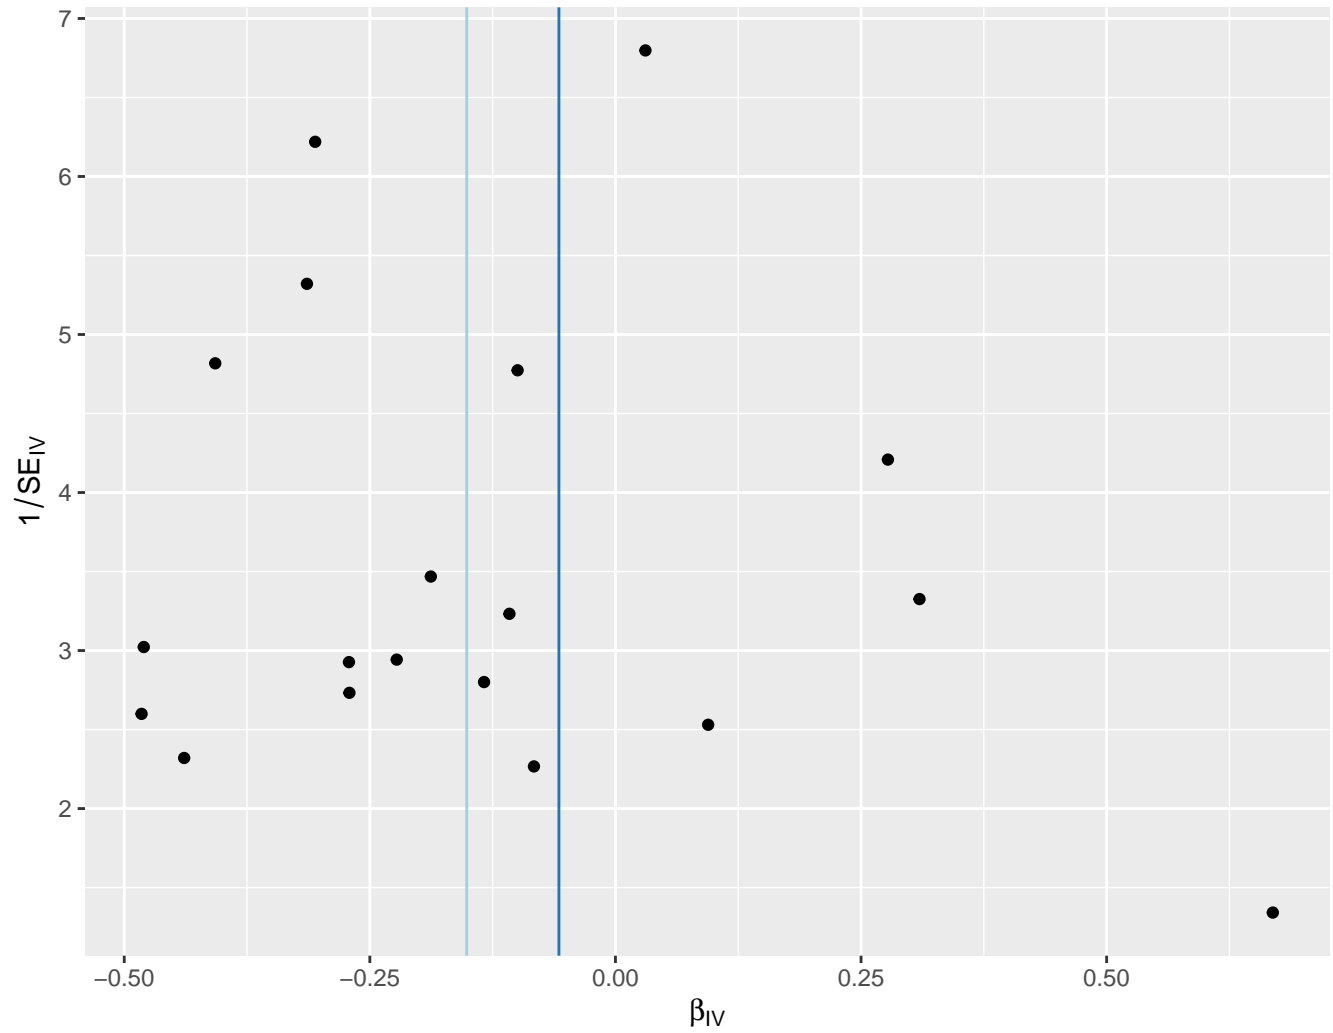

### MR Method

- Inverse variance weighted
- MR Egger

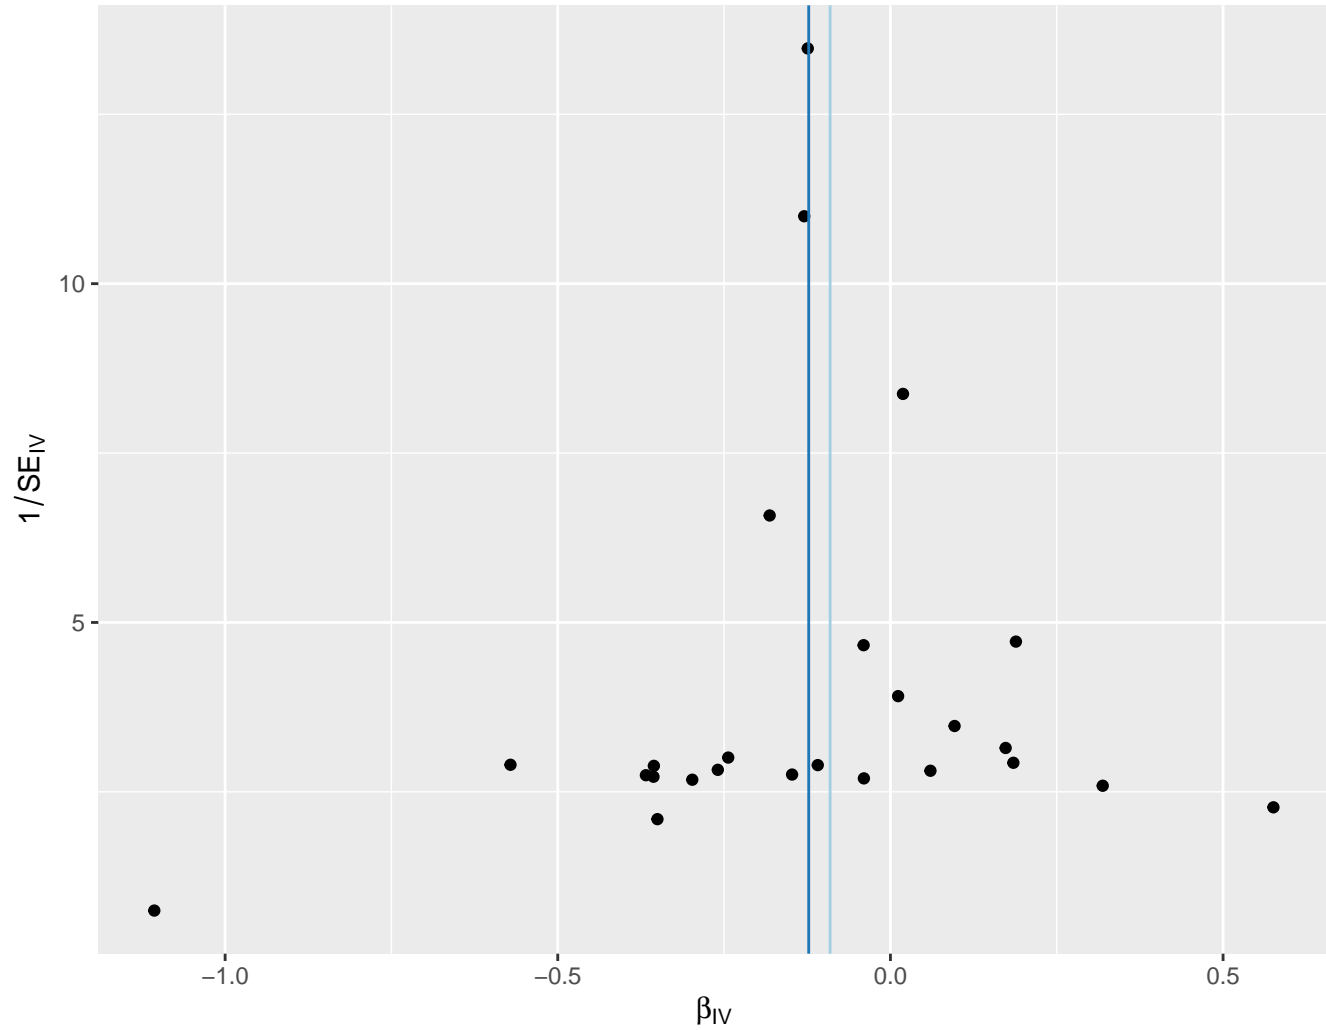



### MR Method

- Inverse variance weighted
- MR Egger

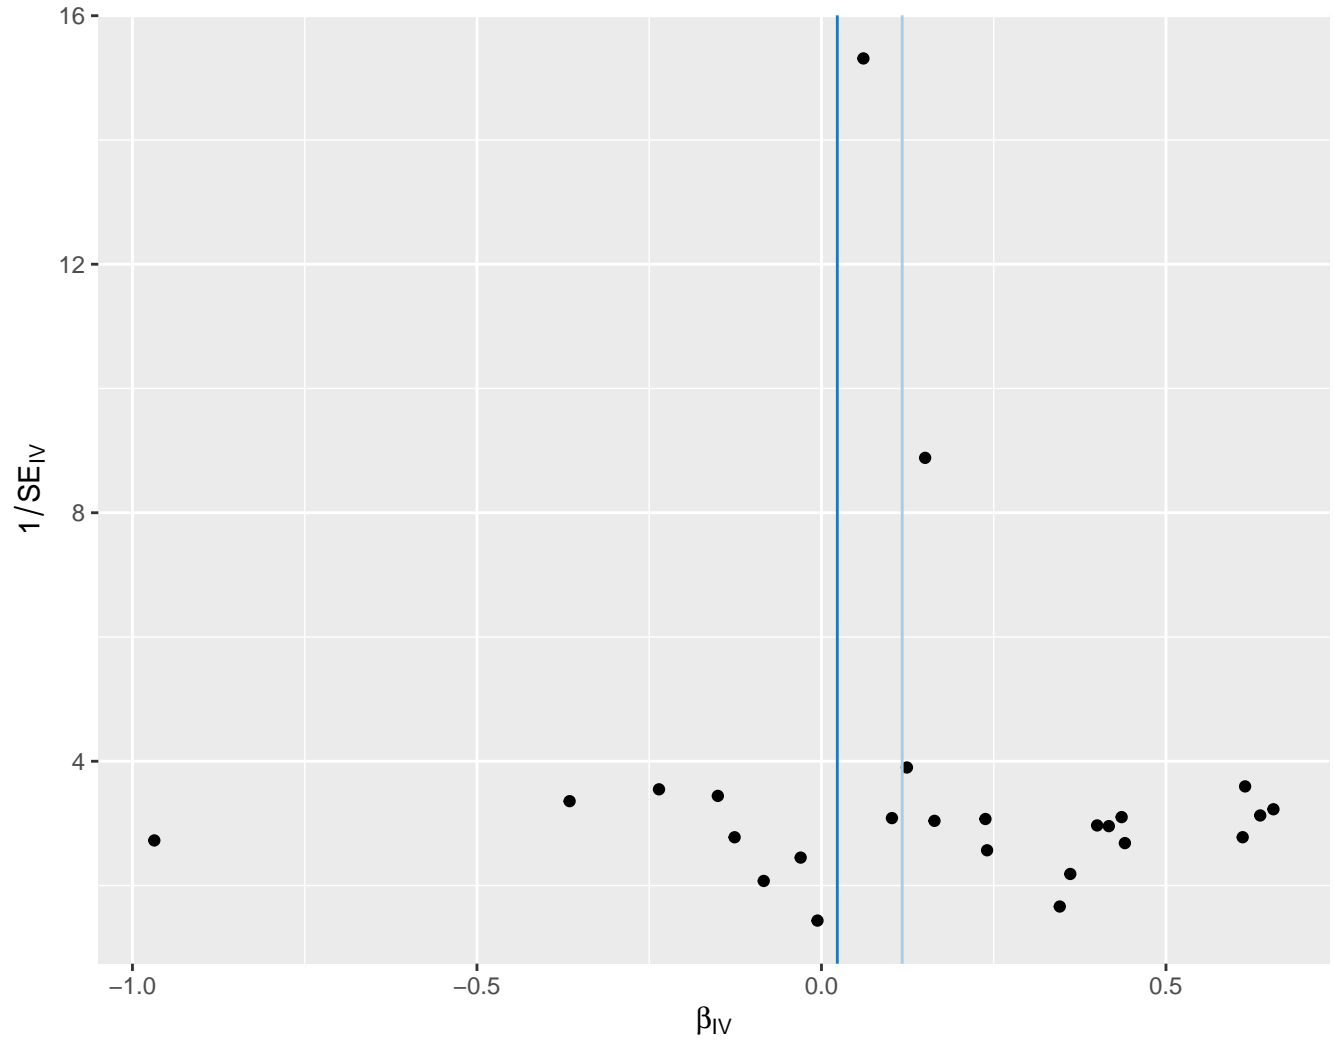

### MR Method

- Inverse variance weighted
- MR Egger

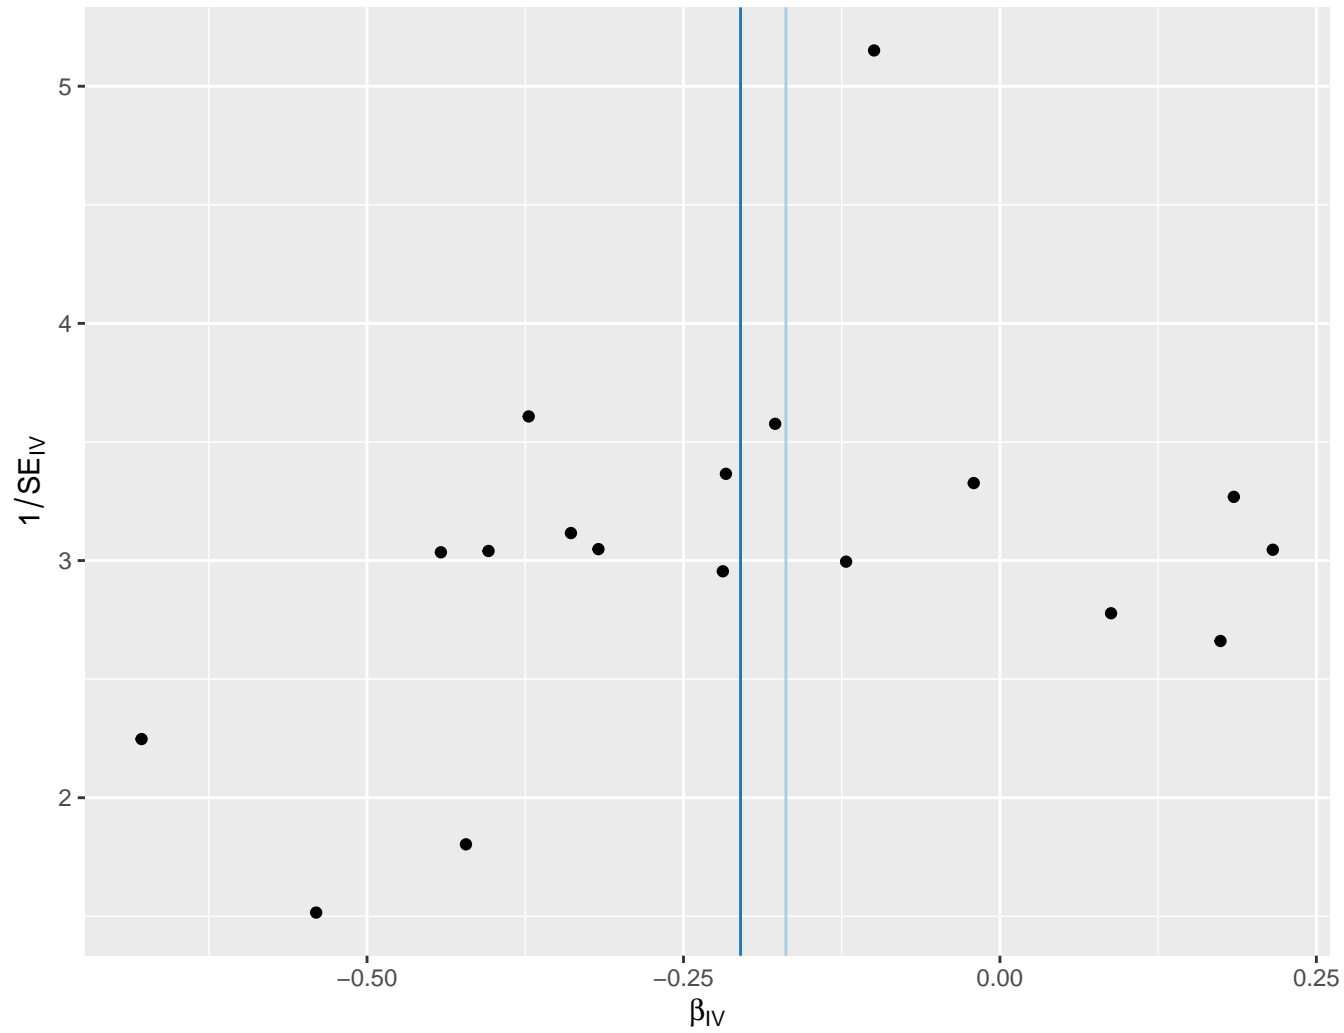

### MR Method

- Inverse variance weighted
- MR Egger

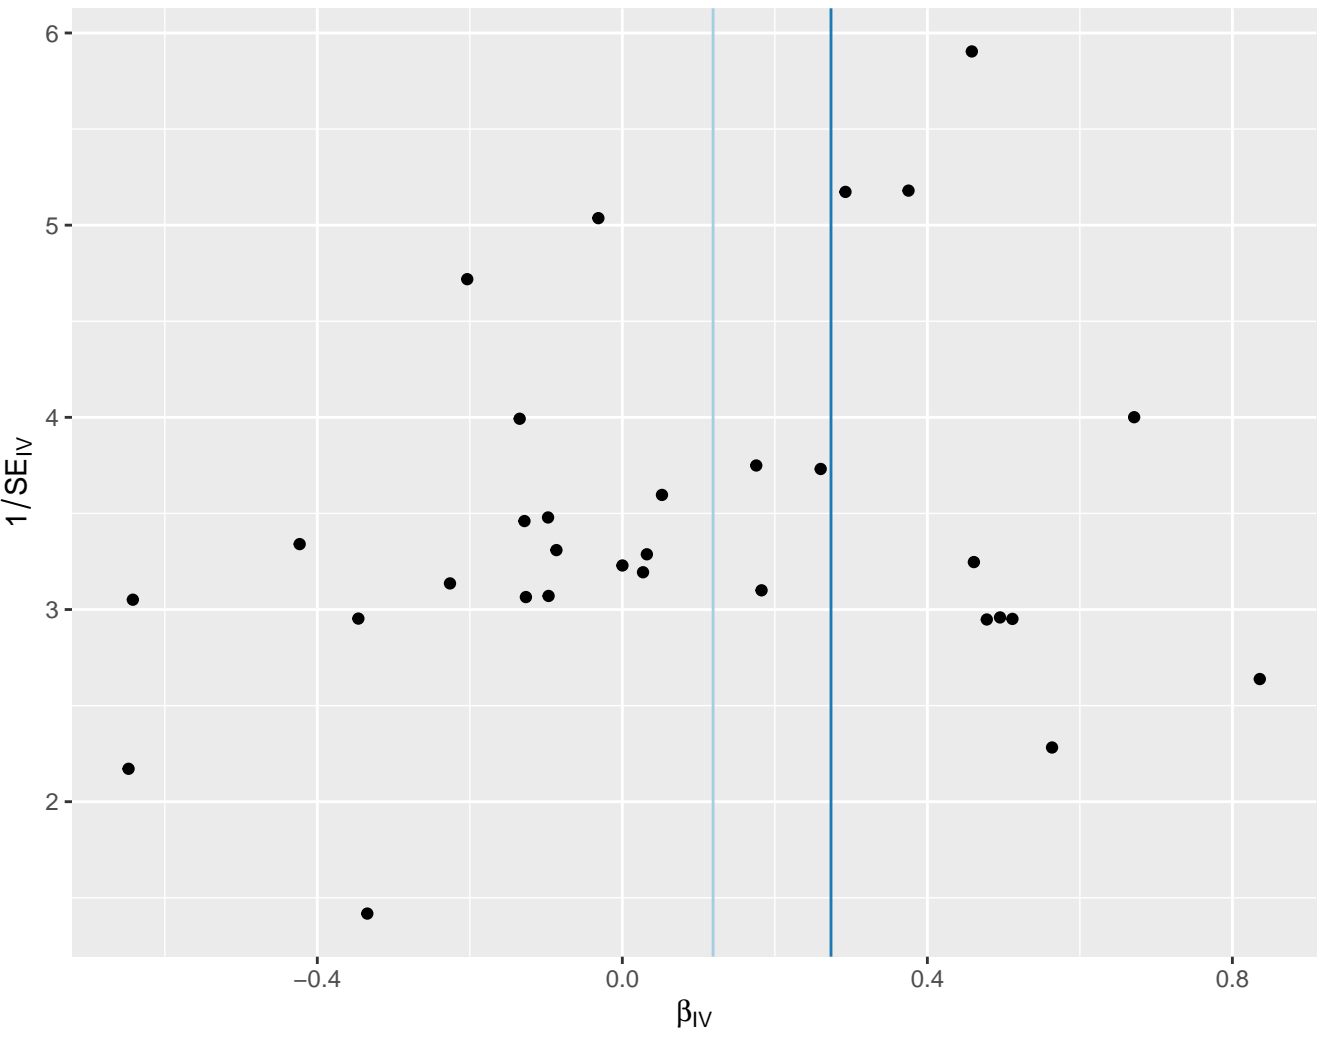

### MR Method

- Inverse variance weighted
- MR Egger

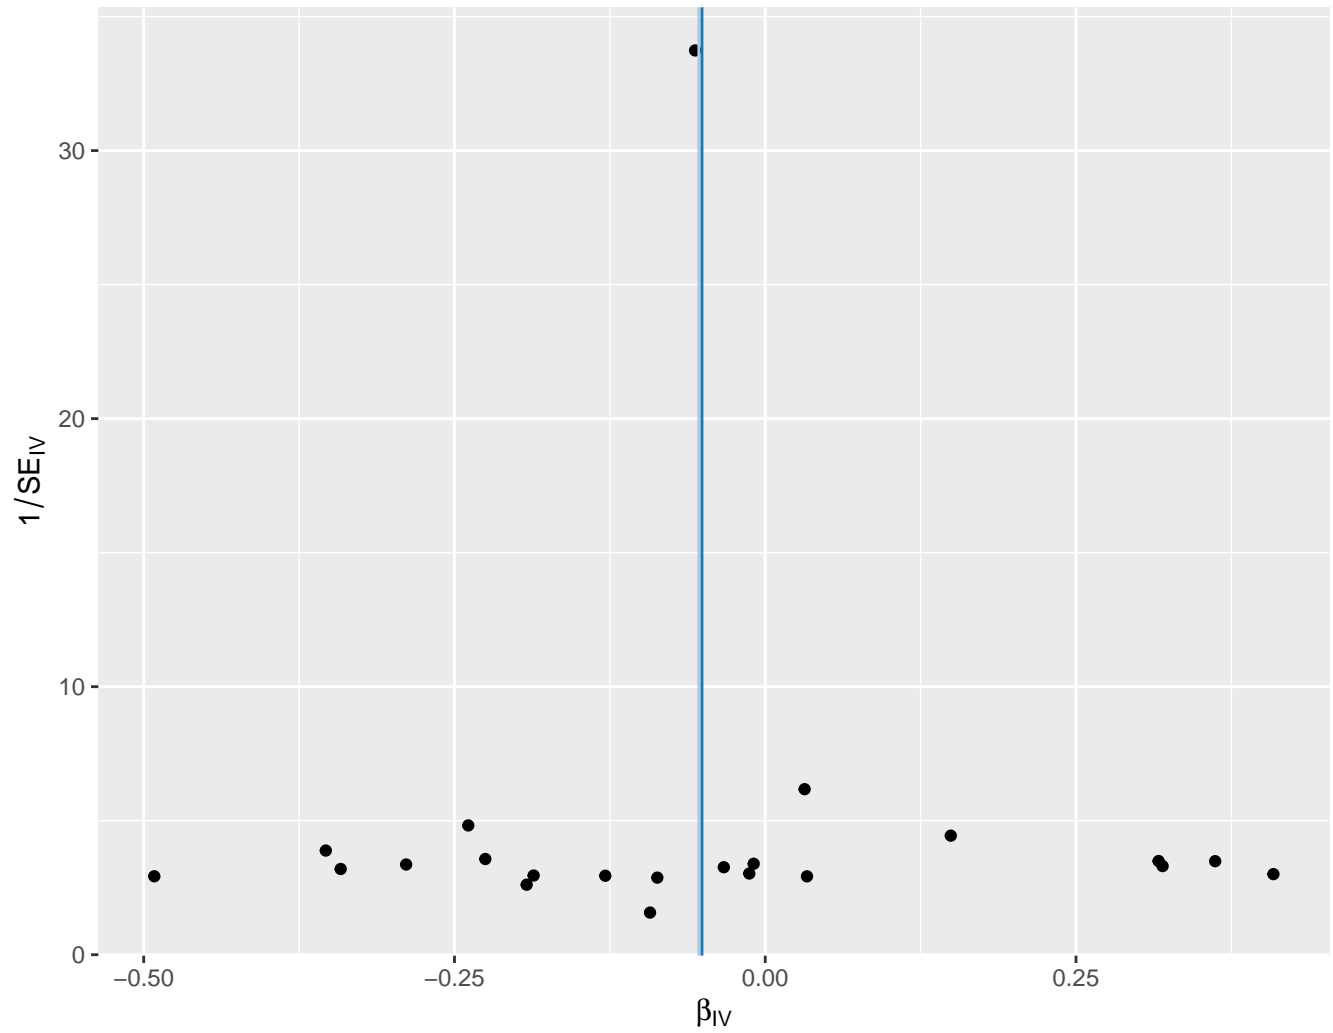

### MR Method

- Inverse variance weighted
- MR Egger

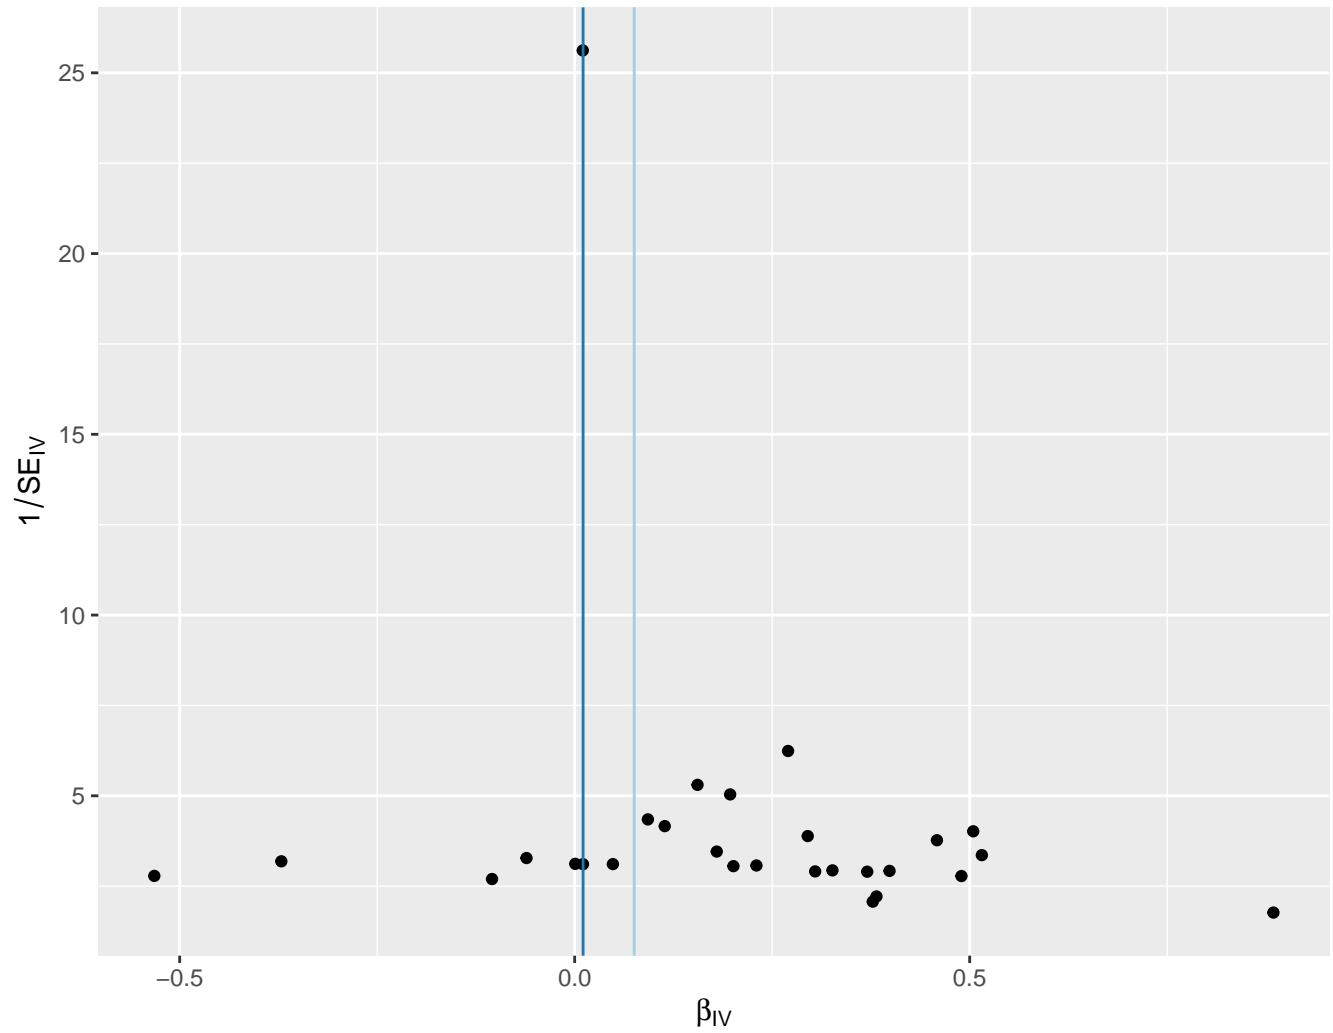

### MR Method

- Inverse variance weighted
- MR Egger

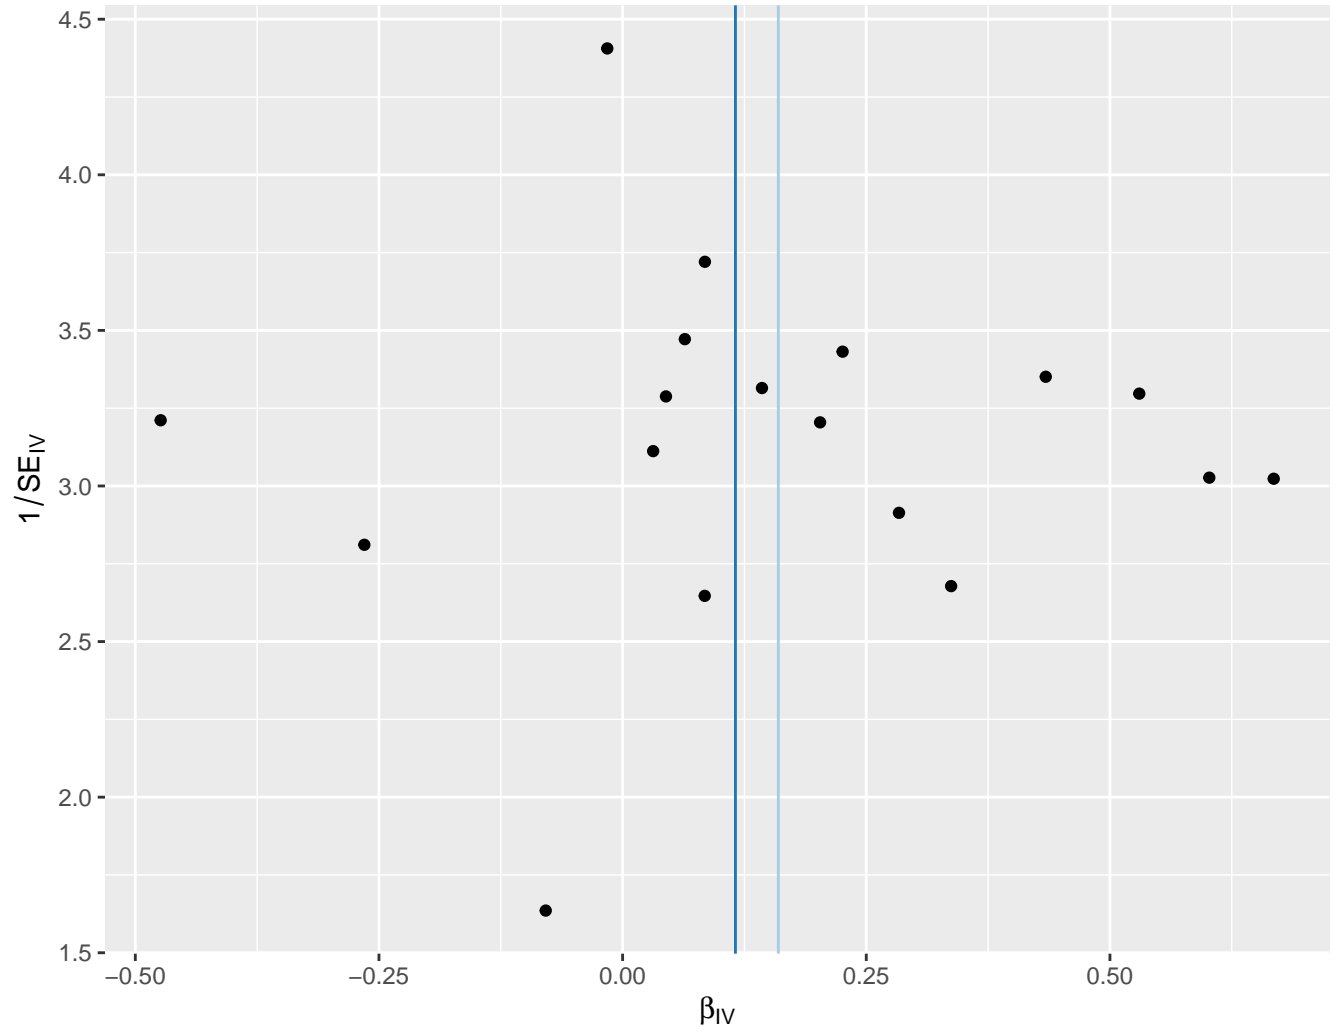

### MR Method

- Inverse variance weighted
- MR Egger

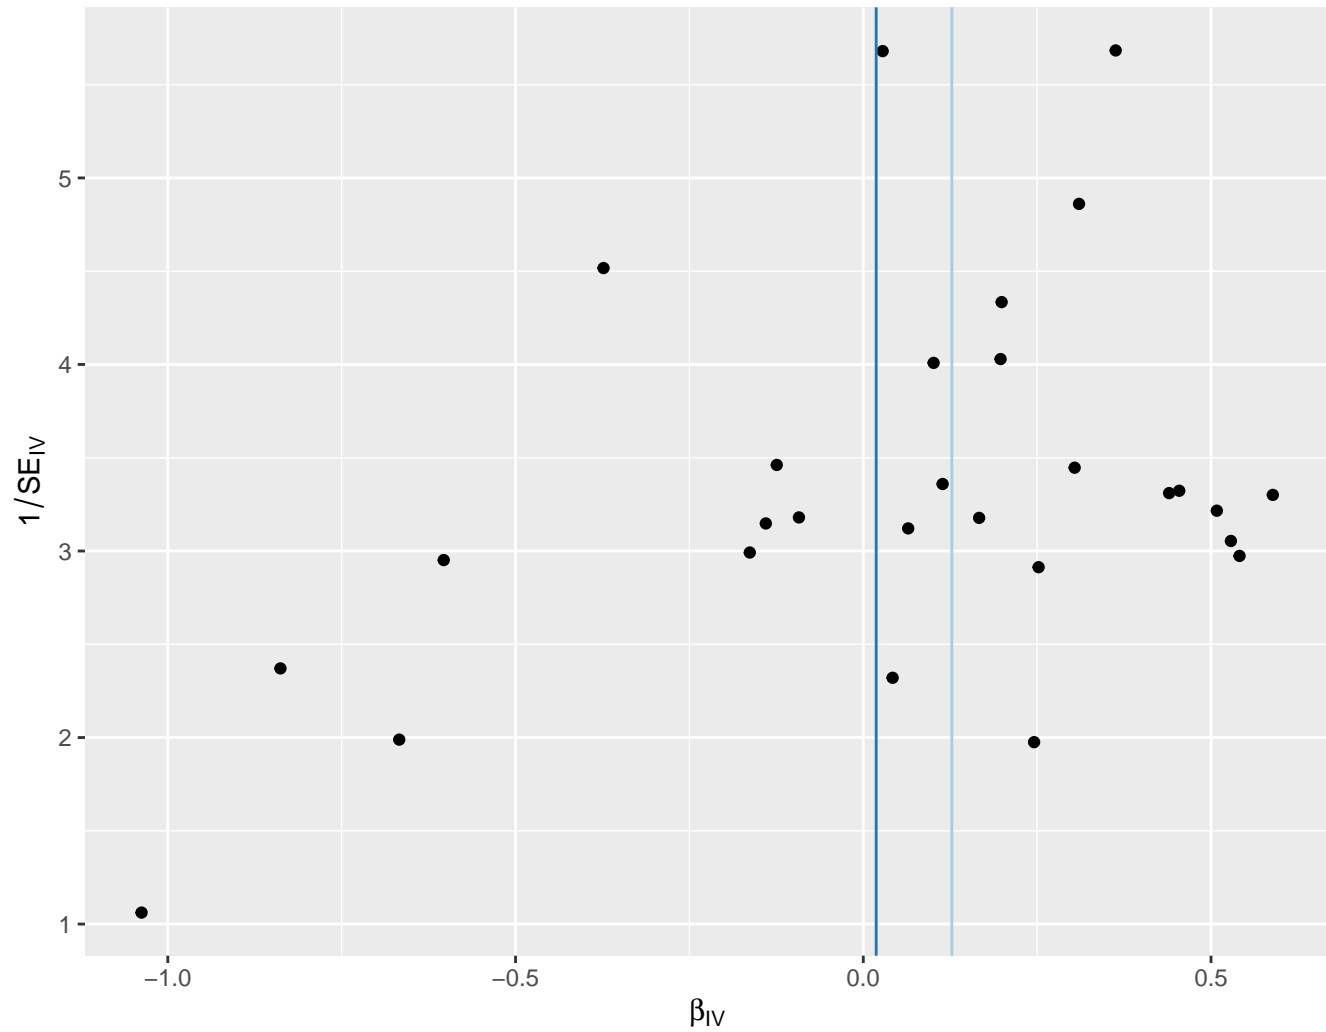

### MR Method

- Inverse variance weighted
- MR Egger

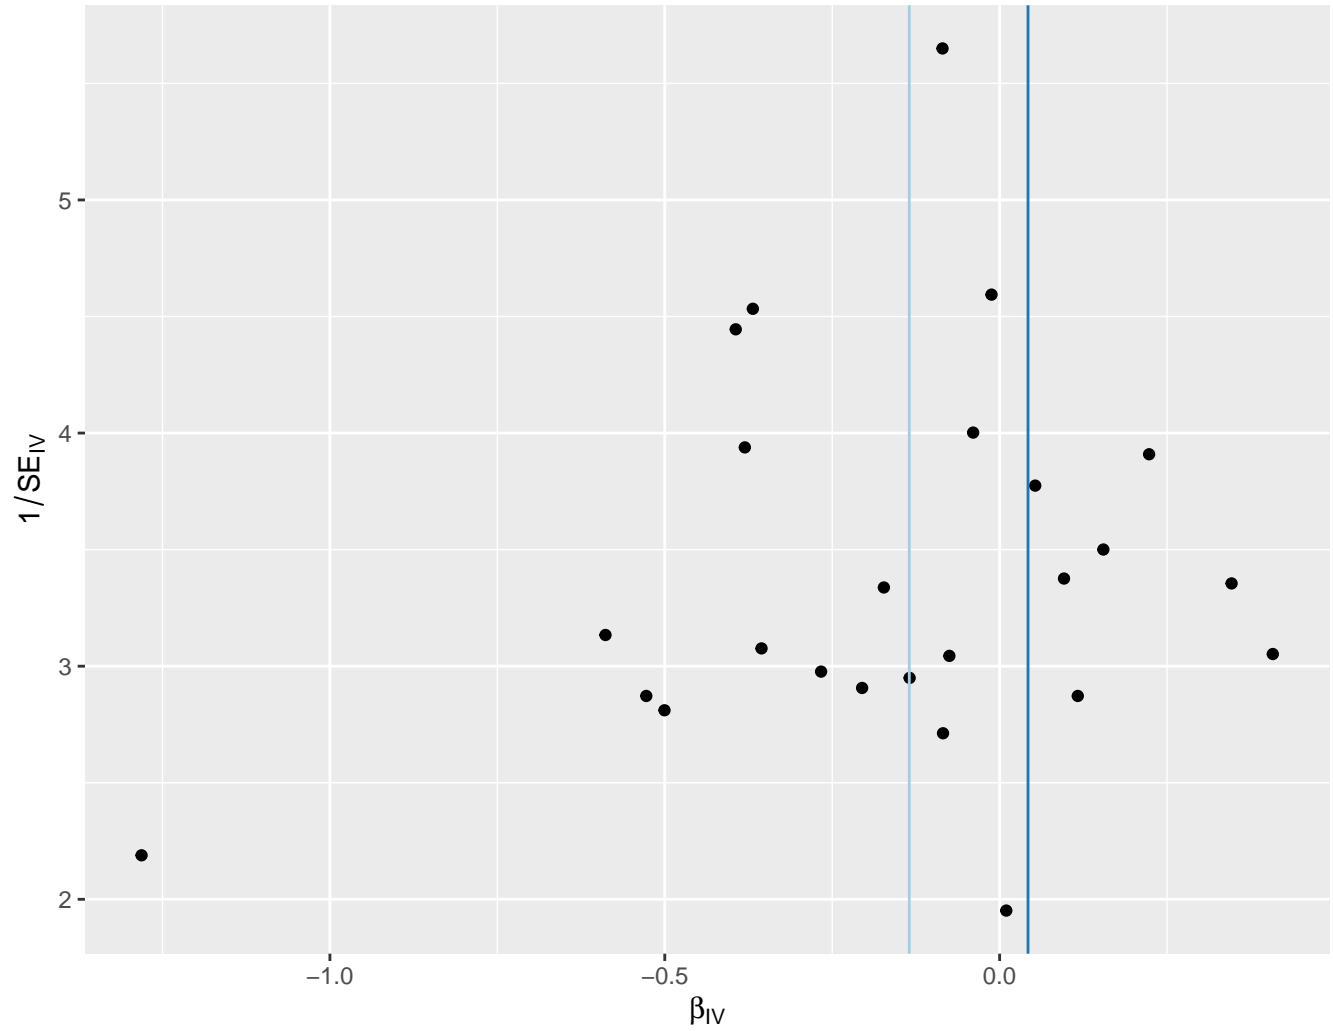

### MR Method

- Inverse variance weighted
- MR Egger

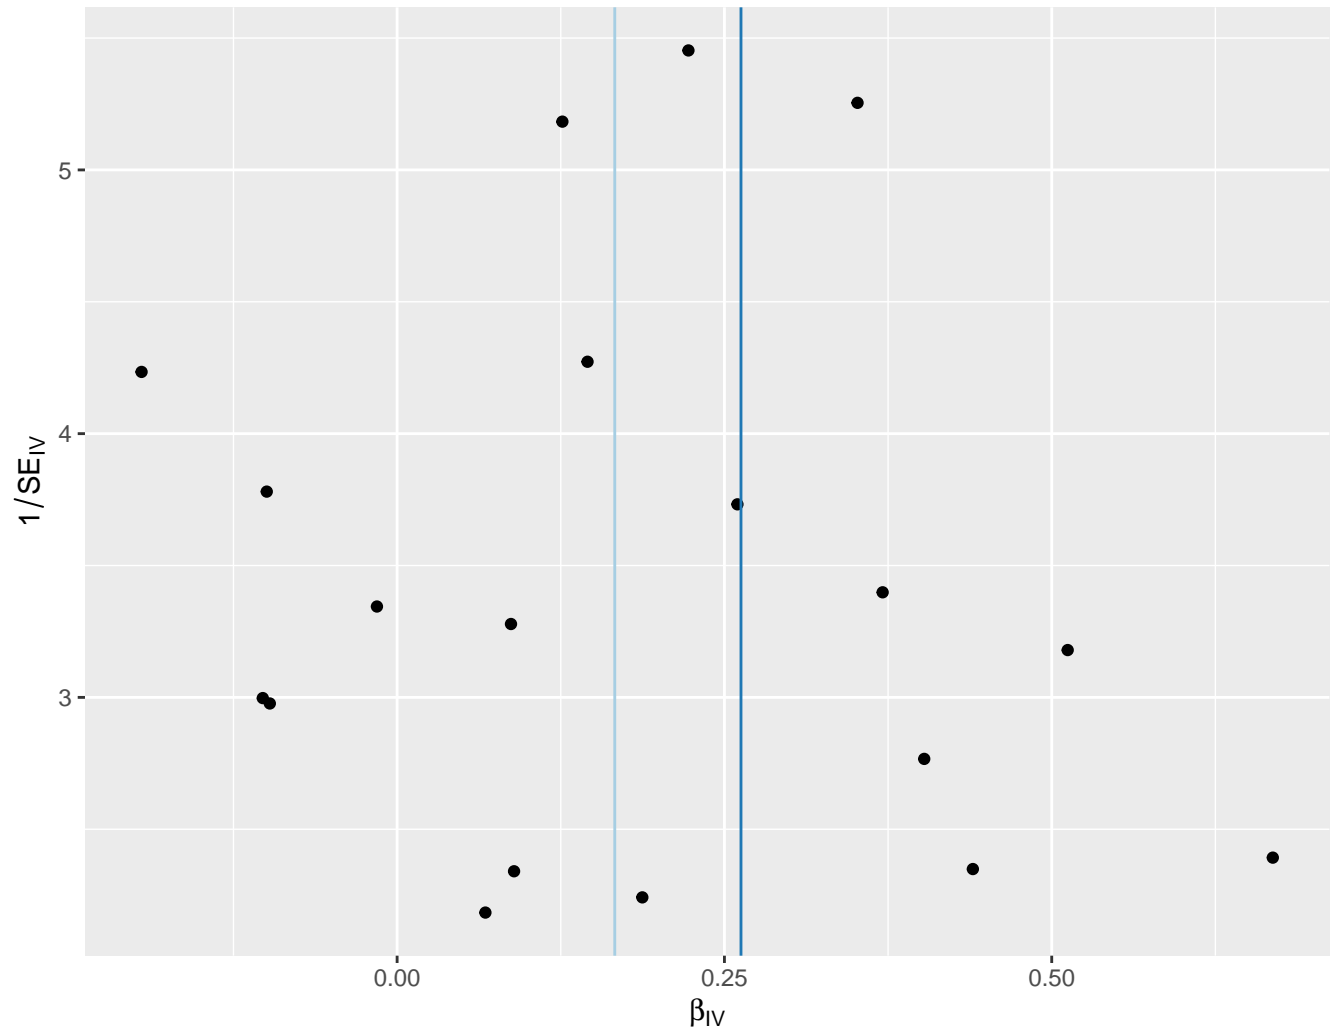

### MR Method

- Inverse variance weighted
- MR Egger

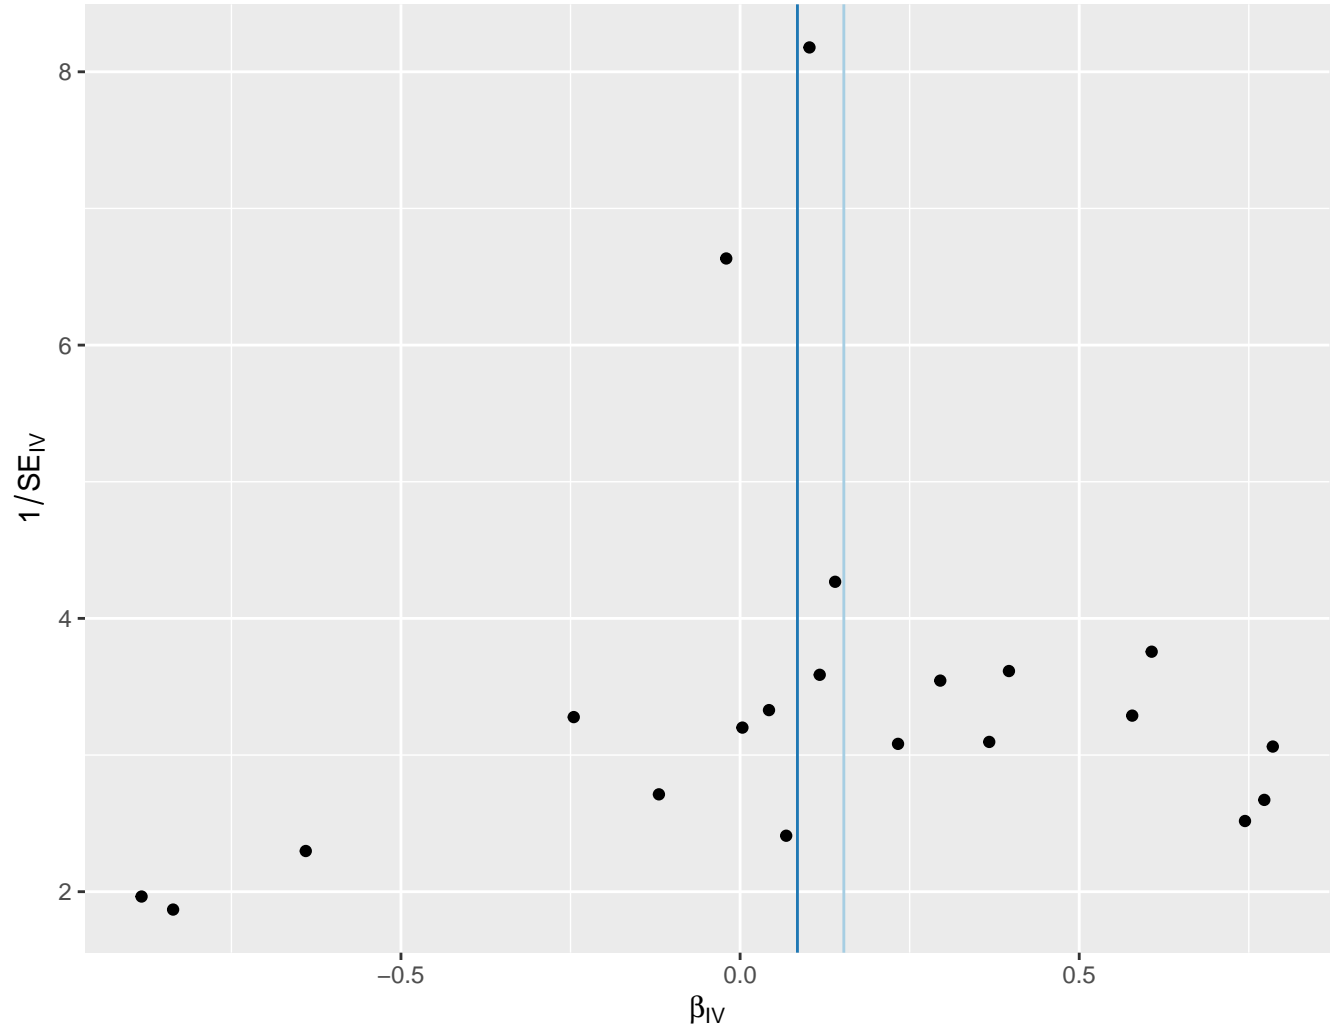

### MR Method

- Inverse variance weighted
- MR Egger

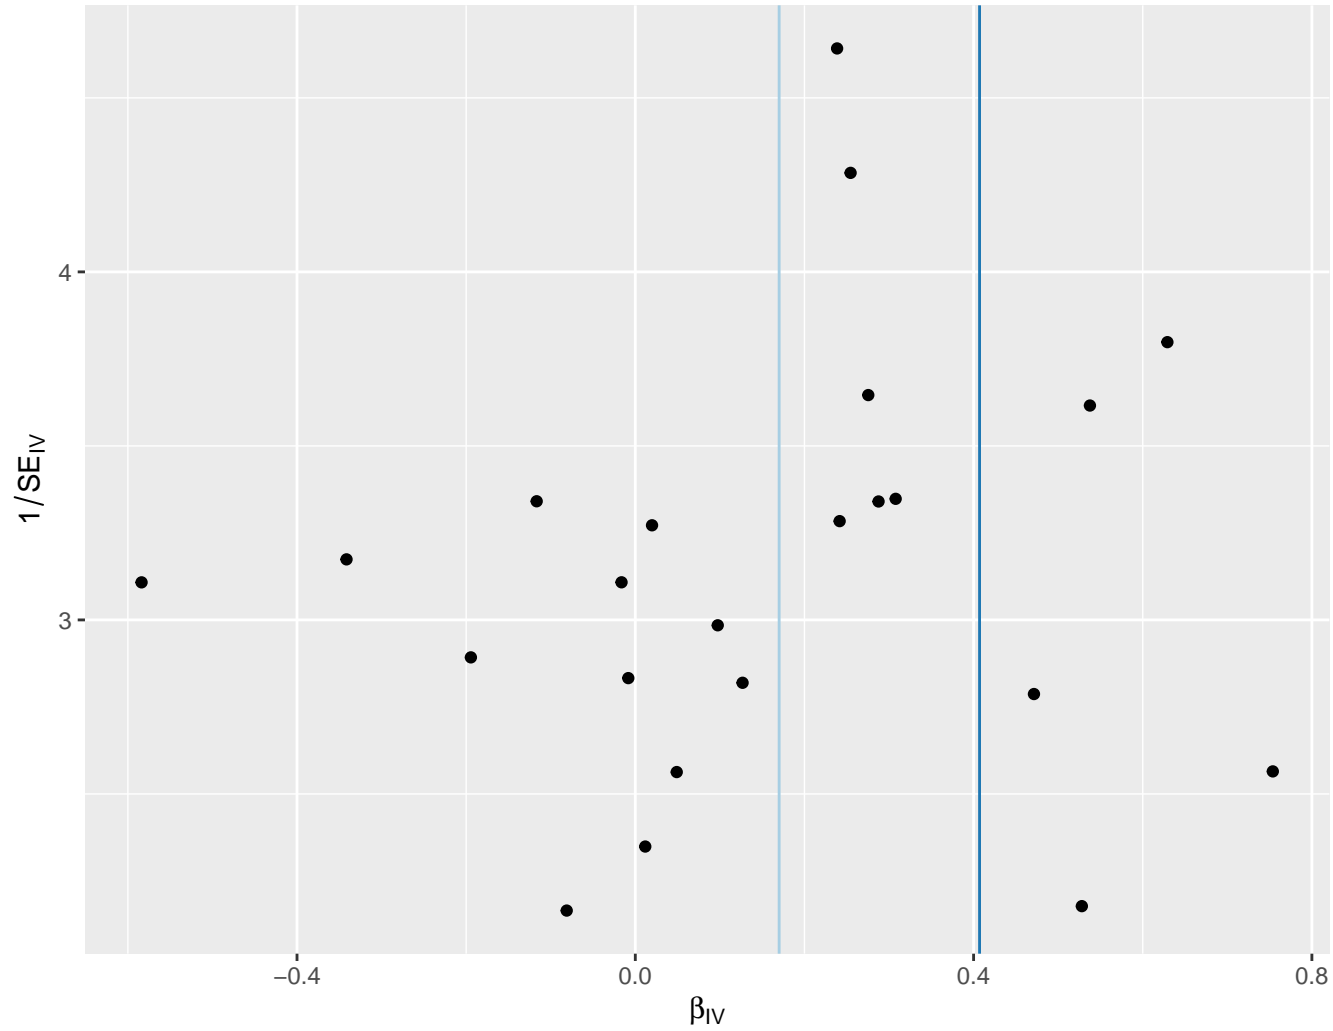

### MR Method

- Inverse variance weighted
- MR Egger

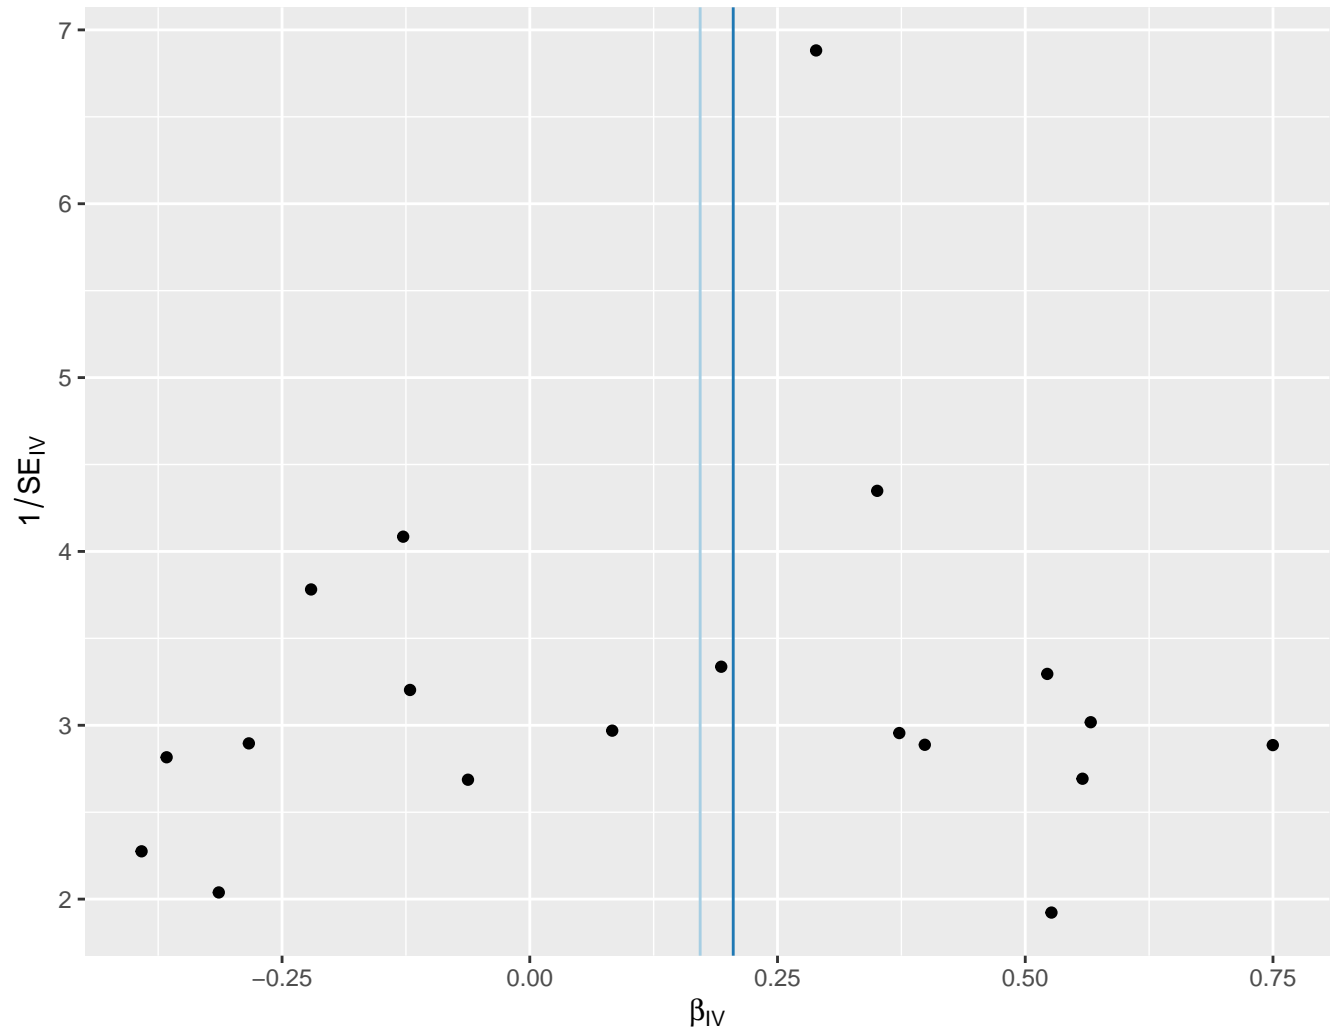

### MR Method

- Inverse variance weighted
- MR Egger

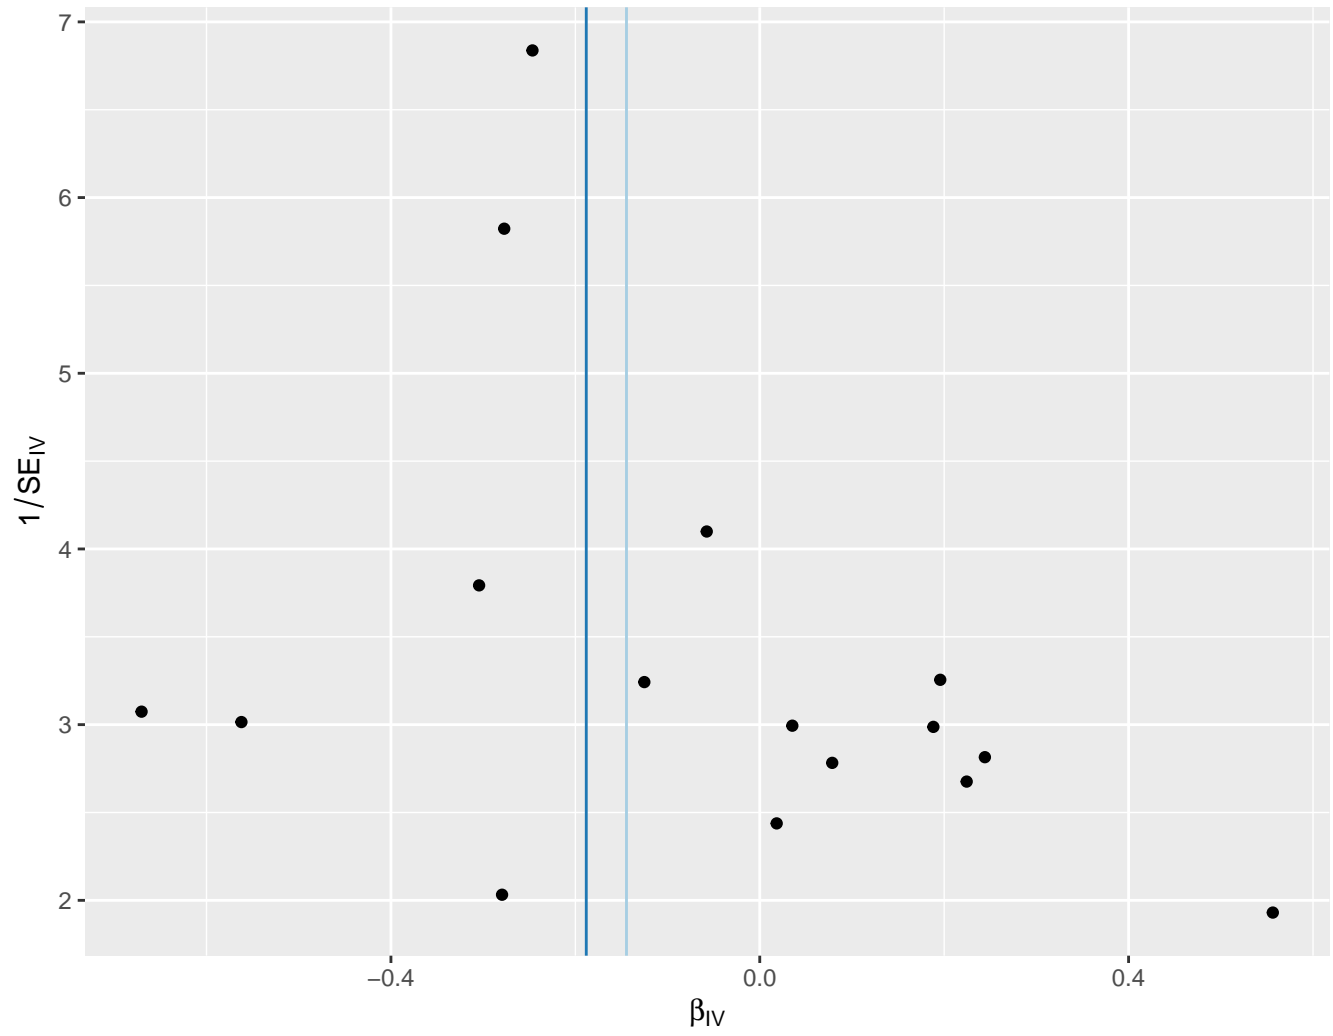

### MR Method

- Inverse variance weighted
- MR Egger

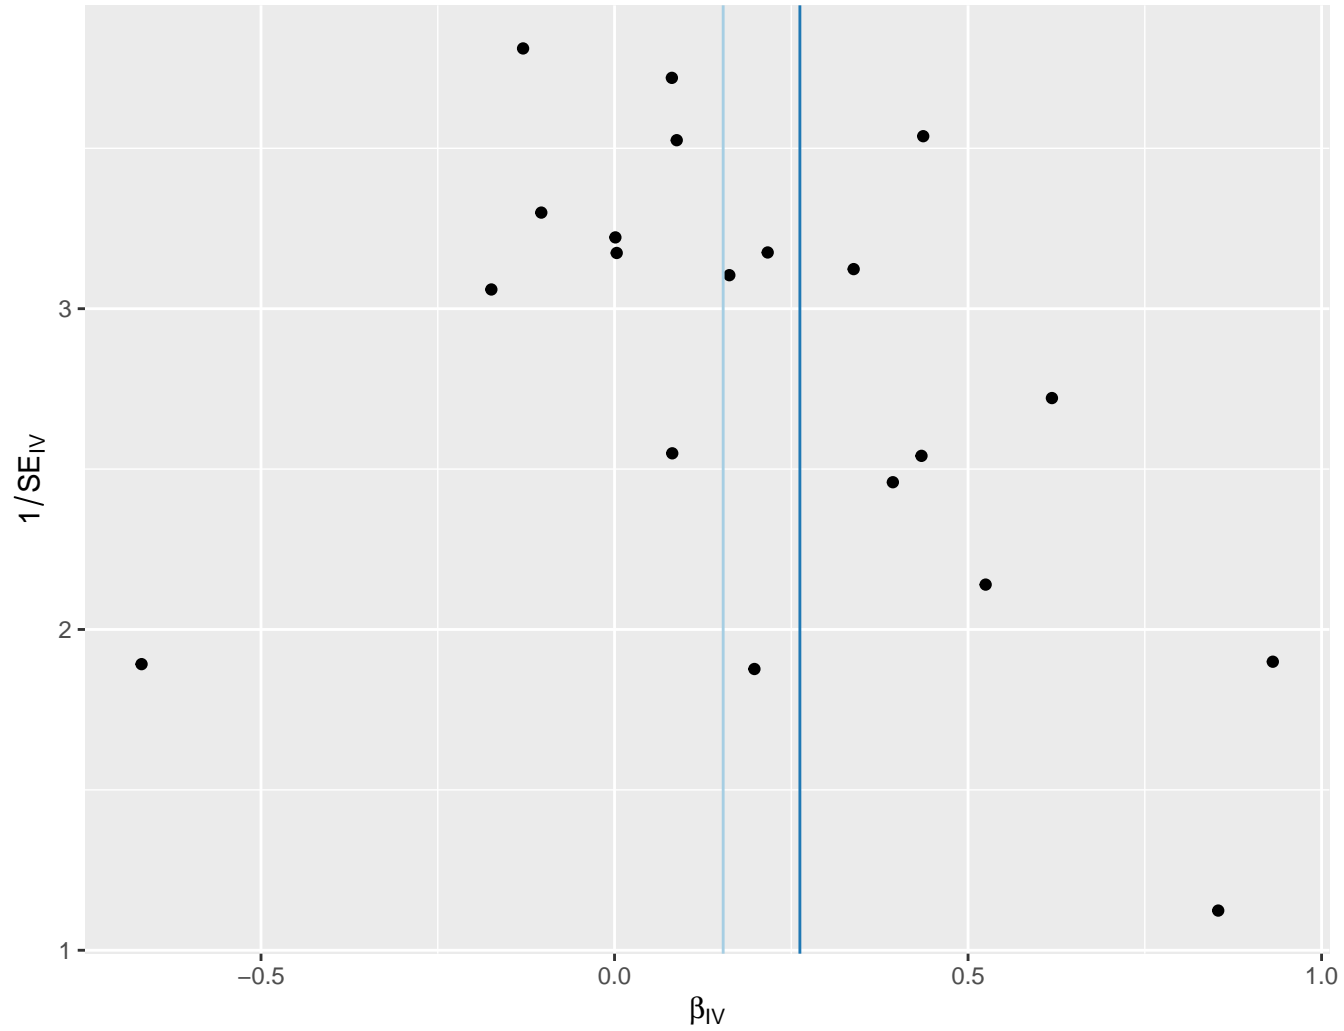

### MR Method

- Inverse variance weighted
- MR Egger

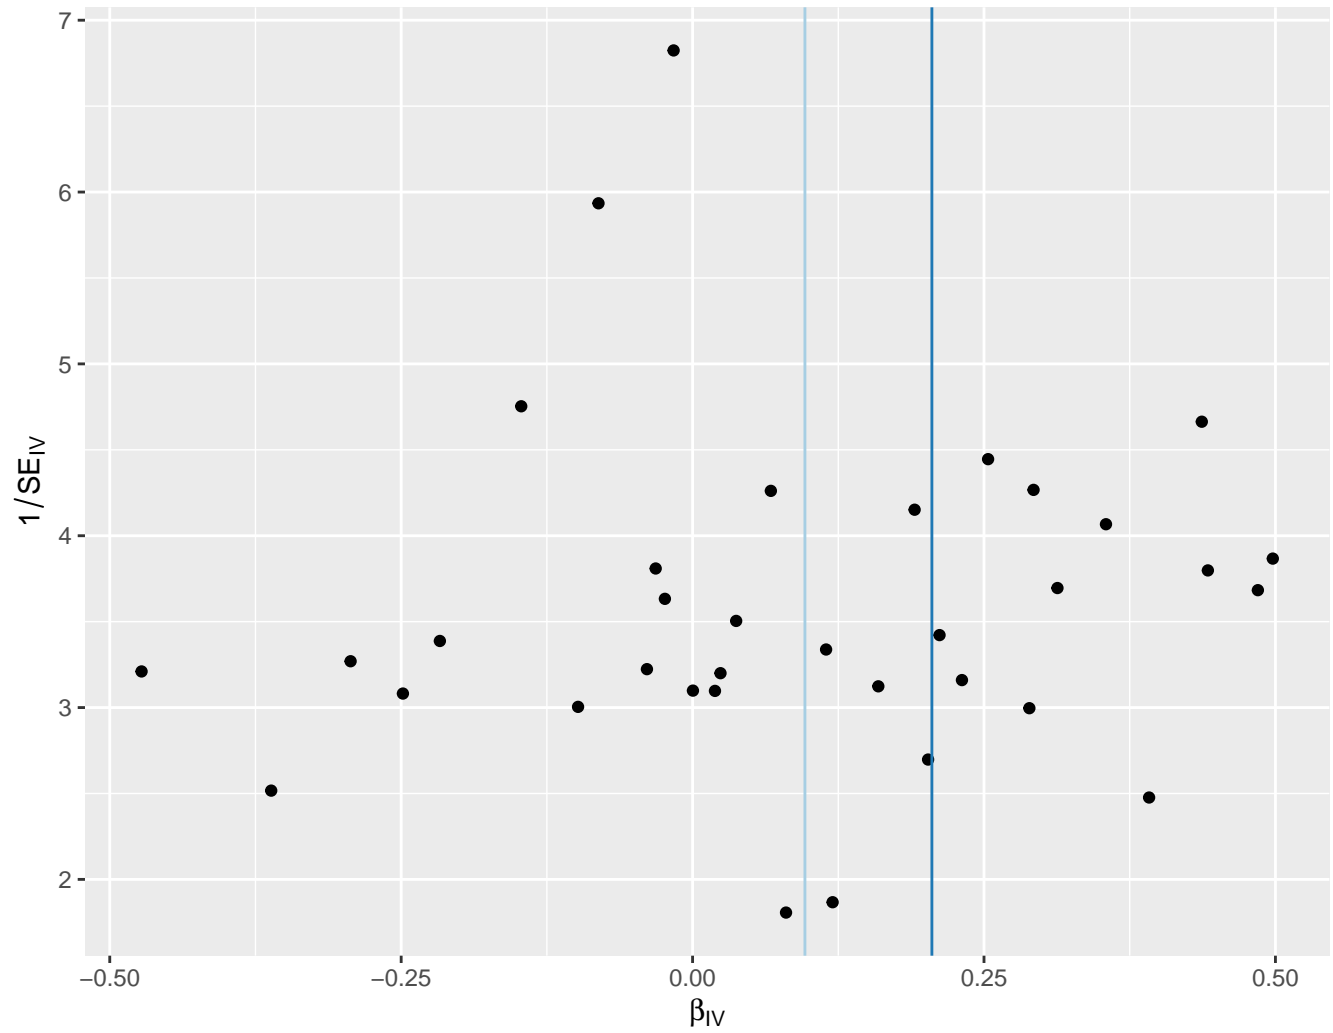



### MR Method

- Inverse variance weighted
- MR Egger

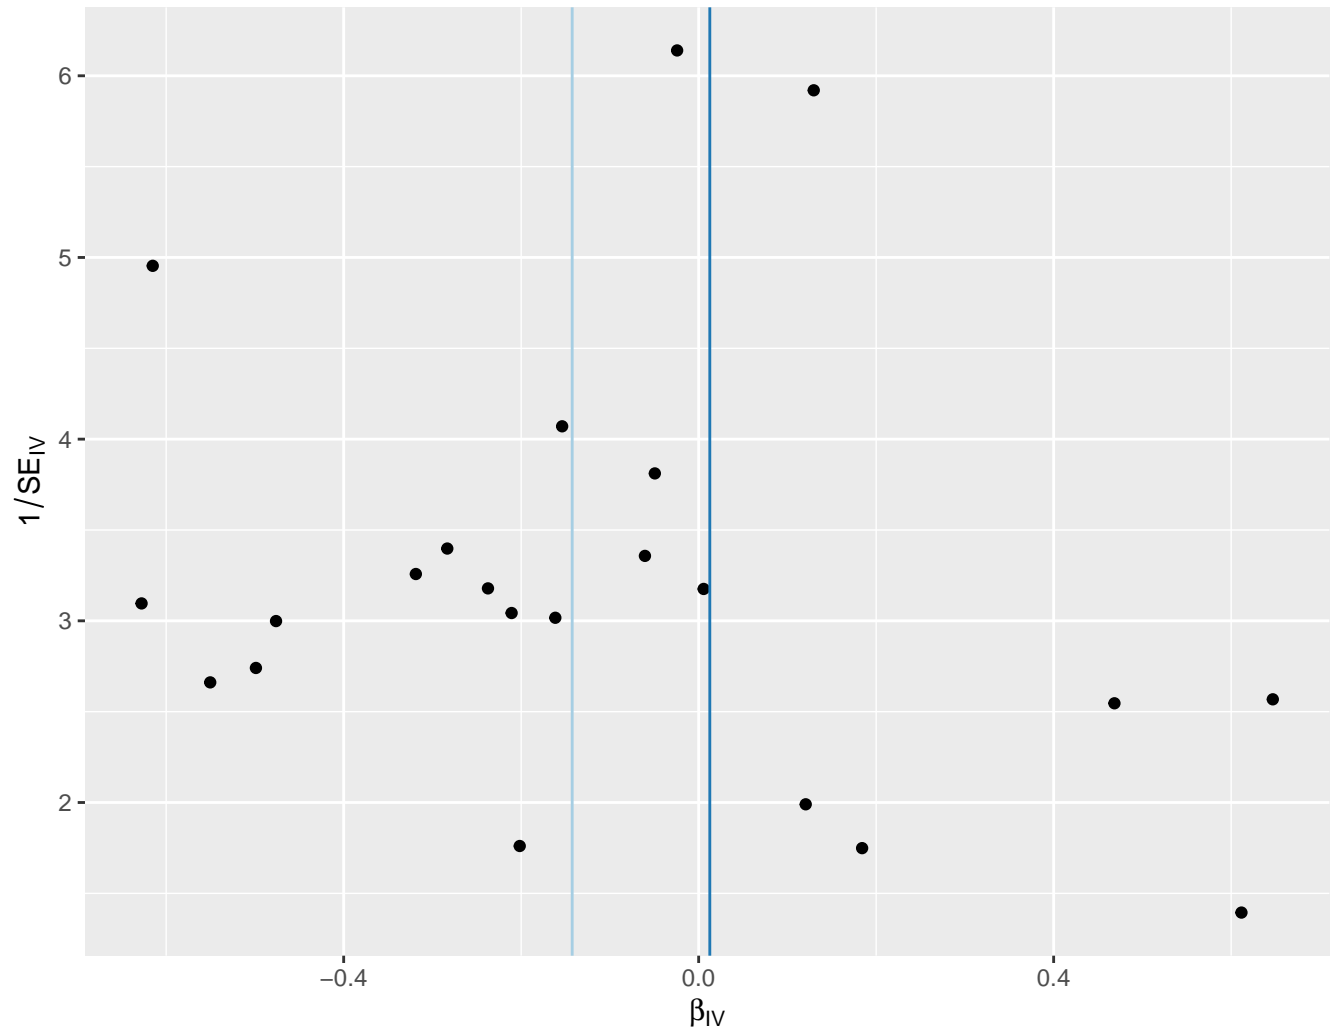

Supplement: Supplementary file 4 [file Figure S3.pdf › Figure S3.pdf]
