# Supplementary material
Source: publisher site journal article supplement (https://www.dovepress.com/article/538895)

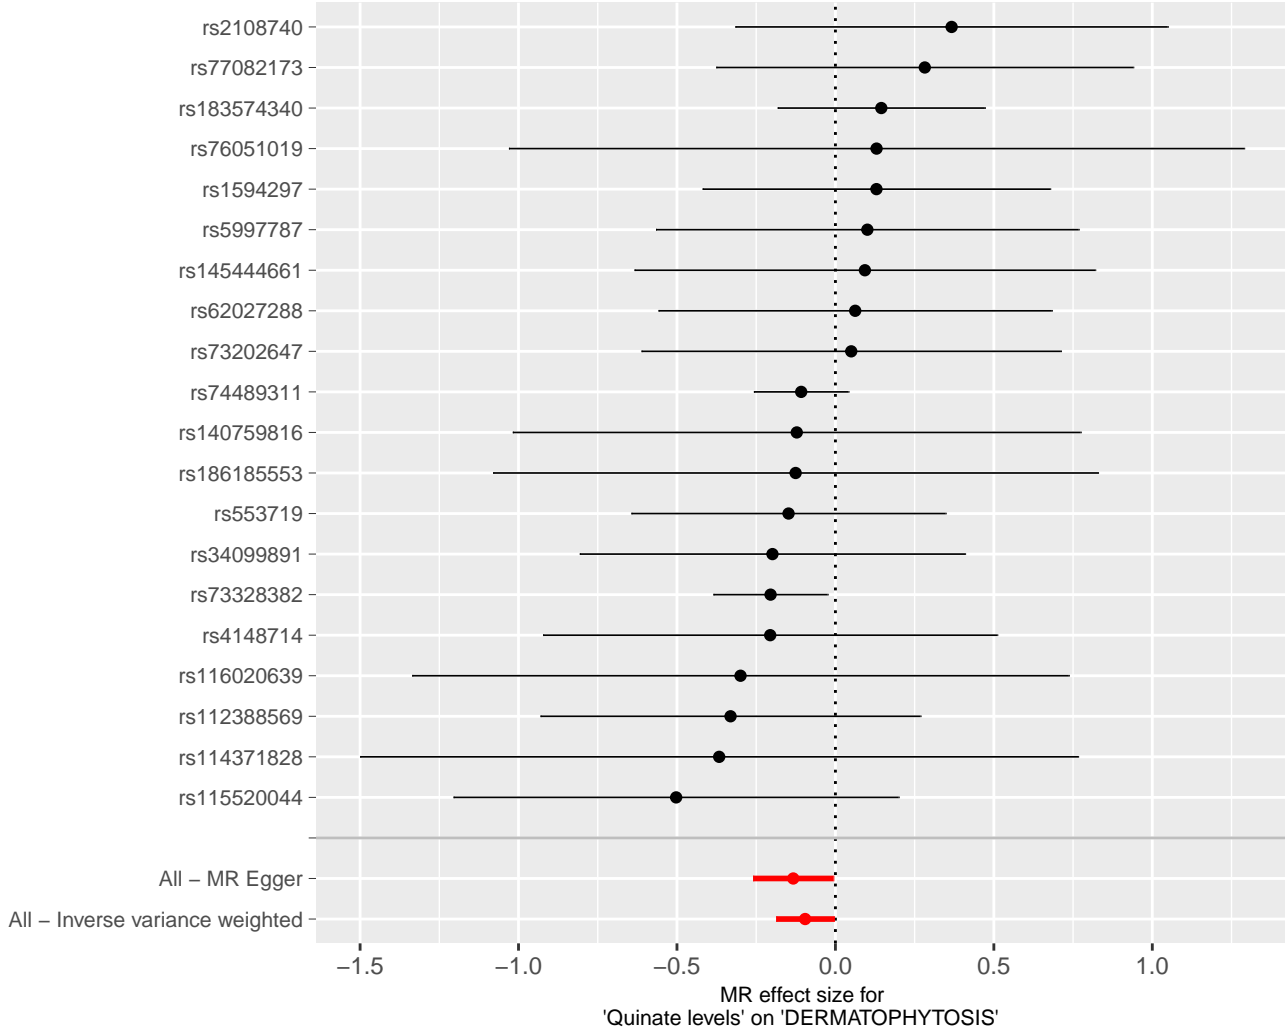

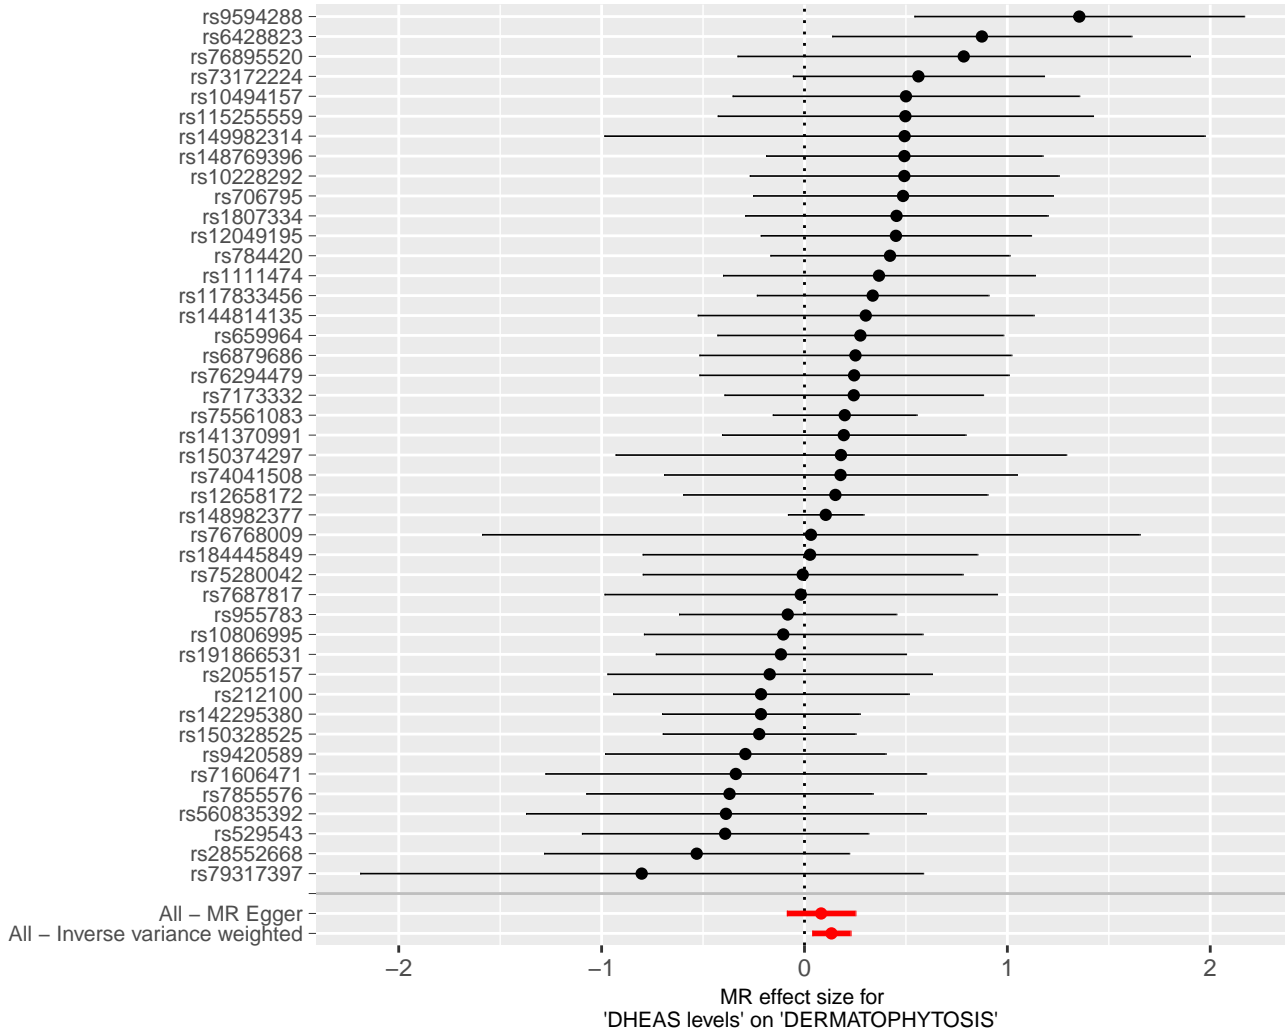

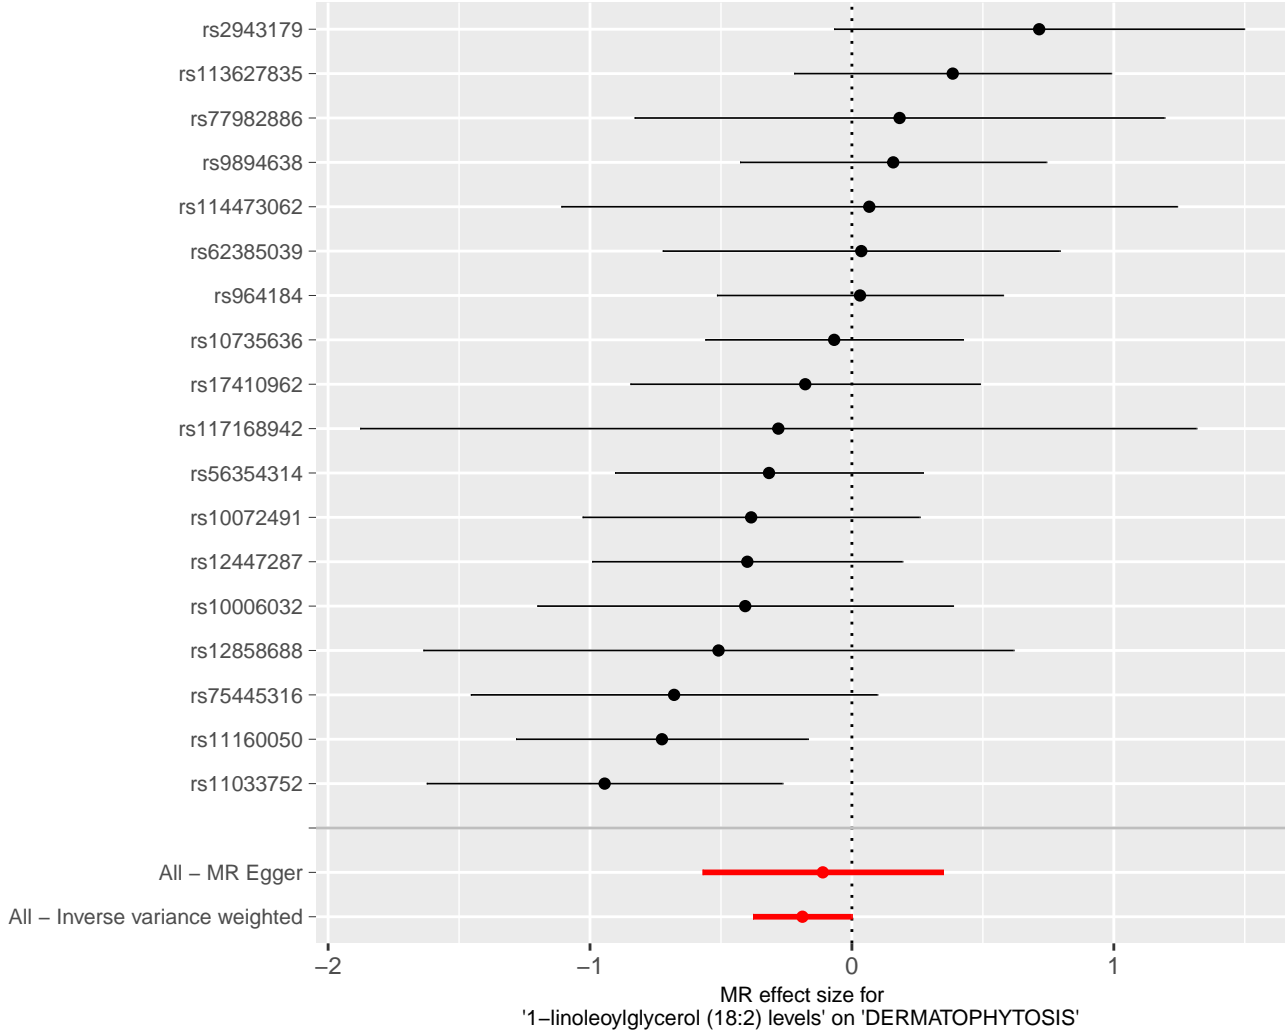

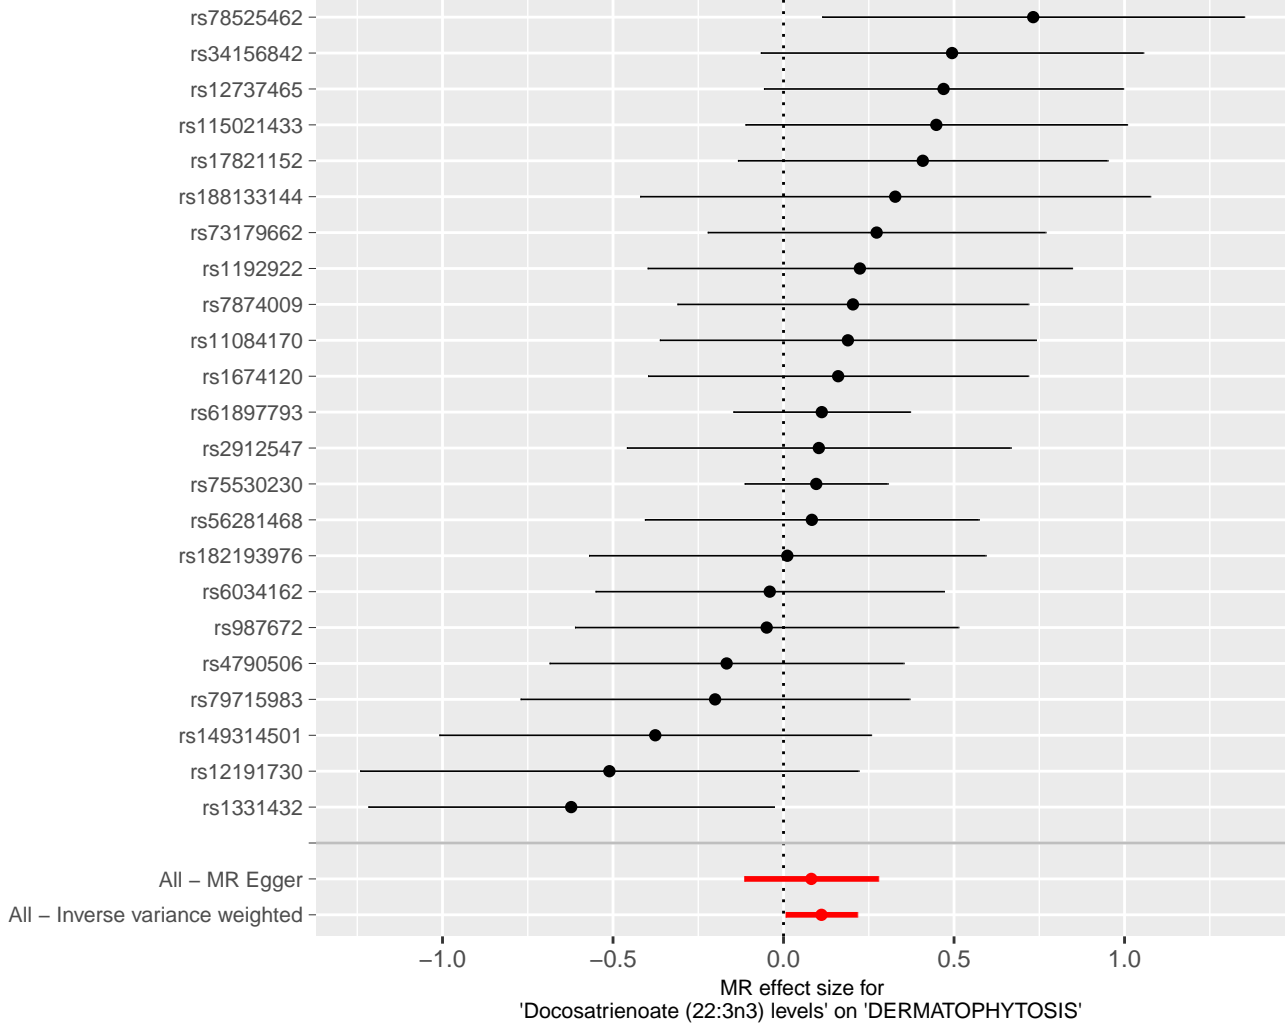

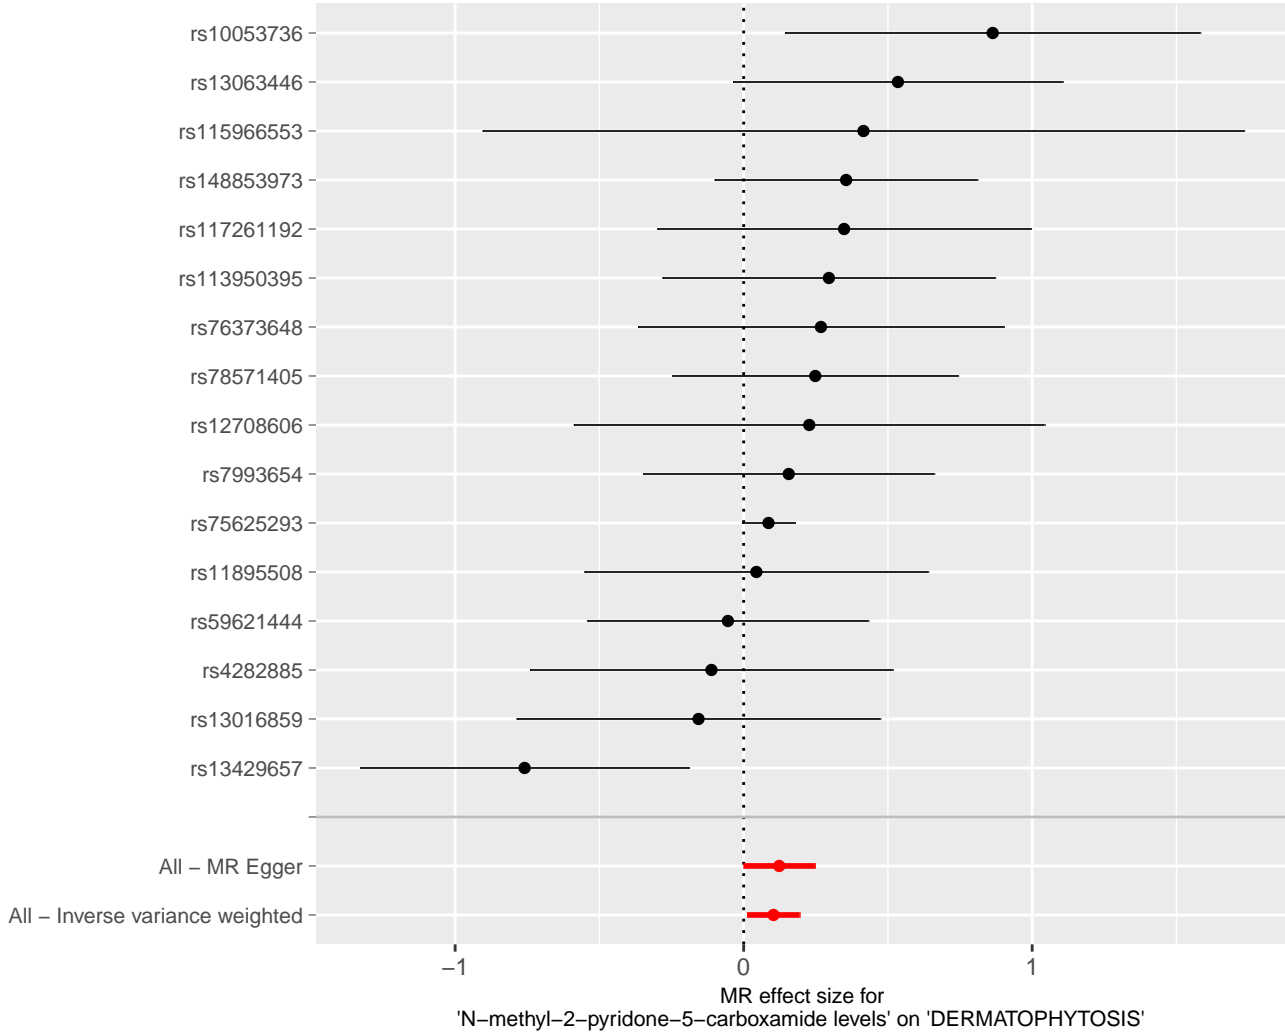

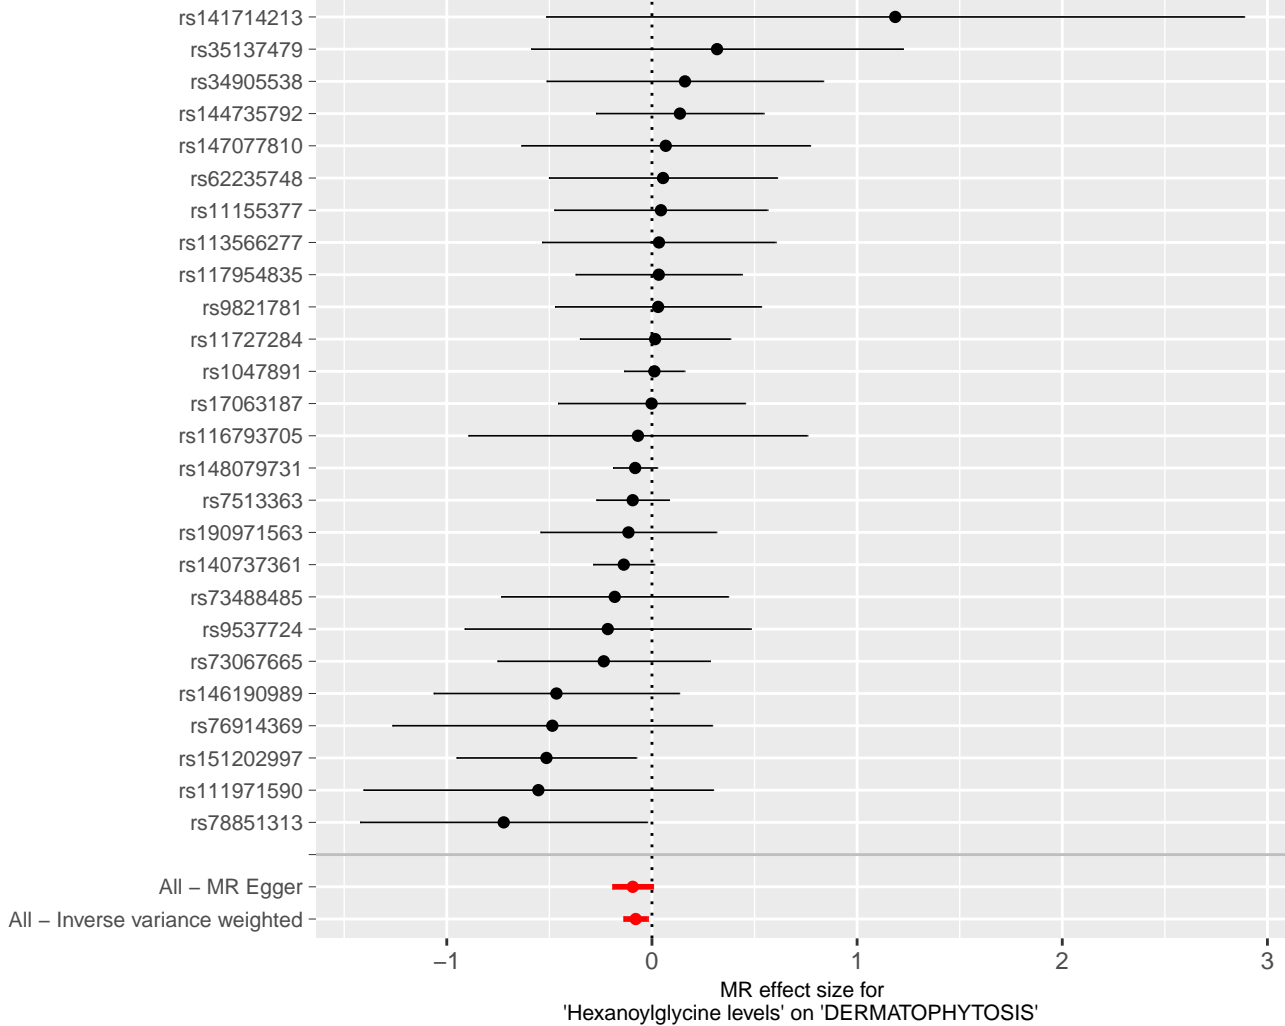

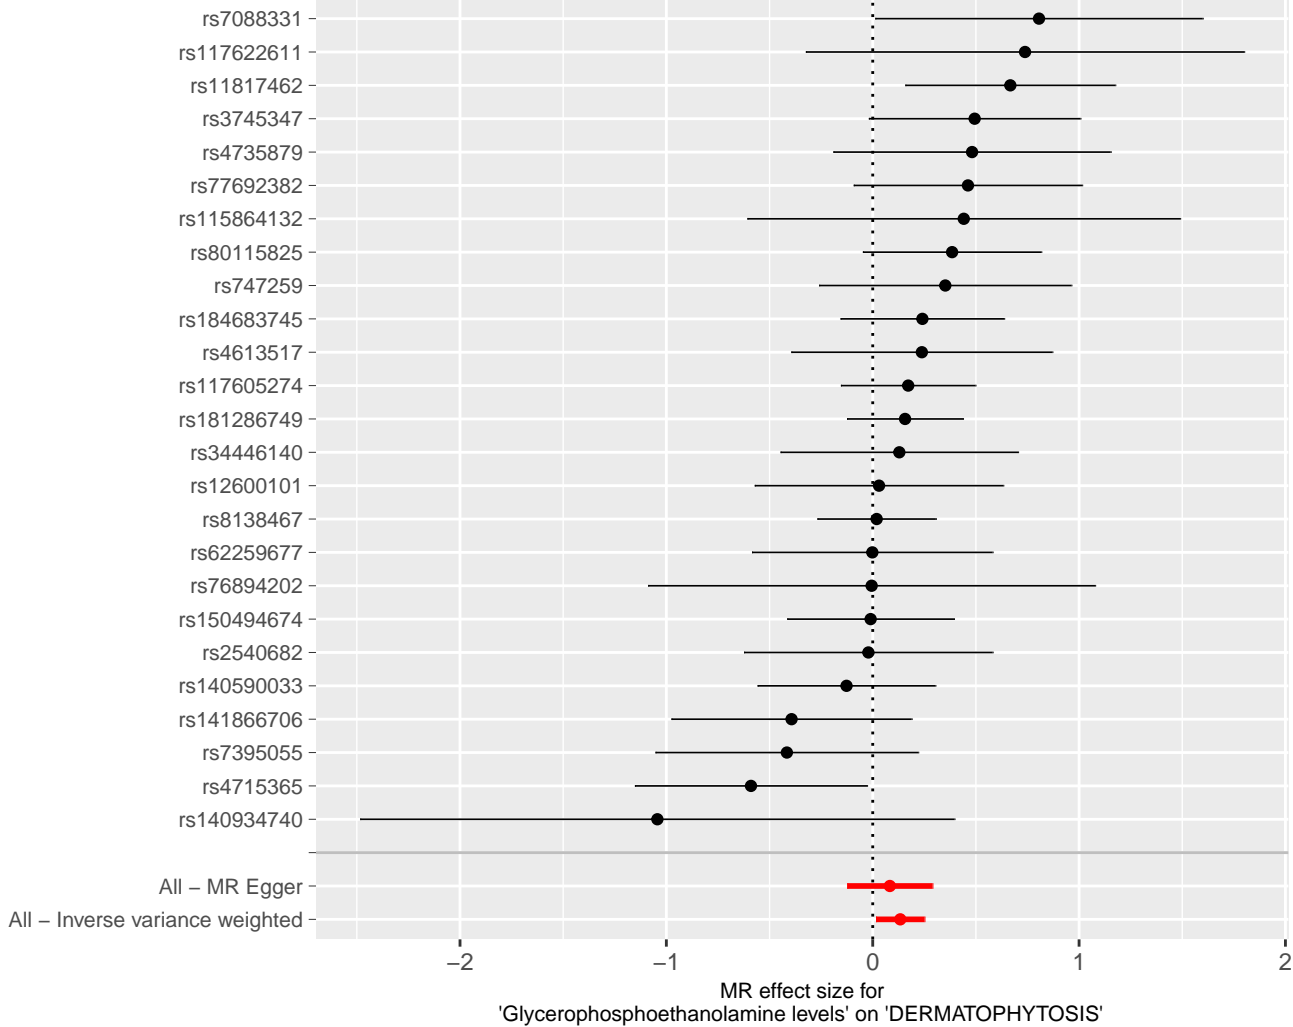

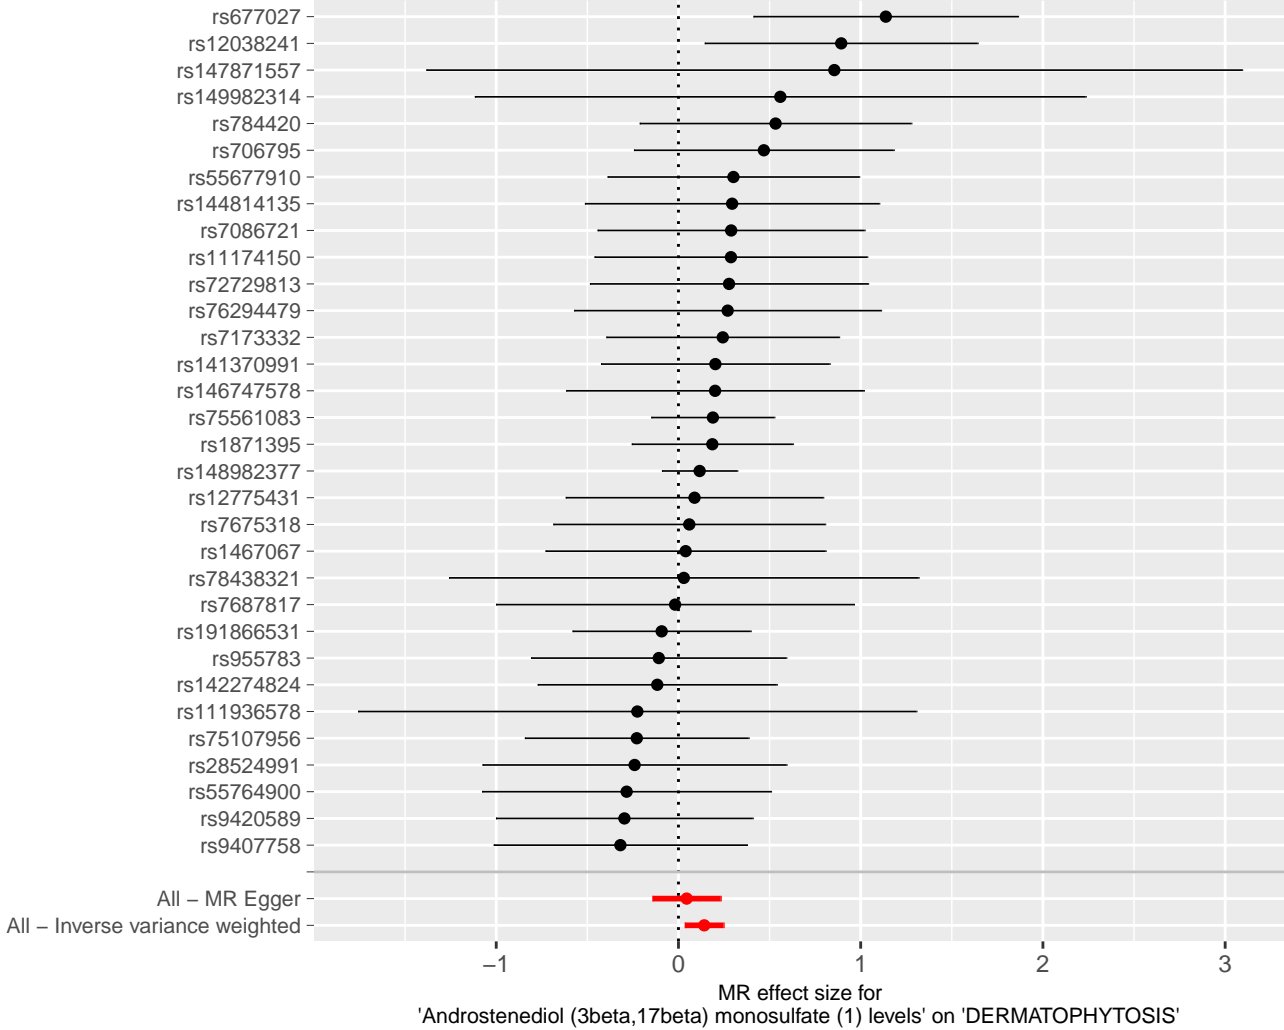

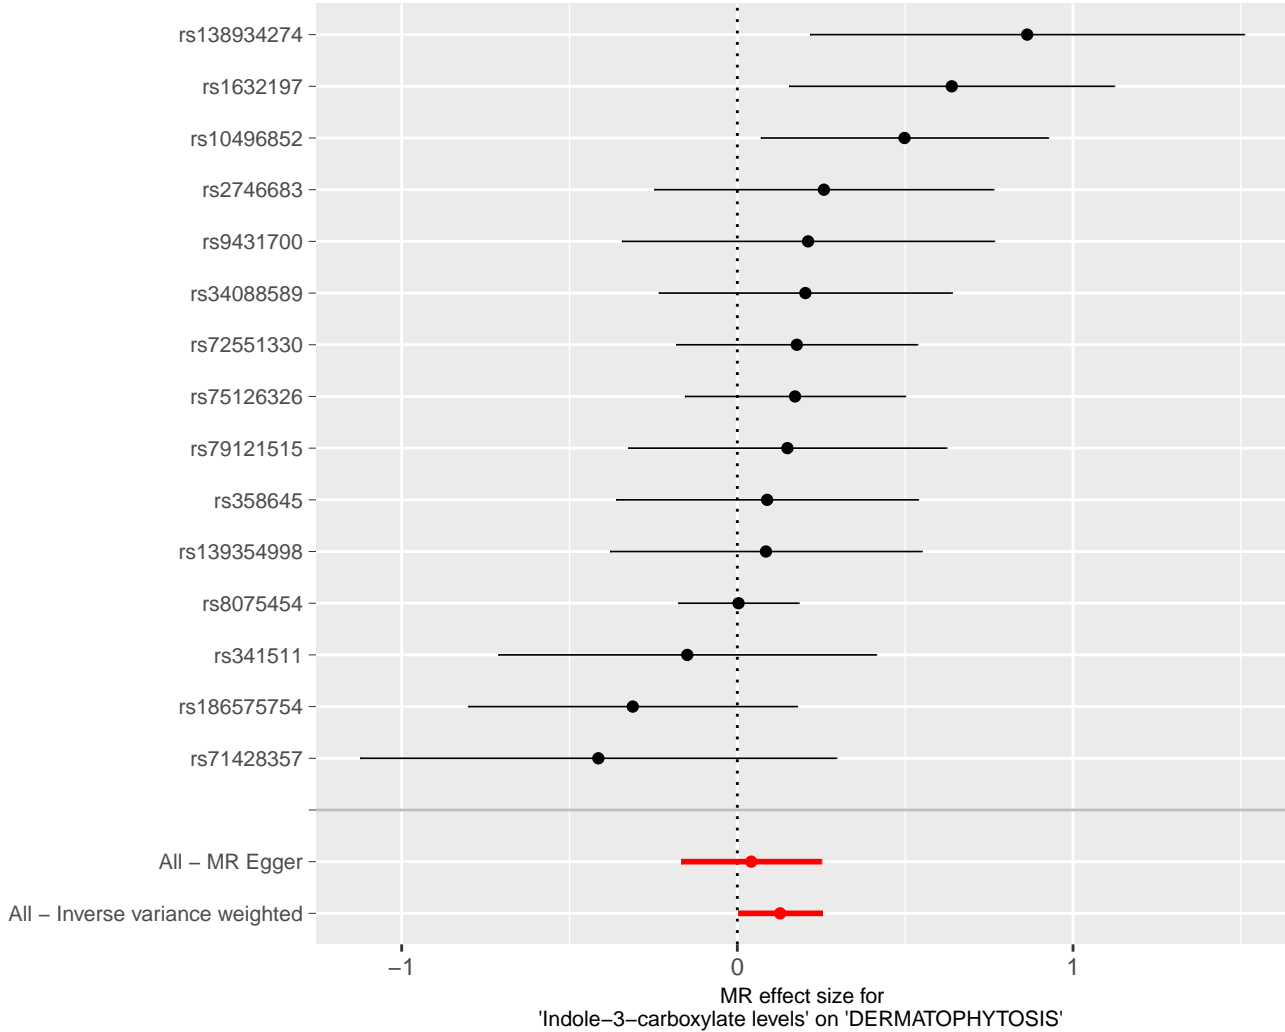

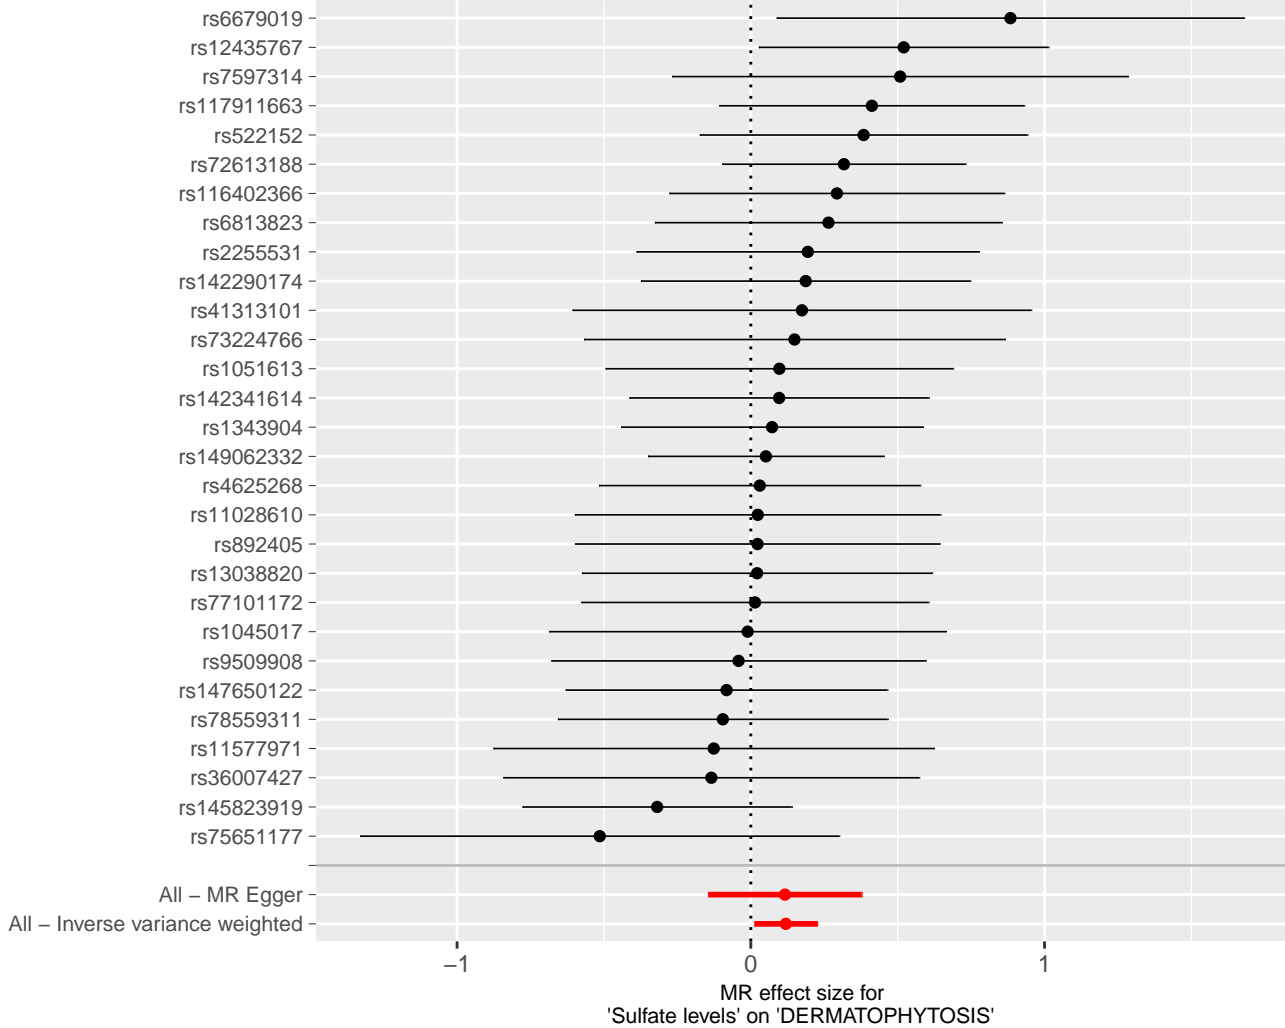

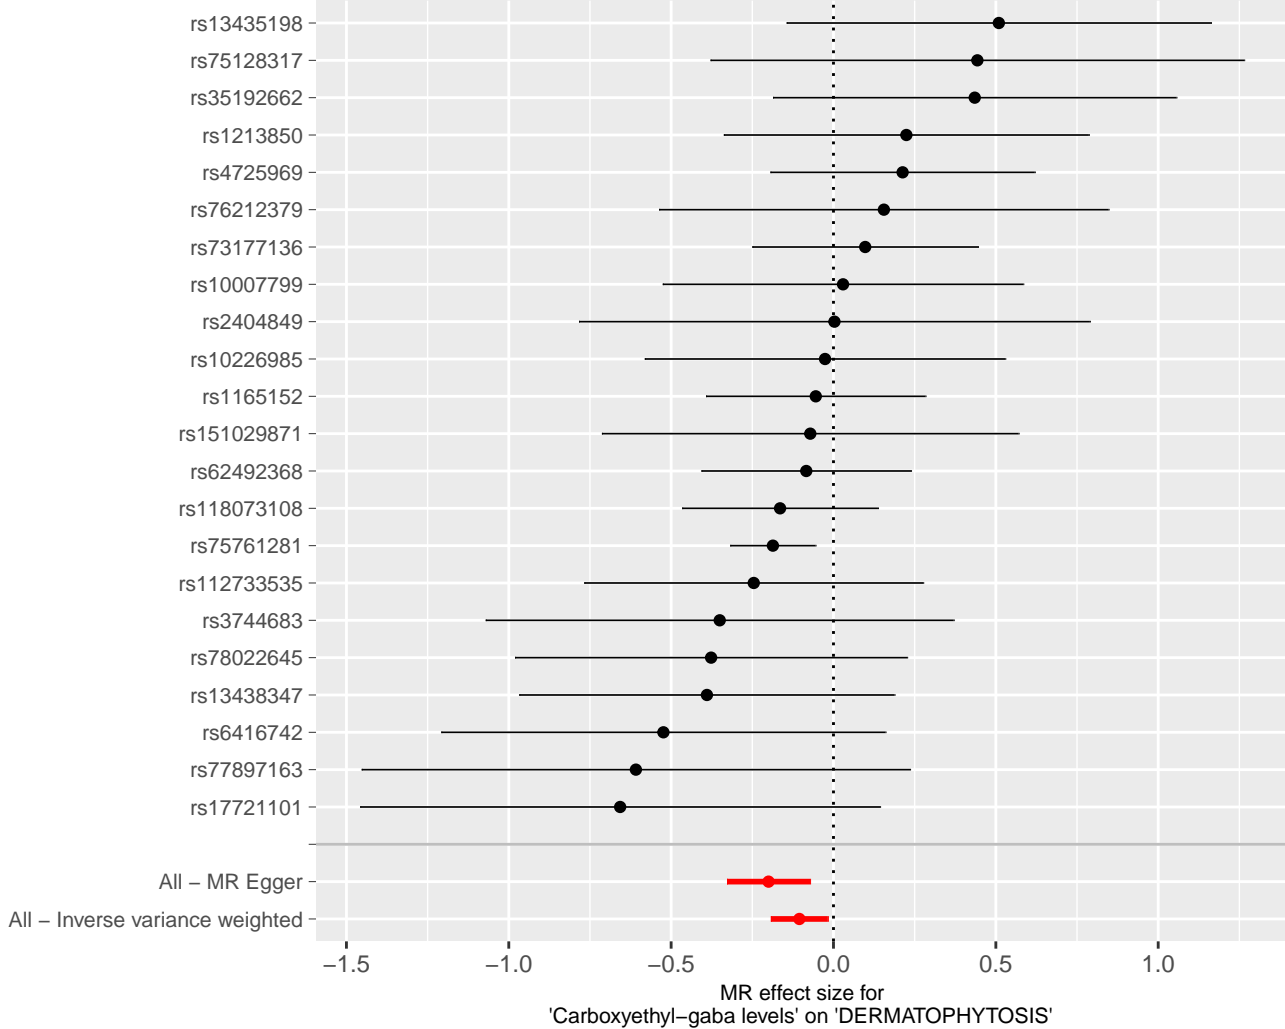

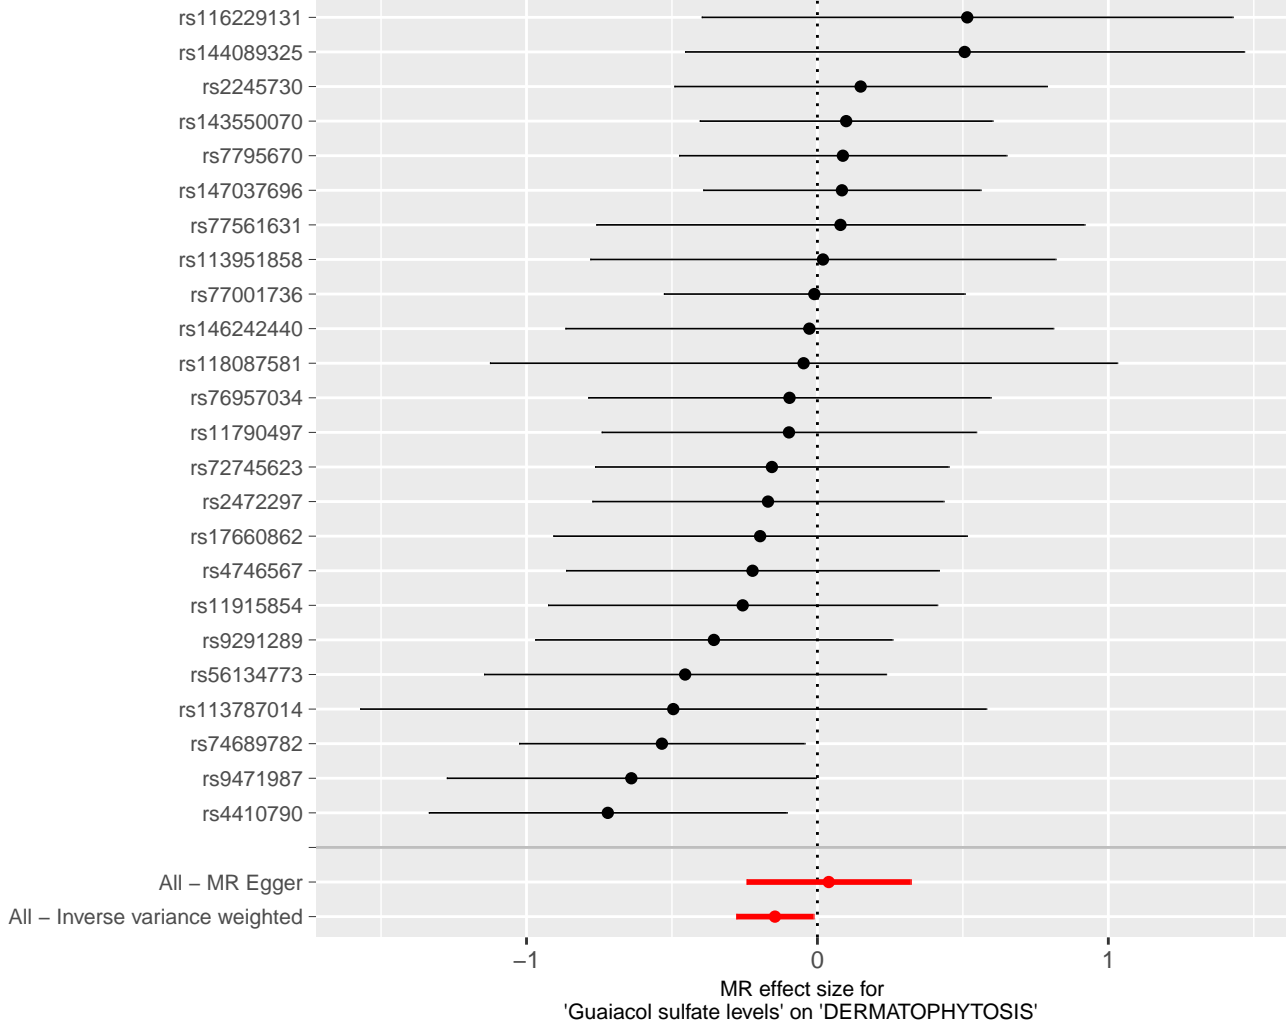

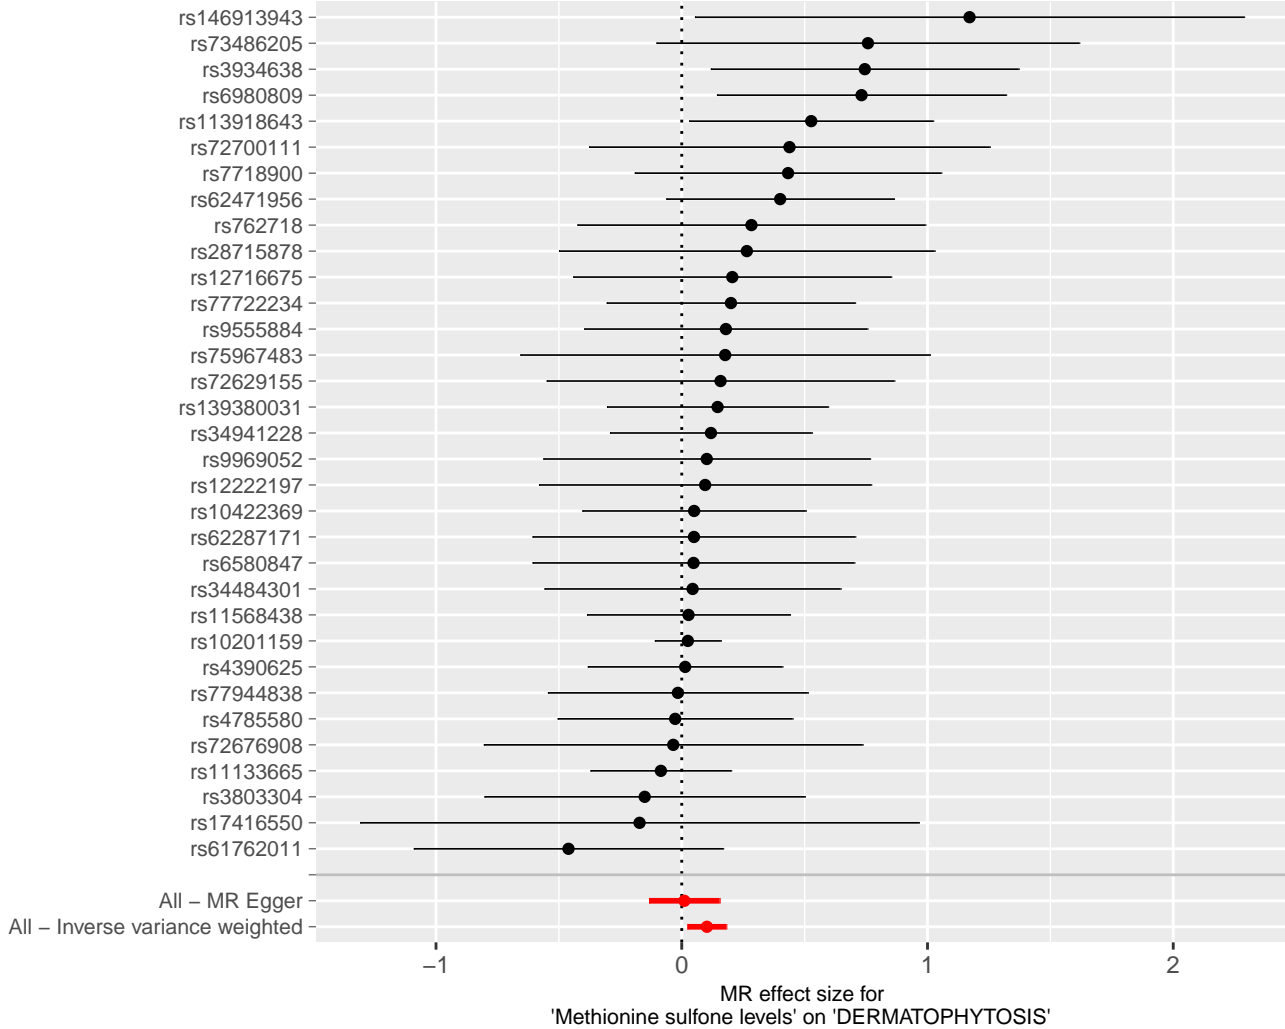

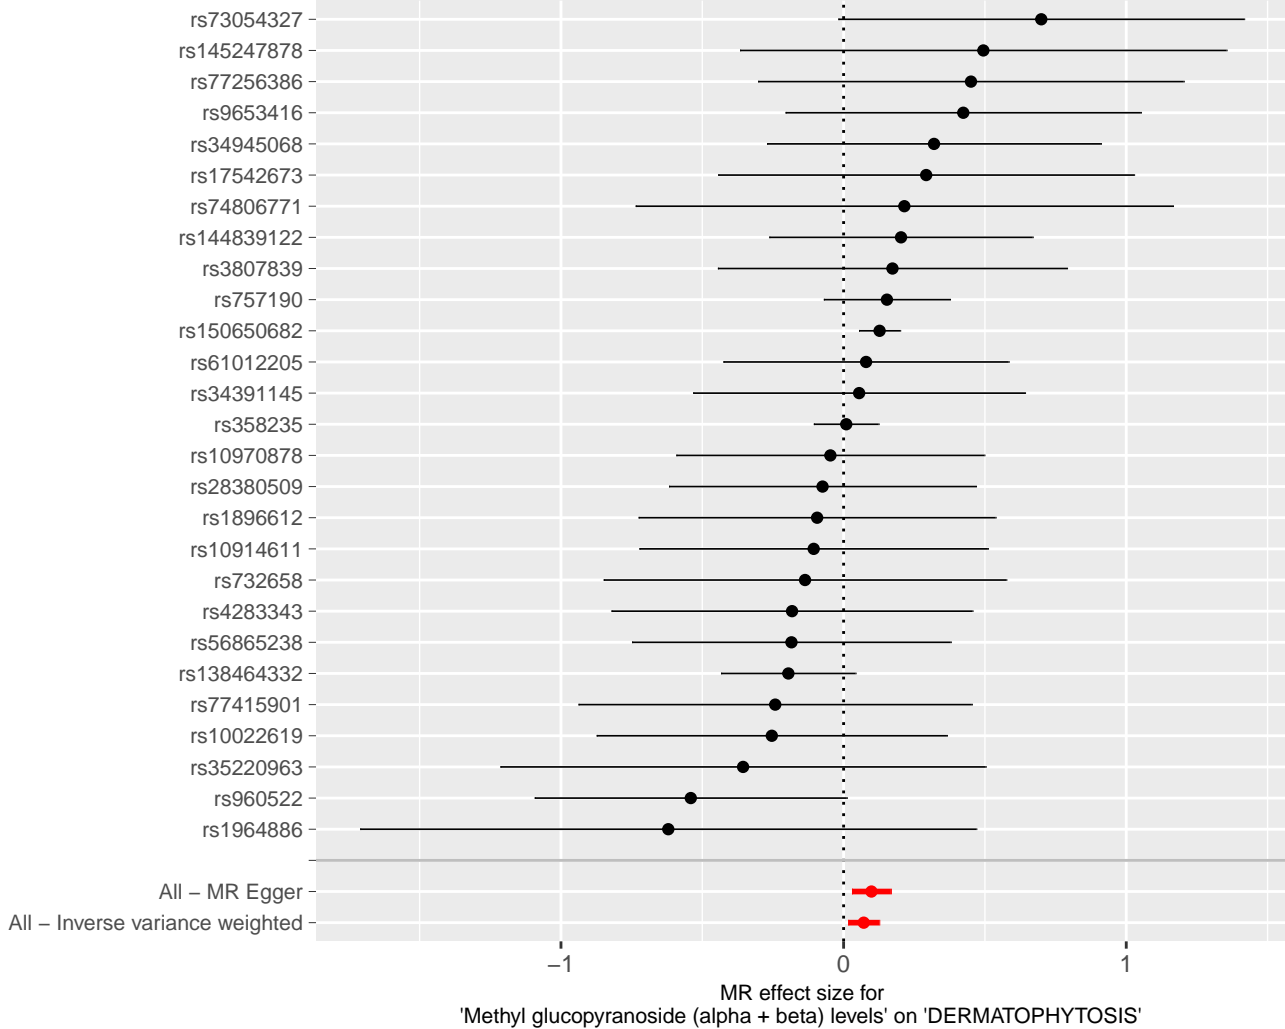

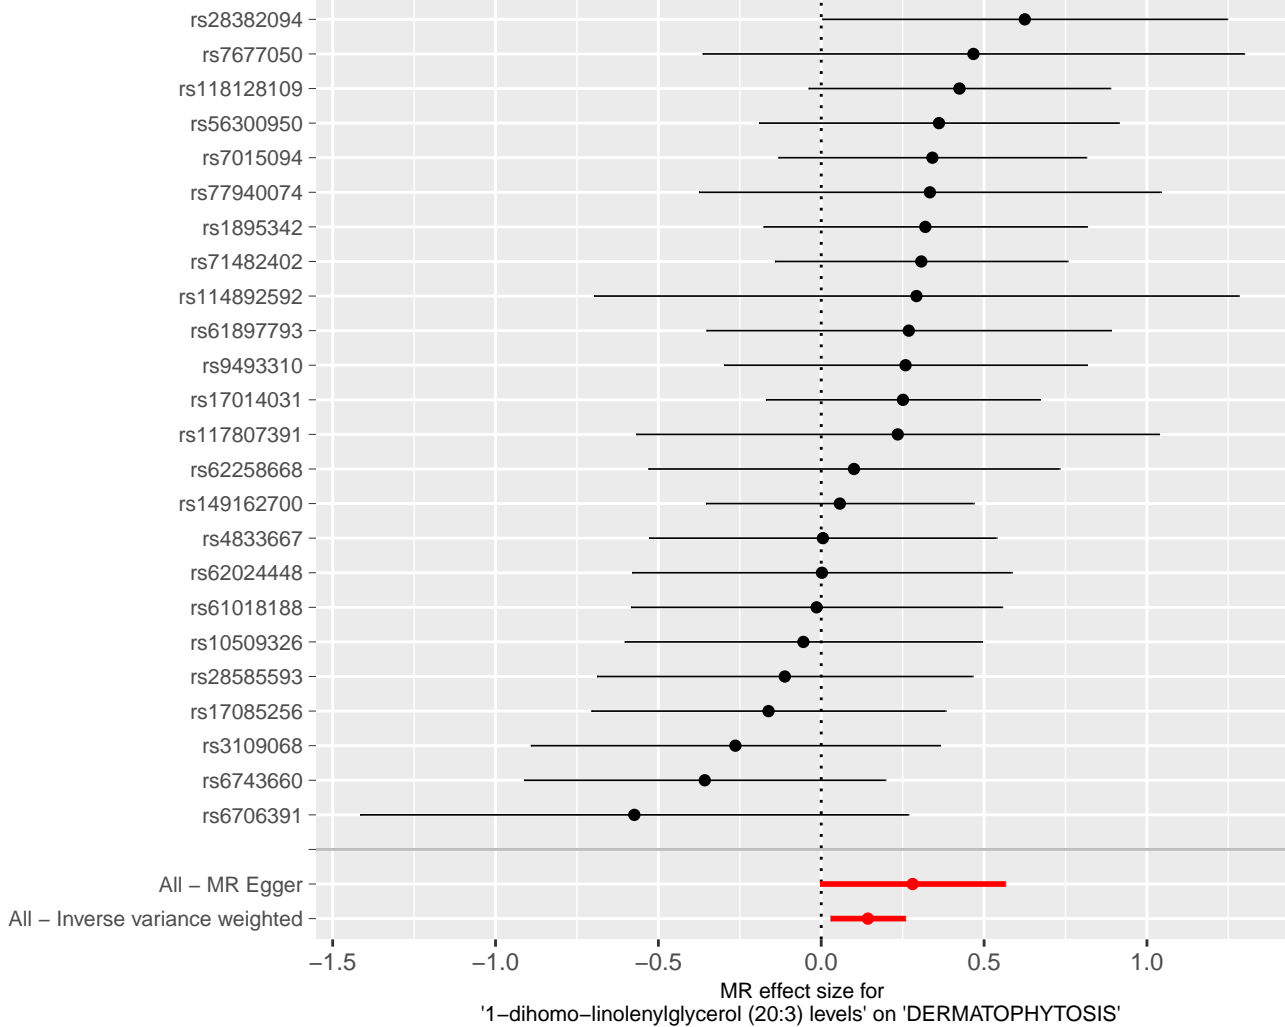

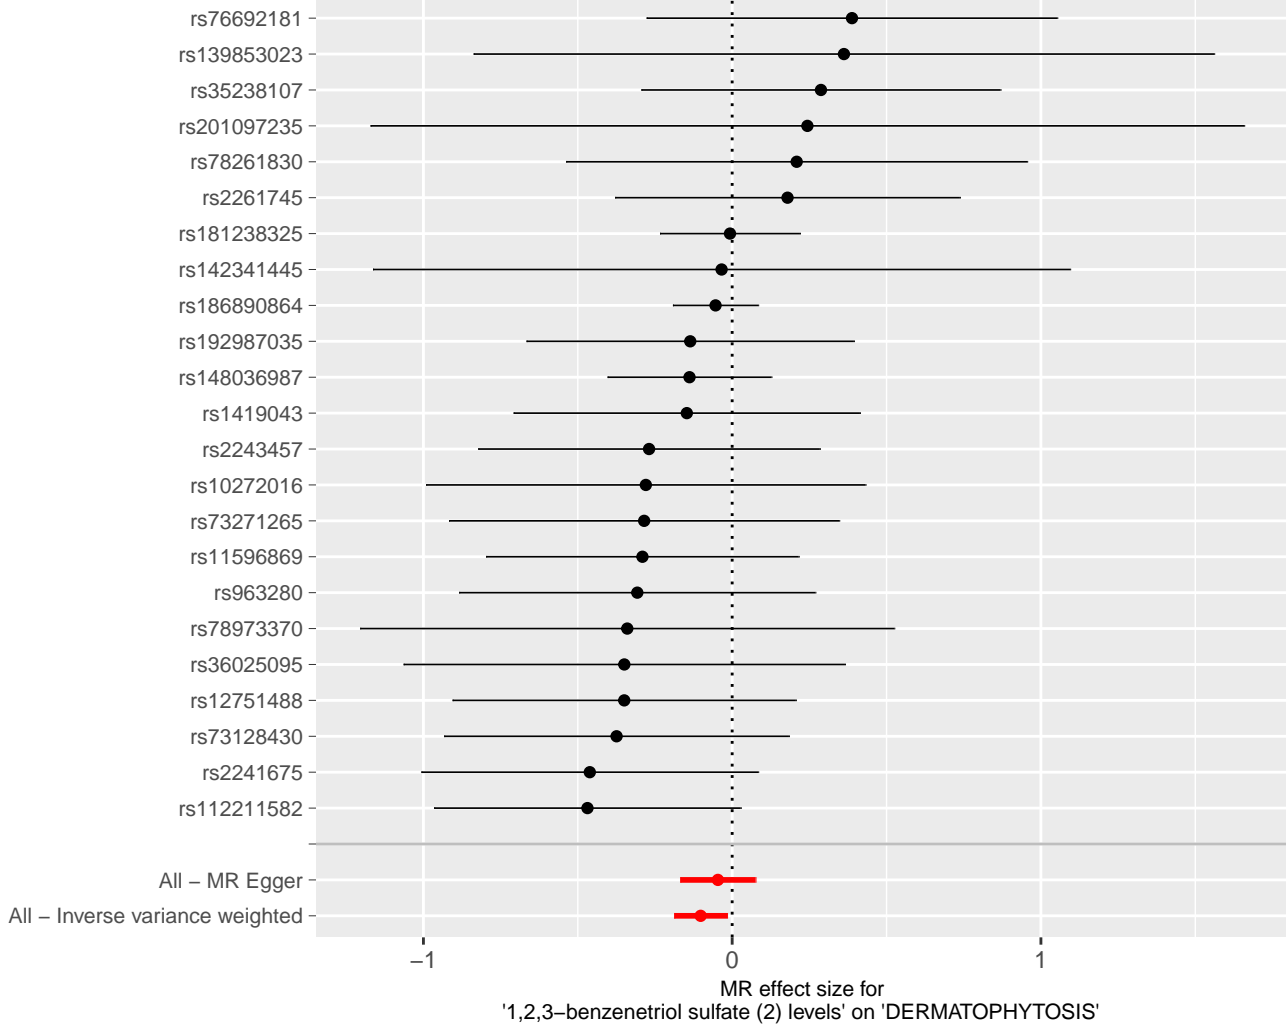

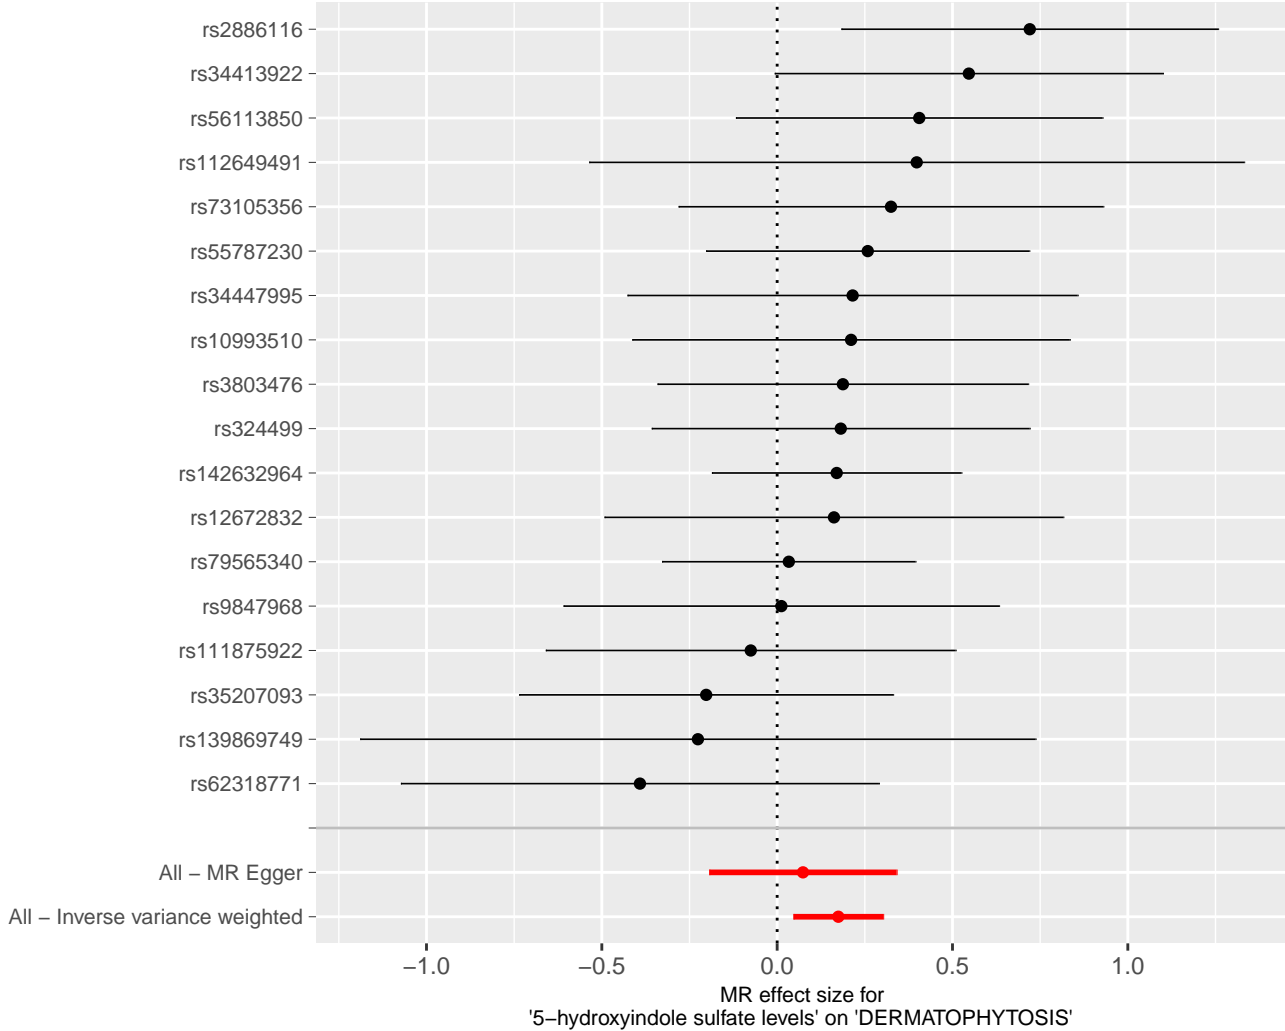

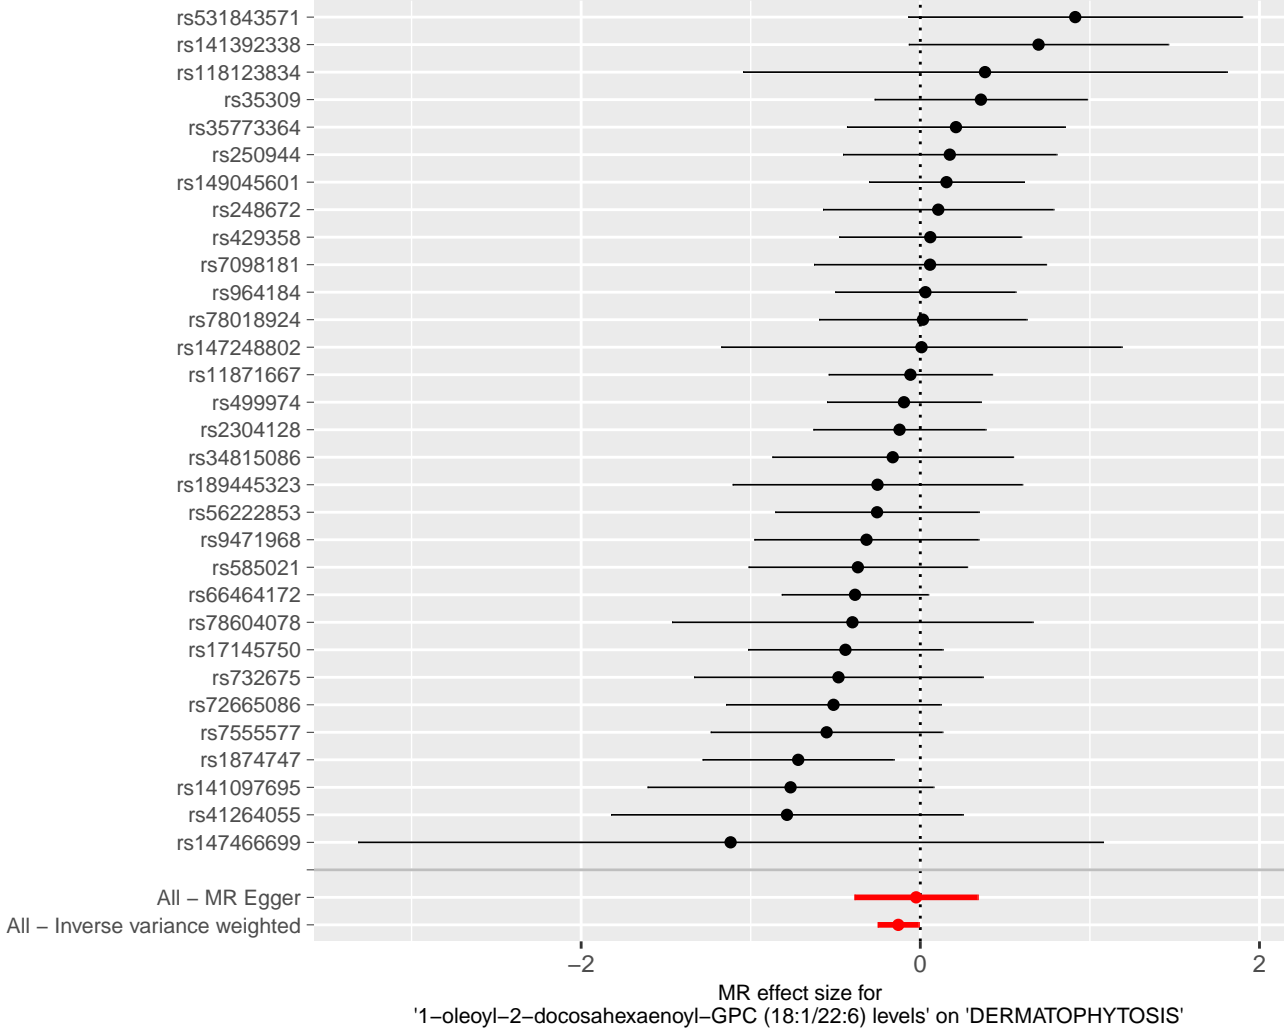

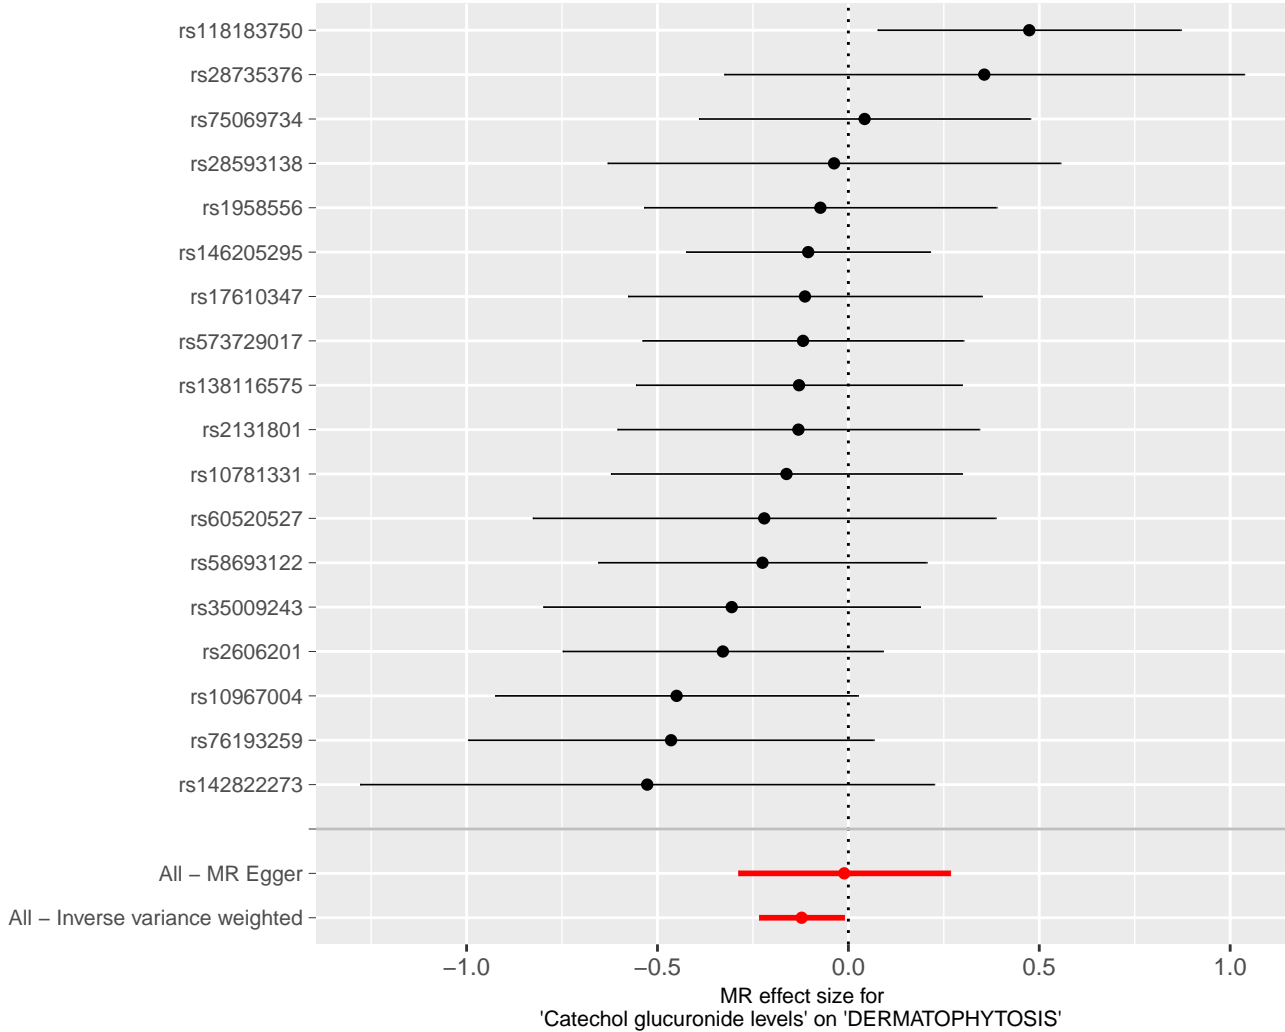

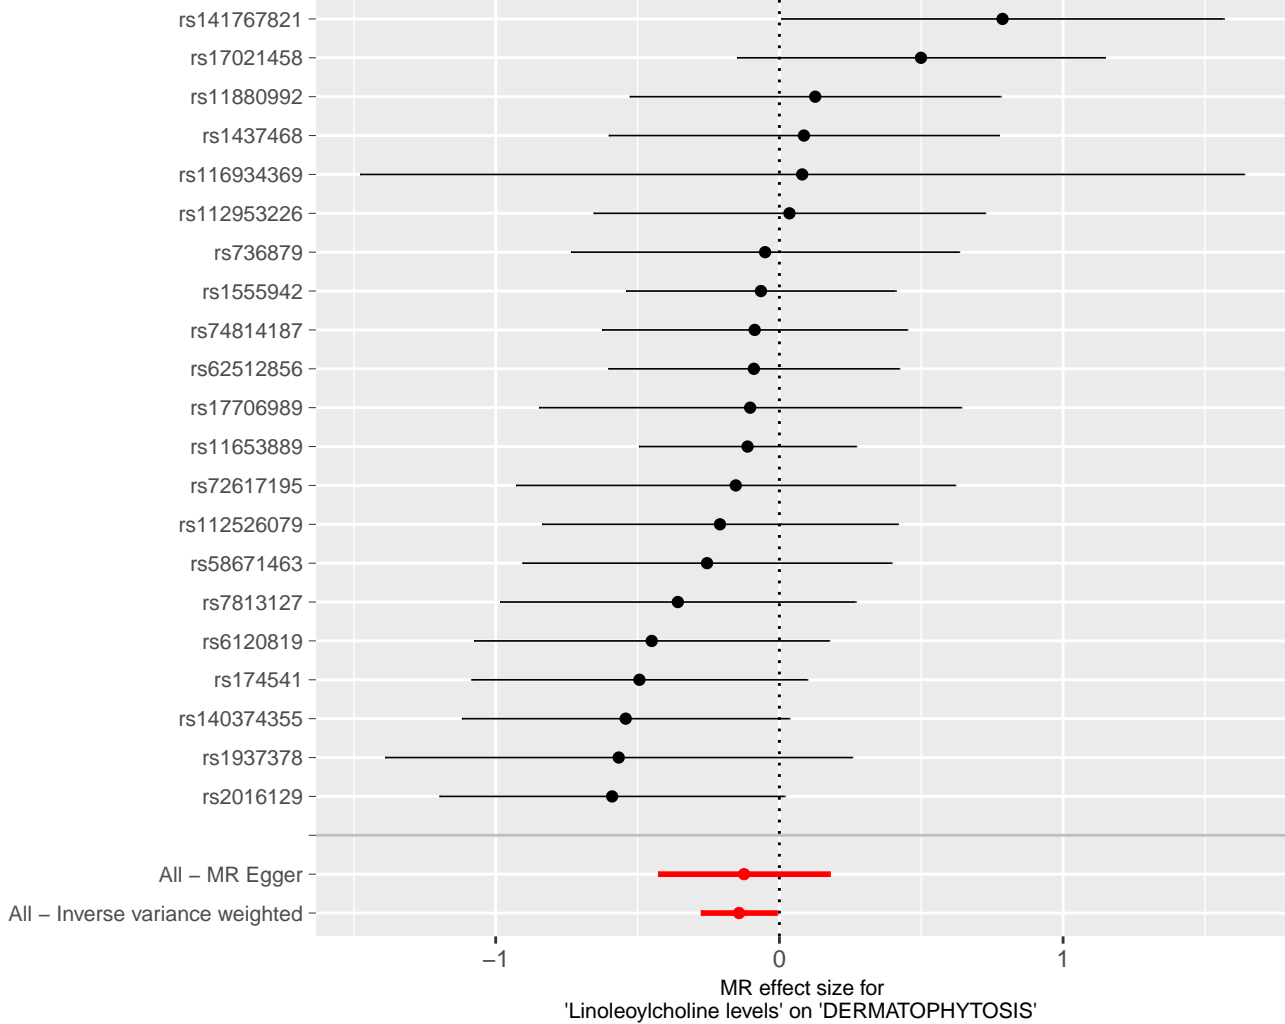

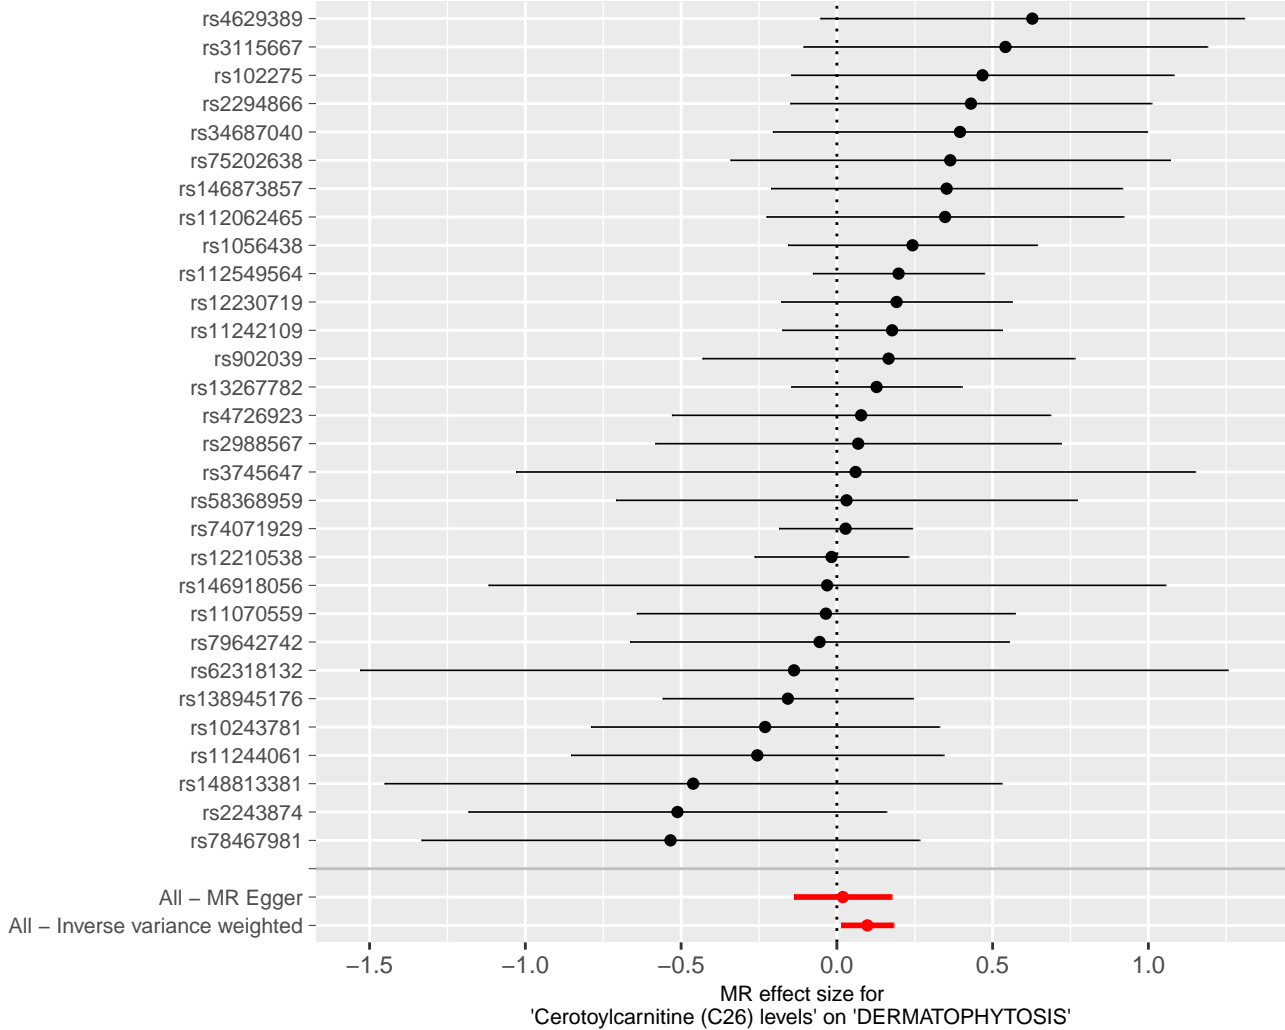

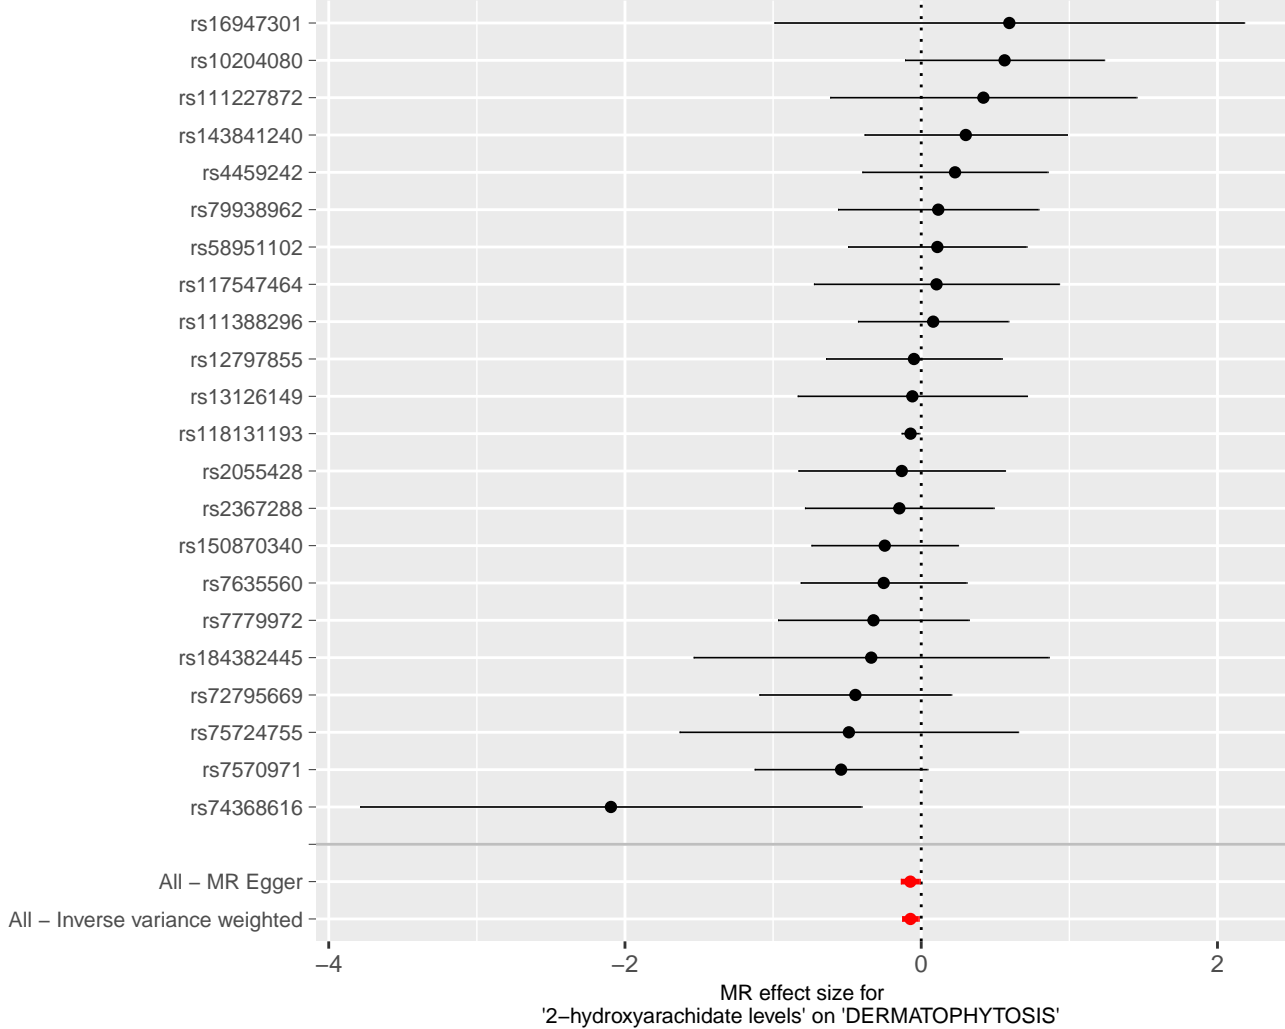

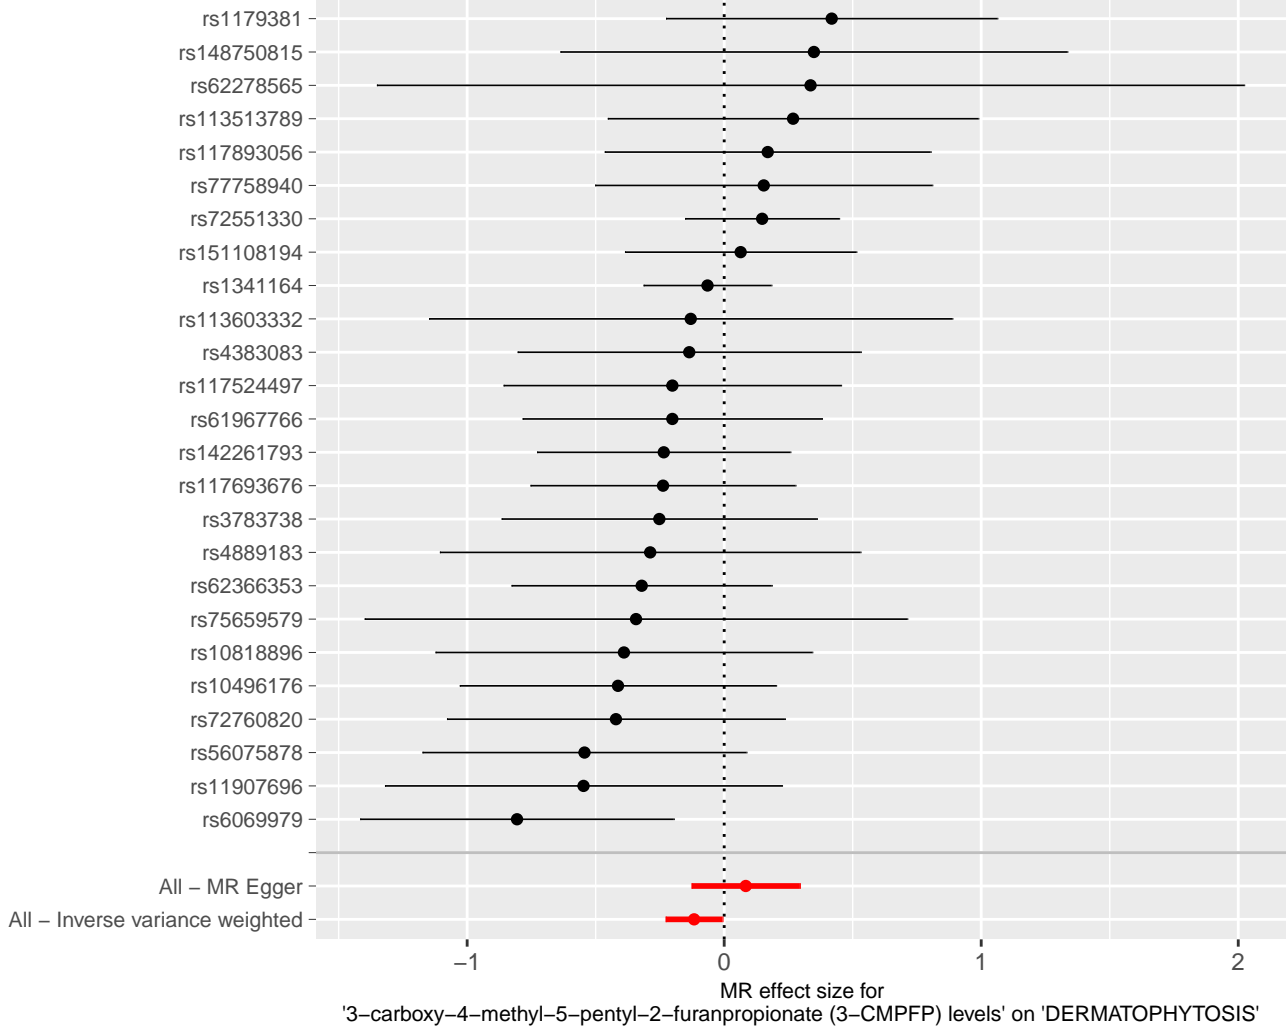

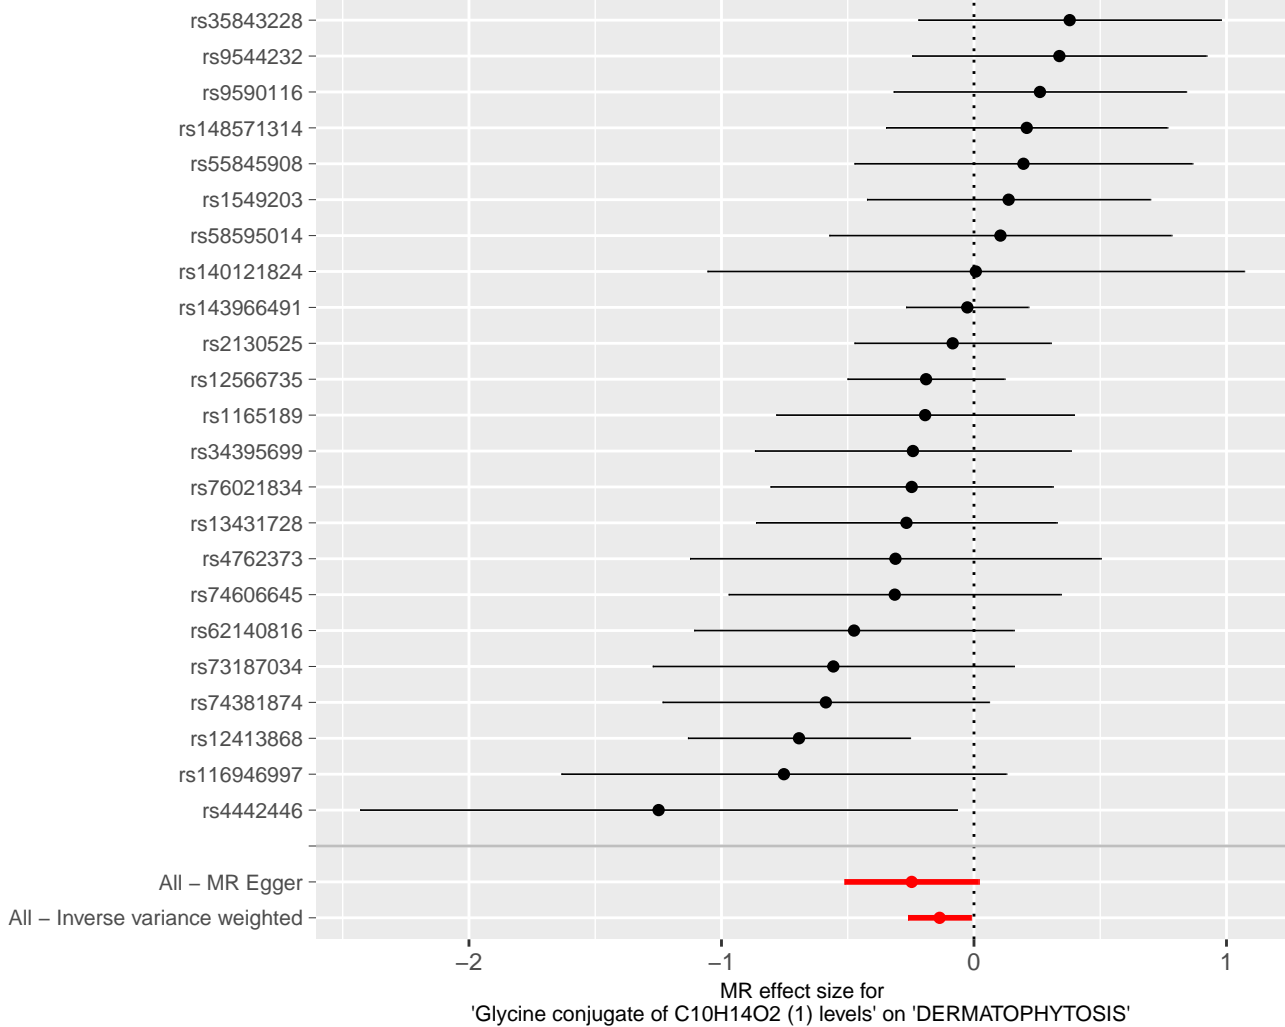

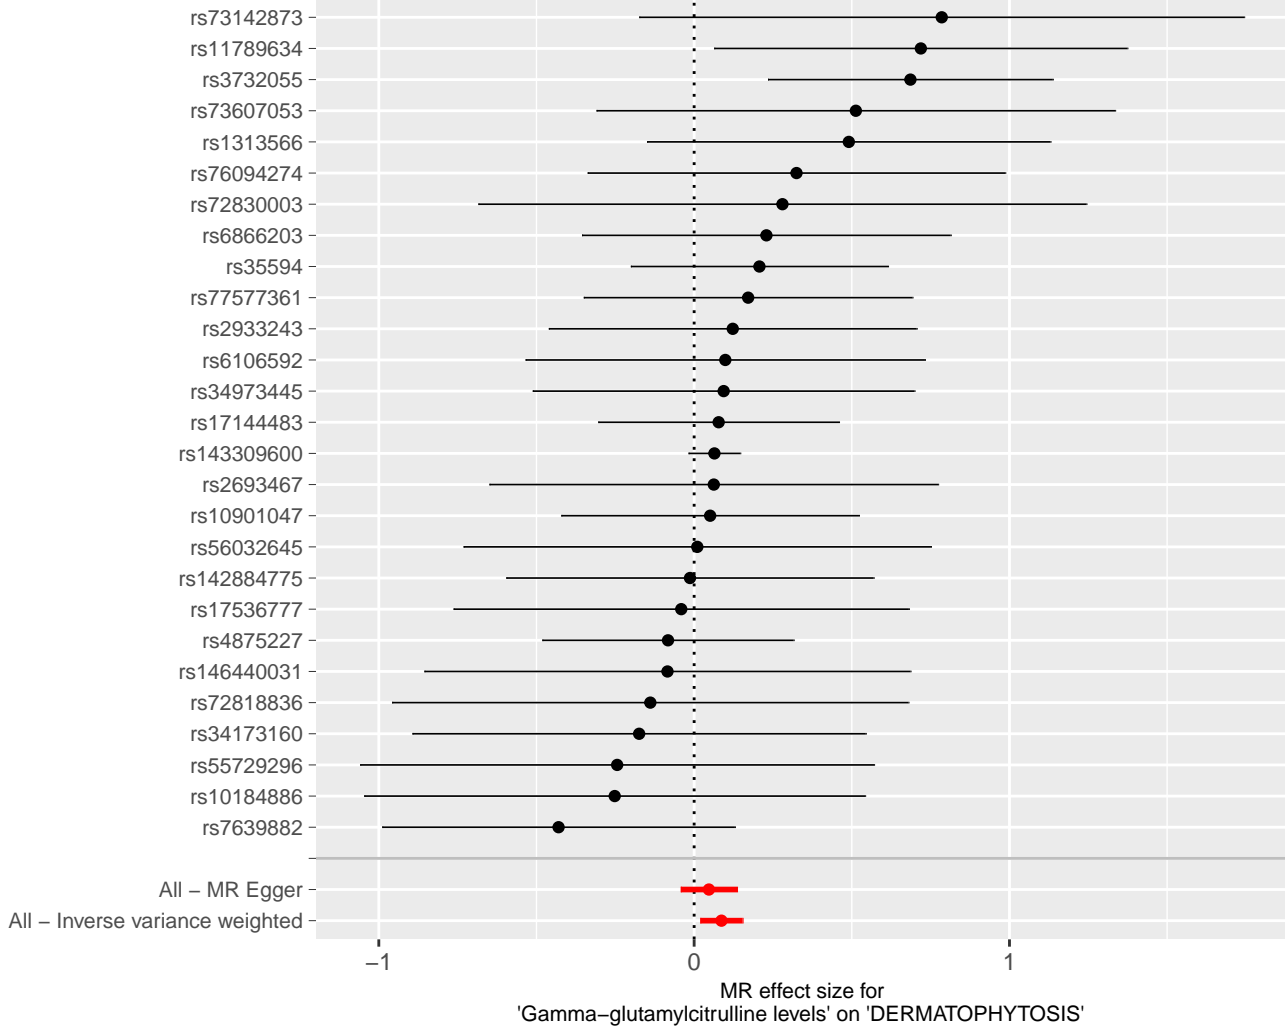

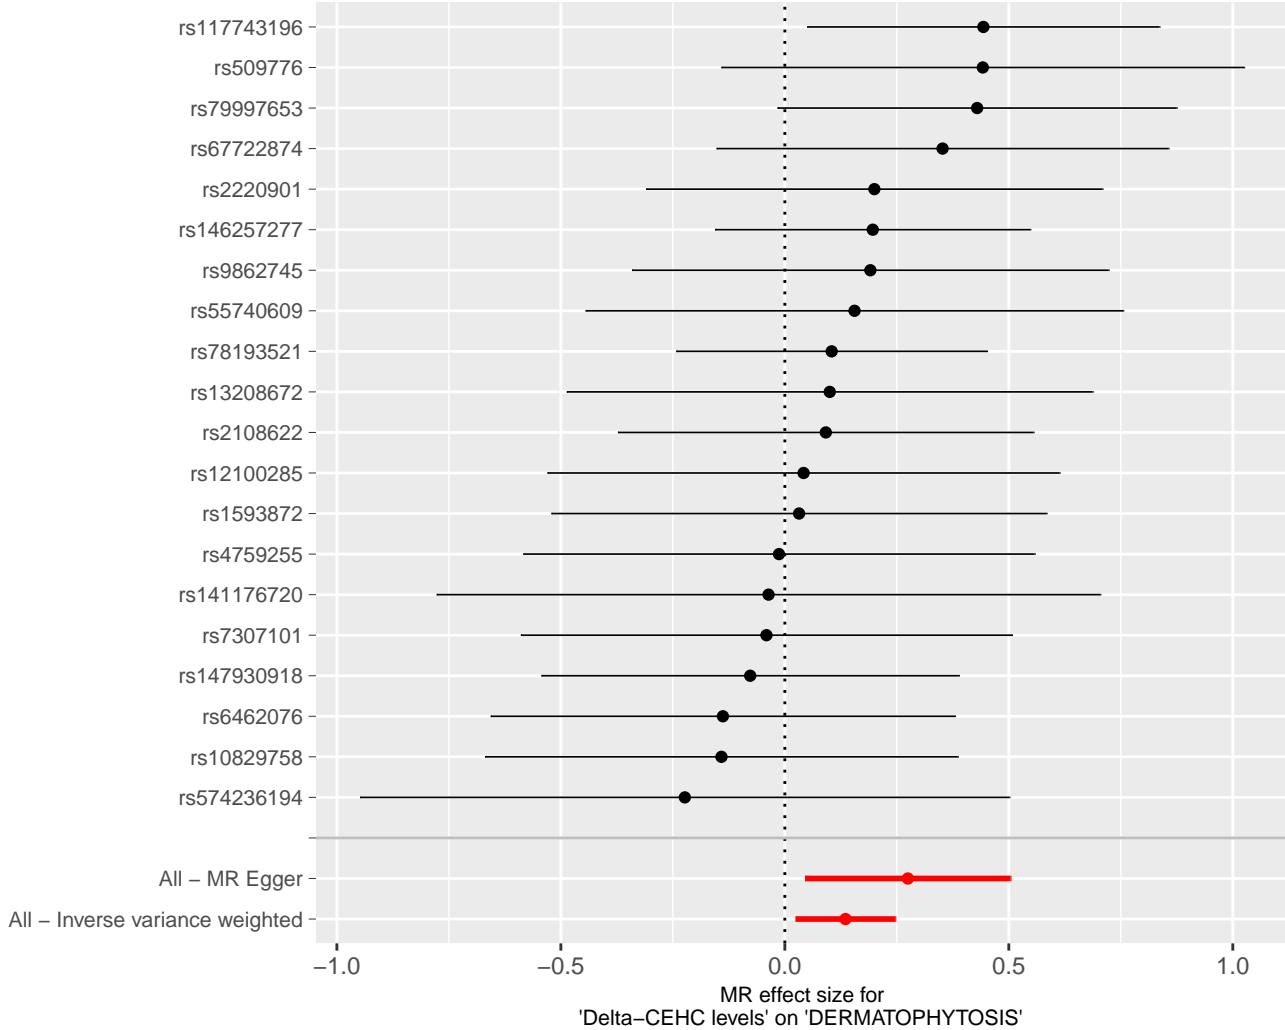

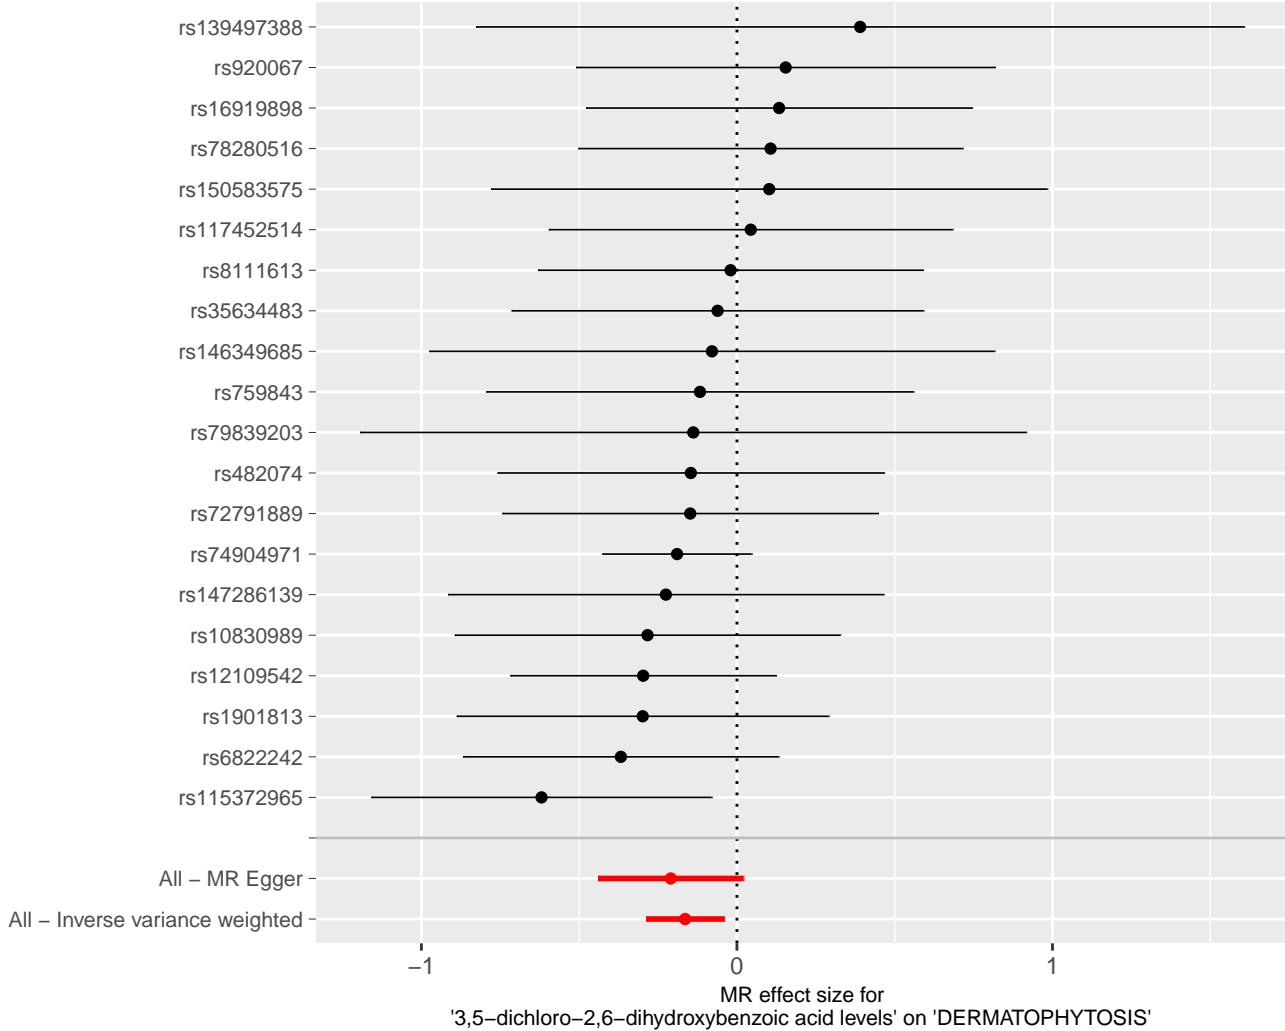

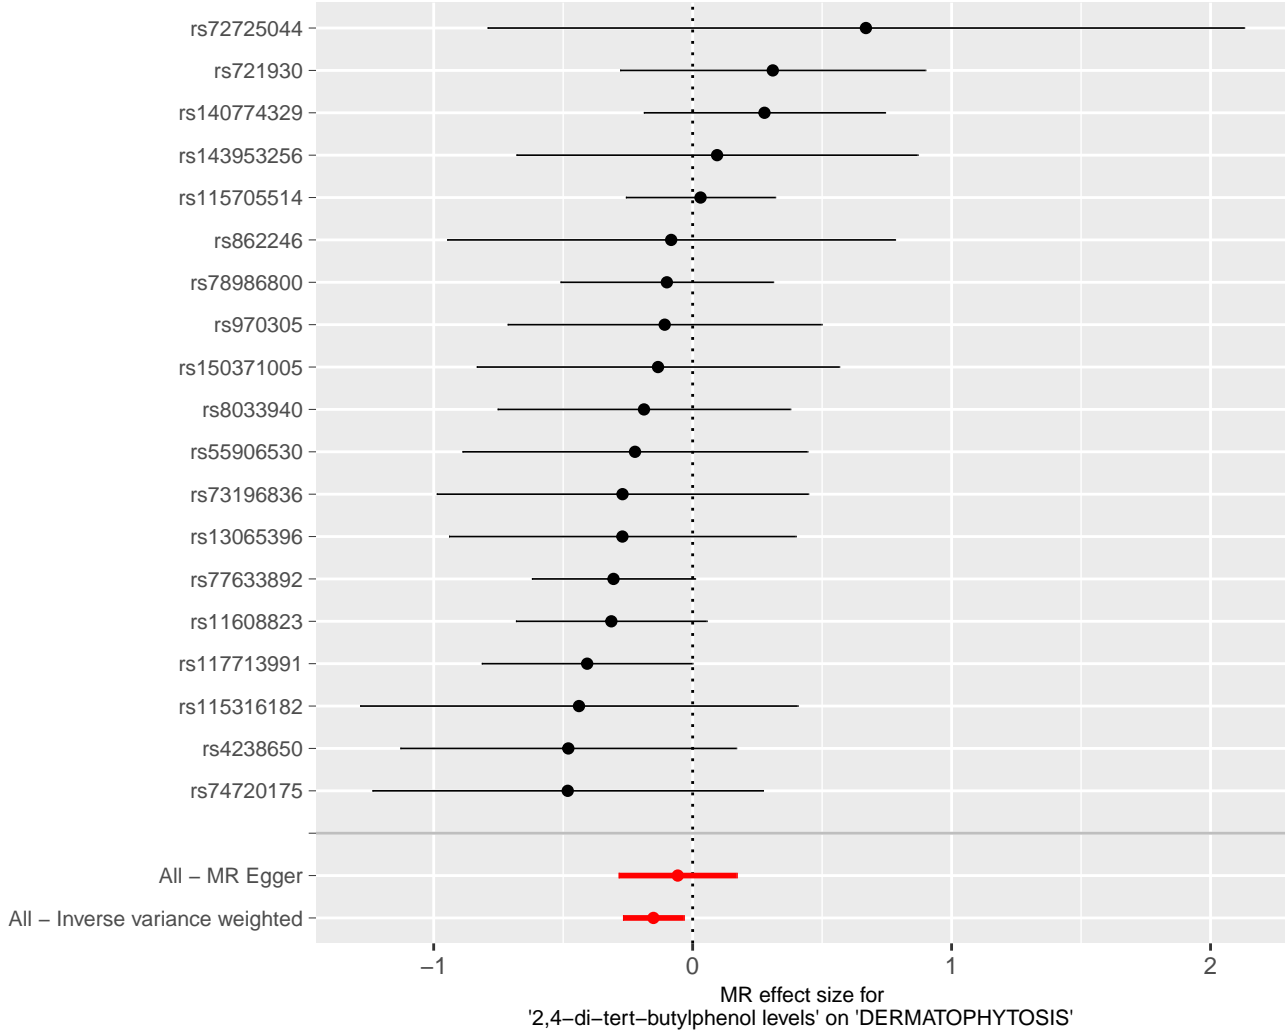

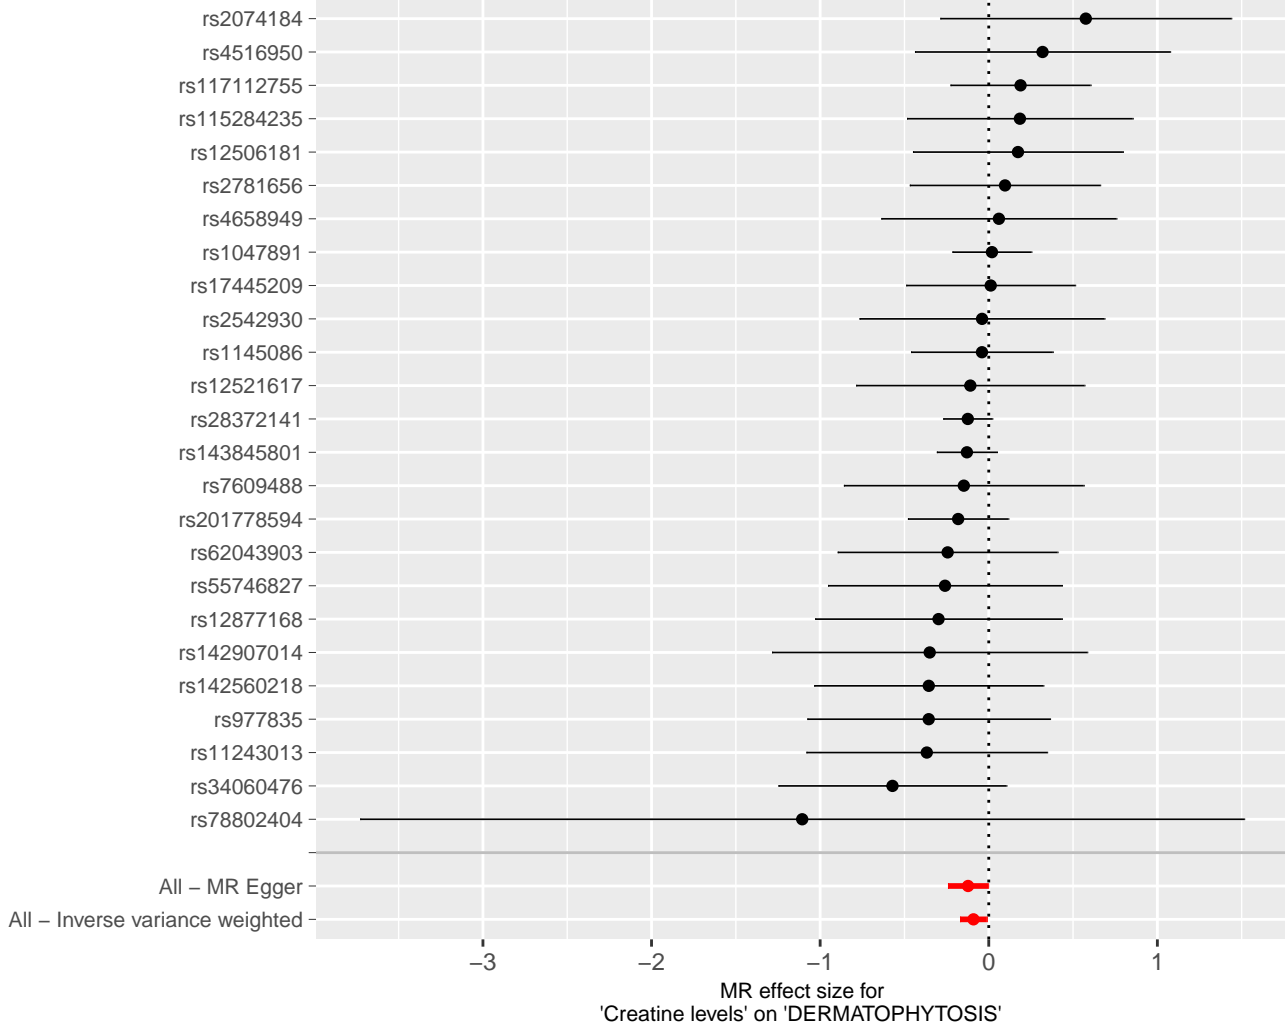

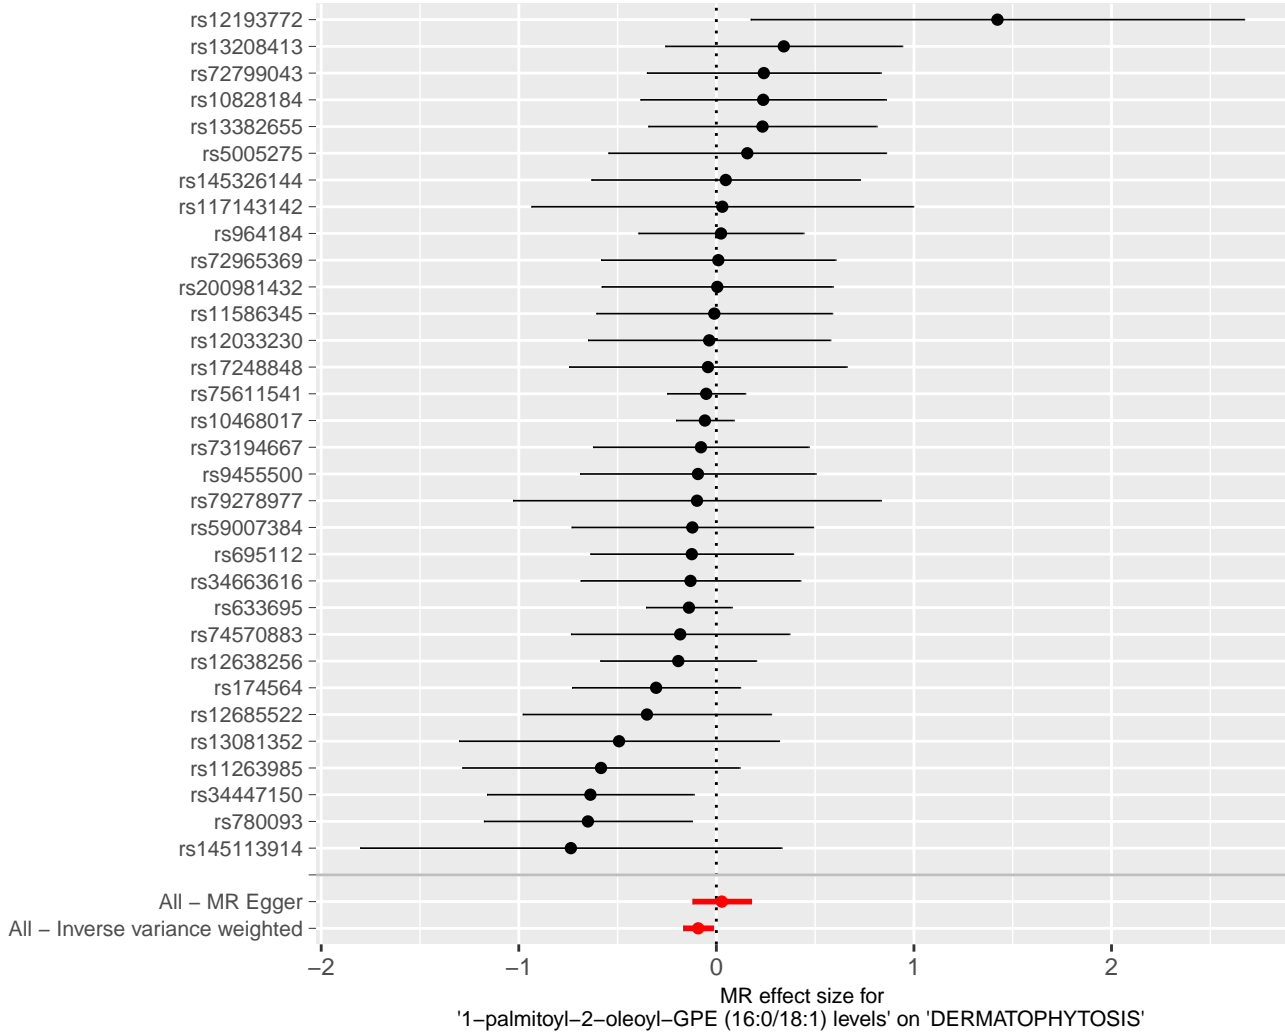

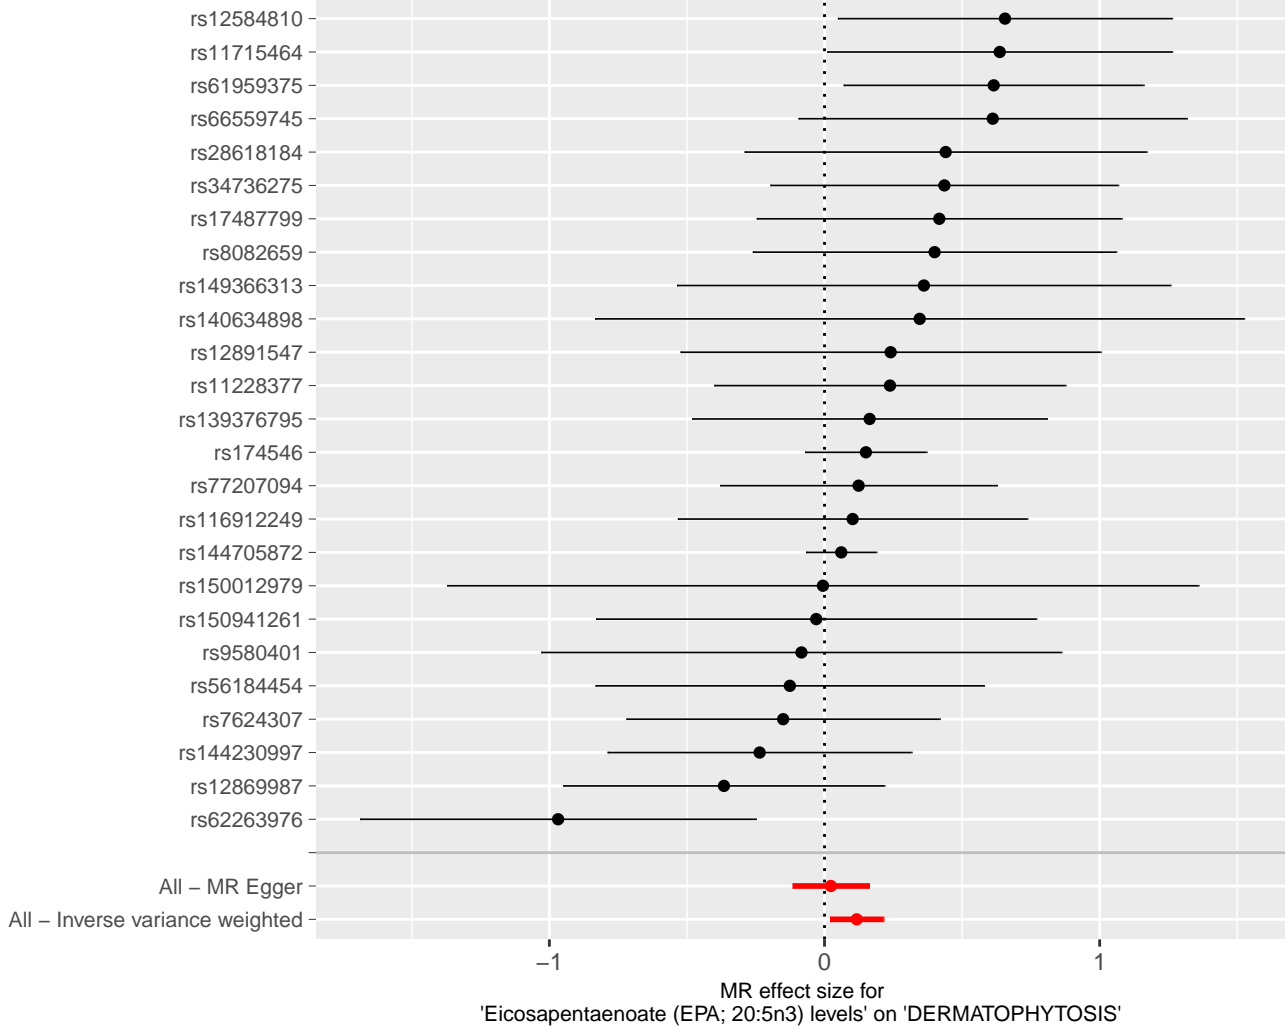

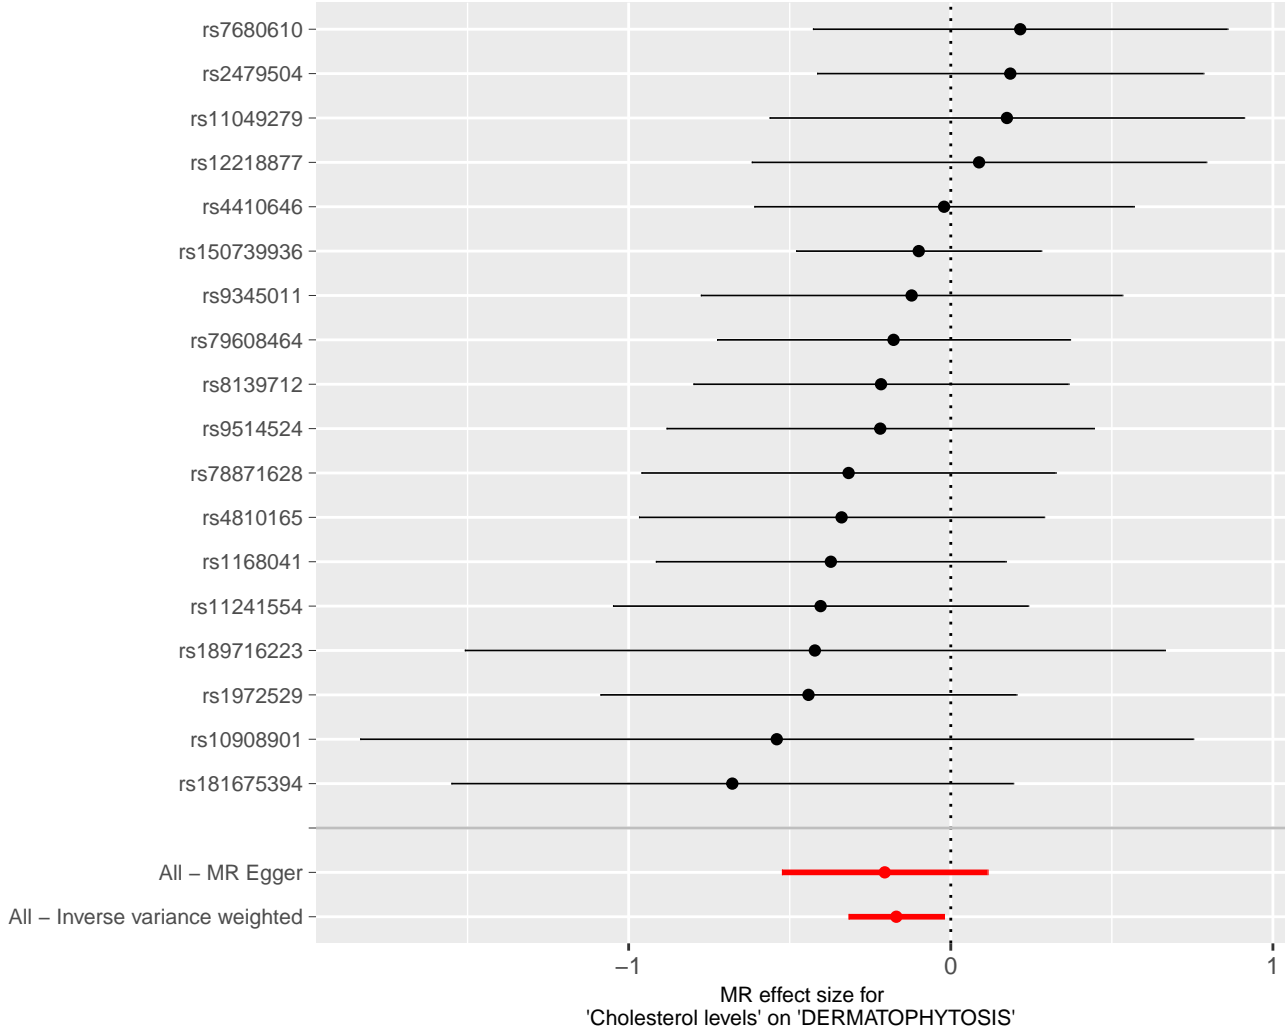

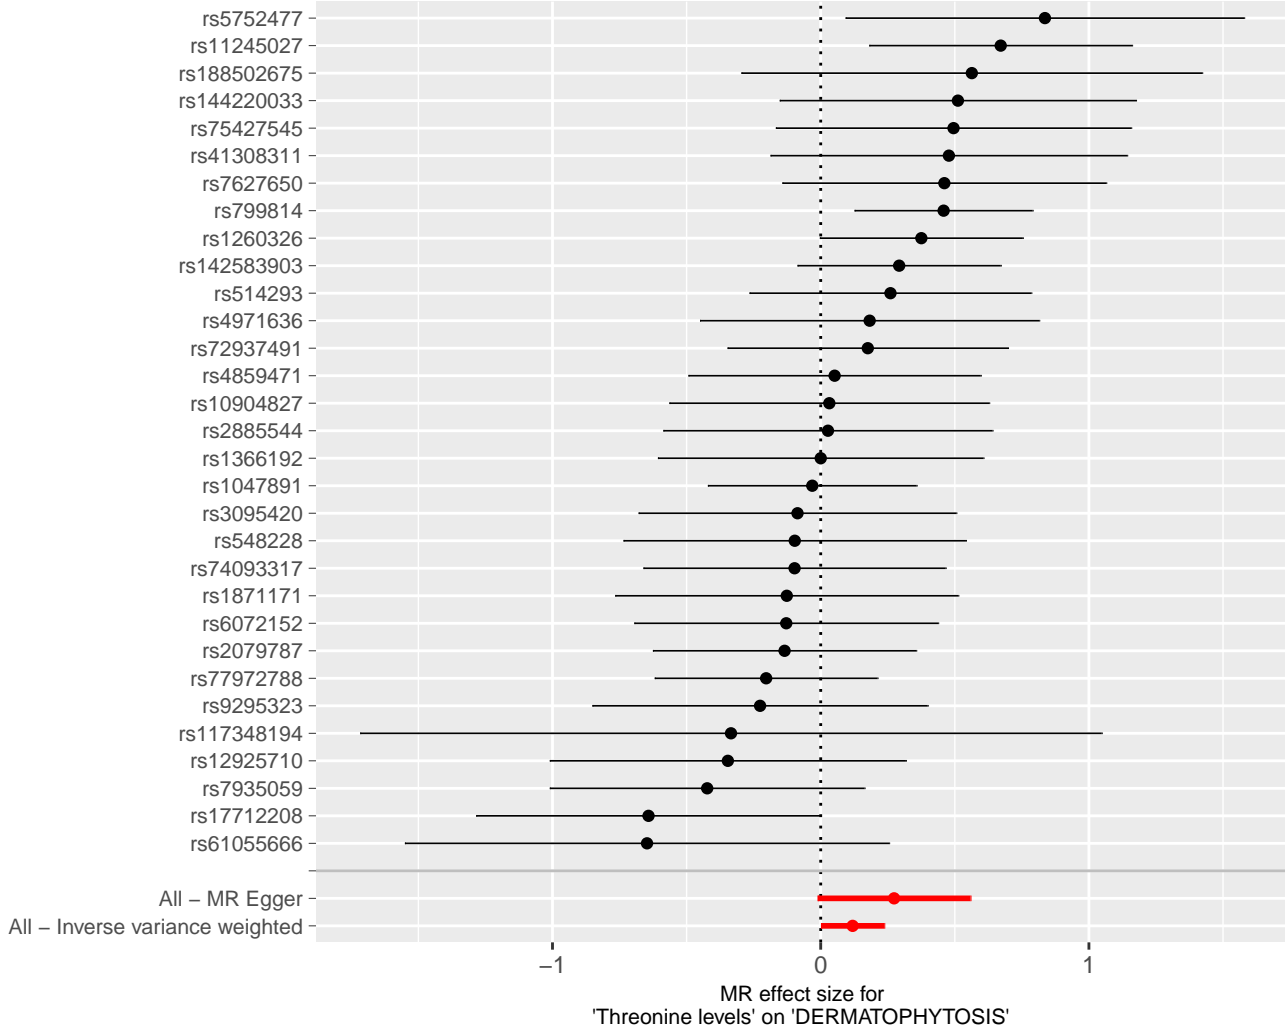

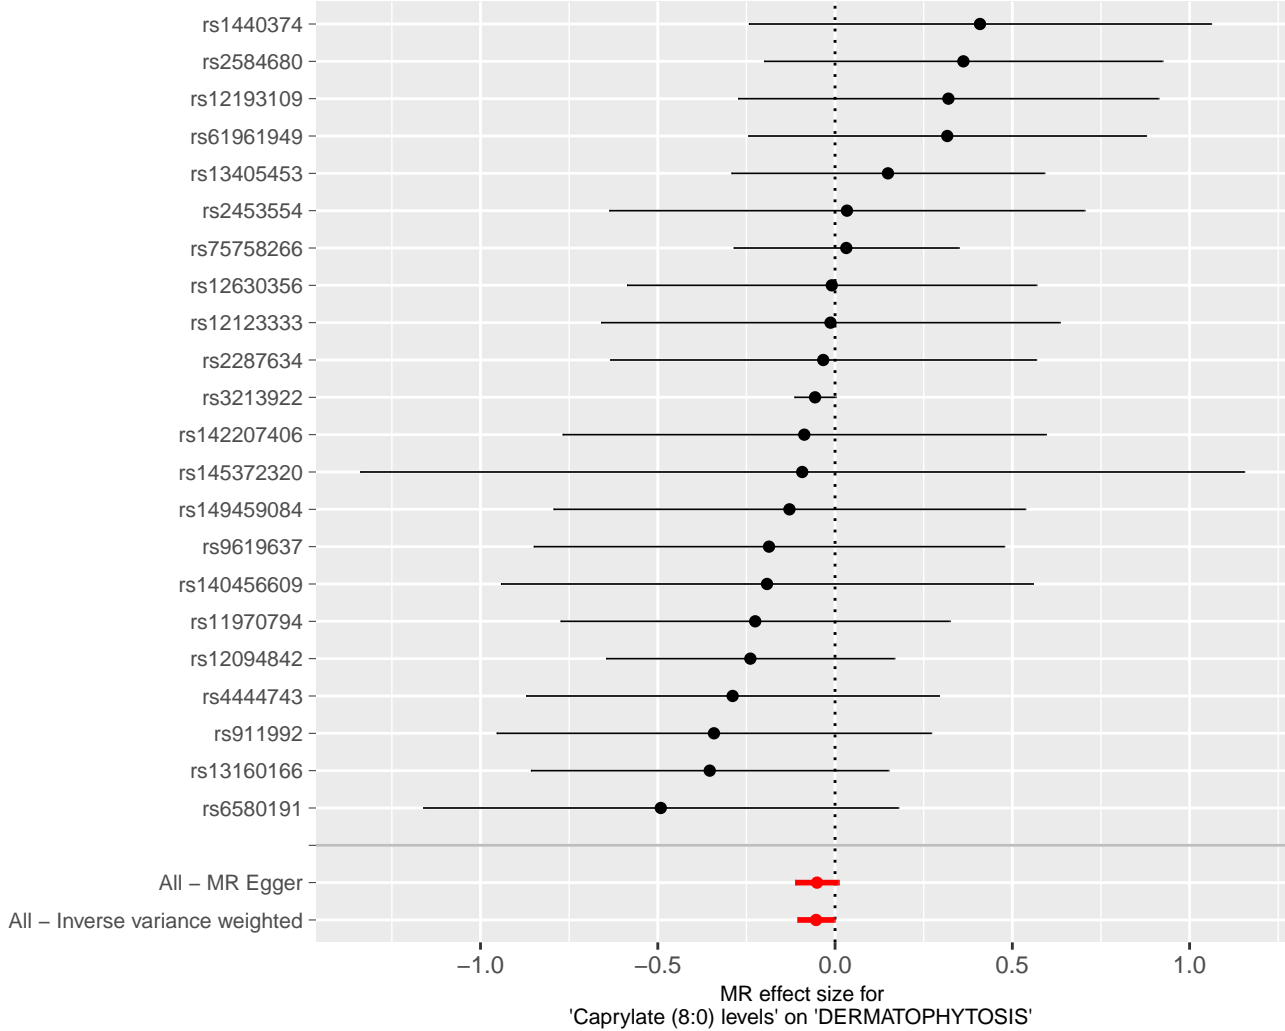

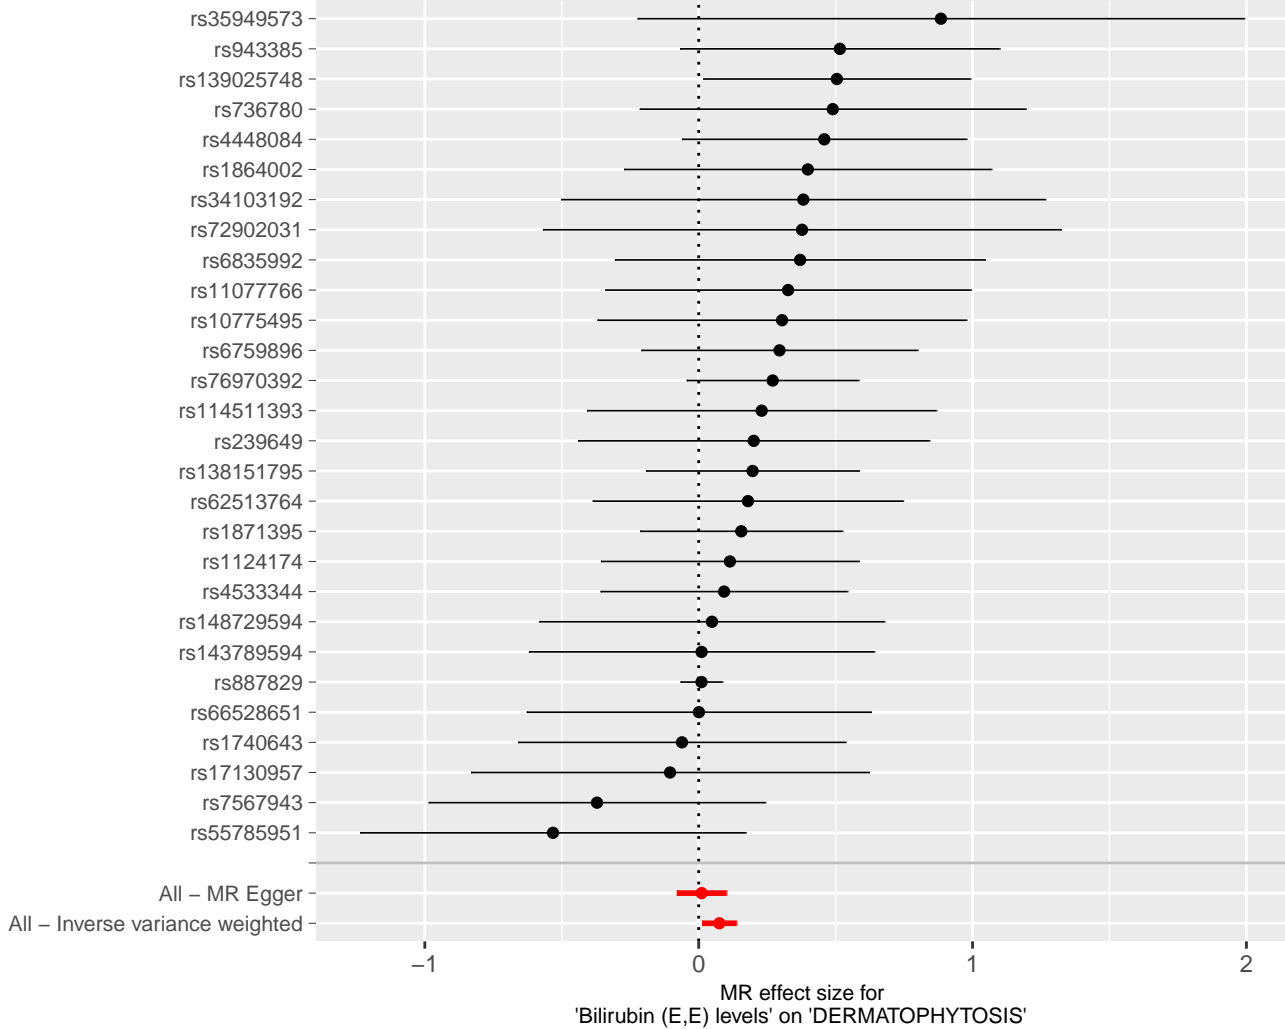

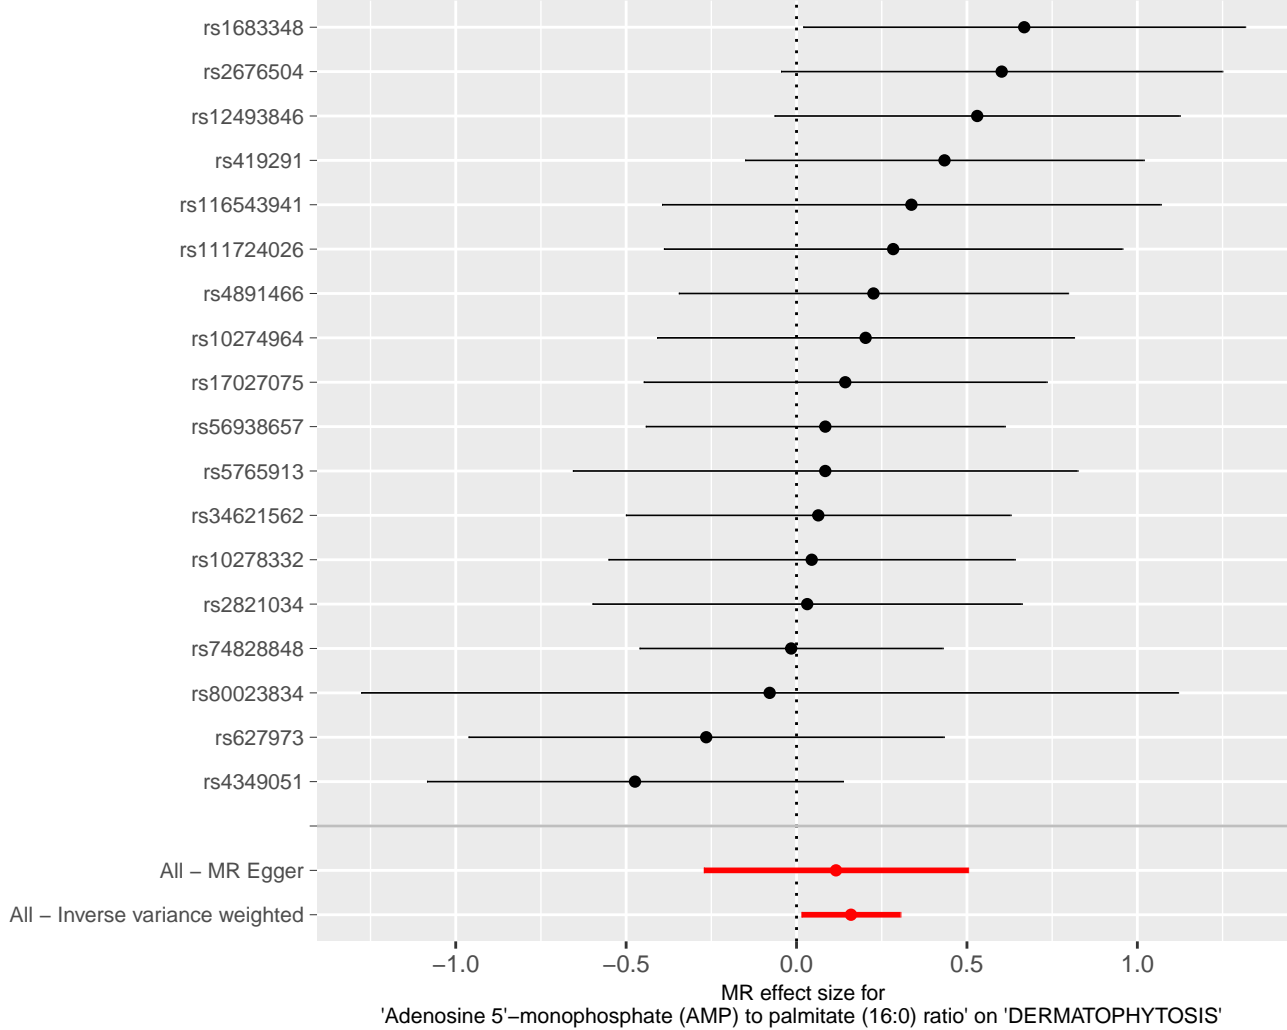

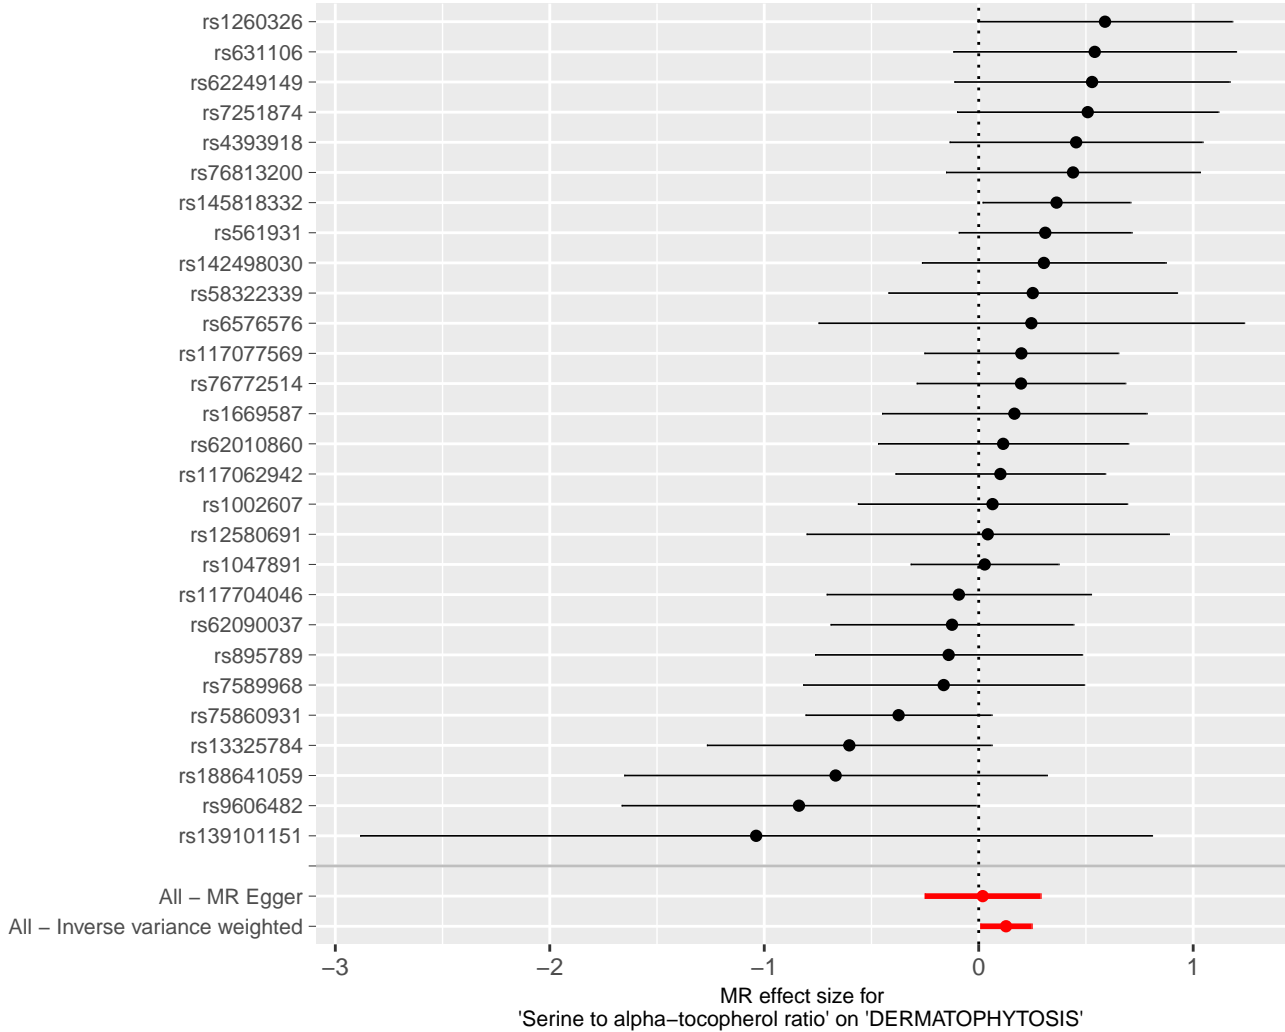

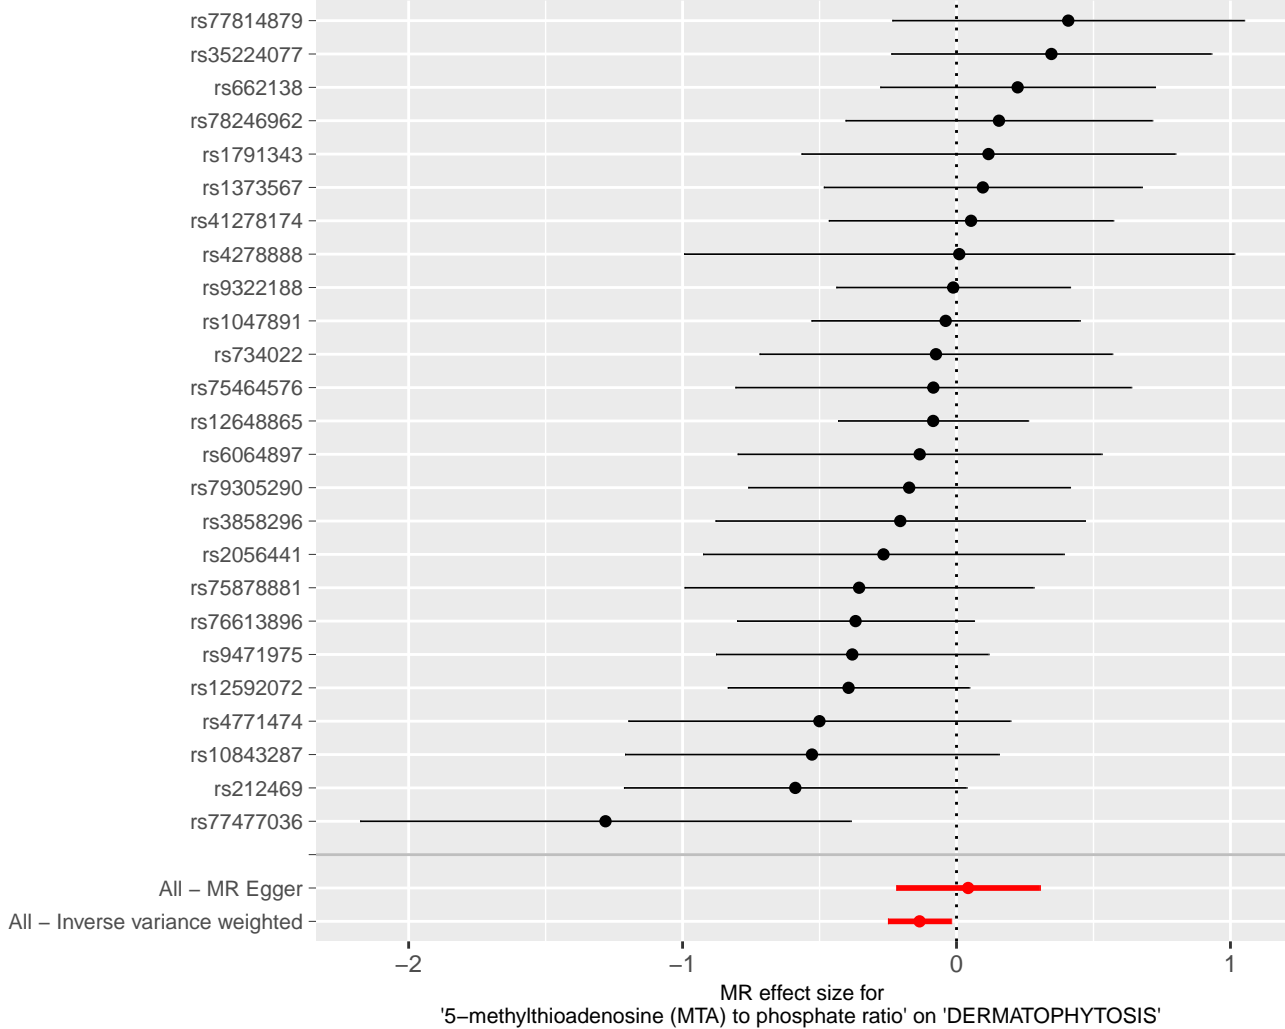

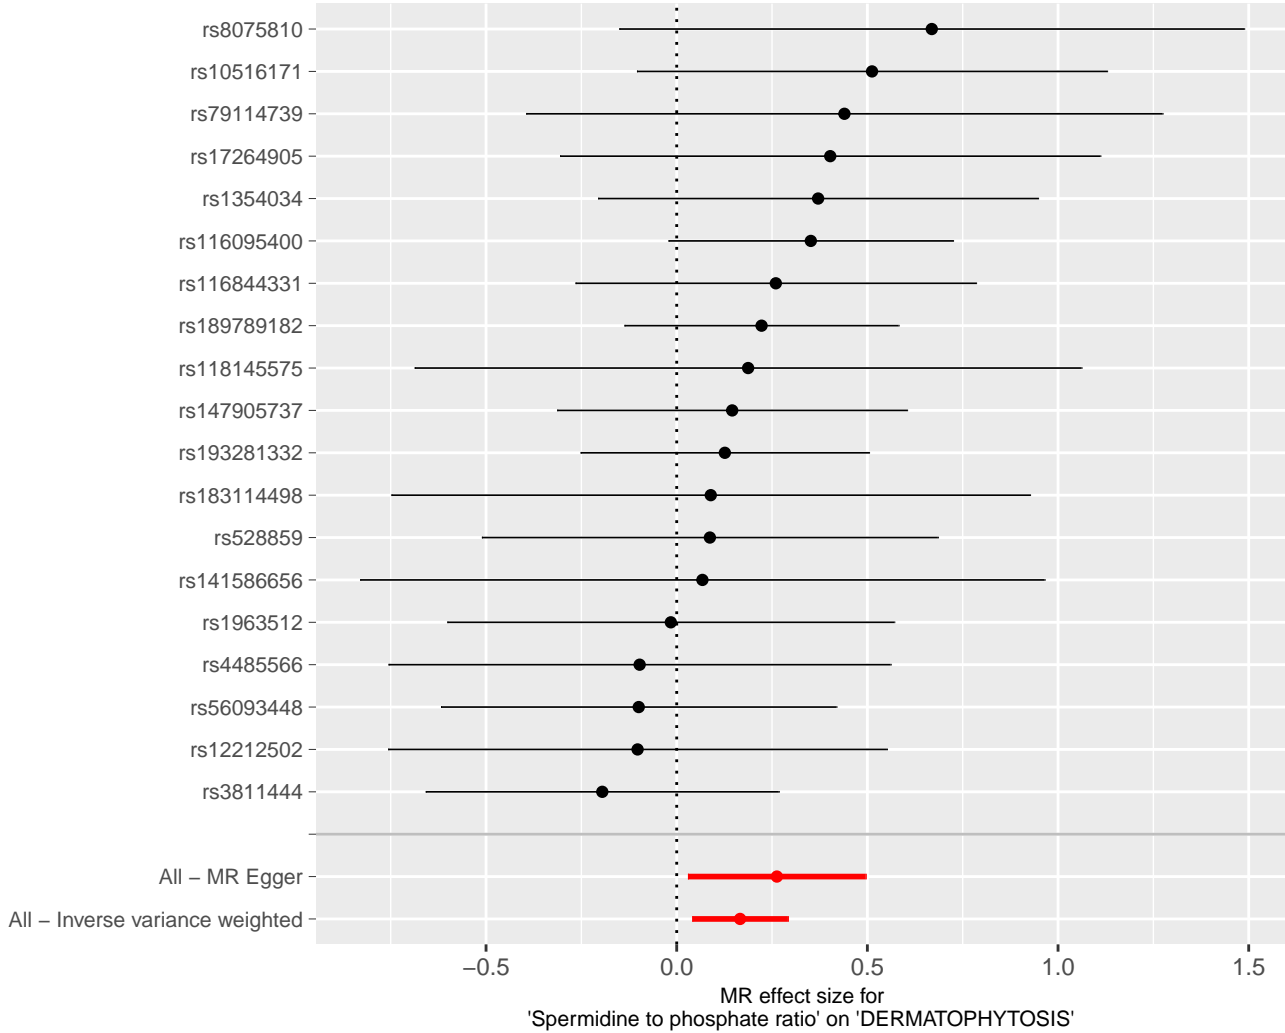

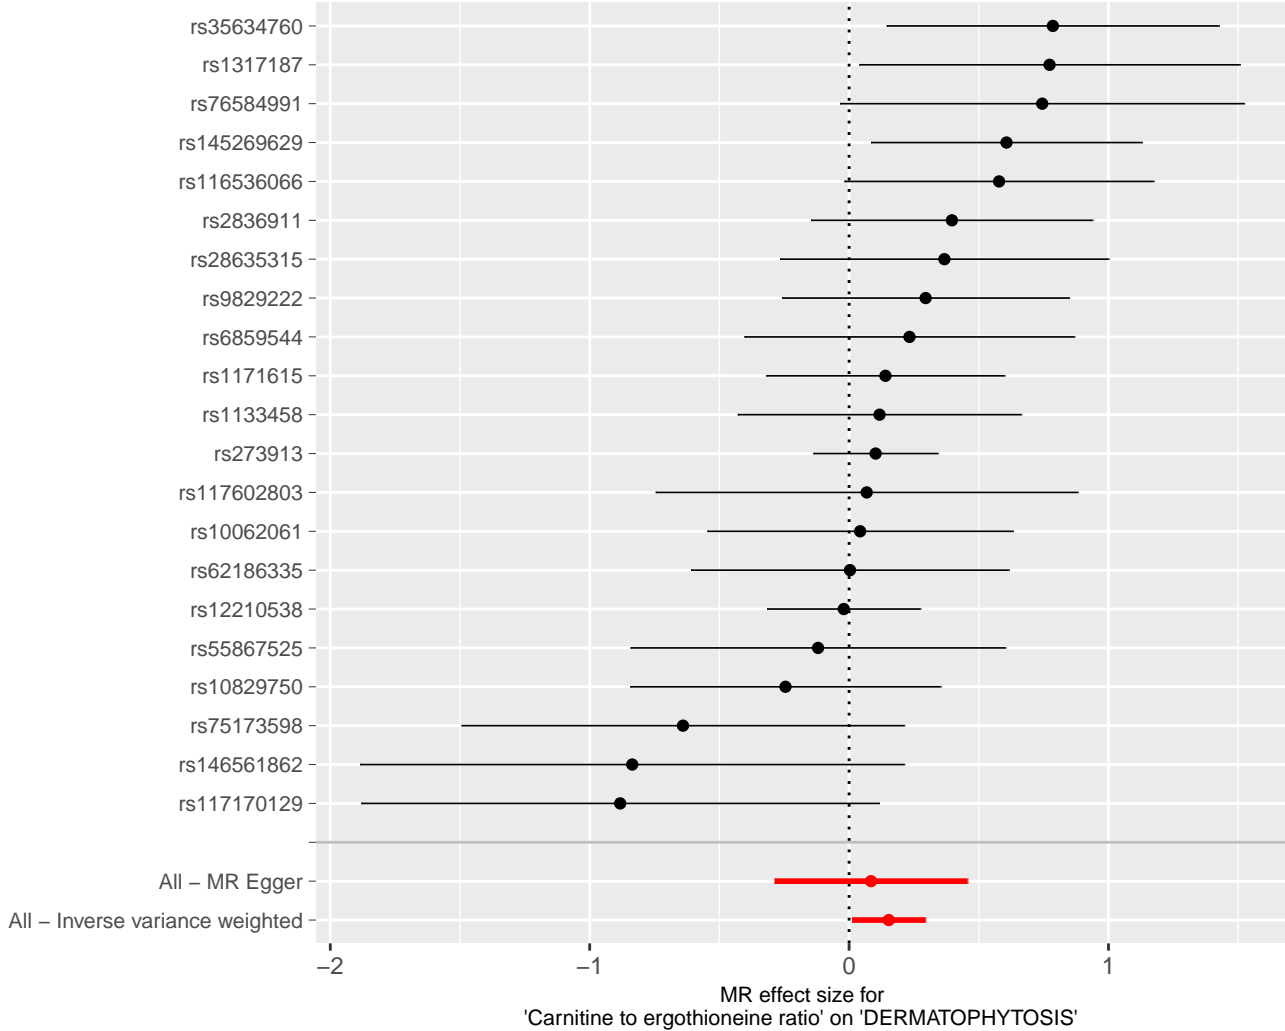

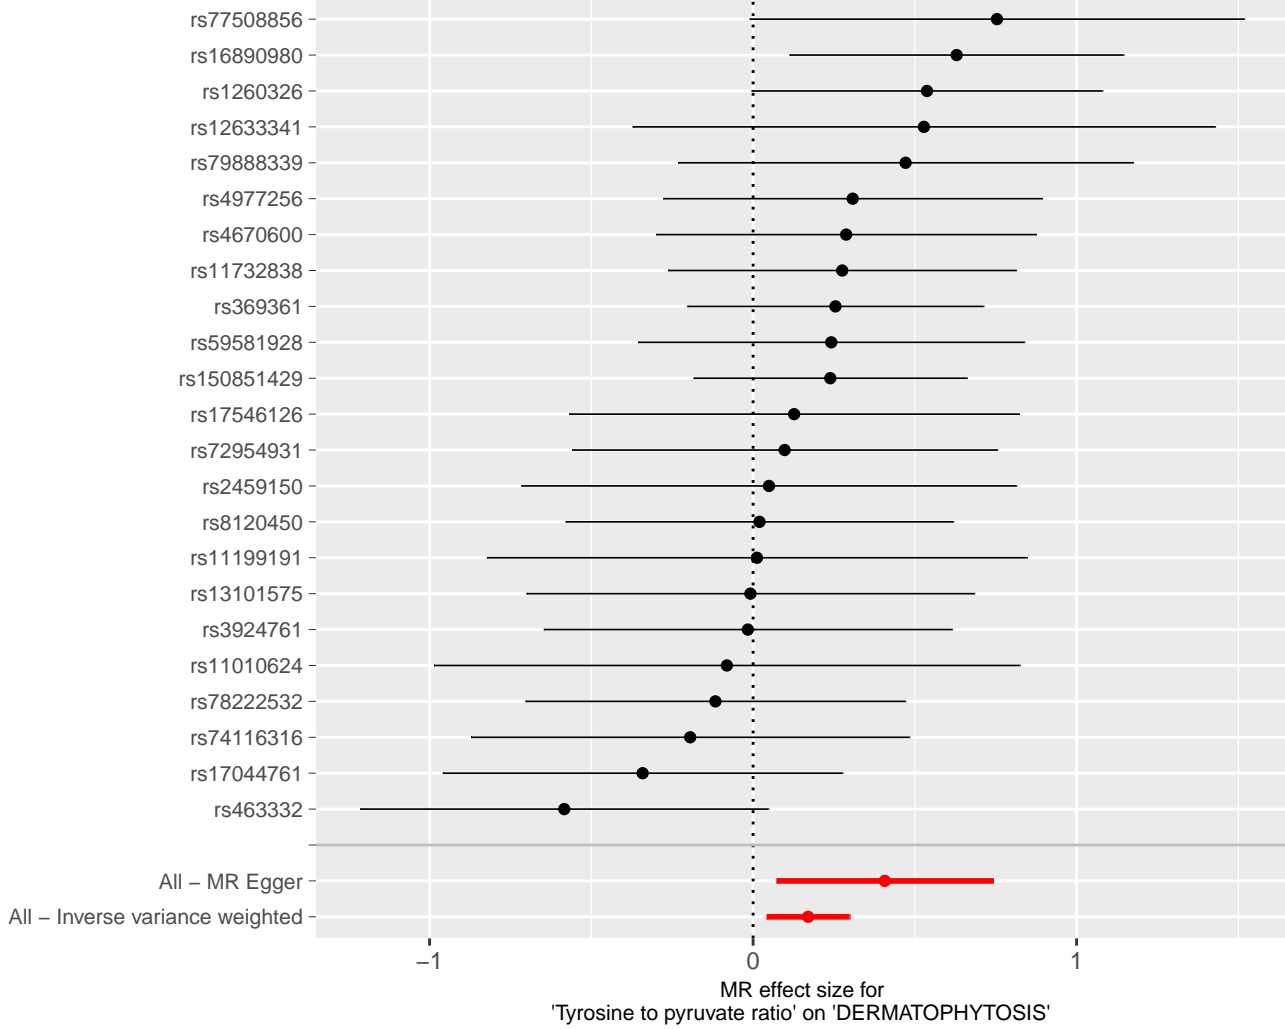

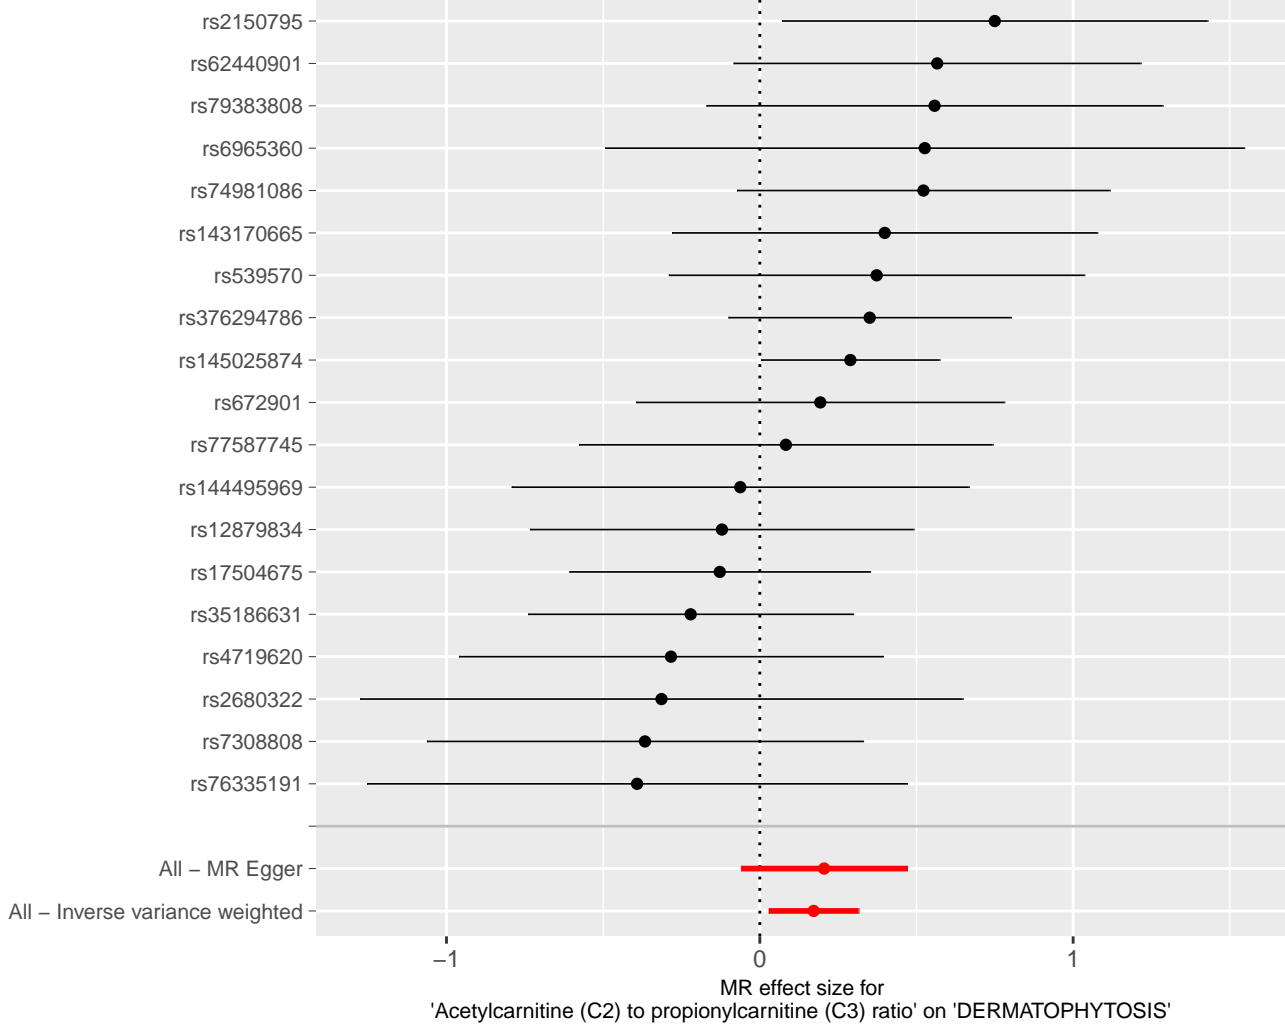

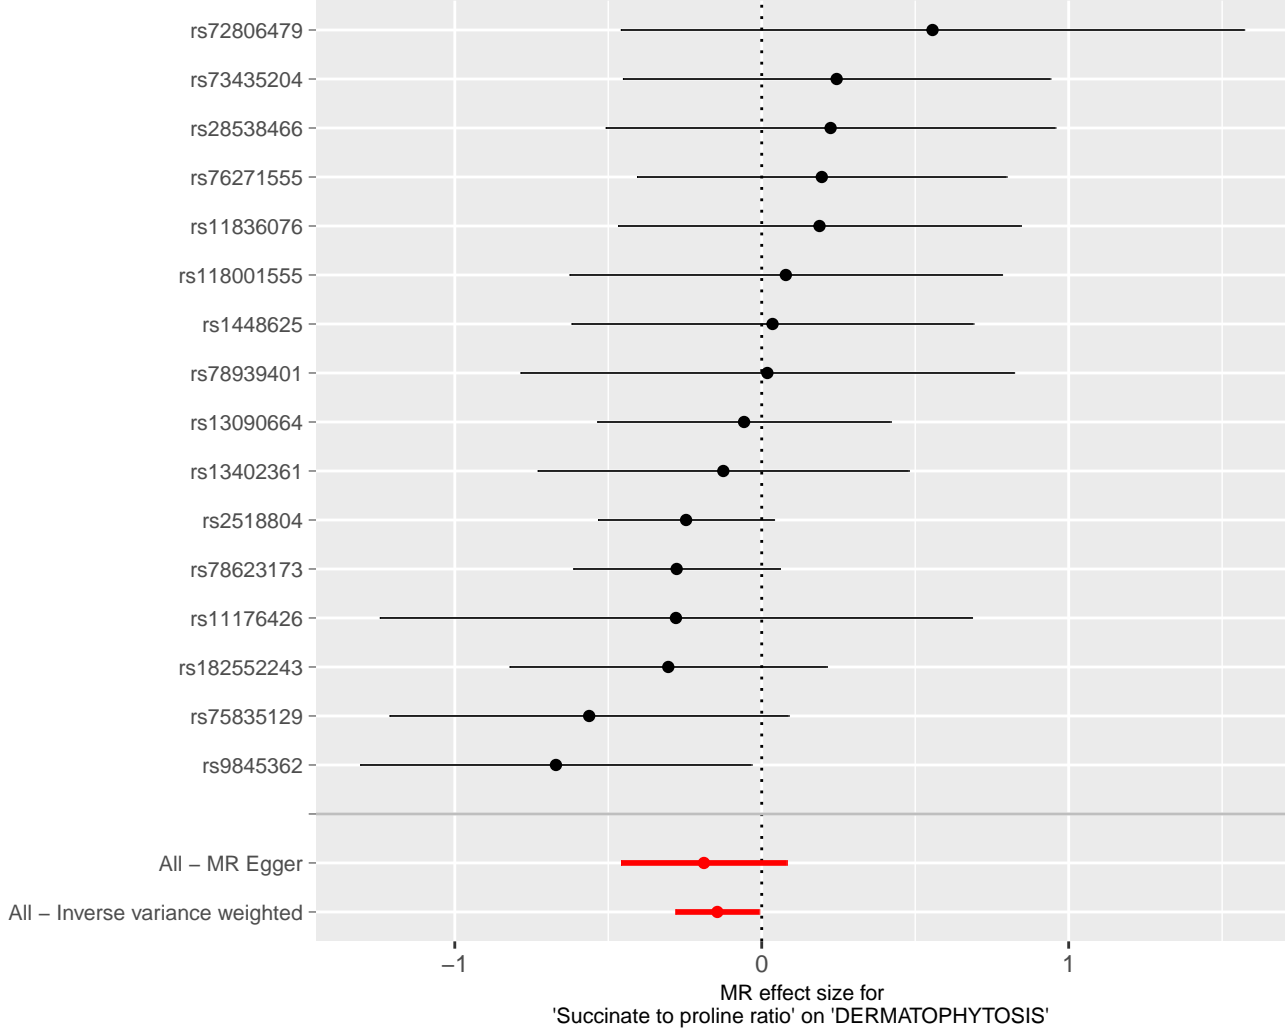

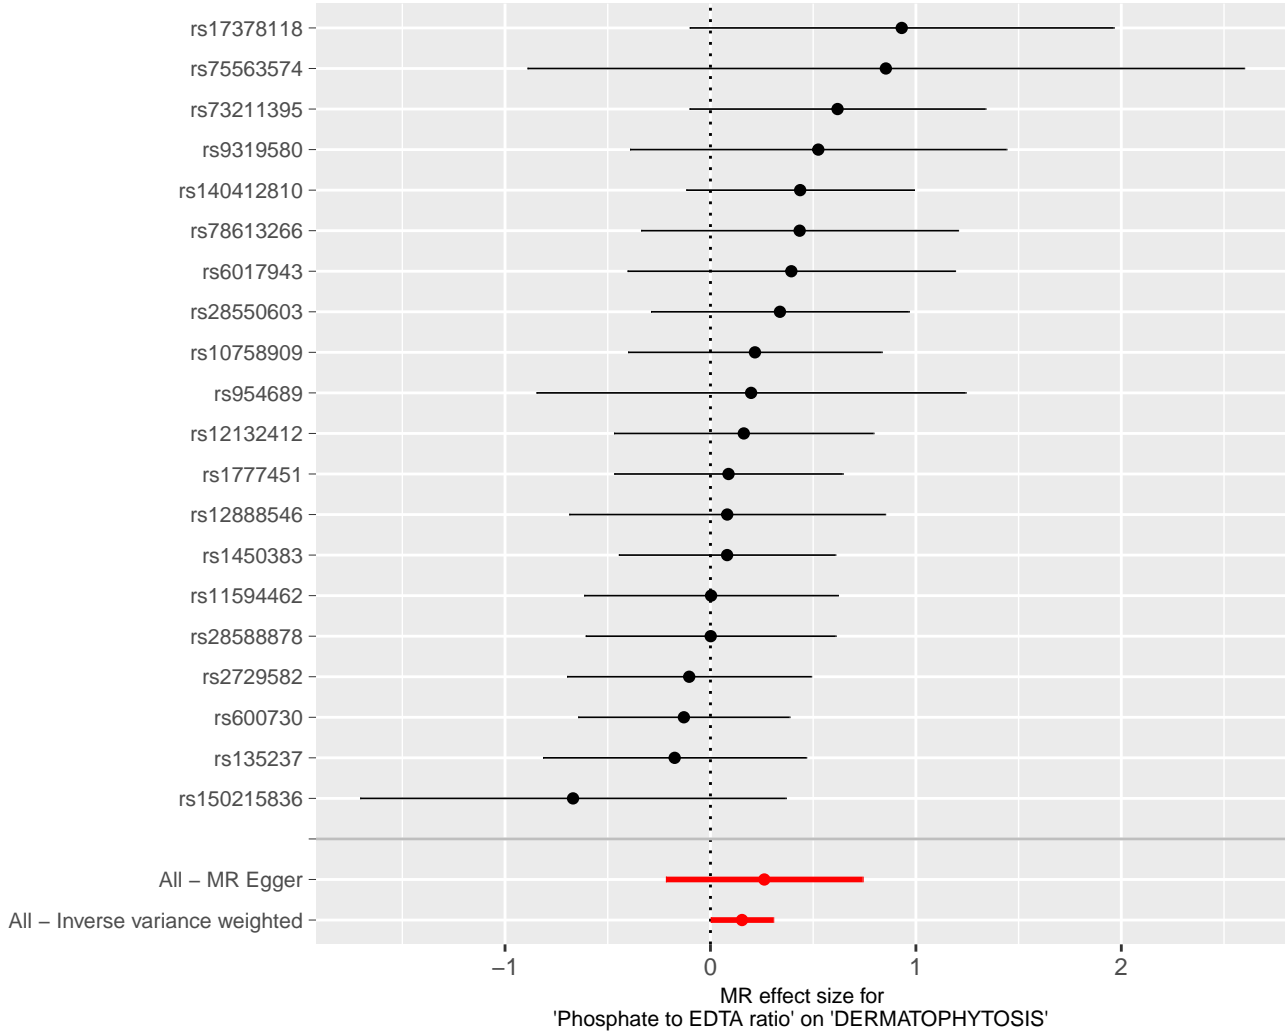

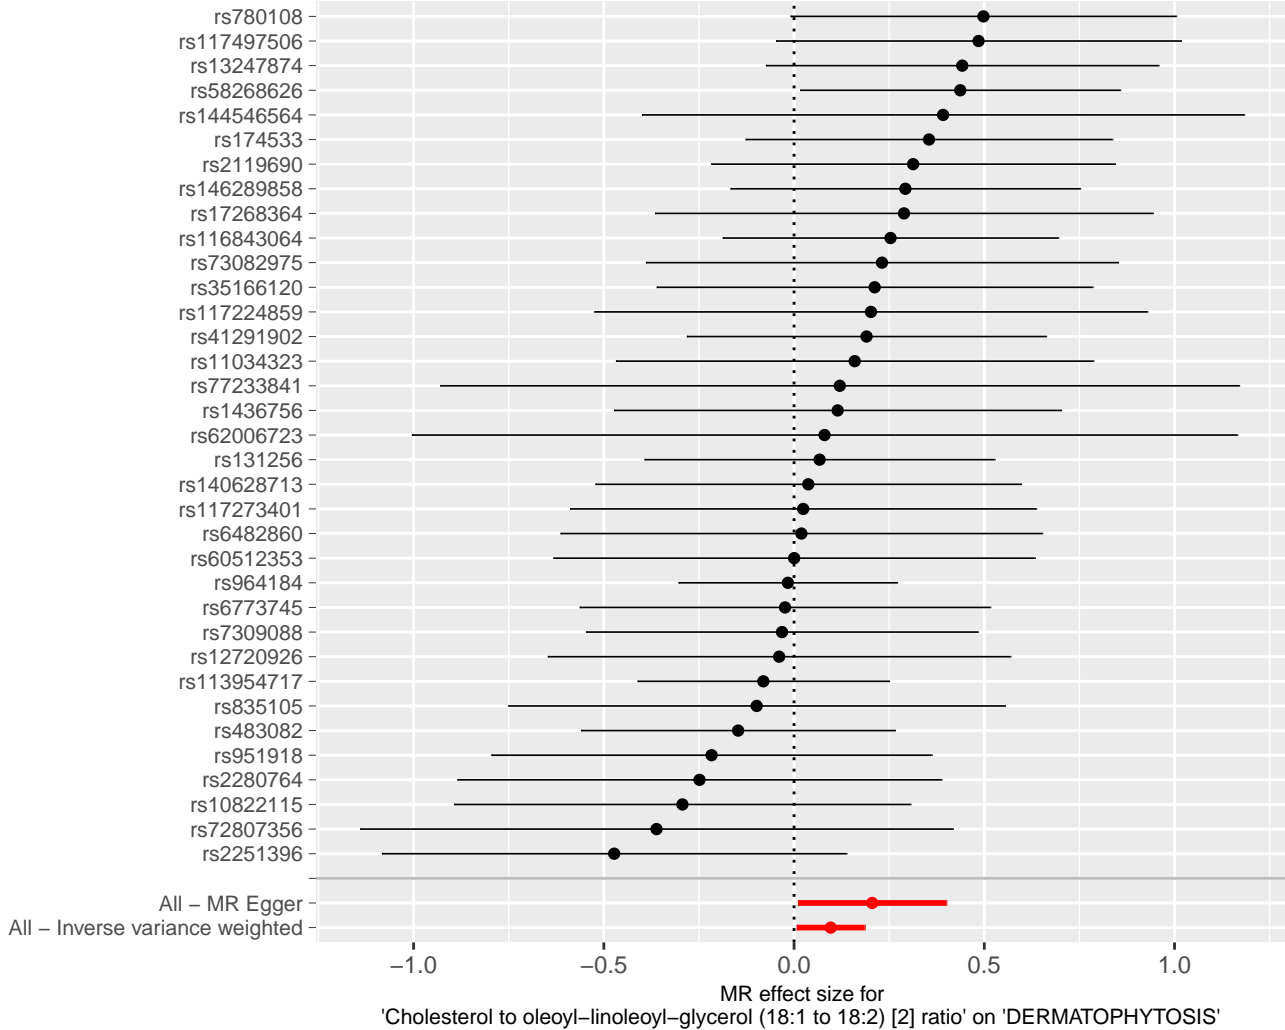

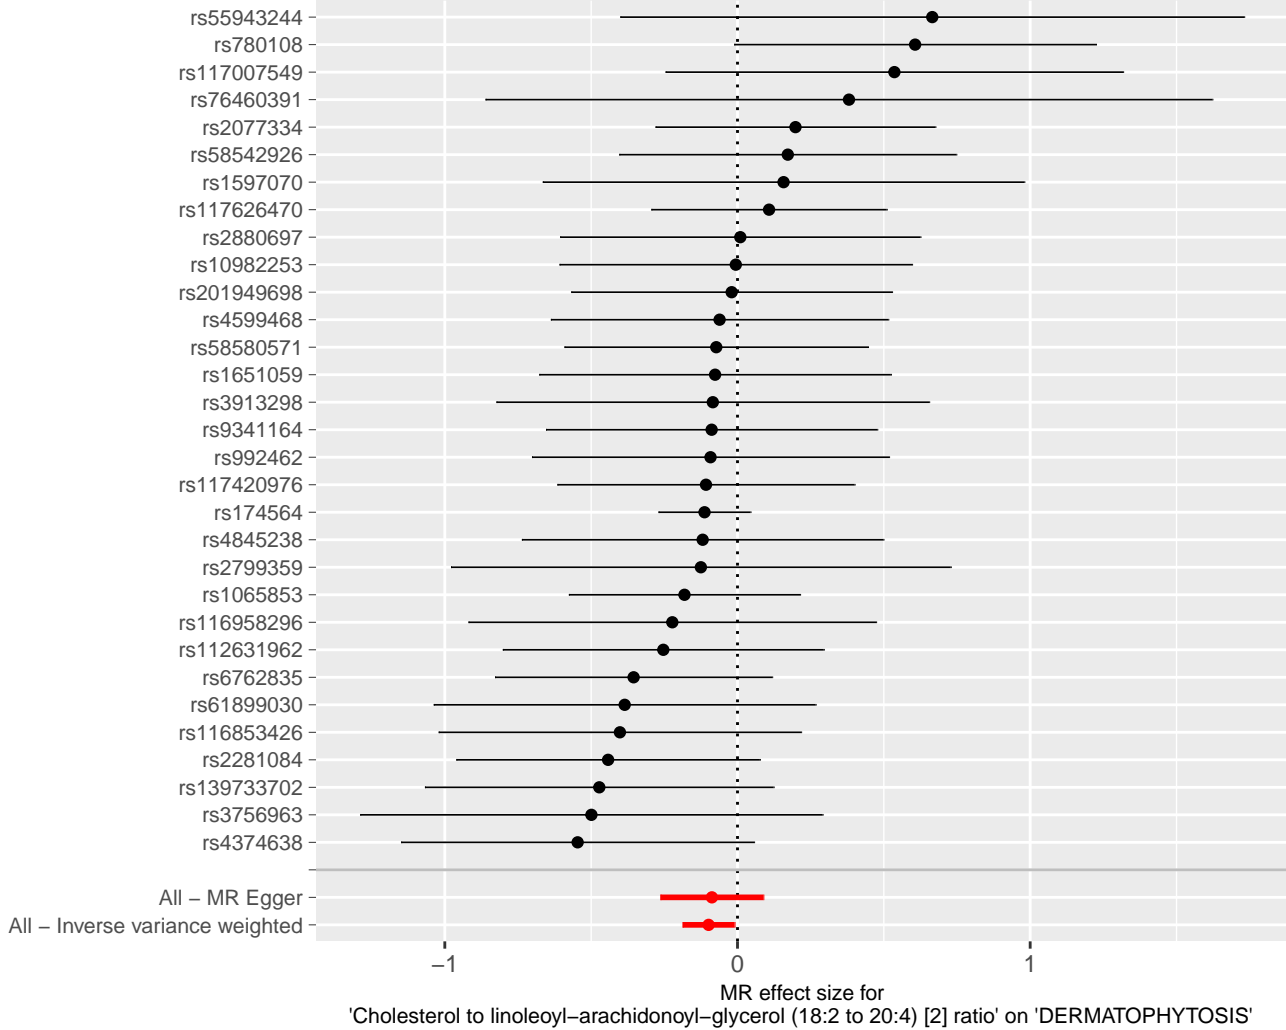

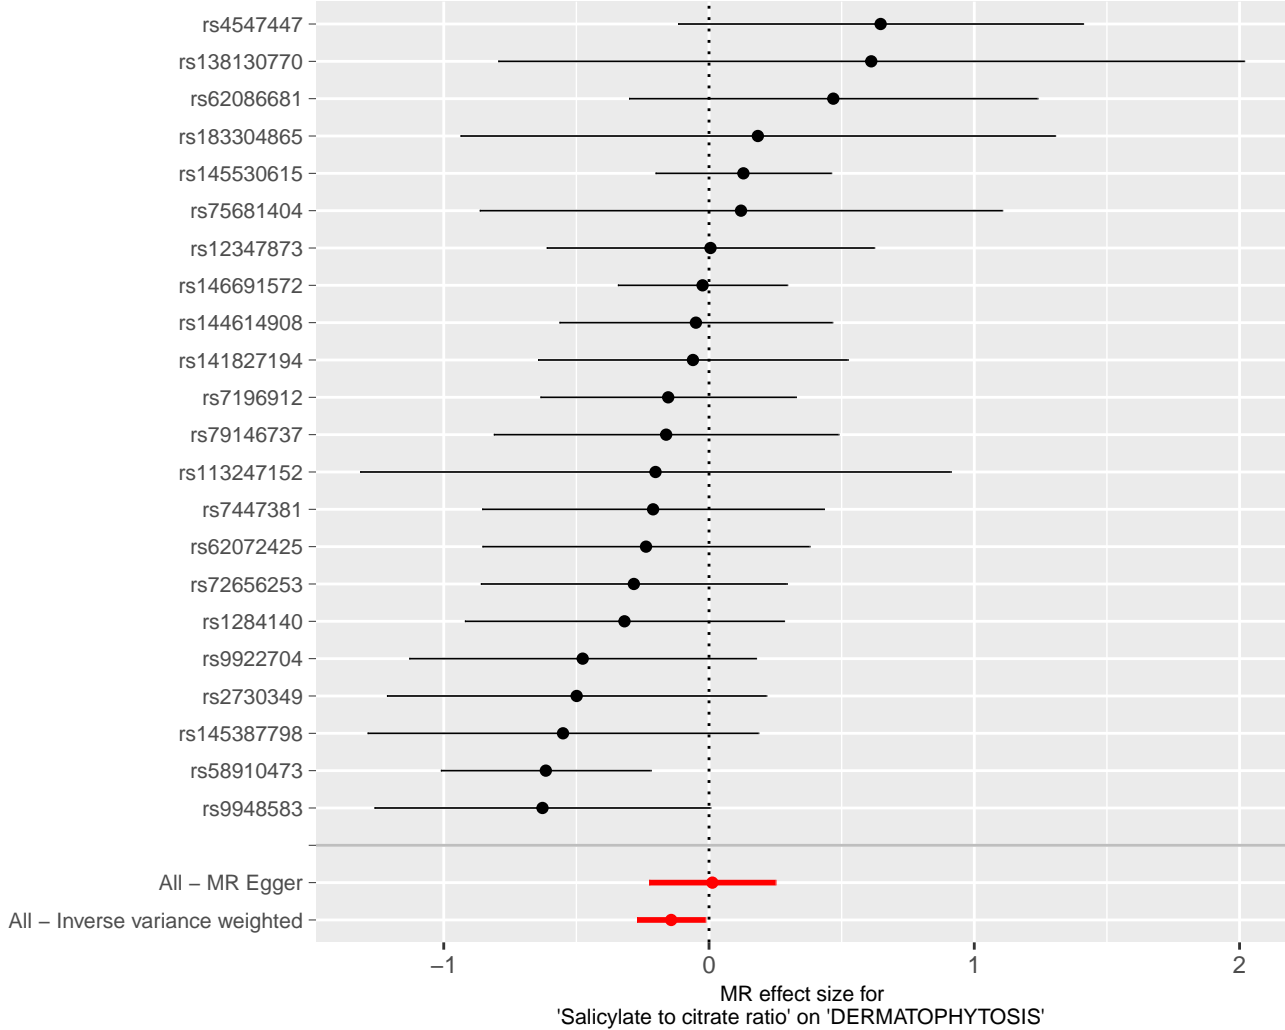

Supplement: Supplementary file 3 [file Figure S2.pdf › Figure S2.pdf]
